# Supplementary material for: A green lifetime biosensor for calcium that remains bright over its full dynamic range
Source: eLife. 2025 Dec 19;14:RP105086. doi: 10.7554/eLife.105086 (PMC12716836; doi:10.7554/eLife.105086)
Supplement: Figure 1—source data 1. [file elife-105086-fig1-data1.xlsx]

## Sheet: figure1
G-Ca-FLITS												Tq-Ca-FLITS
	low calcium, excitation spectrum		high calcium, excitation spectrum				low calcium, emission spectrum		high calcium, emission spectrum			see van der Linden et al. 2021, doi:10.1038/s41467-021-27249-w
wavelength (nm)	value	norm_value	value	norm_value		wavelength (nm)	value	norm_value	value	norm_value
350	0.416757	0.048052	0.325188	0.0374941		450	0.0933577	0.00153715	0.0717197	0.00118088
351	0.417885	0.0481821	0.322707	0.0372081		451	0.10495	0.00172802	0.0709163	0.00116765
352	0.420465	0.0484796	0.323892	0.0373447		452	0.118459	0.00195044	0.0750517	0.00123574
353	0.423527	0.0488326	0.324825	0.0374523		453	0.132793	0.00218646	0.077989	0.0012841
354	0.425968	0.0491141	0.326898	0.0376913		454	0.152555	0.00251184	0.082227	0.00135388
355	0.428908	0.049453	0.327733	0.0377876		455	0.176316	0.00290308	0.0878953	0.00144721
356	0.431037	0.0496985	0.327575	0.0377693		456	0.202227	0.0033297	0.092974	0.00153083
357	0.43312	0.0499387	0.329461	0.0379868		457	0.23178	0.0038163	0.0980363	0.00161418
358	0.434169	0.0500596	0.330032	0.0380527		458	0.267784	0.0044091	0.104702	0.00172393
359	0.437341	0.0504254	0.332033	0.0382834		459	0.313147	0.00515601	0.113903	0.00187543
360	0.439517	0.0506762	0.33386	0.038494		460	0.366222	0.0060299	0.125555	0.00206728
361	0.443182	0.0510988	0.337671	0.0389334		461	0.434208	0.0071493	0.139377	0.00229486
362	0.443884	0.0511798	0.33741	0.0389034		462	0.515731	0.00849158	0.159829	0.00263161
363	0.443158	0.0510961	0.335286	0.0386585		463	0.60968	0.0100385	0.183298	0.00301803
364	0.443362	0.0511196	0.333633	0.0384679		464	0.720393	0.0118614	0.213204	0.00351044
365	0.441866	0.0509471	0.331688	0.0382435		465	0.852185	0.0140313	0.250377	0.00412249
366	0.440973	0.0508441	0.32951	0.0379925		466	1.00472	0.0165429	0.296144	0.00487606
367	0.443541	0.0511403	0.329948	0.038043		467	1.17827	0.0194005	0.35153	0.00578799
368	0.444033	0.051197	0.330912	0.0381541		468	1.39085	0.0229005	0.412501	0.00679189
369	0.445032	0.0513121	0.329042	0.0379385		469	1.62659	0.0267821	0.491447	0.00809174
370	0.443988	0.0511918	0.327511	0.037762		470	1.89063	0.0311295	0.586803	0.0096618
371	0.444577	0.0512597	0.326958	0.0376982		471	2.18797	0.0360252	0.699482	0.0115171
372	0.444379	0.0512369	0.32776	0.0377907		472	2.52275	0.0415374	0.830514	0.0136745
373	0.445402	0.0513548	0.327001	0.0377032		473	2.89346	0.0476413	0.985155	0.0162207
374	0.446543	0.0514864	0.328712	0.0379005		474	3.30856	0.0544759	1.18103	0.0194458
375	0.448212	0.0516788	0.329822	0.0380284		475	3.76628	0.0620124	1.40399	0.023117
376	0.449071	0.0517778	0.329604	0.0380033		476	4.26941	0.0702964	1.66856	0.027473
377	0.449425	0.0518186	0.330746	0.0381349		477	4.816	0.0792962	1.98159	0.0326273
378	0.452901	0.0522194	0.33305	0.0384006		478	5.40944	0.0890672	2.34137	0.0385509
379	0.456522	0.052637	0.335802	0.038718		479	6.06189	0.09981	2.76163	0.0454707
380	0.459398	0.0529686	0.336863	0.0388403		480	6.77419	0.111538	3.24909	0.0534968
381	0.464424	0.0535481	0.341247	0.0393458		481	7.54231	0.124185	3.79916	0.0625538
382	0.468703	0.0540414	0.345044	0.0397836		482	8.35198	0.137517	4.41508	0.0726949
383	0.473018	0.0545389	0.348639	0.040198		483	9.24223	0.152175	5.10912	0.0841225
384	0.477157	0.0550161	0.352692	0.0406653		484	10.2154	0.168198	5.89289	0.0970273
385	0.484034	0.055809	0.359435	0.0414428		485	11.2272	0.184858	6.7653	0.111392
386	0.491226	0.0566383	0.365509	0.0421431		486	12.3451	0.203263	7.71979	0.127108
387	0.499505	0.0575929	0.371999	0.0428915		487	13.5818	0.223626	8.73969	0.1439
388	0.509083	0.0586972	0.379131	0.0437138		488	14.9177	0.245623	9.84776	0.162145
389	0.518105	0.0597374	0.386069	0.0445137		489	16.35	0.269204	11.0315	0.181635
390	0.528352	0.060919	0.394382	0.0454722		490	17.893	0.29461	12.2876	0.202316
391	0.538916	0.062137	0.40443	0.0466308		491	19.5464	0.321835	13.6159	0.224188
392	0.551427	0.0635795	0.414863	0.0478337		492	21.328	0.351169	15.008	0.247109
393	0.566087	0.0652698	0.42605	0.0491235		493	23.23	0.382486	16.4402	0.27069
394	0.582993	0.0672191	0.439243	0.0506447		494	25.2701	0.416076	17.91	0.29489
395	0.601938	0.0694034	0.454197	0.0523688		495	27.3848	0.450895	19.414	0.319654
396	0.622988	0.0718304	0.47047	0.0542451		496	29.6142	0.487602	20.9253	0.344538
397	0.642925	0.0741291	0.48753	0.0562122		497	31.8491	0.5244	22.4406	0.369488
398	0.664998	0.0766741	0.505208	0.0582505		498	34.1734	0.562669	23.9124	0.393721
399	0.691576	0.0797387	0.525394	0.0605778		499	36.5807	0.602306	25.3435	0.417284
400	0.721309	0.0831668	0.548463	0.0632378		500	39.0022	0.642176	26.7454	0.440366
401	0.752037	0.0867097	0.571714	0.0659186		501	41.4192	0.681973	28.1075	0.462794
402	0.784196	0.0904177	0.596544	0.0687815		502	43.747	0.7203	29.3643	0.483487
403	0.817481	0.0942555	0.621263	0.0716316		503	45.9685	0.756878	30.5212	0.502536
404	0.851705	0.0982015	0.648391	0.0747594		504	48.1442	0.792701	31.6533	0.521176
405	0.888256	0.102416	0.676236	0.0779699		505	50.2078	0.82668	32.6664	0.537858
406	0.928391	0.107043	0.705731	0.0813707		506	52.1189	0.858146	33.6167	0.553504
407	0.971718	0.112039	0.738651	0.0851663		507	53.8374	0.886441	34.4692	0.567541
408	1.01894	0.117484	0.77079	0.088872		508	55.3783	0.911812	35.1848	0.579323
409	1.06765	0.1231	0.807861	0.0931463		509	56.7795	0.934883	35.8268	0.589893
410	1.12091	0.129241	0.84527	0.0974595		510	57.9587	0.954299	36.3787	0.598981
411	1.17431	0.135398	0.887928	0.102378		511	58.894	0.969698	36.832	0.606444
412	1.23121	0.141958	0.928574	0.107065		512	59.7041	0.983037	37.2182	0.612803
413	1.28946	0.148675	0.972837	0.112168		513	60.1831	0.990924	37.4346	0.616367
414	1.35142	0.155818	1.01954	0.117553		514	60.5466	0.996908	37.6027	0.619133
415	1.41761	0.163451	1.06792	0.123131		515	60.7343	1	37.6966	0.620681
416	1.48741	0.171498	1.1176	0.128859		516	60.7164	0.999705	37.7192	0.621053
417	1.55909	0.179763	1.16903	0.13479		517	60.5832	0.997512	37.7314	0.621254
418	1.63066	0.188014	1.22125	0.14081		518	60.2062	0.991304	37.5658	0.618527
419	1.70589	0.196689	1.27265	0.146736		519	59.7696	0.984116	37.379	0.615451
420	1.78471	0.205777	1.32723	0.153029		520	59.1593	0.974067	37.1432	0.611569
421	1.86767	0.215342	1.3833	0.159495		521	58.5526	0.964077	36.875	0.607152
422	1.95346	0.225233	1.43832	0.165838		522	57.8425	0.952385	36.5599	0.601964
423	2.04033	0.235249	1.49512	0.172387		523	57.0544	0.93941	36.1666	0.595489
424	2.13138	0.245748	1.55491	0.179281		524	56.2391	0.925985	35.8095	0.589608
425	2.22171	0.256163	1.61258	0.185931		525	55.3572	0.911465	35.4094	0.583021
426	2.31516	0.266937	1.67224	0.192809		526	54.5528	0.89822	35.0292	0.576761
427	2.41229	0.278137	1.73292	0.199805		527	53.6953	0.884101	34.6528	0.570563
428	2.51469	0.289944	1.79701	0.207195		528	52.9264	0.87144	34.2804	0.564431
429	2.62415	0.302565	1.8624	0.214735		529	52.1143	0.85807	33.8569	0.557459
430	2.72833	0.314576	1.92771	0.222264		530	51.3106	0.844837	33.4816	0.55128
431	2.83764	0.32718	1.99459	0.229976		531	50.4782	0.831131	33.057	0.544289
432	2.95051	0.340194	2.06107	0.237642		532	49.7571	0.819258	32.6592	0.537739
433	3.06284	0.353145	2.12917	0.245493		533	48.9461	0.805905	32.2554	0.53109
434	3.18045	0.366706	2.20069	0.253739		534	48.2228	0.793995	31.8596	0.524572
435	3.30162	0.380677	2.27192	0.261952		535	47.4501	0.781273	31.4073	0.517126
436	3.42605	0.395024	2.3461	0.270506		536	46.7127	0.769131	30.9956	0.510347
437	3.55439	0.409821	2.41958	0.278977		537	45.9176	0.75604	30.5104	0.502358
438	3.68508	0.424889	2.49834	0.288058		538	45.1693	0.743719	30.0619	0.494974
439	3.81999	0.440444	2.57911	0.297371		539	44.3861	0.730823	29.569	0.486857
440	3.95822	0.456382	2.66476	0.307246		540	43.715	0.719775	29.1517	0.479988
441	4.10281	0.473053	2.74846	0.316897		541	42.9484	0.707153	28.662	0.471924
442	4.2487	0.489875	2.83361	0.326715		542	42.2326	0.695366	28.1824	0.464028
443	4.39214	0.506413	2.91811	0.336457		543	41.4844	0.683047	27.635	0.455015
444	4.52055	0.521219	2.99229	0.34501		544	40.7043	0.670203	27.1245	0.44661
445	4.63844	0.534812	3.0549	0.352229		545	39.9423	0.657656	26.6102	0.43814
446	4.79688	0.55308	3.14363	0.36246		546	39.1665	0.644883	26.108	0.429871
447	4.98207	0.574432	3.24472	0.374116		547	38.3761	0.631867	25.5816	0.421204
448	5.13889	0.592513	3.32566	0.383448		548	37.5656	0.618523	25.0198	0.411955
449	5.31109	0.612368	3.41356	0.393583		549	36.7733	0.605478	24.4885	0.403206
450	5.46967	0.630652	3.49315	0.40276		550	35.9749	0.592332	23.9472	0.394294
451	5.63181	0.649348	3.56537	0.411087		551	35.1404	0.578592	23.4339	0.385843
452	5.77445	0.665793	3.62077	0.417474		552	34.2974	0.564711	22.8783	0.376695
453	5.9165	0.682172	3.67107	0.423274		553	33.4359	0.550528	22.3278	0.36763
454	6.0496	0.697518	3.71339	0.428153		554	32.6213	0.537114	21.7744	0.358519
455	6.13385	0.707233	3.71764	0.428644		555	31.7323	0.522477	21.1989	0.349044
456	6.20572	0.715518	3.71386	0.428207		556	30.8904	0.508616	20.6736	0.340393
457	6.25336	0.721011	3.69556	0.426097		557	30.0634	0.494999	20.1484	0.331746
458	6.31974	0.728666	3.68828	0.425259		558	29.1901	0.48062	19.6168	0.322993
459	6.43136	0.741535	3.70417	0.42709		559	28.3796	0.467275	19.1016	0.314511
460	6.54596	0.754749	3.72547	0.429547		560	27.5679	0.453909	18.5436	0.305323
461	6.62344	0.763682	3.72955	0.430016		561	26.8093	0.441419	18.0366	0.296976
462	6.65353	0.767151	3.71282	0.428087		562	26.0101	0.428261	17.5371	0.288752
463	6.7272	0.775646	3.72097	0.429028		563	25.2458	0.415677	17.0647	0.280972
464	6.90207	0.795808	3.78265	0.436139		564	24.5274	0.403847	16.5934	0.273213
465	7.07931	0.816244	3.85227	0.444167		565	23.7683	0.391349	16.1395	0.265739
466	7.19736	0.829854	3.89403	0.448981		566	23.0838	0.380077	15.6676	0.257969
467	7.29665	0.841303	3.92783	0.452879		567	22.4111	0.369002	15.2258	0.250695
468	7.39014	0.852082	3.96553	0.457225		568	21.7459	0.35805	14.7968	0.243632
469	7.5517	0.87071	4.04648	0.466559		569	21.0778	0.347049	14.3767	0.236715
470	7.78897	0.898068	4.16384	0.480091		570	20.4671	0.336994	13.9796	0.230175
471	7.98159	0.920276	4.25521	0.490625		571	19.8466	0.326777	13.5725	0.223473
472	8.08308	0.931979	4.29657	0.495394		572	19.247	0.316904	13.1862	0.217113
473	8.17287	0.942331	4.33304	0.499599		573	18.6826	0.307611	12.8261	0.211183
474	8.2855	0.955317	4.37866	0.504858		574	18.1136	0.298244	12.4553	0.205078
475	8.36148	0.964078	4.40636	0.508053		575	17.5732	0.289345	12.0899	0.199062
476	8.42556	0.971466	4.41917	0.50953		576	17.0752	0.281145	11.7674	0.193751
477	8.52381	0.982794	4.43114	0.51091		577	16.5852	0.273077	11.4265	0.188139
478	8.56167	0.987159	4.40328	0.507698		578	16.1126	0.265296	11.1001	0.182764
479	8.55667	0.986583	4.34681	0.501186		579	15.6461	0.257616	10.7966	0.177768
480	8.56587	0.987644	4.29105	0.494758		580	15.1991	0.250255	10.4902	0.172723
481	8.59334	0.990811	4.23826	0.488671		581	14.7651	0.243109	10.1719	0.167482
482	8.63277	0.995358	4.18265	0.482259		582	14.3589	0.236422	9.91568	0.163263
483	8.65914	0.998398	4.10966	0.473843		583	13.982	0.230215	9.66508	0.159137
484	8.67304	1	4.01375	0.462784		584	13.6102	0.224093	9.41121	0.154957
485	8.64155	0.99637	3.88758	0.448238		585	13.2323	0.217872	9.1584	0.150794
486	8.53885	0.984529	3.71966	0.428877		586	12.8591	0.211726	8.90199	0.146573
487	8.40813	0.969457	3.52407	0.406325		587	12.5052	0.2059	8.64148	0.142283
488	8.29171	0.956034	3.33506	0.384533		588	12.1627	0.20026	8.40759	0.138432
489	8.19552	0.944942	3.15452	0.363715		589	11.8377	0.194909	8.19066	0.13486
490	8.07267	0.930778	2.9734	0.342833		590	11.5117	0.189542	7.96806	0.131195
491	7.95053	0.916695	2.79814	0.322625		591	11.2013	0.184431	7.73632	0.12738
492	7.85061	0.905174	2.63922	0.304301		592	10.8782	0.179111	7.51345	0.12371
493	7.76264	0.895031	2.4907	0.287177		593	10.5576	0.173833	7.32118	0.120544
494	7.66469	0.883738	2.34444	0.270314		594	10.2639	0.168996	7.12952	0.117389
495	7.53493	0.868776	2.19778	0.253403		595	9.9794	0.164312	6.94705	0.114384
496	7.36139	0.848767	2.03861	0.235051		596	9.69011	0.159549	6.75269	0.111184
497	7.1364	0.822826	1.87227	0.215872		597	9.43358	0.155325	6.56142	0.108035
498	6.88616	0.793974	1.71085	0.197261		598	9.15258	0.150699	6.37964	0.105042
499	6.62333	0.763669	1.56181	0.180077		599	8.92322	0.146922	6.21377	0.102311
500	6.35288	0.732487	1.42411	0.1642		600	8.67216	0.142788	6.06631	0.0998827
501	6.05758	0.698438	1.29533	0.149352		601	8.41923	0.138624	5.89148	0.097004
502	5.75924	0.66404	1.17442	0.13541		602	8.18017	0.134688	5.7339	0.0944095
503	5.43798	0.626998	1.05841	0.122035		603	7.9646	0.131138	5.58005	0.0918763
504	5.09893	0.587906	0.9513	0.109685		604	7.75244	0.127645	5.43618	0.0895075
505	4.74673	0.547297	0.850245	0.0980331		605	7.53424	0.124052	5.30711	0.0873823
506	4.39082	0.506261	0.756529	0.0872277		606	7.33505	0.120773	5.17839	0.0852629
507	4.02921	0.464568	0.670365	0.077293		607	7.13663	0.117506	5.04546	0.0830742
508	3.67032	0.423187	0.591245	0.0681705		608	6.9203	0.113944	4.90043	0.0806863
509	3.31715	0.382467	0.519163	0.0598594		609	6.74458	0.111051	4.77977	0.0786996
510	2.97777	0.343336	0.455035	0.0524655		610	6.55672	0.107957	4.649	0.0765465
511	2.65663	0.306309	0.397057	0.0457806		611	6.38145	0.105071	4.51689	0.0743713
512	2.3569	0.27175	0.345483	0.0398341		612	6.22817	0.102548	4.41612	0.072712
513	2.08135	0.239979	0.301116	0.0347186		613	6.06537	0.0998672	4.29631	0.0707393
514	1.82632	0.210575	0.262525	0.0302691		614	5.91059	0.0973187	4.18022	0.0688279
515	1.59375	0.183759	0.227746	0.026259		615	5.75603	0.0947738	4.07172	0.0670415
516	1.38743	0.159971	0.198247	0.0228579		616	5.60893	0.0923519	3.97071	0.0653783
517	1.19917	0.138264	0.171852	0.0198145		617	5.48053	0.0902378	3.87394	0.063785
518	1.03184	0.118971	0.149288	0.0172129		618	5.34712	0.0880412	3.78067	0.0622492
519	0.884041	0.10193	0.130433	0.0150389		619	5.2325	0.0861538	3.68942	0.0607468
520	0.7557	0.0871321	0.114424	0.013193		620	5.10274	0.0840173	3.59528	0.0591969
521	0.644395	0.0742986	0.100761	0.0116177		621	4.96933	0.0818207	3.49532	0.057551
522	0.548754	0.0632713	0.0893637	0.0103036		622	4.84556	0.0797828	3.42273	0.0563557
523	0.46711	0.0538577	0.0791197	0.00912249		623	4.74789	0.0781746	3.3246	0.0547401
524	0.396575	0.045725	0.070998	0.00818606		624	4.64387	0.076462	3.24487	0.0534273
525	0.336896	0.0388441	0.063547	0.00732696		625	4.52769	0.0745491	3.1605	0.0520381
526	0.285207	0.0328844	0.0577003	0.00665284		626	4.42468	0.072853	3.09099	0.0508935
527	0.242681	0.0279811	0.053065	0.00611839		627	4.31941	0.0711198	3.02656	0.0498327
528	0.206966	0.0238632	0.0488053	0.00562725		628	4.22175	0.0695117	2.95652	0.0486795
529	0.17777	0.0204968	0.0464157	0.00535172		629	4.1506	0.0683402	2.90442	0.0478218
530	0.153491	0.0176975	0.0441493	0.00509041		630	4.06802	0.0669806	2.84529	0.0468481
						631	3.99145	0.0657198	2.79265	0.0459814
						632	3.9177	0.0645055	2.74451	0.0451887
						633	3.84109	0.0632441	2.69305	0.0443415
						634	3.77144	0.0620974	2.64812	0.0436017
						635	3.71266	0.0611295	2.59554	0.0427359
						636	3.65289	0.0601454	2.54502	0.0419041
						637	3.58519	0.0590308	2.49214	0.0410335
						638	3.51233	0.057831	2.44686	0.0402879
						639	3.44899	0.0567881	2.397	0.039467
						640	3.37737	0.0556088	2.35527	0.0387799
						641	3.31667	0.0546095	2.31922	0.0381864
						642	3.25481	0.0535909	2.27126	0.0373966
						643	3.18563	0.0524519	2.23393	0.0367821
						644	3.12037	0.0513773	2.20113	0.0362419
						645	3.0568	0.0503307	2.17169	0.0357572
						646	2.99649	0.0493376	2.13933	0.0352245
						647	2.94663	0.0485168	2.107	0.034692
						648	2.904	0.0478147	2.07637	0.0341877
						649	2.86726	0.0472098	2.0505	0.0337618
						650	2.8258	0.0465271	2.01828	0.0332313
						651	2.79037	0.0459439	1.98426	0.0326712
						652	2.74256	0.0451567	1.93835	0.0319152
						653	2.69758	0.044416	1.90271	0.0313284
						654	2.67355	0.0440205	1.87086	0.030804
						655	2.62594	0.0432365	1.84481	0.0303751
						656	2.59295	0.0426933	1.82221	0.0300029
						657	2.55254	0.042028	1.79382	0.0295355
						658	2.50434	0.0412344	1.76596	0.0290768
						659	2.47005	0.0406697	1.74697	0.0287642
						660	2.43817	0.0401447	1.73313	0.0285362
						661	2.41678	0.0397927	1.70432	0.0280618
						662	2.39363	0.0394115	1.67811	0.0276303
						663	2.3736	0.0390817	1.65138	0.0271903
						664	2.33853	0.0385043	1.62925	0.0268258
						665	2.31827	0.0381707	1.60783	0.0264732
						666	2.29084	0.037719	1.59564	0.0262724
						667	2.26475	0.0372895	1.57741	0.0259722
						668	2.24132	0.0369036	1.56689	0.0257991
						669	2.21818	0.0365226	1.55874	0.0256649
						670	2.19355	0.0361171	1.53527	0.0252785
						671	2.1802	0.0358973	1.52792	0.0251574
						672	2.15855	0.0355409	1.52257	0.0250693
						673	2.13795	0.0352017	1.5017	0.0247257
						674	2.13492	0.0351517	1.48743	0.0244908
						675	2.11925	0.0348938	1.47421	0.024273
						676	2.09933	0.0345658	1.46054	0.0240481
						677	2.08254	0.0342892	1.45202	0.0239077
						678	2.05871	0.0338969	1.456	0.0239733
						679	2.0263	0.0333632	1.45208	0.0239087
						680	2.01169	0.0331227	1.45369	0.0239353
						681	1.99805	0.0328982	1.44319	0.0237623
						682	1.9766	0.0325449	1.42428	0.023451
						683	1.95216	0.0321427	1.42367	0.0234409
						684	1.9387	0.031921	1.40187	0.0230821
						685	1.93571	0.0318717	1.37805	0.0226899
						686	1.92145	0.0316369	1.3686	0.0225343
						687	1.91563	0.0315412	1.34946	0.0222191
						688	1.90939	0.0314383	1.33796	0.0220297
						689	1.89698	0.031234	1.32055	0.0217431
						690	1.89156	0.0311448	1.32139	0.0217569
						691	1.89425	0.0311891	1.31918	0.0217206
						692	1.89538	0.0312077	1.31694	0.0216836
						693	1.88019	0.0309576	1.32015	0.0217365
						694	1.8678	0.0307535	1.32246	0.0217745
						695	1.87008	0.0307911	1.32261	0.021777
						696	1.86813	0.030759	1.3311	0.0219168
						697	1.84786	0.0304253	1.32137	0.0217565
						698	1.83889	0.0302776	1.32454	0.0218087
						699	1.82293	0.0300149	1.32726	0.0218535
						700	1.82597	0.0300648	1.32814	0.0218681
