# Supplementary material for: A green lifetime biosensor for calcium that remains bright over its full dynamic range
Source: eLife. 2025 Dec 19;14:RP105086. doi: 10.7554/eLife.105086 (PMC12716836; doi:10.7554/eLife.105086)
Supplement: Figure 2—source data 1. [file elife-105086-fig2-data1.xlsx]

## Sheet: figure2
G-Ca-FLITS								mTurquoise2-T203Y
high calcium				low calcium				(low calcium)
pH	phase lifetime (ns)	sd		pH	phase lifetime (ns)	sd		pH	phase lifetime (ns)	sd
2.765	1.274	0.632		2.88	1.041	0.43		2.88	0.967	0.088
2.765	1.134	0.102		2.88	1.084	0.18		2.88	0.97	0.089
2.765	1.105	0.165		2.88	1.081	0.116		2.88	0.95	0.089
3.535	1.166	0.429		3.6	1.253	0.093		3.6	3.112	0.053
3.535	1.193	0.089		3.6	1.241	0.089		3.6	3.109	0.052
3.535	1.223	0.09		3.6	1.266	0.09		3.6	2.992	0.051
3.995	2.526	0.059		3.99	2.475	0.065		3.99	3.282	0.051
3.995	2.618	0.061		3.99	2.542	0.07		3.99	3.323	0.054
3.995	2.567	0.06		3.99	2.53	0.069		3.99	3.331	0.054
4.48	2.581	0.075		4.515	2.822	0.094		4.515	2.909	0.049
4.48	2.606	0.077		4.515	2.77	0.093		4.515	2.871	0.041
4.48	2.647	0.078		4.515	2.788	0.094		4.515	2.861	0.042
5.2	3.008	0.072		5.195	3.056	0.079		5.195	2.192	0.028
5.2	2.945	0.076		5.195	3.156	0.082		5.195	2.221	0.028
5.2	2.975	0.071		5.195	3.1	0.081		5.195	2.202	0.027
5.59	3.154	0.064		5.49	3.331	0.069		5.49	2.025	0.024
5.59	3.16	0.061		5.49	3.402	0.063		5.49	2.015	0.024
5.59	3.156	0.061		5.49	3.312	0.068		5.49	2.008	0.024
5.8	3.207	0.053		5.815	3.384	0.058		5.815	1.921	0.023
5.8	3.221	0.051		5.815	3.428	0.056		5.815	1.916	0.023
5.8	3.222	0.051		5.815	3.425	0.057		5.815	1.919	0.023
6.335	2.24	0.027		6.385	3.392	0.044		6.385	1.783	0.022
6.335	2.231	0.026		6.385	3.402	0.044		6.385	1.795	0.022
6.335	2.227	0.026		6.385	3.4	0.044		6.385	1.787	0.022
6.875	2.106	0.025		6.86	3.455	0.042		6.86	1.894	0.022
6.875	2.103	0.026		6.86	3.493	0.043		6.86	1.891	0.021
6.875	2.105	0.026		6.86	3.483	0.041		6.86	1.877	0.022
7.39	2.046	0.026		7.375	3.512	0.041		7.375	1.918	0.022
7.39	2.044	0.025		7.375	3.526	0.041		7.375	1.92	0.022
7.39	2.043	0.025		7.375	3.526	0.041		7.375	1.918	0.022
7.875	2.015	0.026		7.89	3.522	0.041		7.89	1.904	0.022
7.875	2.015	0.025		7.89	3.514	0.04		7.89	1.9	0.022
7.875	2.018	0.026		7.89	3.52	0.04		7.89	1.895	0.022
8.225	1.976	0.025		8.4	3.522	0.042		8.4	1.899	0.022
8.225	1.979	0.026		8.4	3.535	0.04		8.4	1.901	0.022
8.225	1.979	0.024		8.4	3.511	0.042		8.4	1.898	0.022
8.675	1.978	0.026		8.92	3.512	0.043		8.92	1.881	0.022
8.675	1.977	0.025		8.92	3.529	0.04		8.92	1.88	0.022
8.675	1.975	0.026		8.92	3.524	0.043		8.92	1.877	0.022
9.17	1.975	0.025		9.45	3.561	0.041		9.45	1.871	0.022
9.17	1.977	0.024		9.45	3.561	0.04		9.45	1.871	0.022
9.17	1.976	0.024		9.45	3.541	0.041		9.45	1.869	0.022
9.61	1.987	0.025		10.065	3.618	0.042		10.065	1.845	0.022
9.61	1.988	0.025		10.065	3.613	0.043		10.065	1.844	0.021
9.61	1.99	0.025		10.065	3.611	0.042		10.065	1.841	0.022
