# Supplementary material for: A green lifetime biosensor for calcium that remains bright over its full dynamic range
Source: eLife. 2025 Dec 19;14:RP105086. doi: 10.7554/eLife.105086 (PMC12716836; doi:10.7554/eLife.105086)
Supplement: Figure 3—source data 1. [file elife-105086-fig3-data1.xlsx]

## Sheet: figure3 and S9A-C
Free Ca2+ (uM)	tphi (ns) (figure S9)	tmod (ns) (figure S9)	G	S	M	Phi	line fraction (figure S9)	Fraction
0	2.9748	3.4999	0.601362	0.449607	0.750855	0.641995	0.00458663	0.00547927
0	2.9961	3.5126	0.598869	0.45095	0.749667	0.64542	-0.0108203	-0.0129652
0	2.9728	3.4979	0.601657	0.449525	0.751042	0.641672	0.00623366	0.00744444
0.0104766	2.9617	3.4995	0.602341	0.448357	0.750892	0.639879	0.0122976	0.0146688
0.0104766	2.9631	3.4977	0.602375	0.448594	0.751061	0.640106	0.0119215	0.0142212
0.0104766	2.9741	3.5109	0.600588	0.448924	0.749826	0.641882	0.00232458	0.00277821
0.0235724	2.9228	3.4733	0.607142	0.445994	0.753347	0.633559	0.0414606	0.0491751
0.0235724	2.9275	3.476	0.606596	0.446309	0.753094	0.634326	0.0380361	0.0451434
0.0235724	2.9332	3.477	0.606105	0.446817	0.753	0.635254	0.0344481	0.0409135
0.0404098	2.8757	3.4429	0.612886	0.442959	0.756202	0.625827	0.0768359	0.090511
0.0404098	2.8992	3.4533	0.610378	0.444751	0.755225	0.629695	0.0603206	0.0712833
0.0404098	2.9098	3.4655	0.608679	0.445135	0.754079	0.631433	0.0510356	0.0604194
0.0628597	2.8307	3.4018	0.619332	0.440613	0.760074	0.618358	0.114105	0.133454
0.0628597	2.8325	3.4069	0.618808	0.44052	0.759593	0.618658	0.111723	0.130728
0.0628597	2.8303	3.4022	0.619331	0.44055	0.760036	0.618291	0.114243	0.133612
0.0942895	2.7457	3.331	0.631094	0.435499	0.766772	0.60403	0.184018	0.21238
0.0942895	2.748	3.334	0.630689	0.435584	0.766487	0.604422	0.18182	0.209931
0.0942895	2.7207	3.3168	0.63406	0.433562	0.768119	0.599761	0.203129	0.233594
0.141434	2.5731	3.1846	0.655584	0.42396	0.780725	0.574045	0.331622	0.372354
0.141434	2.5883	3.1973	0.653422	0.425058	0.77951	0.576734	0.318413	0.358392
0.141434	2.5845	3.1949	0.6539	0.424745	0.779739	0.576063	0.321495	0.361656
0.220009	2.422	3.021	0.680317	0.414119	0.796446	0.546803	0.476547	0.521198
0.220009	2.4248	3.0258	0.679709	0.414228	0.795983	0.547316	0.473291	0.517939
0.220009	2.427	3.028	0.679361	0.414391	0.795771	0.547719	0.471194	0.515838
0.377158	2.227	2.812	0.712613	0.398854	0.816641	0.510265	0.671312	0.709478
0.377158	2.216	2.805	0.714044	0.397681	0.817318	0.508157	0.681078	0.718585
0.377158	2.213	2.795	0.715118	0.39774	0.818285	0.507581	0.686258	0.723404
0.579207	2.106	2.658	0.734929	0.388995	0.831527	0.486808	0.804316	0.830927
0.579207	2.109	2.665	0.734103	0.389111	0.830852	0.487397	0.799961	0.827037
0.579207	2.11	2.678	0.732918	0.388667	0.829596	0.487593	0.795111	0.822699
0.848605	2.05	2.591	0.744929	0.383803	0.837988	0.47575	0.865685	0.885142
0.848605	2.038	2.581	0.7467	0.382463	0.838951	0.473364	0.877514	0.895465
0.848605	2.044	2.577	0.746585	0.383531	0.839336	0.474558	0.874504	0.892842
1.7915	1.969	2.48	0.760611	0.376399	0.848649	0.45953	0.96024	0.96653
1.7915	1.972	2.4951	0.759087	0.376217	0.847203	0.460136	0.953115	0.960485
1.7915	1.984	2.498	0.757926	0.377928	0.846925	0.462554	0.943455	0.952268
3.67729	1.94	2.441	0.76616	0.373561	0.852378	0.453658	0.994197	0.995142
3.67729	1.947	2.452	0.764685	0.374187	0.851327	0.455079	0.985464	0.987814
3.67729	1.948	2.451	0.764695	0.374384	0.851423	0.455282	0.985062	0.987476
39	1.935	2.433	0.767226	0.373116	0.853142	0.452643	1.00049	1.00041
39	1.936	2.438	0.766721	0.373063	0.852665	0.452846	0.998111	0.998419
39	1.9338	2.4329	0.767325	0.372933	0.853151	0.452399	1.0014	1.00117
