# Supplementary material for: A green lifetime biosensor for calcium that remains bright over its full dynamic range
Source: eLife. 2025 Dec 19;14:RP105086. doi: 10.7554/eLife.105086 (PMC12716836; doi:10.7554/eLife.105086)
Supplement: Figure 4—source data 1. [file elife-105086-fig4-data1.xlsx]

## Sheet: figure4
construct	glass	state	cell	GFP	RFP	norm_ratio	day
G-Ca-FLITS	g1	post	1	1278.12	2162.81	0.269879	1
G-Ca-FLITS	g1	post	3	1348.13	2248.61	0.273895	1
G-Ca-FLITS	g1	post	4	7603.05	13978.3	0.247886	1
G-Ca-FLITS	g1	post	5	2602.33	4542.77	0.261415	1
G-Ca-FLITS	g1	post	6	6293.41	10836.1	0.265123	1
G-Ca-FLITS	g1	post	8	898.555	1376.18	0.298862	1
G-Ca-FLITS	g1	post	9	2781.22	4880.76	0.260004	1
G-Ca-FLITS	g1	post	10	1805.24	3045.69	0.270706	1
G-Ca-FLITS	g1	post	11	4517.81	7535.89	0.273879	1
G-Ca-FLITS	g1	post	12	1256.46	1950.81	0.294718	1
G-Ca-FLITS	g1	post	13	1447.03	2326.44	0.284394	1
G-Ca-FLITS	g1	post	14	1782.14	2933	0.277671	1
G-Ca-FLITS	g1	post	15	1229.49	1956.78	0.287355	1
G-Ca-FLITS	g1	post	16	1358.28	2238.25	0.277312	1
G-Ca-FLITS	g1	post	17	1175.81	1839.54	0.292433	1
G-Ca-FLITS	g1	post	18	1292.79	2046.44	0.288946	1
G-Ca-FLITS	g1	post	20	1357.45	2366.08	0.261817	1
G-Ca-FLITS	g1	post	21	2871.75	4863.82	0.269636	1
G-Ca-FLITS	g1	post	22	1456.84	2469.95	0.269352	1
G-Ca-FLITS	g1	post	23	3182.01	5013.15	0.290352	1
G-Ca-FLITS	g1	post	24	948.928	1568.73	0.276402	1
G-Ca-FLITS	g1	post	25	1095.36	1724.07	0.290632	1
G-Ca-FLITS	g1	post	26	2044.77	3390.95	0.275517	1
G-Ca-FLITS	g1	post	27	1301.36	2095.76	0.283907	1
G-Ca-FLITS	g1	post	28	2506.94	3807.38	0.301438	1
G-Ca-FLITS	g1	post	29	1513.84	2403.62	0.288054	1
G-Ca-FLITS	g1	post	30	1395.74	2403.82	0.265054	1
G-Ca-FLITS	g1	post	32	4300.45	7354.98	0.266955	1
G-Ca-FLITS	g1	post	33	2169.03	3785.42	0.261483	1
G-Ca-FLITS	g1	post	34	1518.3	2594.09	0.267232	1
G-Ca-FLITS	g1	post	35	1288.78	2082.99	0.282862	1
G-Ca-FLITS	g1	post	36	1134.76	1873.75	0.276733	1
G-Ca-FLITS	g1	post	37	2465.49	4171.59	0.269911	1
G-Ca-FLITS	g1	post	38	1113.5	1715.26	0.297105	1
G-Ca-FLITS	g1	post	39	3185.61	5176.02	0.281337	1
G-Ca-FLITS	g1	post	40	2837.69	4757.41	0.272464	1
G-Ca-FLITS	g1	post	41	919.881	1447.46	0.290717	1
G-Ca-FLITS	g1	post	43	1274.7	1786.97	0.327103	1
G-Ca-FLITS	g1	post	44	1535.67	2590.93	0.270701	1
G-Ca-FLITS	g1	post	45	1620.58	2803.56	0.263844	1
G-Ca-FLITS	g1	post	46	1056.57	1625.42	0.297506	1
G-Ca-FLITS	g1	post	48	1780.24	2893.64	0.28123	1
G-Ca-FLITS	g1	post	49	5208.13	9373.19	0.253367	1
G-Ca-FLITS	g1	post	50	1651.58	2790.76	0.270278	1
G-Ca-FLITS	g1	post	51	1728.29	2857.14	0.276402	1
G-Ca-FLITS	g1	post	52	922.974	1434.07	0.294499	1
G-Ca-FLITS	g1	post	53	758.321	1277.99	0.271011	1
G-Ca-FLITS	g1	post	54	1119.17	1654.45	0.309864	1
G-Ca-FLITS	g1	post	55	2327.39	4005.11	0.265274	1
G-Ca-FLITS	g1	pre	1	1611.83	2122.65	0.355688	1
G-Ca-FLITS	g1	pre	2	1864.16	2784.89	0.312332	1
G-Ca-FLITS	g1	pre	3	1453.23	2292.93	0.295177	1
G-Ca-FLITS	g1	pre	4	7516.86	13992.5	0.248634	1
G-Ca-FLITS	g1	pre	5	3892.54	4650.32	0.393131	1
G-Ca-FLITS	g1	pre	6	8838.77	10429	0.398176	1
G-Ca-FLITS	g1	pre	9	1225.34	1335.35	0.431958	1
G-Ca-FLITS	g1	pre	10	4047.38	5037.27	0.376957	1
G-Ca-FLITS	g1	pre	11	2612.72	3118.15	0.393546	1
G-Ca-FLITS	g1	pre	12	5527.9	7921.98	0.326023	1
G-Ca-FLITS	g1	pre	13	1341.33	1928.14	0.324994	1
G-Ca-FLITS	g1	pre	14	2149.09	2444.52	0.413419	1
G-Ca-FLITS	g1	pre	15	2620.86	2989.66	0.412212	1
G-Ca-FLITS	g1	pre	16	1680.76	1914.26	0.412878	1
G-Ca-FLITS	g1	pre	17	10348.4	11692.4	0.416264	1
G-Ca-FLITS	g1	pre	18	1687.18	2187.59	0.361423	1
G-Ca-FLITS	g1	pre	19	1641.8	1801.69	0.428894	1
G-Ca-FLITS	g1	pre	20	4507.51	4984.36	0.425556	1
G-Ca-FLITS	g1	pre	21	1821.06	2023.31	0.423488	1
G-Ca-FLITS	g1	pre	23	1895.05	2319.77	0.383429	1
G-Ca-FLITS	g1	pre	24	4145.47	4895.61	0.397818	1
G-Ca-FLITS	g1	pre	25	2016.19	2404.04	0.393911	1
G-Ca-FLITS	g1	pre	26	4538.08	5019.3	0.425457	1
G-Ca-FLITS	g1	pre	27	1046.6	1505.58	0.324747	1
G-Ca-FLITS	g1	pre	28	1550.72	1688.66	0.432294	1
G-Ca-FLITS	g1	pre	29	2885.51	3345.88	0.405353	1
G-Ca-FLITS	g1	pre	30	1843.12	2095.43	0.413633	1
G-Ca-FLITS	g1	pre	31	3234.9	3510.83	0.433786	1
G-Ca-FLITS	g1	pre	32	1970.87	2290.21	0.404464	1
G-Ca-FLITS	g1	pre	33	1335.79	2280.45	0.272031	1
G-Ca-FLITS	g1	pre	34	2861.34	3136.92	0.429324	1
G-Ca-FLITS	g1	pre	35	5759.38	6816.06	0.396951	1
G-Ca-FLITS	g1	pre	36	3229.15	3923.56	0.386368	1
G-Ca-FLITS	g1	pre	37	1656.83	2143.39	0.362263	1
G-Ca-FLITS	g1	pre	38	2413.05	2819.21	0.402231	1
G-Ca-FLITS	g1	pre	39	1665.22	1912.91	0.409261	1
G-Ca-FLITS	g1	pre	40	3873.15	5070.46	0.357864	1
G-Ca-FLITS	g1	pre	41	1631.14	1853.88	0.41376	1
G-Ca-FLITS	g1	pre	42	4347.11	4764.7	0.429424	1
G-Ca-FLITS	g1	pre	43	3973.3	4619.61	0.404238	1
G-Ca-FLITS	g1	pre	44	1260.42	1405	0.42207	1
G-Ca-FLITS	g1	pre	46	1219.8	1642.77	0.347581	1
G-Ca-FLITS	g1	pre	47	1618.96	1621.05	0.471041	1
G-Ca-FLITS	g1	pre	48	2183.07	2569.15	0.399241	1
G-Ca-FLITS	g1	pre	49	2251.95	2663.91	0.397135	1
G-Ca-FLITS	g1	pre	50	1918.85	2658.06	0.337639	1
G-Ca-FLITS	g1	pre	51	7987.34	10314.5	0.362931	1
G-Ca-FLITS	g1	pre	52	1840.85	2524.98	0.341088	1
G-Ca-FLITS	g1	pre	53	2263.38	3014.38	0.351596	1
G-Ca-FLITS	g1	pre	54	944.611	1388.81	0.317525	1
G-Ca-FLITS	g1	pre	55	1086.2	1322.03	0.385695	1
G-Ca-FLITS	g1	pre	56	1400.57	1613.93	0.407952	1
G-Ca-FLITS	g1	pre	57	1568.48	1984.36	0.370662	1
G-Ca-FLITS	g1	pre	58	3042.26	4146.79	0.343299	1
G-Ca-FLITS	g2	post	1	2694.35	3762.2	0.328984	1
G-Ca-FLITS	g2	post	2	1946.05	2920.3	0.305598	1
G-Ca-FLITS	g2	post	3	987.058	1586.4	0.284839	1
G-Ca-FLITS	g2	post	4	1010.71	1378.67	0.336945	1
G-Ca-FLITS	g2	post	5	1070.97	1715.21	0.28587	1
G-Ca-FLITS	g2	post	8	1397.08	2307.42	0.27698	1
G-Ca-FLITS	g2	post	10	2883.65	4185.63	0.316196	1
G-Ca-FLITS	g2	post	11	937.597	1479.5	0.290253	1
G-Ca-FLITS	g2	post	12	1851.45	2880.8	0.294464	1
G-Ca-FLITS	g2	post	15	995.247	1448.63	0.315295	1
G-Ca-FLITS	g2	post	16	1099.93	1559.18	0.323952	1
G-Ca-FLITS	g2	post	17	5096.92	7674.49	0.304542	1
G-Ca-FLITS	g2	post	18	1723.92	2707.47	0.291664	1
G-Ca-FLITS	g2	post	19	920.828	1481.51	0.284533	1
G-Ca-FLITS	g2	post	20	1390.33	2135.4	0.298411	1
G-Ca-FLITS	g2	post	21	1197.32	1790.21	0.306738	1
G-Ca-FLITS	g2	post	22	1778.01	2806.06	0.290211	1
G-Ca-FLITS	g2	post	23	1503.78	2388.4	0.288324	1
G-Ca-FLITS	g2	post	24	1233.34	2041.34	0.276375	1
G-Ca-FLITS	g2	post	25	5100.5	7889.2	0.296264	1
G-Ca-FLITS	g2	post	26	5427.53	9172.77	0.27051	1
G-Ca-FLITS	g2	post	27	1356.77	2171.67	0.286042	1
G-Ca-FLITS	g2	post	28	7761.91	10802.3	0.330102	1
G-Ca-FLITS	g2	post	29	1762.65	2881.55	0.279907	1
G-Ca-FLITS	g2	post	30	1632.38	2413.6	0.310269	1
G-Ca-FLITS	g2	post	31	1858.89	2808.53	0.303478	1
G-Ca-FLITS	g2	post	32	7510.04	12432.2	0.276325	1
G-Ca-FLITS	g2	post	33	5065.42	8192.67	0.283001	1
G-Ca-FLITS	g2	post	34	2444.52	3568.42	0.314365	1
G-Ca-FLITS	g2	post	35	991.142	1507.3	0.301453	1
G-Ca-FLITS	g2	post	36	1476.29	2166.64	0.312639	1
G-Ca-FLITS	g2	post	37	3134.38	4665.73	0.308136	1
G-Ca-FLITS	g2	post	38	1421.3	2271.77	0.286453	1
G-Ca-FLITS	g2	post	39	2115.05	3294.22	0.294165	1
G-Ca-FLITS	g2	post	40	1855.78	3116.91	0.272244	1
G-Ca-FLITS	g2	post	41	1685.73	2394.48	0.323275	1
G-Ca-FLITS	g2	post	42	4412.76	7325.8	0.275518	1
G-Ca-FLITS	g2	post	44	1208.38	1477.47	0.37677	1
G-Ca-FLITS	g2	post	45	1127.95	1716.24	0.301292	1
G-Ca-FLITS	g2	post	46	2073.8	3506.47	0.270378	1
G-Ca-FLITS	g2	post	47	2262.52	3617.66	0.286347	1
G-Ca-FLITS	g2	post	48	1395.72	2155.69	0.296707	1
G-Ca-FLITS	g2	post	49	4914.83	8185.21	0.274622	1
G-Ca-FLITS	g2	post	50	3600.44	5594.61	0.294872	1
G-Ca-FLITS	g2	post	51	1647.53	1790.19	0.424897	1
G-Ca-FLITS	g2	post	52	1430.11	2450.13	0.266746	1
G-Ca-FLITS	g2	post	53	1521.4	2495.38	0.278962	1
G-Ca-FLITS	g2	post	54	2745.76	4729.84	0.265257	1
G-Ca-FLITS	g2	pre	1	2607.78	3782.52	0.33386	1
G-Ca-FLITS	g2	pre	2	2831.02	3100.37	0.445096	1
G-Ca-FLITS	g2	pre	3	1434.87	1557.68	0.449092	1
G-Ca-FLITS	g2	pre	5	1510.28	1373.89	0.53766	1
G-Ca-FLITS	g2	pre	6	1568.5	1714.92	0.445841	1
G-Ca-FLITS	g2	pre	10	1608.19	2308.88	0.337388	1
G-Ca-FLITS	g2	pre	12	1339.76	1476.64	0.442203	1
G-Ca-FLITS	g2	pre	13	4265.84	4282.11	0.486406	1
G-Ca-FLITS	g2	pre	14	2301.22	2838.93	0.394111	1
G-Ca-FLITS	g2	pre	15	2124.37	2270.66	0.45626	1
G-Ca-FLITS	g2	pre	17	1257.51	1431.57	0.427834	1
G-Ca-FLITS	g2	pre	18	1577.51	1546.2	0.498364	1
G-Ca-FLITS	g2	pre	19	7019.42	7263.78	0.471568	1
G-Ca-FLITS	g2	pre	20	1306	1413.09	0.450611	1
G-Ca-FLITS	g2	pre	21	2488.16	2660.72	0.456046	1
G-Ca-FLITS	g2	pre	22	2061.23	2118.11	0.474942	1
G-Ca-FLITS	g2	pre	23	1685.38	1766.25	0.465528	1
G-Ca-FLITS	g2	pre	24	2345.12	2774.53	0.411335	1
G-Ca-FLITS	g2	pre	25	1995.6	2287.94	0.424758	1
G-Ca-FLITS	g2	pre	26	1873.78	2081.02	0.438776	1
G-Ca-FLITS	g2	pre	27	893.594	1354.87	0.318999	1
G-Ca-FLITS	g2	pre	28	7167.58	7853.36	0.444873	1
G-Ca-FLITS	g2	pre	29	8127.61	9382.23	0.421801	1
G-Ca-FLITS	g2	pre	30	1888.94	2175.47	0.422801	1
G-Ca-FLITS	g2	pre	31	1409.28	1389.74	0.495288	1
G-Ca-FLITS	g2	pre	32	9994.24	9990.41	0.488487	1
G-Ca-FLITS	g2	pre	33	2369.46	2646.62	0.436222	1
G-Ca-FLITS	g2	pre	34	2390.06	2407.37	0.48472	1
G-Ca-FLITS	g2	pre	35	2736.85	3066.27	0.434872	1
G-Ca-FLITS	g2	pre	37	2804.67	2912.39	0.469904	1
G-Ca-FLITS	g2	pre	38	11119.8	12470.4	0.434438	1
G-Ca-FLITS	g2	pre	39	7197.85	8022.11	0.437203	1
G-Ca-FLITS	g2	pre	40	3378.51	3459.95	0.476591	1
G-Ca-FLITS	g2	pre	41	1333.8	1423.02	0.457119	1
G-Ca-FLITS	g2	pre	42	2178.87	2197.95	0.483979	1
G-Ca-FLITS	g2	pre	43	1980.94	2214.63	0.435825	1
G-Ca-FLITS	g2	pre	44	3071.64	3317.03	0.451508	1
G-Ca-FLITS	g2	pre	45	2833.72	3258.06	0.42353	1
G-Ca-FLITS	g2	pre	46	2431.01	2409.26	0.492784	1
G-Ca-FLITS	g2	pre	47	6272.78	7412.12	0.41186	1
G-Ca-FLITS	g2	pre	49	1666.85	1457.77	0.559616	1
G-Ca-FLITS	g2	pre	50	1907.72	1862.39	0.500397	1
G-Ca-FLITS	g2	pre	51	1520.55	1609.03	0.460951	1
G-Ca-FLITS	g2	pre	52	3308.71	3714.83	0.433933	1
G-Ca-FLITS	g2	pre	53	3241.89	3591.82	0.439851	1
G-Ca-FLITS	g2	pre	54	2042.51	2163.32	0.460526	1
G-Ca-FLITS	g2	pre	55	6511.34	7763.78	0.408078	1
G-Ca-FLITS	g2	pre	56	5352.63	5674.32	0.460105	1
G-Ca-FLITS	g2	pre	58	2056.54	2476.33	0.403999	1
G-Ca-FLITS	g2	pre	59	2127.76	2515.87	0.411585	1
G-Ca-FLITS	g2	pre	60	4214.8	4900.92	0.418679	1
EGFP	g1	post	1	7875.77	3767.1	0.928131	1
EGFP	g1	post	2	3938.95	1889.37	0.925508	1
EGFP	g1	post	3	6267.41	3169.69	0.877467	1
EGFP	g1	post	4	4122.35	1947.85	0.939614	1
EGFP	g1	post	5	3646.29	1496.32	1.08283	1
EGFP	g1	post	6	4649.21	2030.44	1.0171	1
EGFP	g1	post	7	8576.85	3935.72	0.96771	1
EGFP	g1	post	8	3876.4	1831.56	0.93965	1
EGFP	g1	post	9	27765.1	12221.4	1.00909	1
EGFP	g1	post	10	3183.91	1339.18	1.05632	1
EGFP	g1	post	11	7065.39	3326.84	0.942918	1
EGFP	g1	post	12	3667.24	1649.72	0.987246	1
EGFP	g1	post	13	3215.7	1598.68	0.892737	1
EGFP	g1	post	14	8563.87	4272.76	0.889532	1
EGFP	g1	post	15	9134.75	4133.45	0.98144	1
EGFP	g1	post	16	16474.4	7517.26	0.973211	1
EGFP	g1	post	17	5321.35	2039.46	1.15985	1
EGFP	g1	post	18	3683.21	1852.36	0.882426	1
EGFP	g1	post	19	8953.06	4669.69	0.850641	1
EGFP	g1	post	20	14153.2	6863.42	0.915373	1
EGFP	g1	post	21	12379.1	6313.82	0.870018	1
EGFP	g1	post	22	18825.2	8200.03	1.01978	1
EGFP	g1	post	24	9814.62	4458.69	0.977541	1
EGFP	g1	post	25	14789.7	6128.47	1.0723	1
EGFP	g1	post	27	6512.89	2863.24	1.01035	1
EGFP	g1	post	28	8163.38	3438.77	1.05471	1
EGFP	g1	post	29	5501.73	2855.17	0.854961	1
EGFP	g1	post	30	5841.29	2475.25	1.04844	1
EGFP	g1	post	31	12977.1	5938.3	0.970433	1
EGFP	g1	post	32	9131.54	3086.24	1.31608	1
EGFP	g1	post	33	7262.74	3055.49	1.05607	1
EGFP	g1	post	34	15512.1	6724.2	1.02477	1
EGFP	g1	post	35	3415.17	1443.92	1.05081	1
EGFP	g1	post	36	13945.8	5746.95	1.07828	1
EGFP	g1	post	37	11612.4	5381.93	0.958071	1
EGFP	g1	post	38	2615.06	1339.48	0.866295	1
EGFP	g1	post	39	5106.81	2367.62	0.957746	1
EGFP	g1	post	40	5837.11	2632.36	0.984782	1
EGFP	g1	post	41	2679.37	1330.84	0.893557	1
EGFP	g1	post	42	3220.52	1385.34	1.03272	1
EGFP	g1	post	43	7840.12	3435.65	1.01363	1
EGFP	g1	post	44	11483.5	5059.86	1.00806	1
EGFP	g1	post	45	3886.61	1800.8	0.958339	1
EGFP	g1	post	46	3241.71	1457.22	0.987974	1
EGFP	g1	post	47	4325.8	1938.56	0.991041	1
EGFP	g1	post	48	11960.7	5747.45	0.923827	1
EGFP	g1	post	49	3954.32	1422.41	1.23619	1
EGFP	g1	post	50	6341.08	2445.72	1.15249	1
EGFP	g1	post	51	12325.3	5976.26	0.91549	1
EGFP	g1	post	52	6557.19	2938.47	0.991066	1
EGFP	g1	post	53	4564.98	1985.42	1.02134	1
EGFP	g1	post	54	6674.51	2710.88	1.09413	1
EGFP	g1	post	55	11314.9	5238.71	0.959049	1
EGFP	g1	post	56	3873.52	1653.69	1.04061	1
EGFP	g1	post	57	4851.15	2049.91	1.0514	1
EGFP	g1	post	58	10691.4	5665.89	0.837103	1
EGFP	g1	post	59	19291.9	8988.06	0.95303	1
EGFP	g1	post	60	15702.1	7404.08	0.941568	1
EGFP	g1	post	61	6854.59	2912.19	1.0457	1
EGFP	g1	post	62	5748.95	2468.08	1.03478	1
EGFP	g1	post	63	4386.93	1627.57	1.19837	1
EGFP	g1	post	64	3900.76	1935.05	0.894693	1
EGFP	g1	post	65	12484.5	4227.02	1.31372	1
EGFP	g1	post	66	10964.1	5250.11	0.9271	1
EGFP	g1	post	67	6551.26	2816.45	1.03333	1
EGFP	g1	post	68	5064.79	2154.03	1.0446	1
EGFP	g1	post	69	6916.96	2863.24	1.07342	1
EGFP	g1	post	70	8793.77	3932.47	0.993164	1
EGFP	g1	post	71	6620.25	2842.31	1.03472	1
EGFP	g1	post	72	4795.09	2022.66	1.05327	1
EGFP	g1	post	73	11290.8	4666.97	1.07499	1
EGFP	g1	post	74	3511.09	1676.74	0.929621	1
EGFP	g1	post	75	5917.87	2520.43	1.04311	1
EGFP	g1	post	76	6449.24	2807.27	1.02049	1
EGFP	g1	post	77	4870.94	1609.67	1.34613	1
EGFP	g1	post	78	7082.59	3196.87	0.983905	1
EGFP	g1	post	79	3655.29	1559.02	1.04161	1
EGFP	g1	post	80	9804.73	3781.88	1.15242	1
EGFP	g1	post	81	4706.1	2379.76	0.877584	1
EGFP	g1	post	82	9078.4	4816.2	0.836209	1
EGFP	g1	post	83	10002.1	4339.66	1.02382	1
EGFP	g1	post	84	4227.54	2256.04	0.83125	1
EGFP	g1	post	85	9152.89	4017.21	1.01203	1
EGFP	g1	post	86	6561.84	2831.13	1.02961	1
EGFP	g1	post	87	4996.52	2290.34	0.968752	1
EGFP	g1	post	88	13522.3	5946.09	1.01012	1
EGFP	g1	post	89	5165.69	2413.29	0.95041	1
EGFP	g1	post	90	5055.67	2164.86	1.03747	1
EGFP	g1	post	91	10652.7	5015.48	0.943014	1
EGFP	g1	post	92	7780.89	3898.72	0.885715	1
EGFP	g1	post	93	3469.83	1808.47	0.851259	1
EGFP	g1	post	94	5821.64	2693.45	0.959744	1
EGFP	g1	post	95	7601.03	3345.16	1.00927	1
EGFP	g1	post	96	13072.3	5383.68	1.07894	1
EGFP	g1	post	97	4677.29	2006.48	1.03557	1
EGFP	g1	post	98	4904.02	1780.66	1.22458	1
EGFP	g1	post	99	20842.3	8685.03	1.06627	1
EGFP	g1	post	100	4293.68	1915.82	0.995387	1
EGFP	g1	post	101	3563.54	1460.27	1.08439	1
EGFP	g1	post	102	19221.8	10146.3	0.840447	1
EGFP	g1	post	103	12364.3	5941.38	0.923831	1
EGFP	g1	post	104	2915.88	1306.34	0.991336	1
EGFP	g1	post	105	8670.74	3912.24	0.984279	1
EGFP	g1	post	106	10359	4072.09	1.13067	1
EGFP	g1	post	107	9496.84	4568.84	0.922743	1
EGFP	g1	post	108	9170.61	4497.12	0.905139	1
EGFP	g1	post	109	9547.16	3825.07	1.10924	1
EGFP	g1	post	110	13806	6526.5	0.939171	1
EGFP	g1	post	111	13477.7	6288.27	0.951656	1
EGFP	g1	post	112	7276.81	2907.53	1.11228	1
EGFP	g1	post	113	30153.6	16155.8	0.827921	1
EGFP	g1	post	114	7045.71	3369.03	0.928422	1
EGFP	g1	post	115	5939.1	2684	0.982702	1
EGFP	g1	post	116	8840.15	4011.19	0.97872	1
EGFP	g1	post	117	5057.52	2402.92	0.934419	1
EGFP	g1	post	118	8733.01	4057.75	0.95562	1
EGFP	g1	post	119	5454.6	2349.86	1.03117	1
EGFP	g1	post	120	6821.97	3863.63	0.782903	1
EGFP	g1	post	121	8446.23	3664.99	1.02372	1
EGFP	g1	post	122	20549.6	10858.5	0.839567	1
EGFP	g1	post	123	8475.39	3938.41	0.955531	1
EGFP	g1	post	124	23180	11471.8	0.896826	1
EGFP	g1	post	125	12387.2	5621.05	0.978654	1
EGFP	g1	post	126	5134.88	2010.16	1.13539	1
EGFP	g1	post	127	17387.9	7357.29	1.04999	1
EGFP	g1	post	128	5652.68	2333.98	1.07615	1
EGFP	g1	post	129	6273.25	2049.23	1.36188	1
EGFP	g1	post	130	3753.34	1787.21	0.932349	1
EGFP	g1	post	131	5897.35	3051.18	0.857586	1
EGFP	g1	post	132	4591.8	1876.34	1.08747	1
EGFP	g1	post	134	6314.41	2571	1.0914	1
EGFP	g1	post	135	4855.8	2108.85	1.02283	1
EGFP	g1	post	137	3622.56	1644.28	0.978383	1
EGFP	g1	post	138	3181.51	1516.37	0.93146	1
EGFP	g1	post	139	8790.94	3958.56	0.986259	1
EGFP	g1	post	141	3893.32	1569.27	1.10255	1
EGFP	g1	post	142	4471.54	1871.25	1.06172	1
EGFP	g1	post	143	11957.5	5023.48	1.05757	1
EGFP	g1	post	144	6525.24	2832.44	1.02335	1
EGFP	g1	post	145	8437.34	3849.6	0.973301	1
EGFP	g1	pre	1	7625.2	3562.9	0.96039	1
EGFP	g1	pre	2	4172.07	1957.17	0.956567	1
EGFP	g1	pre	3	5100.45	2813.68	0.812642	1
EGFP	g1	pre	4	3973.35	1906.62	0.935039	1
EGFP	g1	pre	5	3600.53	1492.12	1.08352	1
EGFP	g1	pre	6	3512.71	1469.92	1.073	1
EGFP	g1	pre	7	4483.77	1986.8	1.01301	1
EGFP	g1	pre	9	11535	4277.86	1.2114	1
EGFP	g1	pre	10	3548.77	1693.03	0.94051	1
EGFP	g1	pre	11	8786.37	4037.4	0.976671	1
EGFP	g1	pre	12	28208.5	12093.2	1.04722	1
EGFP	g1	pre	13	3096.27	1320.25	1.05291	1
EGFP	g1	pre	14	7136.6	3374.44	0.94899	1
EGFP	g1	pre	16	3507.75	1615.12	0.974676	1
EGFP	g1	pre	17	3181.58	1620.29	0.88071	1
EGFP	g1	pre	18	8559.25	4274.92	0.898137	1
EGFP	g1	pre	19	15903.1	7284.66	0.979762	1
EGFP	g1	pre	20	3652.35	1957.58	0.836565	1
EGFP	g1	pre	21	5099.78	1970.41	1.16255	1
EGFP	g1	pre	22	8297.64	4297.26	0.865971	1
EGFP	g1	pre	23	14221.9	6863.77	0.929646	1
EGFP	g1	pre	25	18661.2	8191.95	1.02258	1
EGFP	g1	pre	27	3400.58	1349.93	1.13137	1
EGFP	g1	pre	29	13960.6	5788.67	1.08292	1
EGFP	g1	pre	31	6760.06	2952.21	1.02792	1
EGFP	g1	pre	32	7929.66	3389.78	1.05024	1
EGFP	g1	pre	33	13470.2	6957.09	0.868347	1
EGFP	g1	pre	34	5461.42	2837.41	0.863208	1
EGFP	g1	pre	35	5969.36	2547.64	1.05196	1
EGFP	g1	pre	36	13353.1	6129.72	0.977651	1
EGFP	g1	pre	37	9157.8	3046.35	1.35115	1
EGFP	g1	pre	38	7131.62	3017.1	1.06127	1
EGFP	g1	pre	39	15589.8	6756.57	1.03583	1
EGFP	g1	pre	40	3401.68	1441	1.05988	1
EGFP	g1	pre	41	13666.2	5643.97	1.08729	1
EGFP	g1	pre	43	2495.91	1305.04	0.857666	1
EGFP	g1	pre	44	5239.16	2454.98	0.957652	1
EGFP	g1	pre	45	5806.04	2633.01	0.989691	1
EGFP	g1	pre	46	2594.01	1296.52	0.89748	1
EGFP	g1	pre	47	3891.13	1896.74	0.920374	1
EGFP	g1	pre	48	3525.45	1427.1	1.10938	1
EGFP	g1	pre	49	3090.76	1329.42	1.04374	1
EGFP	g1	pre	50	7695.41	3424.06	1.0088	1
EGFP	g1	pre	51	10878.9	4894.52	0.997618	1
EGFP	g1	pre	52	3484.09	1630.89	0.95865	1
EGFP	g1	pre	53	3175.63	1444.03	0.987004	1
EGFP	g1	pre	54	4165.7	1898.58	0.984734	1
EGFP	g1	pre	55	12023.7	5820.15	0.926872	1
EGFP	g1	pre	56	3842.99	1396.74	1.2362	1
EGFP	g1	pre	57	6181.14	2415.47	1.14937	1
EGFP	g1	pre	58	12740.1	6196.18	0.922471	1
EGFP	g1	pre	59	6862.32	3079.98	1.00004	1
EGFP	g1	pre	60	4210.44	1836.94	1.02894	1
EGFP	g1	pre	61	14873.8	6075.16	1.09943	1
EGFP	g1	pre	62	6363.62	2623.32	1.08927	1
EGFP	g1	pre	63	3802.96	1638.49	1.042	1
EGFP	g1	pre	64	4852.76	2068.49	1.05329	1
EGFP	g1	pre	65	10747.8	5675.86	0.849135	1
EGFP	g1	pre	66	19201.2	9076.14	0.949294	1
EGFP	g1	pre	67	15835.2	7518.88	0.945002	1
EGFP	g1	pre	68	6810.57	2911.17	1.05032	1
EGFP	g1	pre	69	5926.97	2564.68	1.03748	1
EGFP	g1	pre	70	4342.49	1641.71	1.18823	1
EGFP	g1	pre	71	3765.22	1883.15	0.896885	1
EGFP	g1	pre	72	25276.6	13260.4	0.85481	1
EGFP	g1	pre	73	12275.1	4214.66	1.30889	1
EGFP	g1	pre	74	10778.9	5213.73	0.927555	1
EGFP	g1	pre	75	6057.41	2664.88	1.02035	1
EGFP	g1	pre	76	34829	17689.5	0.883114	1
EGFP	g1	pre	77	4436.7	2083.63	0.955492	1
EGFP	g1	pre	78	4855.72	2098.26	1.03891	1
EGFP	g1	pre	79	6871.43	2876.04	1.07276	1
EGFP	g1	pre	80	8249	3592.11	1.0309	1
EGFP	g1	pre	81	6753.39	2847.41	1.0649	1
EGFP	g1	pre	82	4501.29	1930.93	1.04657	1
EGFP	g1	pre	83	3428.34	1654.26	0.92983	1
EGFP	g1	pre	84	5889.87	2539.26	1.04132	1
EGFP	g1	pre	85	5928.07	2605.02	1.02152	1
EGFP	g1	pre	86	4438.12	1491.1	1.33773	1
EGFP	g1	pre	87	11072.5	4703.5	1.05693	1
EGFP	g1	pre	88	3471.87	1513.12	1.03004	1
EGFP	g1	pre	89	9492.76	3699.77	1.15244	1
EGFP	g1	pre	90	3480.66	1510.16	1.03469	1
EGFP	g1	pre	91	4439.2	2267.55	0.878062	1
EGFP	g1	pre	92	7490.04	2961.13	1.13605	1
EGFP	g1	pre	93	19639.7	10215.8	0.862167	1
EGFP	g1	pre	94	9712.73	5283.03	0.82426	1
EGFP	g1	pre	95	9933.99	4340.74	1.02734	1
EGFP	g1	pre	96	4133.87	2229.71	0.83126	1
EGFP	g1	pre	97	9495.68	4167.42	1.02283	1
EGFP	g1	pre	98	16770.4	7922.41	0.949863	1
EGFP	g1	pre	99	6501.61	2836.7	1.02889	1
EGFP	g1	pre	100	4626.88	2135.11	0.972519	1
EGFP	g1	pre	101	4731.93	2235.7	0.949727	1
EGFP	g1	pre	102	4993.13	2162.48	1.03656	1
EGFP	g1	pre	103	7775.93	3965.94	0.8794	1
EGFP	g1	pre	104	10379.6	4854.76	0.959421	1
EGFP	g1	pre	105	3338.65	1773.22	0.844269	1
EGFP	g1	pre	106	7544.33	3395.41	0.997279	1
EGFP	g1	pre	107	12941.8	5440.6	1.06804	1
EGFP	g1	pre	108	4419.71	1927.77	1.0292	1
EGFP	g1	pre	109	12379.2	5601.84	0.991835	1
EGFP	g1	pre	110	4572.12	1681.24	1.2218	1
EGFP	g1	pre	111	2632.8	1395.41	0.846047	1
EGFP	g1	pre	112	3334.63	1430.68	1.04641	1
EGFP	g1	pre	113	21474.9	9016.21	1.06943	1
EGFP	g1	pre	114	4274.58	1923.33	0.997538	1
EGFP	g1	pre	116	12146.5	5928.33	0.919206	1
EGFP	g1	pre	117	16244.7	8249.37	0.883249	1
EGFP	g1	pre	118	2730.8	1240.66	0.987881	1
EGFP	g1	pre	119	8647.17	3955.32	0.981169	1
EGFP	g1	pre	120	10341.1	4124.45	1.12604	1
EGFP	g1	pre	121	9573.4	4740.4	0.905957	1
EGFP	g1	pre	122	9094.86	4370.05	0.933775	1
EGFP	g1	pre	123	6186.58	2979.72	0.93154	1
EGFP	g1	pre	124	13560.3	6335.13	0.960541	1
EGFP	g1	pre	125	9941.16	3990.09	1.11891	1
EGFP	g1	pre	126	14307.9	6749.1	0.951279	1
EGFP	g1	pre	127	7183.84	2869.05	1.12452	1
EGFP	g1	pre	128	31532.4	16525.1	0.855698	1
EGFP	g1	pre	129	5721.87	2649.87	0.969027	1
EGFP	g1	pre	130	7009.07	3380.98	0.930123	1
EGFP	g1	pre	131	8958.47	4124.16	0.974842	1
EGFP	g1	pre	132	5096.97	2327.66	0.982759	1
EGFP	g1	pre	133	8630.96	4118.89	0.940218	1
EGFP	g1	pre	134	6797.62	3886.79	0.783841	1
EGFP	g1	pre	135	8667.86	3744.13	1.0393	1
EGFP	g1	pre	136	20612.3	10772	0.858113	1
EGFP	g1	pre	137	8281.59	3934.66	0.944424	1
EGFP	g1	pre	138	21664.8	10801.6	0.899719	1
EGFP	g1	pre	139	14605.2	6388	1.02635	1
EGFP	g1	pre	140	5356.61	2105.39	1.14272	1
EGFP	g1	pre	141	18220.4	8752.29	0.934049	1
EGFP	g1	pre	142	17897.6	7756.45	1.03587	1
EGFP	g1	pre	143	5209.92	2190.44	1.06792	1
EGFP	g1	pre	144	6168.47	2046.43	1.35481	1
EGFP	g1	pre	145	3354.89	1448.89	1.0395	1
EGFP	g1	pre	146	3273.37	1582.63	0.927964	1
EGFP	g1	pre	147	6220.04	3214.44	0.867827	1
EGFP	g1	pre	148	4643.86	1974.07	1.05617	1
EGFP	g1	pre	149	4867.18	3091.8	0.70502	1
EGFP	g1	pre	150	6171.36	2535.22	1.09309	1
EGFP	g1	pre	151	5199.63	2286.78	1.02068	1
EGFP	g1	pre	154	3528.63	1619.81	0.977656	1
EGFP	g1	pre	155	4911.19	2241.68	0.983265	1
EGFP	g1	pre	156	3103.6	1500.12	0.928236	1
EGFP	g1	pre	157	8908.4	4072.46	0.981737	1
EGFP	g1	pre	159	3747.87	1528.73	1.10093	1
EGFP	g1	pre	160	3952.79	1711.31	1.03694	1
EGFP	g1	pre	161	11446.9	4908.24	1.04703	1
EGFP	g1	pre	162	6918.07	3014.17	1.03034	1
EGFP	g1	pre	164	8566.13	3954.02	0.972245	1
EGFP	g2	post	1	3567.42	1628.59	1.01784	1
EGFP	g2	post	2	8205.01	3033.4	1.25837	1
EGFP	g2	post	3	18153.6	8333.42	1.01219	1
EGFP	g2	post	4	3442.65	1546.99	1.03416	1
EGFP	g2	post	5	6184.76	2578.48	1.11515	1
EGFP	g2	post	6	5154.78	2255.17	1.06239	1
EGFP	g2	post	7	6344.84	3081.07	0.956492	1
EGFP	g2	post	8	11357.1	5891.07	0.895024	1
EGFP	g2	post	9	3191.19	1469.54	1.00898	1
EGFP	g2	post	10	14237.5	6197.75	1.06774	1
EGFP	g2	post	11	11504.8	5841.65	0.914475	1
EGFP	g2	post	12	4124	2080.51	0.920441	1
EGFP	g2	post	13	6338.54	2909.91	1.01212	1
EGFP	g2	post	14	5845.85	2784.5	0.975253	1
EGFP	g2	post	15	13704.6	7086.17	0.897897	1
EGFP	g2	post	16	18593.4	10402.5	0.829346	1
EGFP	g2	post	17	4151.47	2050.88	0.940098	1
EGFP	g2	post	19	24439.8	13051.6	0.869163	1
EGFP	g2	post	20	9577.44	4364.98	1.01955	1
EGFP	g2	post	21	11088.2	5389.11	0.955658	1
EGFP	g2	post	22	7761.92	4471.92	0.805174	1
EGFP	g2	post	23	5812.52	2758.35	0.978913	1
EGFP	g2	post	24	9006.79	3921.51	1.06753	1
EGFP	g2	post	25	4565.84	1977.04	1.07346	1
EGFP	g2	post	26	21374.9	10010.8	0.991979	1
EGFP	g2	post	27	5625.4	2960.04	0.882211	1
EGFP	g2	post	28	4862.67	2599.76	0.868177	1
EGFP	g2	post	29	10189.5	6189.48	0.763355	1
EGFP	g2	post	30	5177.72	3463.2	0.692652	1
EGFP	g2	post	31	4398.14	2038.81	1.00227	1
EGFP	g2	post	32	16694.3	9285.75	0.834229	1
EGFP	g2	post	33	16372.4	8049.69	0.944624	1
EGFP	g2	post	34	5174.47	2680.75	0.89614	1
EGFP	g2	post	35	10621.9	5222.07	0.944678	1
EGFP	g2	post	36	14960.2	7037.1	0.987635	1
EGFP	g2	post	37	4481.03	2129.22	0.977647	1
EGFP	g2	post	38	23562.8	12057.5	0.907344	1
EGFP	g2	post	39	4066.96	2139.23	0.882533	1
EGFP	g2	post	40	5138.28	2356.26	1.01325	1
EGFP	g2	post	41	4095.04	1664.08	1.14426	1
EGFP	g2	post	42	4864.72	2333.19	0.968511	1
EGFP	g2	post	43	23340.2	11383.8	0.952279	1
EGFP	g2	post	44	4609.89	2216.06	0.966273	1
EGFP	g2	post	45	17484.6	8486.18	0.956986	1
EGFP	g2	post	46	13043.4	5068.78	1.19683	1
EGFP	g2	post	47	5026.17	2552.63	0.914276	1
EGFP	g2	post	49	5018.3	1915.37	1.21869	1
EGFP	g2	post	50	15044.8	7233.06	0.966174	1
EGFP	g2	post	52	20222.3	11265.1	0.832964	1
EGFP	g2	post	53	5725.93	2531.64	1.05116	1
EGFP	g2	post	54	3730.26	1389.44	1.24894	1
EGFP	g2	post	55	4322.38	2314.48	0.866822	1
EGFP	g2	post	56	15865.1	8902.36	0.826884	1
EGFP	g2	post	57	2789.73	1389.56	0.932334	1
EGFP	g2	post	58	2693.2	1419.37	0.880814	1
EGFP	g2	post	59	12916.8	6211.24	0.965976	1
EGFP	g2	post	60	5203.12	2772.13	0.87122	1
EGFP	g2	post	61	6652.4	3162.96	0.977031	1
EGFP	g2	post	62	14561.2	6679.8	1.01288	1
EGFP	g2	post	63	4169.92	1749.69	1.10797	1
EGFP	g2	post	64	5755.81	3032.45	0.881101	1
EGFP	g2	post	65	18084.3	8170.36	1.02855	1
EGFP	g2	post	66	6999.07	3446.99	0.943019	1
EGFP	g2	post	67	6842.84	2703.09	1.17729	1
EGFP	g2	post	68	6965.36	2777.59	1.16617	1
EGFP	g2	post	69	9645.04	4635.54	0.966485	1
EGFP	g2	post	70	5755.35	2736.74	0.976923	1
EGFP	g2	post	71	5899.25	2944.5	0.93039	1
EGFP	g2	post	72	18321.3	9688.39	0.87782	1
EGFP	g2	post	73	13094.2	6392.06	0.951443	1
EGFP	g2	post	74	12010.7	5707.27	0.977609	1
EGFP	g2	post	75	3821.2	1505.03	1.18078	1
EGFP	g2	post	76	18292.3	8694.29	0.97737	1
EGFP	g2	post	77	8375.25	3365.4	1.15725	1
EGFP	g2	post	78	14631.1	6621.71	1.02676	1
EGFP	g2	post	79	7957.75	3835.08	0.963828	1
EGFP	g2	post	80	3126.05	1635.08	0.887549	1
EGFP	g2	post	81	9309.95	4619.93	0.935857	1
EGFP	g2	post	83	3528.41	1806.1	0.907069	1
EGFP	g2	post	84	5361.08	2554.85	0.974774	1
EGFP	g2	post	85	9558.88	4189.45	1.06047	1
EGFP	g2	post	86	4760.29	1950.18	1.13496	1
EGFP	g2	post	87	13600.5	5680.08	1.1132	1
EGFP	g2	post	88	8481.44	4087	0.963938	1
EGFP	g2	post	89	18101.8	6793.22	1.23957	1
EGFP	g2	post	90	16715.3	7329.15	1.06	1
EGFP	g2	post	91	4447.9	2048.57	1.00883	1
EGFP	g2	post	92	6644.78	2781.4	1.11067	1
EGFP	g2	post	93	10887.4	5695.36	0.887434	1
EGFP	g2	post	94	7228.27	3442.18	0.975481	1
EGFP	g2	post	95	4566.75	2359.76	0.898489	1
EGFP	g2	post	96	5378.69	2172.96	1.15101	1
EGFP	g2	post	97	2703.12	1555.92	0.805928	1
EGFP	g2	post	98	3947.25	1672.53	1.09713	1
EGFP	g2	post	99	9364.15	3493.86	1.24682	1
EGFP	g2	post	100	6440.84	2730.88	1.09641	1
EGFP	g2	post	101	23175.4	11474.9	0.937954	1
EGFP	g2	post	102	6345.1	2895.28	1.01833	1
EGFP	g2	post	103	4011.08	1927.04	0.96686	1
EGFP	g2	post	104	22193.8	10850.9	0.949961	1
EGFP	g2	post	105	19557.7	8800.34	1.03275	1
EGFP	g2	post	106	3947.42	1638.96	1.11977	1
EGFP	g2	post	107	11985.8	6249.15	0.89041	1
EGFP	g2	post	108	3549.99	1896.98	0.868627	1
EGFP	g2	post	109	13713	6105.29	1.04383	1
EGFP	g2	post	110	4268.59	1849.47	1.07279	1
EGFP	g2	post	111	5497.18	2134.46	1.19784	1
EGFP	g2	post	112	10934.5	5772.53	0.879306	1
EGFP	g2	post	113	9629.21	4467.08	1.00152	1
EGFP	g2	post	114	6202.25	3066.48	0.939329	1
EGFP	g2	post	115	14486.8	7337.01	0.916829	1
EGFP	g2	post	116	10139.4	4898.93	0.961364	1
EGFP	g2	post	118	6008.18	2795.53	0.998533	1
EGFP	g2	post	119	4114.26	1584.36	1.20783	1
EGFP	g2	post	120	11715.8	6088.3	0.893369	1
EGFP	g2	post	121	3725.13	1653.27	1.04715	1
EGFP	g2	post	122	5146.27	2420.81	0.98761	1
EGFP	g2	post	123	15566	7913.72	0.913314	1
EGFP	g2	post	124	5829.89	2371.47	1.14309	1
EGFP	g2	post	125	21698.5	10353.1	0.973584	1
EGFP	g2	post	126	3997.44	1857.14	1.00006	1
EGFP	g2	post	127	4370.94	1857.11	1.09412	1
EGFP	g2	post	128	5272.17	2314.54	1.05869	1
EGFP	g2	post	129	4651.17	2250.35	0.96003	1
EGFP	g2	post	130	4192.08	1482.43	1.31587	1
EGFP	g2	post	131	7713.65	2697.14	1.33088	1
EGFP	g2	post	132	4089.83	1970.46	0.964103	1
EGFP	g2	post	133	2768.12	1392.26	0.923256	1
EGFP	g2	post	134	4391.23	1974.33	1.03359	1
EGFP	g2	post	135	7776.88	3746.67	0.964149	1
EGFP	g2	post	136	16380.5	8115.92	0.937326	1
EGFP	g2	post	137	4817.65	2178.65	1.02757	1
EGFP	g2	post	138	9701.61	4753.73	0.94786	1
EGFP	g2	post	139	19075.5	9014.07	0.983096	1
EGFP	g2	post	140	13883.2	6704.35	0.961855	1
EGFP	g2	post	141	19245.5	9185.54	0.973275	1
EGFP	g2	post	142	9233.56	3707.06	1.15827	1
EGFP	g2	post	143	6669.62	2844.97	1.08979	1
EGFP	g2	post	144	4375.25	2577.41	0.787328	1
EGFP	g2	post	145	7585.72	3827.28	0.920351	1
EGFP	g2	post	146	19984.9	8002.18	1.16137	1
EGFP	g2	post	147	5368.73	2879.55	0.865371	1
EGFP	g2	post	148	7960.46	3482.56	1.06241	1
EGFP	g2	post	149	6556.6	3130.54	0.972904	1
EGFP	g2	post	150	4336.24	1959.4	1.02838	1
EGFP	g2	post	151	9181.45	3870.92	1.10267	1
EGFP	g2	post	152	20298	10306.2	0.914495	1
EGFP	g2	post	153	26571.5	13218.2	0.933544	1
EGFP	g2	post	154	12761	5215.46	1.13767	1
EGFP	g2	post	155	5379.26	2257.19	1.10793	1
EGFP	g2	post	156	5300.01	2185.11	1.12773	1
EGFP	g2	post	157	17348.8	9055.78	0.889378	1
EGFP	g2	post	158	4912.34	2159.51	1.05724	1
EGFP	g2	post	159	5003.93	2154.08	1.0798	1
EGFP	g2	post	160	9632.67	3717.35	1.20525	1
EGFP	g2	post	161	9853.75	4571.37	1.00149	1
EGFP	g2	post	162	7353.18	3149.78	1.08518	1
EGFP	g2	pre	1	3523.43	1644.73	1.02213	1
EGFP	g2	pre	2	8044.27	2999.28	1.28227	1
EGFP	g2	pre	3	17438.6	8483.91	0.980319	1
EGFP	g2	pre	4	3378.43	1526.19	1.05653	1
EGFP	g2	pre	5	4462.65	1907.48	1.11721	1
EGFP	g2	pre	6	5908.33	2566.41	1.0992	1
EGFP	g2	pre	7	4833.72	2187.82	1.05447	1
EGFP	g2	pre	8	6111.73	3047.54	0.956206	1
EGFP	g2	pre	9	11728.3	6260.43	0.892563	1
EGFP	g2	pre	10	12474.5	5824.69	1.02184	1
EGFP	g2	pre	11	2972.08	1416.64	1.00079	1
EGFP	g2	pre	12	11537.3	6121.2	0.898065	1
EGFP	g2	pre	13	3920.63	2054.72	0.909291	1
EGFP	g2	pre	14	6291.39	2930.99	1.02418	1
EGFP	g2	pre	16	15811.4	7891.57	0.955301	1
EGFP	g2	pre	18	3886.63	1959.08	0.945819	1
EGFP	g2	pre	19	24747.3	13405.3	0.879401	1
EGFP	g2	pre	20	7546.35	3527.26	1.02077	1
EGFP	g2	pre	21	9142.11	4321.87	1.00914	1
EGFP	g2	pre	22	10644.1	5476.96	0.926311	1
EGFP	g2	pre	24	5436.18	2628.46	0.986443	1
EGFP	g2	pre	26	21338.5	10836.5	0.938699	1
EGFP	g2	pre	27	4379.91	1941.74	1.07678	1
EGFP	g2	pre	29	4803.12	2635.46	0.868033	1
EGFP	g2	pre	30	5300.05	2854.1	0.884659	1
EGFP	g2	pre	32	5189.5	3514.91	0.701255	1
EGFP	g2	pre	33	4156.68	2025.95	0.978498	1
EGFP	g2	pre	36	5146.66	2679.73	0.915303	1
EGFP	g2	pre	37	10352.7	5160.99	0.956443	1
EGFP	g2	pre	38	14726.6	7052.38	0.996065	1
EGFP	g2	pre	39	4381.07	2112.82	0.989025	1
EGFP	g2	pre	40	4138.96	2152.94	0.91621	1
EGFP	g2	pre	41	4871.63	2334.4	0.995445	1
EGFP	g2	pre	42	3803.41	1608.88	1.129	1
EGFP	g2	pre	43	4498.1	2274.24	0.9429	1
EGFP	g2	pre	44	4299.38	2119.77	0.967178	1
EGFP	g2	pre	45	15863.7	8070.45	0.93702	1
EGFP	g2	pre	46	13351.5	5193.73	1.2286	1
EGFP	g2	pre	47	4939.4	2511.51	0.93753	1
EGFP	g2	pre	48	17085.8	8810.4	0.924313	1
EGFP	g2	pre	49	4799.81	1899.76	1.20732	1
EGFP	g2	pre	50	13827.4	7059.98	0.933603	1
EGFP	g2	pre	51	20276.3	11489.1	0.840243	1
EGFP	g2	pre	52	5698.3	2626.56	1.03526	1
EGFP	g2	pre	53	3415.87	1341.77	1.21661	1
EGFP	g2	pre	54	4134.41	2296.63	0.85729	1
EGFP	g2	pre	55	4131.44	2277.23	0.864054	1
EGFP	g2	pre	56	15715.9	8973.48	0.833759	1
EGFP	g2	pre	57	2663.79	1359.99	0.933669	1
EGFP	g2	pre	58	2583.04	1374.07	0.89567	1
EGFP	g2	pre	59	12157.8	6307.04	0.91871	1
EGFP	g2	pre	60	6428.77	3199.83	0.957959	1
EGFP	g2	pre	62	13494.7	6590.78	0.976472	1
EGFP	g2	pre	63	3900.67	1711	1.08839	1
EGFP	g2	pre	64	5634.93	3116.77	0.861018	1
EGFP	g2	pre	65	17703.9	8453.41	0.999015	1
EGFP	g2	pre	66	6666.67	3482.62	0.912259	1
EGFP	g2	pre	67	6780.08	2783.32	1.16368	1
EGFP	g2	pre	68	6641.95	2691.62	1.17894	1
EGFP	g2	pre	69	9091.28	4576.75	0.947024	1
EGFP	g2	pre	70	5344.74	2666.48	0.955704	1
EGFP	g2	pre	71	5885.73	2958.6	0.948449	1
EGFP	g2	pre	73	12524.8	6474.9	0.921943	1
EGFP	g2	pre	74	3274.02	1509.81	1.03478	1
EGFP	g2	pre	75	11561.3	5710.2	0.96547	1
EGFP	g2	pre	76	3774.25	1495.61	1.20588	1
EGFP	g2	pre	77	17278.9	8724.26	0.944207	1
EGFP	g2	pre	78	8096.68	3388.15	1.14138	1
EGFP	g2	pre	79	13839.4	6604.9	0.999509	1
EGFP	g2	pre	80	2925.26	1591.39	0.87559	1
EGFP	g2	pre	81	9354.78	4805.51	0.927877	1
EGFP	g2	pre	82	12055.8	6265.93	0.916961	1
EGFP	g2	pre	83	3343.54	1757.07	0.906786	1
EGFP	g2	pre	84	5172.95	2606.29	0.946245	1
EGFP	g2	pre	85	9484.28	4278.5	1.05802	1
EGFP	g2	pre	86	4633.66	1888.69	1.17206	1
EGFP	g2	pre	87	8113.61	4086.94	0.946468	1
EGFP	g2	pre	88	17235	6757.88	1.2188	1
EGFP	g2	pre	89	4189.64	1799.25	1.11191	1
EGFP	g2	pre	90	16860.2	7377.97	1.09102	1
EGFP	g2	pre	91	4321.49	1960.8	1.05186	1
EGFP	g2	pre	92	7783.56	2642.74	1.40911	1
EGFP	g2	pre	93	10066.5	5431.86	0.882842	1
EGFP	g2	pre	94	5974.16	2604.29	1.09524	1
EGFP	g2	pre	95	7640.91	3619.42	1.00711	1
EGFP	g2	pre	96	4282.6	2313.31	0.881908	1
EGFP	g2	pre	97	5114.73	2165.16	1.12816	1
EGFP	g2	pre	98	2583.77	1514.5	0.811901	1
EGFP	g2	pre	99	3599.97	1579.64	1.08802	1
EGFP	g2	pre	100	9013.36	3519.55	1.2239	1
EGFP	g2	pre	106	22019.7	11341	0.925432	1
EGFP	g2	pre	118	5964.7	2757.72	1.03208	1
EGFP	g2	pre	121	3765.64	1896.17	0.946788	1
EGFP	g2	pre	123	22283.7	10910.2	0.974034	1
EGFP	g2	pre	124	3870.18	1668.31	1.1077	1
EGFP	g2	pre	125	10942.8	5911.46	0.881823	1
EGFP	g2	pre	127	3365.34	1876.76	0.853899	1
EGFP	g2	pre	128	4325.23	1984.99	1.03982	1
EGFP	g2	pre	129	12635.9	5815.23	1.0369	1
EGFP	g2	pre	130	3877.38	1774	1.04305	1
EGFP	g2	pre	131	10179.4	5795.18	0.836247	1
EGFP	g2	pre	132	5399.71	2179.9	1.18347	1
EGFP	g2	pre	135	9352.54	4514.7	0.988068	1
EGFP	g2	pre	136	6206.17	3005.35	0.984918	1
EGFP	g2	pre	137	14191.9	7483.18	0.903699	1
EGFP	g2	pre	138	10124.9	5036.55	0.958535	1
EGFP	g2	pre	140	3551.3	1388.79	1.22206	1
EGFP	g2	pre	141	5825.15	2817.37	0.986145	1
EGFP	g2	pre	143	3936.55	1545.96	1.21687	1
EGFP	g2	pre	144	3475.34	1606.63	1.03218	1
EGFP	g2	pre	145	5018.33	2449.8	0.97693	1
EGFP	g2	pre	146	15614.5	8231.91	0.903855	1
EGFP	g2	pre	147	5461.38	2230.83	1.16954	1
EGFP	g2	pre	148	3511.49	1728.5	0.968769	1
EGFP	g2	pre	149	18692.1	9883.9	0.901124	1
EGFP	g2	pre	150	3948.58	1755.8	1.07351	1
EGFP	g2	pre	151	4899.68	2284.11	1.02351	1
EGFP	g2	pre	152	4508.14	2283.27	0.941249	1
EGFP	g2	pre	153	8087.01	3479.81	1.10971	1
EGFP	g2	pre	154	7216.95	2644.69	1.30482	1
EGFP	g2	pre	155	3760.85	1888.17	0.949619	1
EGFP	g2	pre	156	2725.16	1424.3	0.911806	1
EGFP	g2	pre	157	4022	1881.86	1.01972	1
EGFP	g2	pre	158	7187.3	3685.58	0.929532	1
EGFP	g2	pre	159	16806.2	8860.32	0.903838	1
EGFP	g2	pre	160	4447.05	2047.49	1.03644	1
EGFP	g2	pre	161	9469.74	4767.01	0.947076	1
EGFP	g2	pre	162	9727.95	4920.58	0.942488	1
EGFP	g2	pre	163	18832.4	9305.2	0.965073	1
EGFP	g2	pre	164	12611.9	6835.63	0.878889	1
EGFP	g2	pre	165	8132.85	3361.46	1.15571	1
EGFP	g2	pre	166	6422.39	2909.93	1.05336	1
EGFP	g2	pre	168	4124.91	2518.62	0.779009	1
EGFP	g2	pre	169	7335.69	3844.37	0.909318	1
EGFP	g2	pre	170	18675.6	7956.27	1.12094	1
EGFP	g2	pre	171	4978.42	2774.25	0.854546	1
EGFP	g2	pre	172	7310.23	3566.71	0.977466	1
EGFP	g2	pre	173	6336.36	3279.32	0.92091	1
EGFP	g2	pre	174	4006.81	1910.76	1.00031	1
EGFP	g2	pre	175	8891.52	3891.41	1.09088	1
EGFP	g2	pre	176	19362.5	10062.5	0.917053	1
EGFP	g2	pre	177	26261.6	13407.9	0.933656	1
EGFP	g2	pre	178	12092.6	5214.53	1.10732	1
EGFP	g2	pre	179	5011.85	2207.21	1.08402	1
EGFP	g2	pre	180	5152.72	2200.76	1.11807	1
EGFP	g2	pre	182	16324.9	8788.11	0.884955	1
EGFP	g2	pre	183	4625.62	2078.32	1.06232	1
EGFP	g2	pre	184	8435.19	3455.22	1.16624	1
EGFP	g2	pre	185	7038.08	3112.72	1.07939	1
EGFP	g2	pre	186	8706.57	4315.33	0.962052	1
EGFP	g3	post	1	6799.48	3190.86	0.993662	1
EGFP	g3	post	2	17847.2	7561.23	1.10145	1
EGFP	g3	post	3	32055.9	13922.5	1.07425	1
EGFP	g3	post	4	7388.75	2993.41	1.15219	1
EGFP	g3	post	5	2950.97	1457.3	0.943882	1
EGFP	g3	post	6	4736.28	2227.01	0.9917	1
EGFP	g3	post	7	14165.5	6750.12	0.978453	1
EGFP	g3	post	8	10268.6	4405.72	1.08754	1
EGFP	g3	post	9	4435.45	2159.48	0.957494	1
EGFP	g3	post	10	6334.18	2450.15	1.2071	1
EGFP	g3	post	11	11605.5	5186.52	1.0438	1
EGFP	g3	post	12	5415.56	2563.64	0.984984	1
EGFP	g3	post	13	5546.01	2824.63	0.914979	1
EGFP	g3	post	14	7166.81	3406.48	0.980954	1
EGFP	g3	post	15	5699.97	2423.45	1.09753	1
EGFP	g3	post	16	18054.4	8955.56	0.939666	1
EGFP	g3	post	18	5348.5	2002.66	1.24726	1
EGFP	g3	post	19	10733.7	5553.34	0.900596	1
EGFP	g3	post	20	6183.84	2877.33	1.00223	1
EGFP	g3	post	21	4347.78	1897.92	1.06878	1
EGFP	g3	post	22	9095.96	4205.34	1.00871	1
EGFP	g3	post	23	15818.8	8071.31	0.913303	1
EGFP	g3	post	25	15681	7776.7	0.93986	1
EGFP	g3	post	26	15258.6	7341.68	0.968962	1
EGFP	g3	post	27	9664.65	4404.42	1.02344	1
EGFP	g3	post	28	3743.76	2136.13	0.815916	1
EGFP	g3	post	29	7273.62	3489.86	0.971719	1
EGFP	g3	post	30	18173	8191.12	1.03486	1
EGFP	g3	post	31	6307.45	3110.95	0.945071	1
EGFP	g3	post	32	17667.2	9061.35	0.908533	1
EGFP	g3	post	33	7627.31	4555.78	0.779088	1
EGFP	g3	post	34	5000.59	2316.56	1.00668	1
EGFP	g3	post	35	5487.46	2905.19	0.879932	1
EGFP	g3	post	36	15143.8	6495.09	1.08793	1
EGFP	g3	post	37	6955.51	3312.15	0.979133	1
EGFP	g3	post	38	4323.51	1767.75	1.14158	1
EGFP	g3	post	39	10362.7	4578.78	1.0558	1
EGFP	g3	post	40	5360.37	2586.75	0.966092	1
EGFP	g3	post	41	3851.94	1838.68	0.976761	1
EGFP	g3	post	42	8976.93	4052.76	1.03317	1
EGFP	g3	post	43	16607.4	7661.04	1.01097	1
EGFP	g3	post	45	4271.69	1919.4	1.03811	1
EGFP	g3	post	46	21081.4	10873	0.903433	1
EGFP	g3	post	47	4756.73	2467.99	0.898031	1
EGFP	g3	post	48	20807.1	11037.1	0.878215	1
EGFP	g3	post	49	6816.87	3008.05	1.05722	1
EGFP	g3	post	50	4578.47	2255.89	0.946039	1
EGFP	g3	post	51	16198	7889.57	0.957096	1
EGFP	g3	post	52	4385.26	1862.82	1.09851	1
EGFP	g3	post	53	8776.51	3992.31	1.02534	1
EGFP	g3	post	54	8386.53	3959.34	0.987669	1
EGFP	g3	post	55	3289.59	1411.16	1.08772	1
EGFP	g3	post	56	3648.56	1846.91	0.920639	1
EGFP	g3	post	57	5922.56	2696.35	1.02448	1
EGFP	g3	post	58	4613.77	1893.03	1.13758	1
EGFP	g3	post	59	4793.58	2107.75	1.061	1
EGFP	g3	post	60	3581.71	1738.08	0.960684	1
EGFP	g3	post	61	9378.58	4783.52	0.913642	1
EGFP	g3	post	62	4612.56	2066.91	1.04097	1
EGFP	g3	post	63	5163.01	2243.07	1.07392	1
EGFP	g3	post	64	6701.4	3039.65	1.0283	1
EGFP	g3	post	65	5636.41	2974.19	0.882872	1
EGFP	g3	post	66	17841.9	9358.74	0.888197	1
EGFP	g3	post	67	8762.61	3812.82	1.07225	1
EGFP	g3	post	68	3642.21	1733.77	0.979485	1
EGFP	g3	post	69	3982.2	1794.37	1.03517	1
EGFP	g3	post	70	6356.12	2673.94	1.1093	1
EGFP	g3	post	71	4207.09	2076.28	0.94449	1
EGFP	g3	post	72	5544.57	2361.65	1.09553	1
EGFP	g3	post	73	3961.87	1448.1	1.2779	1
EGFP	g3	post	74	8317.54	3662.65	1.05943	1
EGFP	g3	post	75	3554.87	1583.67	1.04712	1
EGFP	g3	post	77	5937.97	2356.95	1.17615	1
EGFP	g3	post	78	6775.21	3211.64	0.983633	1
EGFP	g3	post	79	19436.4	9301.02	0.974295	1
EGFP	g3	post	81	3538.32	1524.45	1.08298	1
EGFP	g3	post	82	14800.2	7406.97	0.931278	1
EGFP	g3	post	84	5118.33	3140.02	0.758335	1
EGFP	g3	post	86	13936.7	7060.75	0.919855	1
EGFP	g3	post	88	10480.1	5088.82	0.960079	1
EGFP	g3	post	89	4649.28	2130.17	1.01794	1
EGFP	g3	post	90	7610.9	3040.51	1.16855	1
EGFP	g3	post	91	2969.71	1582.26	0.874307	1
EGFP	g3	post	92	5987.17	2540.86	1.09957	1
EGFP	g3	post	94	4810.65	1913.78	1.17349	1
EGFP	g3	post	97	5551.96	2847.34	0.908603	1
EGFP	g3	post	98	10619.7	6507.15	0.759259	1
EGFP	g3	post	99	8217.61	3544.98	1.0816	1
EGFP	g3	post	100	11421.5	6987.36	0.760476	1
EGFP	g3	post	101	7982.3	3602.63	1.03349	1
EGFP	g3	post	102	3738.55	2119.97	0.821034	1
EGFP	g3	post	103	4819.12	2765.99	0.81107	1
EGFP	g3	post	104	12763.3	6645.35	0.894863	1
EGFP	g3	post	105	17693.5	9228.31	0.8933	1
EGFP	g3	post	106	4415.62	1703.05	1.21065	1
EGFP	g3	post	107	4328.32	2053.54	0.982768	1
EGFP	g3	post	108	5267.66	2209.83	1.11244	1
EGFP	g3	post	109	21063.1	11724	0.836578	1
EGFP	g3	post	110	19528.9	11660.3	0.779378	1
EGFP	g3	post	111	3517.75	2126.63	0.769661	1
EGFP	g3	post	112	10375.1	4802.67	1.00745	1
EGFP	g3	post	114	3551.98	1992.93	0.829869	1
EGFP	g3	post	115	3609.38	1616.63	1.04146	1
EGFP	g3	post	116	4565.21	1704.26	1.25102	1
EGFP	g3	post	117	3704.64	1835.51	0.940758	1
EGFP	g3	post	118	7789.77	3497.74	1.03884	1
EGFP	g3	post	120	6078.13	1971.23	1.44116	1
EGFP	g3	post	121	3872.27	1531.4	1.18049	1
EGFP	g3	post	122	23434	12010.9	0.909162	1
EGFP	g3	post	123	7134.38	3108.84	1.07069	1
EGFP	g3	post	125	8083.17	3805.36	0.990481	1
EGFP	g3	post	127	4651.85	2237.14	0.969443	1
EGFP	g3	post	128	3692.37	1418.96	1.21506	1
EGFP	g3	post	129	4339.93	2047.76	0.988227	1
EGFP	g3	post	131	4123.87	2463.47	0.778997	1
EGFP	g3	post	138	4370.41	1877.06	1.08641	1
EGFP	g3	post	141	13537.1	6241.76	1.01146	1
EGFP	g3	post	143	3166.75	1592.05	0.927034	1
EGFP	g3	pre	1	3909.1	2405.74	0.799039	1
EGFP	g3	pre	2	13387	6198.31	1.06501	1
EGFP	g3	pre	3	7061.91	3393.85	1.02574	1
EGFP	g3	pre	4	7908.98	3533.11	1.10417	1
EGFP	g3	pre	5	6928.04	2926.32	1.1683	1
EGFP	g3	pre	6	4178.05	1967.31	1.04709	1
EGFP	g3	pre	7	6271.47	3200.01	0.965583	1
EGFP	g3	pre	8	10770.2	4453.13	1.1937	1
EGFP	g3	pre	9	16915.9	7569.65	1.10227	1
EGFP	g3	pre	10	7055	2918.03	1.19328	1
EGFP	g3	pre	11	2790.58	1428.87	0.962185	1
EGFP	g3	pre	12	4349.22	2266.25	0.945343	1
EGFP	g3	pre	13	13822.2	6838.31	0.996149	1
EGFP	g3	pre	14	9831.75	4458.47	1.08759	1
EGFP	g3	pre	15	4087.07	2093.69	0.961737	1
EGFP	g3	pre	16	4846.03	2444.55	0.976798	1
EGFP	g3	pre	17	5938.71	2392.62	1.22529	1
EGFP	g3	pre	18	11047	5239.66	1.03943	1
EGFP	g3	pre	19	5223.57	2877.91	0.893595	1
EGFP	g3	pre	20	6848.36	3471.79	0.971921	1
EGFP	g3	pre	21	5279.67	2396.8	1.08641	1
EGFP	g3	pre	22	17447.9	9055.21	0.949178	1
EGFP	g3	pre	23	4918.08	1937.18	1.25348	1
EGFP	g3	pre	24	10300	5517.79	0.919272	1
EGFP	g3	pre	25	5921.08	2978.39	0.979602	1
EGFP	g3	pre	26	4022.36	1862.29	1.06507	1
EGFP	g3	pre	27	7933.56	4111.36	0.950587	1
EGFP	g3	pre	28	17664	9408.36	0.924638	1
EGFP	g3	pre	29	13582	7200.12	0.929047	1
EGFP	g3	pre	30	9819.18	4623.68	1.04706	1
EGFP	g3	pre	31	14367	7706.11	0.918115	1
EGFP	g3	pre	32	15225.3	7984.33	0.939262	1
EGFP	g3	pre	33	14119.7	7192.29	0.967249	1
EGFP	g3	pre	34	3911.14	2428.72	0.791812	1
EGFP	g3	pre	35	10854.5	4768.59	1.12294	1
EGFP	g3	pre	36	7081.64	3552.39	0.98232	1
EGFP	g3	pre	37	18045.7	8464.86	1.05112	1
EGFP	g3	pre	38	6474.17	3295.99	0.967787	1
EGFP	g3	pre	39	16349.8	9162.12	0.878401	1
EGFP	g3	pre	40	17408	9246.57	0.927205	1
EGFP	g3	pre	41	6240.13	3687.57	0.832507	1
EGFP	g3	pre	42	4864.93	2266.92	1.05819	1
EGFP	g3	pre	43	5265.55	2840.39	0.912866	1
EGFP	g3	pre	44	13408.1	6083.71	1.08697	1
EGFP	g3	pre	45	6661.07	3284.28	0.999566	1
EGFP	g3	pre	46	12037.4	5643.19	1.05173	1
EGFP	g3	pre	47	4139.46	1744.48	1.17098	1
EGFP	g3	pre	48	5150.31	2626.65	0.966065	1
EGFP	g3	pre	49	3601.59	1820.85	0.974609	1
EGFP	g3	pre	50	8504.57	4166.18	1.00611	1
EGFP	g3	pre	51	15158.8	7238.6	1.03238	1
EGFP	g3	pre	53	21374.4	11410.1	0.922554	1
EGFP	g3	pre	54	4034.37	1922.17	1.03472	1
EGFP	g3	pre	55	4030.72	2171.9	0.913879	1
EGFP	g3	pre	56	19074.4	10323.4	0.909823	1
EGFP	g3	pre	57	6091.63	2892.91	1.03813	1
EGFP	g3	pre	58	4356.56	2244.42	0.956253	1
EGFP	g3	pre	59	14554.7	7651.34	0.936951	1
EGFP	g3	pre	60	4149.93	1829.56	1.11896	1
EGFP	g3	pre	61	8044.39	3887.7	1.01997	1
EGFP	g3	pre	62	3072.67	1377.08	1.10057	1
EGFP	g3	pre	63	7649.82	3894.51	0.967787	1
EGFP	g3	pre	64	3384.11	1776.43	0.938321	1
EGFP	g3	pre	65	5720.57	2720.79	1.03655	1
EGFP	g3	pre	66	4106.71	1758.26	1.15248	1
EGFP	g3	pre	67	10801.4	5484.43	0.970381	1
EGFP	g3	pre	68	3243.49	1699.11	0.940274	1
EGFP	g3	pre	69	8580.88	4714.62	0.896081	1
EGFP	g3	pre	70	4356.06	2043.29	1.05114	1
EGFP	g3	pre	71	4802.63	2206.59	1.07332	1
EGFP	g3	pre	72	6612.29	3156.12	1.03283	1
EGFP	g3	pre	73	5012.41	2922.54	0.843885	1
EGFP	g3	pre	74	16521.9	8990.69	0.904838	1
EGFP	g3	pre	75	17434.9	8784.25	0.977996	1
EGFP	g3	pre	76	8287.97	3842.87	1.06349	1
EGFP	g3	pre	77	16970.7	9231.61	0.905163	1
EGFP	g3	pre	78	3283.89	1650.05	0.980672	1
EGFP	g3	pre	79	3690.28	1743.97	1.04325	1
EGFP	g3	pre	80	6117.4	2635.43	1.14529	1
EGFP	g3	pre	81	9911.71	5461.3	0.893516	1
EGFP	g3	pre	82	5115.8	2220.43	1.13671	1
EGFP	g3	pre	83	5646.65	3007.95	0.924518	1
EGFP	g3	pre	84	3616.42	1401.66	1.27402	1
EGFP	g3	pre	85	8472.02	3892.9	1.07322	1
EGFP	g3	pre	86	7878.58	3780	1.02747	1
EGFP	g3	pre	87	3339.76	1575.55	1.0451	1
EGFP	g3	pre	88	4700.48	2122.61	1.09221	1
EGFP	g3	pre	89	6354.24	3174.85	0.986271	1
EGFP	g3	pre	90	18758	9277.22	0.996473	1
EGFP	g3	pre	91	3657.29	1650.63	1.09282	1
EGFP	g3	pre	92	3316.47	1516.73	1.07835	1
EGFP	g3	pre	93	14126.3	7403.99	0.939775	1
EGFP	g3	pre	95	4561.02	2908.35	0.770865	1
EGFP	g3	pre	96	14782.2	8234.32	0.883716	1
EGFP	g3	pre	98	7557.24	3191.31	1.16859	1
EGFP	g3	pre	99	9960.42	5078.9	0.966235	1
EGFP	g3	pre	100	3804.49	1837.05	1.02086	1
EGFP	g3	pre	101	7365.79	3069.77	1.1842	1
EGFP	g3	pre	102	2759.48	1523.53	0.891695	1
EGFP	g3	pre	103	5539.66	2487.01	1.09866	1
EGFP	g3	pre	104	16794.1	8965.79	0.922471	1
EGFP	g3	pre	105	17605.5	9253.39	0.937129	1
EGFP	g3	pre	106	4242.32	1830.01	1.14379	1
EGFP	g3	pre	107	16818.9	8778.76	0.943719	1
EGFP	g3	pre	108	13237.1	7808.96	0.833951	1
EGFP	g3	pre	109	10128.1	6506.42	0.765093	1
EGFP	g3	pre	110	5477.29	2903.92	0.928958	1
EGFP	g3	pre	111	7468.63	3465.34	1.06275	1
EGFP	g3	pre	112	9718.38	6142.65	0.777761	1
EGFP	g3	pre	113	7487.3	3521.25	1.04837	1
EGFP	g3	pre	114	3547.54	2099.26	0.83136	1
EGFP	g3	pre	115	3615.1	2009.19	0.885748	1
EGFP	g3	pre	116	10397.9	5219.65	0.981618	1
EGFP	g3	pre	117	15719.7	8093.15	0.956894	1
EGFP	g3	pre	118	17103.6	9128.08	0.922771	1
EGFP	g3	pre	119	4373.85	1699.03	1.27115	1
EGFP	g3	pre	120	4089.79	2033.41	0.991176	1
EGFP	g3	pre	121	4627.47	2059.25	1.10847	1
EGFP	g3	pre	122	19304.1	11259.5	0.843582	1
EGFP	g3	pre	123	16974.2	10292.1	0.811142	1
EGFP	g3	pre	124	3491.29	2118.26	0.810617	1
EGFP	g3	pre	125	10025.1	4930.03	1.0022	1
EGFP	g3	pre	127	4295.9	1678.41	1.26378	1
EGFP	g3	pre	128	3478.54	1781.14	0.962181	1
EGFP	g3	pre	129	7290.63	3454.57	1.04047	1
EGFP	g3	pre	130	8255.5	3528.61	1.15443	1
EGFP	g3	pre	131	9297.24	5450.33	0.839272	1
EGFP	g3	pre	132	3165.86	1409.41	1.108	1
EGFP	g3	pre	133	5606.93	2004.73	1.3818	1
EGFP	g3	pre	134	3454.16	1453.91	1.17242	1
EGFP	g3	pre	135	29177	14681.4	0.97927	1
EGFP	g3	pre	136	24413.3	12738.6	0.944027	1
EGFP	g3	pre	137	6743.82	3050.31	1.09042	1
EGFP	g3	pre	138	2998.61	1620.16	0.911377	1
EGFP	g3	pre	139	4335.18	1960.12	1.09083	1
EGFP	g3	pre	140	20503.2	11860.3	0.850662	1
EGFP	g3	pre	141	7912.34	3873.69	1.00674	1
EGFP	g3	pre	143	3834.63	1761.54	1.07351	1
EGFP	g3	pre	145	4491.18	2256.2	0.980884	1
EGFP	g3	pre	146	3292.93	1317.56	1.23383	1
EGFP	g3	pre	147	15468.8	8615.81	0.883821	1
EGFP	g3	pre	148	3875.76	1953.62	0.977548	1
EGFP	g3	pre	149	3686.89	2314.89	0.783016	1
EGFP	g3	pre	154	7029.32	4657.93	0.741458	1
EGFP	g3	pre	155	5059.58	2264.13	1.10225	1
EGFP	g3	pre	157	3496.27	1880.35	0.915631	1
EGFP	g3	pre	158	10145.2	5913.93	0.844079	1
mTq2_T203Y	g1	post	1	1627.6	2695.22	0.263712	1
mTq2_T203Y	g1	post	2	1147.07	2006.86	0.249273	1
mTq2_T203Y	g1	post	3	891.878	1562.29	0.248962	1
mTq2_T203Y	g1	post	5	3747.5	6845.06	0.238504	1
mTq2_T203Y	g1	post	6	2306.49	4809.57	0.208155	1
mTq2_T203Y	g1	post	7	3730.51	7787.92	0.207909	1
mTq2_T203Y	g1	post	8	980.027	1581.43	0.270784	1
mTq2_T203Y	g1	post	9	699.882	1346.01	0.226212	1
mTq2_T203Y	g1	post	10	1010.41	2000.78	0.219525	1
mTq2_T203Y	g1	post	11	2937.77	5869.01	0.217536	1
mTq2_T203Y	g1	post	12	1518.08	2599.35	0.254837	1
mTq2_T203Y	g1	post	13	3060.07	5847.12	0.227721	1
mTq2_T203Y	g1	post	14	2456.2	4678.66	0.22845	1
mTq2_T203Y	g1	post	15	1822.99	4140.72	0.190591	1
mTq2_T203Y	g1	post	16	3374.05	7057.23	0.2075	1
mTq2_T203Y	g1	post	17	1222.48	2364.39	0.224902	1
mTq2_T203Y	g1	post	18	4290.81	7729.47	0.241921	1
mTq2_T203Y	g1	post	19	1347.67	2727.65	0.214641	1
mTq2_T203Y	g1	post	20	968.079	2038.83	0.206036	1
mTq2_T203Y	g1	post	21	1815.81	3582.54	0.22035	1
mTq2_T203Y	g1	post	22	889.886	2079.64	0.185069	1
mTq2_T203Y	g1	post	23	1485.64	3186.35	0.202207	1
mTq2_T203Y	g1	post	24	945.436	1950.24	0.210486	1
mTq2_T203Y	g1	post	25	669.247	1559.76	0.185591	1
mTq2_T203Y	g1	post	26	845.628	1579.13	0.233154	1
mTq2_T203Y	g1	post	27	1178.3	2292.15	0.223571	1
mTq2_T203Y	g1	post	28	1076.14	2128.12	0.219824	1
mTq2_T203Y	g1	post	29	2277.47	4463.3	0.221876	1
mTq2_T203Y	g1	post	30	1294.34	2449.12	0.23002	1
mTq2_T203Y	g1	post	31	1218.61	2029.83	0.262132	1
mTq2_T203Y	g1	post	32	2967.44	6207.11	0.207489	1
mTq2_T203Y	g1	post	33	1362.38	2767.98	0.213798	1
mTq2_T203Y	g1	post	34	1703.33	3597.29	0.205447	1
mTq2_T203Y	g1	post	35	1098.45	2343.55	0.203306	1
mTq2_T203Y	g1	post	36	2726.38	5534.6	0.213984	1
mTq2_T203Y	g1	post	37	862.36	1745.05	0.214685	1
mTq2_T203Y	g1	post	38	4020.66	8632.67	0.201982	1
mTq2_T203Y	g1	post	39	3983.04	6876.44	0.252695	1
mTq2_T203Y	g1	post	40	1207.86	2404.39	0.218341	1
mTq2_T203Y	g1	post	41	1644.02	3273.43	0.218285	1
mTq2_T203Y	g1	post	42	1793.24	3511.65	0.222049	1
mTq2_T203Y	g1	post	43	3762.73	8569.49	0.190066	1
mTq2_T203Y	g1	post	44	759.604	1403.41	0.235724	1
mTq2_T203Y	g1	post	45	1271.65	2394.96	0.231127	1
mTq2_T203Y	g1	post	46	2707.88	5144.4	0.229074	1
mTq2_T203Y	g1	post	47	4739.29	10438.4	0.196743	1
mTq2_T203Y	g1	post	48	4697.3	9633.6	0.211745	1
mTq2_T203Y	g1	post	49	885.949	1620.46	0.23817	1
mTq2_T203Y	g1	post	50	1822.24	3540.37	0.223859	1
mTq2_T203Y	g1	post	51	876.659	1782.64	0.213613	1
mTq2_T203Y	g1	post	53	2603.46	5528.44	0.204293	1
mTq2_T203Y	g1	post	54	2783.3	4882.43	0.248599	1
mTq2_T203Y	g1	post	55	1475.49	2691.9	0.238794	1
mTq2_T203Y	g1	post	57	1762.7	3202.98	0.23978	1
mTq2_T203Y	g1	post	59	993.987	1921.81	0.224981	1
mTq2_T203Y	g1	post	61	2603.04	5101.47	0.22187	1
mTq2_T203Y	g1	post	62	2276.65	4435.3	0.223233	1
mTq2_T203Y	g1	post	64	1904.51	3907.23	0.211672	1
mTq2_T203Y	g1	post	65	3502.48	7035.32	0.216324	1
mTq2_T203Y	g1	post	66	744.65	1475.89	0.219318	1
mTq2_T203Y	g1	post	67	2696.44	6712.43	0.173363	1
mTq2_T203Y	g1	post	68	2483.57	4975.67	0.216905	1
mTq2_T203Y	g1	post	69	1504.6	2904.42	0.225348	1
mTq2_T203Y	g1	post	70	765.137	1580.17	0.210232	1
mTq2_T203Y	g1	post	71	3037.08	6801.36	0.193398	1
mTq2_T203Y	g1	post	72	1796.64	3537.06	0.220839	1
mTq2_T203Y	g1	post	73	872.114	1785.46	0.212128	1
mTq2_T203Y	g1	post	74	2689.55	6087.51	0.191286	1
mTq2_T203Y	g1	post	75	1290.64	2715.07	0.206277	1
mTq2_T203Y	g1	post	76	1095.7	1938.95	0.246379	1
mTq2_T203Y	g1	post	77	1117.61	2293.29	0.21163	1
mTq2_T203Y	g1	post	78	687.385	1383.05	0.21595	1
mTq2_T203Y	g1	post	79	2832.33	5733.85	0.214592	1
mTq2_T203Y	g1	post	81	1688.77	3095.04	0.237683	1
mTq2_T203Y	g1	post	82	1955.46	4115.79	0.206166	1
mTq2_T203Y	g1	post	83	1154.5	2025.34	0.248582	1
mTq2_T203Y	g1	post	84	857.121	1701.77	0.218925	1
mTq2_T203Y	g1	post	85	732.56	1560.19	0.203672	1
mTq2_T203Y	g1	post	86	5037.54	8770.47	0.250525	1
mTq2_T203Y	g1	post	87	1293.6	2628.97	0.213738	1
mTq2_T203Y	g1	post	88	1707.21	3177.54	0.233946	1
mTq2_T203Y	g1	post	89	1102.62	2531.34	0.188504	1
mTq2_T203Y	g1	post	90	1240.45	2360.84	0.228651	1
mTq2_T203Y	g1	post	91	1187.04	2026.86	0.255567	1
mTq2_T203Y	g1	post	92	3159.38	5578.36	0.246945	1
mTq2_T203Y	g1	post	93	1665.01	3119.75	0.232347	1
mTq2_T203Y	g1	post	94	842.286	1709.8	0.213991	1
mTq2_T203Y	g1	post	95	1019.61	2149.5	0.205825	1
mTq2_T203Y	g1	post	96	960.043	2031.72	0.205011	1
mTq2_T203Y	g1	post	97	871.991	1975.85	0.191067	1
mTq2_T203Y	g1	post	98	1662.16	3669.44	0.196273	1
mTq2_T203Y	g1	post	99	1226.65	2688.79	0.197718	1
mTq2_T203Y	g1	post	100	733.139	1641.52	0.193435	1
mTq2_T203Y	g1	post	101	2533.32	5674.31	0.193359	1
mTq2_T203Y	g1	post	102	1973.7	3876.24	0.22139	1
mTq2_T203Y	g1	post	103	5388.08	11729.1	0.199135	1
mTq2_T203Y	g1	post	104	1522.75	3443.59	0.191457	1
mTq2_T203Y	g1	post	105	2407.9	5504.51	0.189332	1
mTq2_T203Y	g1	post	106	1308.74	3840.67	0.146126	1
mTq2_T203Y	g1	post	107	911.232	1785.46	0.221919	1
mTq2_T203Y	g1	post	108	4782.87	10121.1	0.205028	1
mTq2_T203Y	g1	post	109	951.334	1388.17	0.300102	1
mTq2_T203Y	g1	post	110	1196.35	2044.29	0.255371	1
mTq2_T203Y	g1	post	111	948.908	1749.43	0.23624	1
mTq2_T203Y	g1	post	112	3749.39	8674.51	0.187003	1
mTq2_T203Y	g1	post	113	1280.65	2334.12	0.239035	1
mTq2_T203Y	g1	post	114	1543.77	2783.6	0.241686	1
mTq2_T203Y	g1	post	116	2950.19	7206.98	0.176779	1
mTq2_T203Y	g1	post	117	1048.95	1872.38	0.2442	1
mTq2_T203Y	g1	post	118	792.981	1912.74	0.179114	1
mTq2_T203Y	g1	post	119	1782.66	3524.22	0.219894	1
mTq2_T203Y	g1	post	120	1382.04	2787.04	0.215448	1
mTq2_T203Y	g1	post	121	5844.78	12536.5	0.202193	1
mTq2_T203Y	g1	post	122	2787.59	5713.47	0.21188	1
mTq2_T203Y	g1	post	123	1877.36	3905.16	0.20868	1
mTq2_T203Y	g1	post	124	1204.57	2651.81	0.196842	1
mTq2_T203Y	g1	post	125	1764.46	3551.35	0.215876	1
mTq2_T203Y	g1	post	126	1268.26	2534.1	0.217501	1
mTq2_T203Y	g1	post	127	1301.79	2578.7	0.219443	1
mTq2_T203Y	g1	post	128	2605.06	5436.85	0.20797	1
mTq2_T203Y	g1	post	129	2831.72	6023.68	0.203925	1
mTq2_T203Y	g1	post	130	2485.4	5138.22	0.210007	1
mTq2_T203Y	g1	post	131	2042.54	3946.26	0.225148	1
mTq2_T203Y	g1	post	132	2278.44	4724.95	0.20934	1
mTq2_T203Y	g1	post	133	2594.84	5996.02	0.18724	1
mTq2_T203Y	g1	post	134	807.911	1717.39	0.204073	1
mTq2_T203Y	g1	post	135	1202.49	2238.84	0.233869	1
mTq2_T203Y	g1	pre	1	1043.26	1775.36	0.259841	1
mTq2_T203Y	g1	pre	2	1289.87	2320.68	0.245484	1
mTq2_T203Y	g1	pre	3	2965.46	5384.67	0.243186	1
mTq2_T203Y	g1	pre	4	4385.25	8532.09	0.226603	1
mTq2_T203Y	g1	pre	6	1266.66	2372.17	0.235625	1
mTq2_T203Y	g1	pre	7	1786.77	3297.75	0.239167	1
mTq2_T203Y	g1	pre	8	4389.72	8913.6	0.216903	1
mTq2_T203Y	g1	pre	9	1860.72	3474.96	0.236302	1
mTq2_T203Y	g1	pre	10	772.797	1377.4	0.247848	1
mTq2_T203Y	g1	pre	12	4068.79	10714.9	0.16603	1
mTq2_T203Y	g1	pre	13	4895.66	9624.03	0.22422	1
mTq2_T203Y	g1	pre	14	927.459	1587.14	0.258363	1
mTq2_T203Y	g1	pre	15	1857.77	3764.06	0.21739	1
mTq2_T203Y	g1	pre	17	2944.44	4923.44	0.264539	1
mTq2_T203Y	g1	pre	18	1472.84	2570.01	0.253278	1
mTq2_T203Y	g1	pre	19	1106.25	2007.32	0.243359	1
mTq2_T203Y	g1	pre	20	1027.99	1975.17	0.229528	1
mTq2_T203Y	g1	pre	22	2814.19	5377.98	0.230804	1
mTq2_T203Y	g1	pre	23	2399.64	4474.26	0.236688	1
mTq2_T203Y	g1	pre	25	2128.55	4153.52	0.225925	1
mTq2_T203Y	g1	pre	26	3578.08	7014.03	0.22487	1
mTq2_T203Y	g1	pre	27	777.618	1477.17	0.232222	1
mTq2_T203Y	g1	pre	28	2999.06	7056.54	0.186458	1
mTq2_T203Y	g1	pre	29	2612.49	4893.87	0.235563	1
mTq2_T203Y	g1	pre	30	1612.23	2955.24	0.240853	1
mTq2_T203Y	g1	pre	31	750.153	1480.37	0.223336	1
mTq2_T203Y	g1	pre	32	2987	6367.32	0.206362	1
mTq2_T203Y	g1	pre	33	1809.65	3391.22	0.235473	1
mTq2_T203Y	g1	pre	34	2032.92	3504.07	0.256469	1
mTq2_T203Y	g1	pre	35	930.767	1825.22	0.224787	1
mTq2_T203Y	g1	pre	36	2768.56	5947.42	0.204734	1
mTq2_T203Y	g1	pre	37	2900.45	5438.53	0.235331	1
mTq2_T203Y	g1	pre	38	1301.64	2603.77	0.220255	1
mTq2_T203Y	g1	pre	39	992.869	1705.12	0.257429	1
mTq2_T203Y	g1	pre	40	1140.66	2168.79	0.232006	1
mTq2_T203Y	g1	pre	41	670.577	1296.93	0.227991	1
mTq2_T203Y	g1	pre	42	979.164	2027	0.212655	1
mTq2_T203Y	g1	pre	43	3118.43	5915.35	0.232561	1
mTq2_T203Y	g1	pre	44	3092.69	5795.24	0.235487	1
mTq2_T203Y	g1	pre	45	1934.39	3836.48	0.222198	1
mTq2_T203Y	g1	pre	46	1238.16	1757.23	0.312624	1
mTq2_T203Y	g1	pre	47	1146.95	1726.29	0.294481	1
mTq2_T203Y	g1	pre	48	924.822	1638.05	0.249441	1
mTq2_T203Y	g1	pre	49	778.757	1548.55	0.221604	1
mTq2_T203Y	g1	pre	50	1257.93	2436.83	0.227616	1
mTq2_T203Y	g1	pre	51	1785.3	3256.55	0.242056	1
mTq2_T203Y	g1	pre	52	1036.22	2297.11	0.198232	1
mTq2_T203Y	g1	pre	53	1624.52	3302.45	0.21665	1
mTq2_T203Y	g1	pre	54	876.16	1733.34	0.222769	1
mTq2_T203Y	g1	pre	55	2106.42	3648.09	0.255226	1
mTq2_T203Y	g1	pre	58	1557.81	2752.84	0.250031	1
mTq2_T203Y	g1	pre	59	812.229	1555.52	0.230298	1
mTq2_T203Y	g1	pre	60	958.218	1975.51	0.213552	1
mTq2_T203Y	g1	pre	61	960.001	1940.48	0.217917	1
mTq2_T203Y	g1	pre	62	1755.01	3674.23	0.210215	1
mTq2_T203Y	g1	pre	63	899.001	1926.87	0.20521	1
mTq2_T203Y	g1	pre	64	896.59	1571.36	0.252147	1
mTq2_T203Y	g1	pre	65	2686.78	5783.65	0.204301	1
mTq2_T203Y	g1	pre	66	6146.17	12666.6	0.213633	1
mTq2_T203Y	g1	pre	67	2124.69	3970.23	0.236162	1
mTq2_T203Y	g1	pre	68	1643.23	3457.24	0.209154	1
mTq2_T203Y	g1	pre	69	2614.26	5655.96	0.203248	1
mTq2_T203Y	g1	pre	70	725.147	1296.92	0.24698	1
mTq2_T203Y	g1	pre	71	1316.21	3673.14	0.156374	1
mTq2_T203Y	g1	pre	72	893.243	1655.63	0.238131	1
mTq2_T203Y	g1	pre	73	4878.36	10177.8	0.210963	1
mTq2_T203Y	g1	pre	74	980.56	1376.71	0.316071	1
mTq2_T203Y	g1	pre	75	1161.54	1943.92	0.264306	1
mTq2_T203Y	g1	pre	76	903.203	1572.61	0.25384	1
mTq2_T203Y	g1	pre	77	3742.12	8376.33	0.19627	1
mTq2_T203Y	g1	pre	78	1207.1	2110.75	0.252734	1
mTq2_T203Y	g1	pre	80	3054.69	7269.46	0.184294	1
mTq2_T203Y	g1	pre	81	1026.58	1721.84	0.263713	1
mTq2_T203Y	g1	pre	82	790.93	1814.07	0.191419	1
mTq2_T203Y	g1	pre	83	850.578	1528.14	0.245842	1
mTq2_T203Y	g1	pre	84	1528.57	3057.07	0.220304	1
mTq2_T203Y	g1	pre	85	772.578	1441.87	0.23646	1
mTq2_T203Y	g1	pre	86	6085.74	12487.6	0.214587	1
mTq2_T203Y	g1	pre	87	2541.87	4996.85	0.224222	1
mTq2_T203Y	g1	pre	88	1815.86	3680.78	0.217292	1
mTq2_T203Y	g1	pre	89	1969.34	3651.84	0.23802	1
mTq2_T203Y	g1	pre	90	1257.53	2615.9	0.211601	1
mTq2_T203Y	g1	pre	91	904.548	1523.35	0.262619	1
mTq2_T203Y	g1	pre	92	1286.5	2475.7	0.229166	1
mTq2_T203Y	g1	pre	93	2786.66	5692.72	0.215566	1
mTq2_T203Y	g1	pre	94	2742.12	5715.73	0.211161	1
mTq2_T203Y	g1	pre	95	701.663	1191.22	0.260472	1
mTq2_T203Y	g1	pre	96	1540.02	3135.98	0.216274	1
mTq2_T203Y	g1	pre	97	1321.23	2700.95	0.215413	1
mTq2_T203Y	g1	pre	98	1980.91	4146.84	0.210232	1
mTq2_T203Y	g1	pre	99	2702.27	5297.16	0.224872	1
mTq2_T203Y	g1	pre	100	1641.81	3080.48	0.235177	1
mTq2_T203Y	g1	pre	101	2698.15	5937.09	0.199748	1
mTq2_T203Y	g1	pre	102	1202.15	2136.31	0.248602	1
mTq2_T203Y	g1	pre	103	791.558	1537.03	0.227063	1
mTq2_T203Y	g1	pre	104	1084.01	1913.8	0.250269	1
mTq2_T203Y	g1	pre	105	1007.94	1832.23	0.242914	1
mTq2_T203Y	g1	pre	106	976.615	1501.27	0.288221	1
mTq2_T203Y	g1	pre	107	5027.98	10223.6	0.216598	1
mTq2_T203Y	g1	pre	108	2176.97	4603.29	0.208077	1
mTq2_T203Y	g1	pre	109	3505.49	6090.1	0.254414	1
mTq2_T203Y	g1	pre	110	863.965	1675.58	0.227348	1
mTq2_T203Y	g1	pre	111	967.692	1737.86	0.245941	1
mTq2_T203Y	g1	pre	112	1955.04	3815.52	0.22589	1
mTq2_T203Y	g1	pre	113	2103.63	3452.81	0.269596	1
mTq2_T203Y	g1	pre	114	1549.28	2888.65	0.236693	1
mTq2_T203Y	g1	pre	116	2555.31	5029.64	0.223931	1
mTq2_T203Y	g1	pre	117	4378.32	9015.92	0.21381	1
mTq2_T203Y	g1	pre	118	1465.05	2507.29	0.258345	1
mTq2_T203Y	g1	pre	119	893.285	1560.82	0.252931	1
mTq2_T203Y	g1	pre	120	841.092	1777.25	0.208231	1
mTq2_T203Y	g1	pre	121	958.279	1921.65	0.219701	1
mTq2_T203Y	g1	pre	122	1081.83	1964.17	0.243212	1
mTq2_T203Y	g1	pre	123	3649.29	7380.29	0.2178	1
mTq2_T203Y	g1	pre	124	1456.89	2793.71	0.229995	1
mTq2_T203Y	g1	pre	125	3025.85	6217.79	0.214272	1
mTq2_T203Y	g1	pre	126	2470.02	4412.7	0.247261	1
mTq2_T203Y	g1	pre	127	1176.43	2386.82	0.217088	1
mTq2_T203Y	g1	pre	128	652.234	1157.14	0.249023	1
mTq2_T203Y	g1	pre	129	6510.82	13377.4	0.214299	1
mTq2_T203Y	g1	pre	130	1177.16	2132.04	0.243821	1
mTq2_T203Y	g2	post	1	1808.82	3718.76	0.220991	1
mTq2_T203Y	g2	post	2	1326.94	2363.39	0.256087	1
mTq2_T203Y	g2	post	3	1062.1	1904.7	0.254294	1
mTq2_T203Y	g2	post	4	1699.25	2926.33	0.265075	1
mTq2_T203Y	g2	post	5	4077.01	7377.79	0.251948	1
mTq2_T203Y	g2	post	6	2017.16	3066.56	0.301134	1
mTq2_T203Y	g2	post	7	1190.5	2200.61	0.246515	1
mTq2_T203Y	g2	post	8	980.741	1817.69	0.245845	1
mTq2_T203Y	g2	post	9	1011.7	1817.58	0.253825	1
mTq2_T203Y	g2	post	10	809.532	1275.66	0.290289	1
mTq2_T203Y	g2	post	11	3362.91	6595.98	0.231951	1
mTq2_T203Y	g2	post	12	673.066	1369.98	0.22328	1
mTq2_T203Y	g2	post	13	1286.01	2534.14	0.230845	1
mTq2_T203Y	g2	post	14	1792.3	3488.84	0.233767	1
mTq2_T203Y	g2	post	15	3553.33	6812.15	0.237458	1
mTq2_T203Y	g2	post	16	1258.13	2841.97	0.200554	1
mTq2_T203Y	g2	post	18	2815.12	5571.35	0.229821	1
mTq2_T203Y	g2	post	19	2353.11	4773.05	0.224076	1
mTq2_T203Y	g2	post	20	2706.25	6096	0.201134	1
mTq2_T203Y	g2	post	21	816.521	1509.2	0.246534	1
mTq2_T203Y	g2	post	23	974.495	1865.08	0.237869	1
mTq2_T203Y	g2	post	26	1672.16	3501.09	0.216881	1
mTq2_T203Y	g2	post	27	981.048	1651.94	0.271247	1
mTq2_T203Y	g2	post	28	2961.59	5462.23	0.24708	1
mTq2_T203Y	g2	post	29	1229.96	1875.61	0.300187	1
mTq2_T203Y	g2	post	30	615.527	1162.18	0.241206	1
mTq2_T203Y	g2	post	31	3646.11	8610.86	0.191545	1
mTq2_T203Y	g2	post	32	1234.14	2570.09	0.218088	1
mTq2_T203Y	g2	post	34	1174.07	2168.01	0.246775	1
mTq2_T203Y	g2	post	35	1254.45	2179.35	0.262704	1
mTq2_T203Y	g2	post	36	752.564	1381.07	0.248352	1
mTq2_T203Y	g2	post	38	1346.57	1783.34	0.346628	1
mTq2_T203Y	g2	post	39	4752.92	10649.6	0.202239	1
mTq2_T203Y	g2	post	40	716.658	1497.69	0.217299	1
mTq2_T203Y	g2	post	42	1772.44	3804.89	0.211372	1
mTq2_T203Y	g2	post	43	1108.37	2155.58	0.233984	1
mTq2_T203Y	g2	post	44	5379.69	11389.6	0.214411	1
mTq2_T203Y	g2	post	46	2136.95	4572.7	0.212072	1
mTq2_T203Y	g2	post	47	1147.23	1983.7	0.263976	1
mTq2_T203Y	g2	post	48	3315.49	6379.69	0.236559	1
mTq2_T203Y	g2	post	50	4733.61	7348.02	0.29478	1
mTq2_T203Y	g2	post	51	1128.48	2385.32	0.214768	1
mTq2_T203Y	g2	post	52	862.991	1851.58	0.21149	1
mTq2_T203Y	g2	post	53	1426.63	3029.88	0.21372	1
mTq2_T203Y	g2	post	54	701.997	1522.2	0.209193	1
mTq2_T203Y	g2	post	55	1242.34	2348.31	0.240926	1
mTq2_T203Y	g2	post	56	1179.23	2202.81	0.243871	1
mTq2_T203Y	g2	post	57	3741.11	8776.36	0.192873	1
mTq2_T203Y	g2	post	59	1148.02	2458.54	0.211897	1
mTq2_T203Y	g2	post	60	953.88	1741.77	0.249631	1
mTq2_T203Y	g2	post	61	2093.57	3816.32	0.250067	1
mTq2_T203Y	g2	post	62	1776.68	2619.33	0.310722	1
mTq2_T203Y	g2	post	63	3556.12	6821.17	0.237326	1
mTq2_T203Y	g2	post	64	1268.13	2318.44	0.249315	1
mTq2_T203Y	g2	post	65	1195.36	2130.89	0.255858	1
mTq2_T203Y	g2	post	66	916.841	1505.3	0.278354	1
mTq2_T203Y	g2	post	67	891.431	1641.69	0.247455	1
mTq2_T203Y	g2	post	68	2007.3	3858.99	0.236777	1
mTq2_T203Y	g2	post	69	1835.96	4373.17	0.189858	1
mTq2_T203Y	g2	post	70	1151.64	2378.77	0.219929	1
mTq2_T203Y	g2	post	71	914.441	1903.01	0.218241	1
mTq2_T203Y	g2	post	72	2155.67	4632.51	0.21114	1
mTq2_T203Y	g2	post	73	1160.23	2236.18	0.236162	1
mTq2_T203Y	g2	post	74	3803.44	6488.31	0.267656	1
mTq2_T203Y	g2	post	75	4475.29	9524.99	0.213249	1
mTq2_T203Y	g2	post	76	2517.8	5739.09	0.19869	1
mTq2_T203Y	g2	post	77	1528.66	2481.35	0.281621	1
mTq2_T203Y	g2	post	78	1469.93	2950.62	0.226496	1
mTq2_T203Y	g2	post	79	3740.75	7582.5	0.224235	1
mTq2_T203Y	g2	post	80	1182.35	2009.04	0.268738	1
mTq2_T203Y	g2	post	81	7113.95	14982.2	0.215578	1
mTq2_T203Y	g2	post	82	2269.7	4770.54	0.216021	1
mTq2_T203Y	g2	post	83	897.685	1753.54	0.232926	1
mTq2_T203Y	g2	post	84	4333.71	9170.39	0.214526	1
mTq2_T203Y	g2	post	85	877.654	1509.45	0.265432	1
mTq2_T203Y	g2	post	86	810.344	1646.7	0.223656	1
mTq2_T203Y	g2	post	87	1608.05	3411.4	0.213965	1
mTq2_T203Y	g2	post	88	1167.88	2145.7	0.248059	1
mTq2_T203Y	g2	post	89	1057.77	1796.61	0.268854	1
mTq2_T203Y	g2	post	90	2400.02	4462.41	0.245039	1
mTq2_T203Y	g2	post	91	851.186	1595.68	0.242982	1
mTq2_T203Y	g2	post	92	5424.44	10876.3	0.226759	1
mTq2_T203Y	g2	post	93	923.838	2003.18	0.209199	1
mTq2_T203Y	g2	post	94	1657.04	3108.17	0.242838	1
mTq2_T203Y	g2	post	95	1660.05	3717.74	0.202342	1
mTq2_T203Y	g2	post	96	950.158	1537.53	0.282516	1
mTq2_T203Y	g2	post	97	2196.81	4128.64	0.242355	1
mTq2_T203Y	g2	post	98	886.63	1849	0.217772	1
mTq2_T203Y	g2	post	99	1085.62	2089.01	0.236553	1
mTq2_T203Y	g2	post	100	6777.45	13575.5	0.226994	1
mTq2_T203Y	g2	post	101	968.968	2166.19	0.202713	1
mTq2_T203Y	g2	post	102	739.352	1561.07	0.215014	1
mTq2_T203Y	g2	post	103	1984.3	4210.26	0.21393	1
mTq2_T203Y	g2	post	104	967.575	2073.09	0.211792	1
mTq2_T203Y	g2	post	105	2606.72	5300.89	0.223492	1
mTq2_T203Y	g2	post	106	771.913	1355.6	0.259812	1
mTq2_T203Y	g2	post	107	722.052	1613.97	0.202742	1
mTq2_T203Y	g2	post	108	1163.53	2515.35	0.209848	1
mTq2_T203Y	g2	post	109	1311.81	2539.27	0.235115	1
mTq2_T203Y	g2	post	110	1548.66	2928.25	0.240848	1
mTq2_T203Y	g2	post	111	1137.13	1969.83	0.263483	1
mTq2_T203Y	g2	post	112	2629.67	4592.39	0.261305	1
mTq2_T203Y	g2	post	113	5098.35	9972.53	0.232605	1
mTq2_T203Y	g2	post	114	1303.02	2447.03	0.242542	1
mTq2_T203Y	g2	post	115	5354.33	10496.8	0.232068	1
mTq2_T203Y	g2	post	116	2802.11	5865.09	0.216951	1
mTq2_T203Y	g2	post	117	739.81	1410.21	0.238858	1
mTq2_T203Y	g2	post	118	1699.13	4119.55	0.186412	1
mTq2_T203Y	g2	post	119	718.229	1463.67	0.223003	1
mTq2_T203Y	g2	post	120	1892.64	4195.46	0.204491	1
mTq2_T203Y	g2	post	121	781.883	1654.15	0.214574	1
mTq2_T203Y	g2	post	122	1432.55	3209.8	0.202241	1
mTq2_T203Y	g2	post	123	2647.94	4521.02	0.267421	1
mTq2_T203Y	g2	post	126	2015.04	4221.47	0.21675	1
mTq2_T203Y	g2	post	127	4433.38	9157.9	0.219917	1
mTq2_T203Y	g2	post	128	1456.8	2797.4	0.237061	1
mTq2_T203Y	g2	post	129	1197.2	2182.76	0.250019	1
mTq2_T203Y	g2	post	130	835.709	1683.9	0.225616	1
mTq2_T203Y	g2	post	133	865.115	1919.68	0.204276	1
mTq2_T203Y	g2	post	135	2432.07	4680.73	0.236511	1
mTq2_T203Y	g2	post	136	1011.36	2302.75	0.198918	1
mTq2_T203Y	g2	post	137	931.338	2013.32	0.209855	1
mTq2_T203Y	g2	post	138	5143.23	11792.4	0.197491	1
mTq2_T203Y	g2	post	139	3970.69	6788.45	0.267058	1
mTq2_T203Y	g2	post	140	843.723	1682.61	0.228021	1
mTq2_T203Y	g2	post	142	811.281	1459.86	0.253406	1
mTq2_T203Y	g2	post	143	1549.86	2650.79	0.266946	1
mTq2_T203Y	g2	post	144	1100.87	2323.87	0.215062	1
mTq2_T203Y	g2	post	145	1022.12	1897.23	0.245466	1
mTq2_T203Y	g2	post	146	1097.48	2062.69	0.242342	1
mTq2_T203Y	g2	pre	1	3887.4	7516.55	0.238982	1
mTq2_T203Y	g2	pre	2	650.152	1288.71	0.23287	1
mTq2_T203Y	g2	pre	3	1292.35	2484.77	0.240393	1
mTq2_T203Y	g2	pre	4	1786.64	3381.28	0.244386	1
mTq2_T203Y	g2	pre	5	3727.35	7035.84	0.245048	1
mTq2_T203Y	g2	pre	6	1354.06	2958.93	0.210279	1
mTq2_T203Y	g2	pre	7	5219.24	10624.8	0.226479	1
mTq2_T203Y	g2	pre	8	4226.45	8161.21	0.239315	1
mTq2_T203Y	g2	pre	9	2396.03	4762.64	0.232192	1
mTq2_T203Y	g2	pre	10	814.815	1494.15	0.252552	1
mTq2_T203Y	g2	pre	11	2737.58	6000.73	0.209599	1
mTq2_T203Y	g2	pre	12	1735.9	3539.89	0.226069	1
mTq2_T203Y	g2	pre	13	832.054	1928.84	0.197632	1
mTq2_T203Y	g2	pre	14	2735.57	4973.12	0.254833	1
mTq2_T203Y	g2	pre	15	1014.42	1617.3	0.292017	1
mTq2_T203Y	g2	pre	16	1315.99	1943.99	0.315979	1
mTq2_T203Y	g2	pre	17	3820	8868.99	0.197314	1
mTq2_T203Y	g2	pre	19	1232.85	2498.06	0.227583	1
mTq2_T203Y	g2	pre	20	1200.03	2172.47	0.255947	1
mTq2_T203Y	g2	pre	21	1200.33	2058.8	0.270714	1
mTq2_T203Y	g2	pre	23	1349.41	1754.78	0.360333	1
mTq2_T203Y	g2	pre	24	5014.61	10897.9	0.211497	1
mTq2_T203Y	g2	pre	25	714.241	1475.93	0.222957	1
mTq2_T203Y	g2	pre	26	1784.68	3793.51	0.216466	1
mTq2_T203Y	g2	pre	28	1287.93	2384.79	0.250009	1
mTq2_T203Y	g2	pre	29	4601.69	9566.59	0.221555	1
mTq2_T203Y	g2	pre	30	5090.38	10894.4	0.21492	1
mTq2_T203Y	g2	pre	32	2326.53	5043.15	0.212065	1
mTq2_T203Y	g2	pre	33	1083.95	1939.88	0.259025	1
mTq2_T203Y	g2	pre	35	3929.91	8195.34	0.220839	1
mTq2_T203Y	g2	pre	36	4691.47	7536.67	0.289731	1
mTq2_T203Y	g2	pre	37	1081.13	2389.4	0.207799	1
mTq2_T203Y	g2	pre	38	825.209	1817.11	0.208599	1
mTq2_T203Y	g2	pre	39	1406.91	3016.92	0.214483	1
mTq2_T203Y	g2	pre	40	670.843	1480.45	0.208117	1
mTq2_T203Y	g2	pre	41	1226.22	2322.72	0.24416	1
mTq2_T203Y	g2	pre	42	1155.3	2121.8	0.252143	1
mTq2_T203Y	g2	pre	43	3591.72	8232.06	0.200009	1
mTq2_T203Y	g2	pre	45	1123.11	2381.91	0.216978	1
mTq2_T203Y	g2	pre	46	941.594	1701.9	0.25637	1
mTq2_T203Y	g2	pre	47	2076.04	3726.55	0.258218	1
mTq2_T203Y	g2	pre	48	1844.77	2654.54	0.324653	1
mTq2_T203Y	g2	pre	49	3666.38	6853.82	0.247541	1
mTq2_T203Y	g2	pre	50	1884.33	3373.74	0.258909	1
mTq2_T203Y	g2	pre	51	1295.5	2335.66	0.257046	1
mTq2_T203Y	g2	pre	52	1222.79	2121.02	0.267574	1
mTq2_T203Y	g2	pre	53	876.558	1366.7	0.29883	1
mTq2_T203Y	g2	pre	54	926.997	1671.45	0.257019	1
mTq2_T203Y	g2	pre	55	2024.87	3830.42	0.2445	1
mTq2_T203Y	g2	pre	56	778.707	1550.61	0.231761	1
mTq2_T203Y	g2	pre	57	1883.79	4417.61	0.195247	1
mTq2_T203Y	g2	pre	58	1188.41	2378.73	0.230509	1
mTq2_T203Y	g2	pre	59	899.719	1852.98	0.223741	1
mTq2_T203Y	g2	pre	60	2070.09	4339.03	0.219661	1
mTq2_T203Y	g2	pre	61	2695.63	5529.78	0.224667	1
mTq2_T203Y	g2	pre	62	1234.15	2324.66	0.245593	1
mTq2_T203Y	g2	pre	63	4074.01	6915.69	0.27364	1
mTq2_T203Y	g2	pre	64	4613.89	10032.1	0.211384	1
mTq2_T203Y	g2	pre	65	2927.21	6720.24	0.199659	1
mTq2_T203Y	g2	pre	66	3715.79	7482.23	0.229072	1
mTq2_T203Y	g2	pre	67	1540.5	2573.75	0.278193	1
mTq2_T203Y	g2	pre	68	3436.94	7024.32	0.225543	1
mTq2_T203Y	g2	pre	69	1248.78	2579.79	0.223022	1
mTq2_T203Y	g2	pre	70	1125.76	1967.82	0.265443	1
mTq2_T203Y	g2	pre	71	5058.49	10614.7	0.219406	1
mTq2_T203Y	g2	pre	72	2280.52	4760.83	0.220591	1
mTq2_T203Y	g2	pre	73	817.262	1609.63	0.23443	1
mTq2_T203Y	g2	pre	74	880.884	1442.54	0.284026	1
mTq2_T203Y	g2	pre	75	867.255	1737.16	0.230335	1
mTq2_T203Y	g2	pre	76	1130.58	2050.34	0.255479	1
mTq2_T203Y	g2	pre	77	1687.79	3492.6	0.22263	1
mTq2_T203Y	g2	pre	78	1127.91	1817.99	0.288734	1
mTq2_T203Y	g2	pre	79	2504.65	4553.29	0.254835	1
mTq2_T203Y	g2	pre	80	798.097	1468.32	0.251687	1
mTq2_T203Y	g2	pre	81	5174.72	10200.3	0.234227	1
mTq2_T203Y	g2	pre	82	929.675	1970.31	0.217134	1
mTq2_T203Y	g2	pre	83	1619	2988.6	0.250812	1
mTq2_T203Y	g2	pre	84	1695.81	3751.52	0.207587	1
mTq2_T203Y	g2	pre	85	923.619	1480.42	0.290407	1
mTq2_T203Y	g2	pre	87	913.201	1885.43	0.22316	1
mTq2_T203Y	g2	pre	88	1198.47	1920.17	0.290533	1
mTq2_T203Y	g2	pre	89	7084.49	13807.4	0.237013	1
mTq2_T203Y	g2	pre	90	966.704	2092.62	0.212371	1
mTq2_T203Y	g2	pre	91	707.018	1485.65	0.219088	1
mTq2_T203Y	g2	pre	92	1904.58	3964.42	0.221267	1
mTq2_T203Y	g2	pre	93	795.488	1714.86	0.213297	1
mTq2_T203Y	g2	pre	94	1029.68	2150.67	0.220474	1
mTq2_T203Y	g2	pre	95	780.801	1330.07	0.272648	1
mTq2_T203Y	g2	pre	96	717.797	1588.08	0.207567	1
mTq2_T203Y	g2	pre	97	1188.24	2560.96	0.213346	1
mTq2_T203Y	g2	pre	98	1340.01	2609.97	0.237169	1
mTq2_T203Y	g2	pre	99	1506.92	2766.52	0.252244	1
mTq2_T203Y	g2	pre	100	1008.04	1772.05	0.263885	1
mTq2_T203Y	g2	pre	101	2659.33	4786.02	0.25752	1
mTq2_T203Y	g2	pre	102	1203.03	2343.54	0.237132	1
mTq2_T203Y	g2	pre	103	4552	9181.16	0.228678	1
mTq2_T203Y	g2	pre	104	4824.78	9766	0.22783	1
mTq2_T203Y	g2	pre	105	2750.17	5864.25	0.215751	1
mTq2_T203Y	g2	pre	106	4366.31	8654.51	0.232878	1
mTq2_T203Y	g2	pre	108	700.103	1412.47	0.22861	1
mTq2_T203Y	g2	pre	109	1719.78	4060.2	0.193871	1
mTq2_T203Y	g2	pre	110	1940.46	4224.79	0.211092	1
mTq2_T203Y	g2	pre	111	4981.1	9169.33	0.251539	1
mTq2_T203Y	g2	pre	112	1538.6	3325.87	0.212688	1
mTq2_T203Y	g2	pre	115	2087.23	4250.68	0.226383	1
mTq2_T203Y	g2	pre	116	4773.45	9687.16	0.227215	1
mTq2_T203Y	g2	pre	117	1538.22	2819.82	0.252631	1
mTq2_T203Y	g2	pre	118	1140.75	2064.97	0.255969	1
mTq2_T203Y	g2	pre	119	5811.2	11639.7	0.230344	1
mTq2_T203Y	g2	pre	121	841.387	1630.65	0.238406	1
mTq2_T203Y	g2	pre	124	825.802	1876.15	0.201865	1
mTq2_T203Y	g2	pre	125	893.439	1916.05	0.214459	1
mTq2_T203Y	g2	pre	126	958.371	2130.77	0.2065	1
mTq2_T203Y	g2	pre	127	911.992	1832.02	0.229646	1
mTq2_T203Y	g2	pre	130	844.798	1673.48	0.233023	1
mTq2_T203Y	g2	pre	131	879.453	1319.74	0.310885	1
mTq2_T203Y	g2	pre	133	784.049	1407.87	0.258127	1
mTq2_T203Y	g2	pre	134	1479.98	2489.17	0.276277	1
mTq2_T203Y	g2	pre	135	1158.79	2363.17	0.226055	1
mTq2_T203Y	g2	pre	136	1015.37	1831.24	0.256953	1
mTq2_T203Y	g2	pre	137	982.376	1892.99	0.239838	1
mTq2_T203Y	g2	pre	138	1313.43	2669.69	0.226838	1
mTq2_T203Y	g2	pre	139	1072.88	2101.58	0.235769	1
mTq2_T203Y	g2	pre	140	3989.36	8890.62	0.205989	1
mTq2_T203Y	g2	pre	142	1130.43	2327.87	0.223767	1
mTq2_T203Y	g2	pre	143	2125.77	4634.09	0.210813	1
mTq2_T203Y	g2	pre	144	3824.73	6658.67	0.266557	1
mTq2_T203Y	g2	pre	145	1119.8	1865.39	0.279042	1
mTq2_T203Y	g2	pre	146	883.557	1945.74	0.208583	1
EGFP	g1	post	1	14341	1927.52	1.13899	2
EGFP	g1	post	3	14620.4	2365.21	0.945331	2
EGFP	g1	post	39	13597	1917.12	1.08549	2
EGFP	g1	post	4	21120.5	3143.3	1.02808	2
EGFP	g1	post	5	22529.8	2942.41	1.17235	2
EGFP	g1	post	40	24885.2	3974.4	0.957631	2
EGFP	g1	post	23	18383.9	2529.31	1.11256	2
EGFP	g1	post	41	17764.9	2514.44	1.0813	2
EGFP	g1	post	42	13977.5	2150.9	0.994111	2
EGFP	g1	post	25	18249.9	3070.06	0.908875	2
EGFP	g1	post	61	18224.9	2380.23	1.17233	2
EGFP	g1	post	26	15240.3	2103.16	1.10919	2
EGFP	g1	post	9	17932.1	2608.4	1.052	2
EGFP	g1	post	10	17141.1	3226.77	0.811584	2
EGFP	g1	post	11	15902.6	2972.44	0.817409	2
EGFP	g1	post	46	16032.7	2556.11	0.959316	2
EGFP	g1	post	29	14828	1982.42	1.14509	2
EGFP	g1	post	48	20373.2	2656.06	1.17443	2
EGFP	g1	post	13	14166.5	1699.17	1.27703	2
EGFP	g1	post	14	17707.2	2726.86	0.993362	2
EGFP	g1	post	32	11971.9	1770.67	1.03454	2
EGFP	g1	post	117	17521.5	3052.05	0.877551	2
EGFP	g1	post	16	16849.1	2379.16	1.08389	2
EGFP	g1	post	36	18077.1	2235.27	1.23856	2
EGFP	g1	post	147	18943.1	2950.68	0.982021	2
EGFP	g1	post	37	11077.8	1899.25	0.891676	2
EGFP	g1	post	20	13130.5	1860.35	1.08021	2
EGFP	g1	post	95	11003.4	1599.94	1.05241	2
EGFP	g1	post	56	13662.9	2171.23	0.962447	2
EGFP	g1	post	21	10957.5	1797.22	0.932326	2
EGFP	g1	post	62	16156.5	2241.82	1.1031	2
EGFP	g1	post	154	14787.4	2580.37	0.875984	2
EGFP	g1	post	64	12154.2	1783.01	1.04307	2
EGFP	g1	post	66	11420.7	1690.86	1.03349	2
EGFP	g1	post	67	12838.2	1943.12	1.01081	2
EGFP	g1	post	50	17465.6	2606.57	1.02521	2
EGFP	g1	post	51	18099.4	2664.93	1.03923	2
EGFP	g1	post	35	9564.73	1564.21	0.93507	2
EGFP	g1	post	71	12047.5	2153.01	0.8552	2
EGFP	g1	post	54	19786.2	2115.66	1.43319	2
EGFP	g1	post	145	16079	2772.77	0.886475	2
EGFP	g1	post	128	15290.5	3401.88	0.685812	2
EGFP	g1	post	55	17360.2	2436.77	1.0904	2
EGFP	g1	post	86	20450.7	3602.48	0.867696	2
EGFP	g1	post	73	11472.6	1779.75	0.986064	2
EGFP	g1	post	38	21568.4	3367.42	0.979733	2
EGFP	g1	post	104	15836.1	2447.24	0.989886	2
EGFP	g1	post	74	10405.6	1769.56	0.899003	2
EGFP	g1	post	96	14680.5	2182.56	1.02916	2
EGFP	g1	post	98	16946.2	2605.49	0.994969	2
EGFP	g1	post	99	10850.1	1599.68	1.03783	2
EGFP	g1	post	100	13276.2	2082.33	0.97521	2
EGFP	g1	post	102	16574.7	2491.98	1.01761	2
EGFP	g1	post	80	17499.4	2572.93	1.04071	2
EGFP	g1	post	68	12960.7	1961.95	1.01066	2
EGFP	g1	post	105	18239.6	2782.4	1.00286	2
EGFP	g1	post	157	22182.3	2657.3	1.27863	2
EGFP	g1	post	108	11590.5	1808.29	0.980442	2
EGFP	g1	post	109	17239.4	2877.32	0.916104	2
EGFP	g1	post	83	11804.9	1957.72	0.922019	2
EGFP	g1	post	84	11698.8	1696.17	1.05545	2
EGFP	g1	post	126	14492.6	1901.35	1.16701	2
EGFP	g1	post	111	20844.9	3249.67	0.981188	2
EGFP	g1	post	112	18601	2972.66	0.95701	2
EGFP	g1	post	131	18923.6	3063.01	0.944822	2
EGFP	g1	post	133	19611.6	2922.84	1.02662	2
EGFP	g1	post	119	13851.4	1834.11	1.15623	2
EGFP	g1	post	57	17518.9	2657.97	1.00836	2
EGFP	g1	post	69	15535.8	2691.3	0.88243	2
EGFP	g1	post	121	14079.2	2082.34	1.03454	2
EGFP	g1	post	70	16773.1	2639.84	0.97186	2
EGFP	g1	post	123	18199.1	2663.73	1.04546	2
EGFP	g1	post	53	17234.6	1827.22	1.44548	2
EGFP	g1	post	162	19986.2	2764.78	1.10649	2
EGFP	g1	post	144	12704	2031.42	0.956456	2
EGFP	g1	post	156	20717.7	3695.33	0.856864	2
EGFP	g1	post	75	11900.5	2085.37	0.872285	2
EGFP	g1	post	138	18120.9	2873.42	0.964559	2
EGFP	g1	post	139	10021.5	1450.62	1.05718	2
EGFP	g1	post	142	9090.18	1683.74	0.824918	2
EGFP	g1	post	59	23696.7	3298.82	1.09949	2
EGFP	g1	post	143	21326.2	2974.48	1.09739	2
EGFP	g1	post	78	15877.8	2037.89	1.19302	2
EGFP	g1	post	79	13870.5	2255.24	0.940546	2
EGFP	g1	post	115	18746.3	2392.17	1.19999	2
EGFP	g1	post	151	14994.7	2158.56	1.06307	2
EGFP	g1	post	116	16978.9	2378.38	1.09264	2
EGFP	g1	post	160	10795	1921.15	0.858796	2
EGFP	g1	post	89	18658.7	2613.11	1.09288	2
EGFP	g1	post	107	16041.8	2652.71	0.924698	2
EGFP	g1	post	90	10283.1	1444.42	1.08961	2
EGFP	g1	post	91	0.498913	1535.24	-0.00569443	2
EGFP	g1	post	161	18801.8	2502.84	1.15008	2
EGFP	g1	post	110	19383.1	2618.94	1.13299	2
EGFP	g1	post	101	22649.9	3642.27	0.951053	2
EGFP	g1	post	150	15321.6	2394.8	0.978633	2
EGFP	g1	post	137	16650.8	2662.55	0.95645	2
EGFP	g1	post	103	15580	2320.07	1.02747	2
EGFP	g1	post	159	11793.7	1530.01	1.18024	2
EGFP	g1	post	125	14342.8	2205.93	0.994642	2
EGFP	g1	post	124	19681.8	2695.1	1.11787	2
EGFP	g1	post	120	16183.6	2656.78	0.931484	2
EGFP	g1	post	130	16366.3	2658.92	0.941301	2
EGFP	g1	pre	11	16493.5	2704.91	1.05013	2
EGFP	g1	pre	23	15041.3	2325.94	1.11411	2
EGFP	g1	pre	37	9641.35	1635.98	1.01472	2
EGFP	g1	pre	30	16538.8	2562.06	1.11212	2
EGFP	g1	pre	15	17653.7	2929.47	1.03776	2
EGFP	g1	pre	68	20481.6	3383.12	1.04258	2
EGFP	g1	pre	52	11924.8	2023.79	1.01454	2
EGFP	g1	pre	35	21535.9	3839.87	0.965353	2
EGFP	g1	pre	4	12515.9	2244	0.959974	2
EGFP	g1	pre	7	19898.7	2920.91	1.17404	2
EGFP	g1	pre	20	17030.5	2742.63	1.06953	2
EGFP	g1	pre	27	11895.9	1833.74	1.11765	2
EGFP	g1	pre	39	13394.6	1914.11	1.20616	2
EGFP	g1	pre	6	18470.7	2917.36	1.09063	2
EGFP	g1	pre	18	18163.4	2805.85	1.11526	2
EGFP	g1	pre	54	21922.2	3742.17	1.00862	2
EGFP	g1	pre	72	14821.6	1766.52	1.44751	2
EGFP	g1	pre	21	28018	3762.18	1.28406	2
EGFP	g1	pre	13	18685.3	3067.39	1.04908	2
EGFP	g1	pre	28	9677.44	1721.43	0.967648	2
EGFP	g1	pre	46	11329.7	1757.63	1.11051	2
EGFP	g1	pre	62	17295	3049.97	0.976105	2
EGFP	g1	pre	33	16649.5	3021.75	0.948258	2
EGFP	g1	pre	84	22996.6	4063.09	0.974256	2
EGFP	g1	pre	1	16279.1	3923.22	0.712461	2
EGFP	g1	pre	126	10151.1	1778.76	0.982394	2
EGFP	g1	pre	14	15614.6	3162.53	0.849027	2
EGFP	g1	pre	73	10820.3	2129.74	0.873846	2
EGFP	g1	pre	38	23843.4	4465.44	0.918734	2
EGFP	g1	pre	95	10679.4	1740.69	1.05663	2
EGFP	g1	pre	132	19746.7	2942.73	1.15633	2
EGFP	g1	pre	56	14825.7	2507.64	1.01799	2
EGFP	g1	pre	74	15030.6	2391.41	1.08265	2
EGFP	g1	pre	96	14043.6	2848.09	0.847903	2
EGFP	g1	pre	135	9598.34	1544.79	1.07019	2
EGFP	g1	pre	57	11333.6	1911.01	1.02119	2
EGFP	g1	pre	75	12084.7	2119.01	0.981731	2
EGFP	g1	pre	76	16222.8	2719.23	1.02731	2
EGFP	g1	pre	99	17056.4	3011	0.975095	2
EGFP	g1	pre	146	10185.4	1810.39	0.968401	2
EGFP	g1	pre	78	20544.4	3122.22	1.13375	2
EGFP	g1	pre	102	10587.5	2023.17	0.900286	2
EGFP	g1	pre	80	17520.7	2614.41	1.15481	2
EGFP	g1	pre	106	11921.5	2219.26	0.92433	2
EGFP	g1	pre	136	19257.8	3248.55	1.02075	2
EGFP	g1	pre	82	20606.2	3330.42	1.06567	2
EGFP	g1	pre	109	20476.6	3031.67	1.16393	2
EGFP	g1	pre	172	15433.7	2856.57	0.929712	2
EGFP	g1	pre	51	9147.98	1875.89	0.838499	2
EGFP	g1	pre	180	10880.3	1884.3	0.994064	2
EGFP	g1	pre	123	9625.94	2059.92	0.803203	2
EGFP	g1	pre	182	14872	2604.52	0.982959	2
EGFP	g1	pre	91	12972.3	2226.04	1.00331	2
EGFP	g1	pre	125	9031.26	1381.53	1.12631	2
EGFP	g1	pre	36	13255	2033.75	1.12291	2
EGFP	g1	pre	187	23478.2	3790.35	1.06687	2
EGFP	g1	pre	93	11092.2	1824.28	1.04713	2
EGFP	g1	pre	189	18011.6	2849.13	1.08898	2
EGFP	g1	pre	94	10176.8	1823.68	0.960472	2
EGFP	g1	pre	130	9547.69	1528.3	1.07607	2
EGFP	g1	pre	192	16957.1	2907.01	1.0043	2
EGFP	g1	pre	131	13427.8	2230.86	1.03652	2
EGFP	g1	pre	194	24106.2	3642.61	1.1403	2
EGFP	g1	pre	134	14946.3	2425.22	1.06144	2
EGFP	g1	pre	200	18846.9	3041.15	1.06741	2
EGFP	g1	pre	203	15773.6	2628.58	1.03335	2
EGFP	g1	pre	139	14050.2	2290.58	1.05642	2
EGFP	g1	pre	207	17637.3	2751.24	1.10439	2
EGFP	g1	pre	142	13832.1	2425.83	0.981557	2
EGFP	g1	pre	213	15073.7	2481.24	1.04622	2
EGFP	g1	pre	101	8851.89	1770.03	0.860052	2
EGFP	g1	pre	147	15522.2	2886.42	0.925341	2
EGFP	g1	pre	217	8869.47	1515.12	1.0079	2
EGFP	g1	pre	150	17724	3177.54	0.960046	2
EGFP	g1	pre	151	11803.5	2113.7	0.961152	2
EGFP	g1	pre	153	13803.7	2557.92	0.928602	2
EGFP	g1	pre	105	13181.9	2009.96	1.12998	2
EGFP	g1	pre	154	13425.4	2236.04	1.03392	2
EGFP	g1	pre	156	11327.9	1718.05	1.13607	2
EGFP	g1	pre	107	14864.9	2429.1	1.05392	2
EGFP	g1	pre	157	13939.8	2603.47	0.921298	2
EGFP	g1	pre	83	15479.7	2366.37	1.12707	2
EGFP	g1	pre	161	15244.8	2496.14	1.05181	2
EGFP	g1	pre	162	18907.1	2716.12	1.19979	2
EGFP	g1	pre	164	12916.1	2119.05	1.04972	2
EGFP	g1	pre	66	16594.4	2512.72	1.13792	2
EGFP	g1	pre	166	12912.5	1864.72	1.19347	2
EGFP	g1	pre	113	9742.82	1840.75	0.910644	2
EGFP	g1	pre	168	16433.2	3214.55	0.87932	2
EGFP	g1	pre	67	18637.1	3347.83	0.958143	2
EGFP	g1	pre	115	10074.7	1635.64	1.06085	2
EGFP	g1	pre	170	15774.5	2977.11	0.911638	2
EGFP	g1	pre	117	17998.1	3512.47	0.881387	2
EGFP	g1	pre	174	17865.1	2883.32	1.06718	2
EGFP	g1	pre	176	15243.3	2693.91	0.974005	2
EGFP	g1	pre	16	16433.1	2146.46	1.32022	2
EGFP	g1	pre	181	14570.7	3439.09	0.727602	2
EGFP	g1	pre	183	15922.9	2844.76	0.963408	2
EGFP	g1	pre	184	8863.16	1451.83	1.05138	2
EGFP	g1	pre	186	8050.48	1644.17	0.841926	2
EGFP	g1	pre	188	10554.8	1873.02	0.969981	2
EGFP	g1	pre	190	14076.1	2630.53	0.92073	2
EGFP	g1	pre	195	13091.4	2355.24	0.95667	2
EGFP	g1	pre	97	11727.4	1947.8	1.03682	2
EGFP	g1	pre	202	17113.6	3596.87	0.817923	2
EGFP	g1	pre	138	13124.3	2151.49	1.05056	2
EGFP	g1	pre	205	8505.51	1490.4	0.982399	2
EGFP	g1	pre	141	12137.4	1828.32	1.14389	2
EGFP	g1	pre	208	16617.5	2461.92	1.16317	2
EGFP	g1	pre	215	10795.1	1825.39	1.01828	2
EGFP	g1	pre	218	13934.8	2508.03	0.956268	2
EGFP	g2	post	1	10803	1674.6	0.986825	2
EGFP	g2	post	2	16294.2	2556.7	0.974826	2
EGFP	g2	post	22	19073.2	2331.47	1.25295	2
EGFP	g2	post	59	12734.6	1847.39	1.05486	2
EGFP	g2	post	7	20386.3	3086.97	1.01035	2
EGFP	g2	post	60	20573.4	2982.54	1.05557	2
EGFP	g2	post	10	18331.1	2296.13	1.22259	2
EGFP	g2	post	12	12880	2046.27	0.962713	2
EGFP	g2	post	14	14049.7	2330.79	0.921699	2
EGFP	g2	post	69	13546.5	1984.96	1.04429	2
EGFP	g2	post	17	17250.3	2679.76	0.984691	2
EGFP	g2	post	124	21667.1	3796.08	0.872451	2
EGFP	g2	post	18	17296.5	2237.57	1.1836	2
EGFP	g2	post	94	8025.08	1616.11	0.758274	2
EGFP	g2	post	56	20882.8	3001.66	1.06467	2
EGFP	g2	post	98	10204.4	1788.75	0.87199	2
EGFP	g2	post	142	15775.5	2460.54	0.980712	2
EGFP	g2	post	25	18574.5	2663.39	1.06728	2
EGFP	g2	post	148	21989.1	3255.55	1.03348	2
EGFP	g2	post	79	21834.6	3554.56	0.939371	2
EGFP	g2	post	103	14828.4	1965.41	1.15508	2
EGFP	g2	post	26	14595.1	2429.14	0.918697	2
EGFP	g2	post	157	12620.9	1854.25	1.0415	2
EGFP	g2	post	46	16854.7	2771.95	0.929797	2
EGFP	g2	post	109	22718.6	3521.06	0.98699	2
EGFP	g2	post	65	18163.2	2763.58	1.00548	2
EGFP	g2	post	30	12144.2	1655.16	1.12315	2
EGFP	g2	post	66	20135.9	3843.52	0.800316	2
EGFP	g2	post	67	13372.8	2063.84	0.991201	2
EGFP	g2	post	116	13575.5	2367.55	0.876484	2
EGFP	g2	post	117	11810.7	1580.43	1.14407	2
EGFP	g2	post	88	12713.8	1785.16	1.09004	2
EGFP	g2	post	33	13896.8	2567.91	0.826901	2
EGFP	g2	post	51	20625.7	3189.74	0.989152	2
EGFP	g2	post	89	18982.6	3292.54	0.881309	2
EGFP	g2	post	70	13433.7	2325.11	0.883207	2
EGFP	g2	post	123	18120.3	2707.97	1.0238	2
EGFP	g2	post	53	13031.5	2751.03	0.723085	2
EGFP	g2	post	144	12336.5	2171.33	0.868421	2
EGFP	g2	post	129	14029	2140.73	1.00256	2
EGFP	g2	post	73	18358.3	2692.9	1.04316	2
EGFP	g2	post	38	19733.3	2457.71	1.22962	2
EGFP	g2	post	137	9294.09	1337.5	1.06341	2
EGFP	g2	post	40	17808.4	2795.22	0.974499	2
EGFP	g2	post	141	11617.8	1821.72	0.97548	2
EGFP	g2	post	99	18399.8	2718.62	1.03559	2
EGFP	g2	post	78	16093.5	2379.32	1.03495	2
EGFP	g2	post	166	22738.7	3775.91	0.920809	2
EGFP	g2	post	102	22755.7	3443.12	1.01112	2
EGFP	g2	post	171	19812.1	3442.51	0.879741	2
EGFP	g2	post	68	20511.1	3195.36	0.981887	2
EGFP	g2	post	154	12624.4	1786.53	1.0815	2
EGFP	g2	post	63	13698.1	2338.84	0.895379	2
EGFP	g2	post	156	13989.5	2061.04	1.03859	2
EGFP	g2	post	82	23984	3627.45	1.01155	2
EGFP	g2	post	162	13413.6	2066.54	0.99294	2
EGFP	g2	post	48	20213.8	2150.52	1.44046	2
EGFP	g2	post	114	18306.8	2948.07	0.949688	2
EGFP	g2	post	86	11015.1	3833.24	0.436384	2
EGFP	g2	post	95	20170	3015.57	1.02337	2
EGFP	g2	post	57	13432.9	2002.21	1.02651	2
EGFP	g2	post	92	5772.65	2498.58	0.34973	2
EGFP	g2	post	127	16123.9	2556.23	0.96476	2
EGFP	g2	post	147	17529.3	2934.98	0.913191	2
EGFP	g2	post	151	12805.8	1860.98	1.053	2
EGFP	g2	post	104	11528.2	1767.23	0.997931	2
EGFP	g2	post	152	10970.6	2296.94	0.72912	2
EGFP	g2	post	153	12182.9	1818.34	1.02512	2
EGFP	g2	post	160	12033.1	1878.45	0.979859	2
EGFP	g2	post	126	13798.4	2095.31	1.00748	2
EGFP	g2	post	167	12530.7	1760.83	1.08918	2
EGFP	g2	post	130	22802.2	3199.1	1.09092	2
EGFP	g2	post	132	11081.4	1589.63	1.06683	2
EGFP	g2	post	105	19451.8	2666.6	1.1166	2
EGFP	g2	post	155	14397.4	2399.31	0.917518	2
EGFP	g2	post	107	14195.7	2330.36	0.931515	2
EGFP	g2	post	108	12043.6	1661.49	1.10953	2
EGFP	g2	post	181	11887.9	1892.84	0.960567	2
EGFP	g2	post	112	9996.09	1506.34	1.01527	2
EGFP	g2	post	173	16318.7	2492.76	1.00149	2
EGFP	g2	post	121	21458.8	3453.4	0.950313	2
EGFP	g2	post	179	7606.86	1459.52	0.796158	2
EGFP	g2	post	91	12640.2	1718.22	1.12614	2
EGFP	g2	post	125	19633.4	3182.96	0.943309	2
EGFP	g2	post	150	19923.4	2971.87	1.02573	2
EGFP	g2	post	164	10939.6	1833.04	0.912492	2
EGFP	g2	post	101	13247.7	1961.2	1.03357	2
EGFP	g2	pre	72	12726.9	2330.95	0.939609	2
EGFP	g2	pre	31	10166.3	1599.85	1.09465	2
EGFP	g2	pre	39	17654	2448.85	1.24277	2
EGFP	g2	pre	17	22032.5	3385.27	1.12132	2
EGFP	g2	pre	26	15834.4	2515.27	1.0844	2
EGFP	g2	pre	68	18173.7	3811.93	0.819598	2
EGFP	g2	pre	16	12676.2	2321.93	0.939497	2
EGFP	g2	pre	5	16229.4	2639.11	1.05913	2
EGFP	g2	pre	6	11031.5	1981.87	0.958028	2
EGFP	g2	pre	41	16047.3	2729.6	1.01223	2
EGFP	g2	pre	13	16151.7	2271.98	1.22544	2
EGFP	g2	pre	60	18598.3	3005.38	1.06585	2
EGFP	g2	pre	14	11756.4	2065.86	0.979613	2
EGFP	g2	pre	59	11263.6	1821.49	1.06505	2
EGFP	g2	pre	95	7085.43	1618.37	0.752099	2
EGFP	g2	pre	75	15881	2699.45	1.01294	2
EGFP	g2	pre	90	15741.9	3178.16	0.851763	2
EGFP	g2	pre	23	18090.3	2297.07	1.35826	2
EGFP	g2	pre	92	10885.4	1659.77	1.12999	2
EGFP	g2	pre	19	16433.2	2639.03	1.07255	2
EGFP	g2	pre	20	13738.7	2117.46	1.11784	2
EGFP	g2	pre	27	12955	2457.27	0.907047	2
EGFP	g2	pre	10	16877.4	3097.81	0.937562	2
EGFP	g2	pre	2	10154.3	1734.5	1.00796	2
EGFP	g2	pre	69	10936.5	2035.11	0.924688	2
EGFP	g2	pre	34	12071.5	2620.7	0.791632	2
EGFP	g2	pre	70	18415	3268.31	0.969844	2
EGFP	g2	pre	127	14213.9	2634.88	0.928261	2
EGFP	g2	pre	93	5971.72	2530.07	0.40236	2
EGFP	g2	pre	56	20001.2	3025.51	1.13909	2
EGFP	g2	pre	96	16625.8	2762.16	1.03652	2
EGFP	g2	pre	4	10421.8	1714.85	1.04662	2
EGFP	g2	pre	120	10839.2	2277.95	0.817991	2
EGFP	g2	pre	57	11731.9	1980.13	1.02017	2
EGFP	g2	pre	98	8358.83	1750.6	0.820859	2
EGFP	g2	pre	104	19673.4	3419.28	0.990513	2
EGFP	g2	pre	80	13869.1	2384.05	1.00157	2
EGFP	g2	pre	81	20326.1	3537.38	0.989198	2
EGFP	g2	pre	109	12010.8	2268.65	0.91088	2
EGFP	g2	pre	84	20919.1	3681.09	0.978239	2
EGFP	g2	pre	48	17767.9	2080.23	1.47368	2
EGFP	g2	pre	66	15085.9	2761.2	0.940227	2
EGFP	g2	pre	113	18578.5	3553.37	0.899477	2
EGFP	g2	pre	49	15702.7	2736.86	0.987705	2
EGFP	g2	pre	115	8449.53	1488.53	0.977123	2
EGFP	g2	pre	15	11785.4	1812.95	1.11998	2
EGFP	g2	pre	173	9210.19	1831.14	0.865043	2
EGFP	g2	pre	174	11948.2	3292.69	0.622207	2
EGFP	g2	pre	176	10146.7	1719.46	1.01607	2
EGFP	g2	pre	89	10992.7	1820.29	1.03997	2
EGFP	g2	pre	121	9525.92	1521.43	1.07847	2
EGFP	g2	pre	183	16791.4	3500.1	0.824771	2
EGFP	g2	pre	125	18851.1	3418.39	0.949081	2
EGFP	g2	pre	71	11568.8	1952.21	1.02038	2
EGFP	g2	pre	185	12806.7	2423.13	0.909316	2
EGFP	g2	pre	54	11739.6	2742.36	0.735237	2
EGFP	g2	pre	128	17292.2	3803.69	0.781225	2
EGFP	g2	pre	129	17206.5	3225.83	0.91777	2
EGFP	g2	pre	131	11400	2108.61	0.930322	2
EGFP	g2	pre	132	12771.8	2437.11	0.90158	2
EGFP	g2	pre	133	19639	3729.55	0.905952	2
EGFP	g2	pre	134	10909	2044.33	0.918161	2
EGFP	g2	pre	137	9610.26	1572.76	1.05235	2
EGFP	g2	pre	140	9847.15	1709.98	0.991375	2
EGFP	g2	pre	142	9097.19	1496.02	1.04724	2
EGFP	g2	pre	77	23667.2	4867.64	0.835989	2
EGFP	g2	pre	100	15497.4	2653.15	1.00567	2
EGFP	g2	pre	144	8148.4	1316.65	1.06592	2
EGFP	g2	pre	103	12458	1948.21	1.1016	2
EGFP	g2	pre	150	9593.47	1756.44	0.939941	2
EGFP	g2	pre	152	10267.2	2036.61	0.867047	2
EGFP	g2	pre	105	12344.2	1936.24	1.09827	2
EGFP	g2	pre	155	14824.7	2889.28	0.882579	2
EGFP	g2	pre	106	10203.5	1775.06	0.989572	2
EGFP	g2	pre	156	19823.7	3229.52	1.05718	2
EGFP	g2	pre	107	14789.8	2557.38	0.995631	2
EGFP	g2	pre	158	17373.6	3012.39	0.99289	2
EGFP	g2	pre	64	11720.6	2304.04	0.874957	2
EGFP	g2	pre	159	10378.4	1826.66	0.978022	2
EGFP	g2	pre	160	15858	2469.33	1.10635	2
EGFP	g2	pre	161	10208.8	1817.29	0.966932	2
EGFP	g2	pre	110	10189.4	1630.52	1.0764	2
EGFP	g2	pre	162	10085.6	1734.46	1.00111	2
EGFP	g2	pre	163	12354.1	2385.02	0.891059	2
EGFP	g2	pre	111	20592.4	3075.47	1.15379	2
EGFP	g2	pre	165	11948.5	2062.54	0.997343	2
EGFP	g2	pre	166	10190.4	1780.32	0.985361	2
EGFP	g2	pre	167	20560.5	3592.78	0.985149	2
EGFP	g2	pre	169	9813.52	1845.01	0.915164	2
EGFP	g2	pre	171	11571.7	2083.07	0.956099	2
EGFP	g2	pre	118	15912.6	3007.63	0.910279	2
EGFP	g2	pre	51	19058	3194.35	1.02734	2
EGFP	g2	pre	177	18921.2	3835.65	0.84827	2
EGFP	g2	pre	181	10685.4	2006.29	0.916384	2
EGFP	g2	pre	91	20305.3	3986.88	0.876008	2
EGFP	g2	pre	192	5682.02	1439.94	0.677203	2
EGFP	g2	pre	135	19227.9	3229.19	1.02531	2
GCaMP3	g1	post	1	16567.7	4981.42	0.505978	2
GCaMP3	g1	post	19	5377.35	1764.54	0.463136	2
GCaMP3	g1	post	2	12269.9	3793.28	0.491938	2
GCaMP3	g1	post	55	7223.26	2149.98	0.511177	2
GCaMP3	g1	post	20	8693.25	2359.61	0.561105	2
GCaMP3	g1	post	3	7374.86	1909.48	0.5885	2
GCaMP3	g1	post	4	7222.34	2918.6	0.374996	2
GCaMP3	g1	post	5	6659.87	2123.87	0.476718	2
GCaMP3	g1	post	40	8985.67	3127.69	0.436287	2
GCaMP3	g1	post	6	4217.11	1468.62	0.436063	2
GCaMP3	g1	post	41	9880.1	3128.29	0.480192	2
GCaMP3	g1	post	7	4873.06	2044.49	0.360982	2
GCaMP3	g1	post	60	7316.07	2933.62	0.377963	2
GCaMP3	g1	post	25	8273.16	3164.42	0.396513	2
GCaMP3	g1	post	8	6414.1	2032.86	0.479717	2
GCaMP3	g1	post	44	10943.5	3046.56	0.546934	2
GCaMP3	g1	post	27	6406.7	2467.7	0.393711	2
GCaMP3	g1	post	10	12125.2	3919.13	0.470277	2
GCaMP3	g1	post	45	5683.07	2243.49	0.384004	2
GCaMP3	g1	post	11	8679.09	2898.98	0.454888	2
GCaMP3	g1	post	12	6445.97	1967.88	0.498239	2
GCaMP3	g1	post	13	11780.5	3794.1	0.471981	2
GCaMP3	g1	post	31	6229.78	2239.92	0.42218	2
GCaMP3	g1	post	14	11808.5	3440.61	0.522317	2
GCaMP3	g1	post	15	14820.9	4245.94	0.531322	2
GCaMP3	g1	post	33	6809.94	3314.94	0.310333	2
GCaMP3	g1	post	17	3831.19	1340.27	0.434067	2
GCaMP3	g1	post	70	5603.76	1688.73	0.504814	2
[truncated: 1,412 more rows]
