# Supplementary material for: A green lifetime biosensor for calcium that remains bright over its full dynamic range
Source: eLife. 2025 Dec 19;14:RP105086. doi: 10.7554/eLife.105086 (PMC12716836; doi:10.7554/eLife.105086)
Supplement: Figure 5—source data 1. [file elife-105086-fig5-data1.xlsx]

## Sheet: figure5 and S11
G-Ca-FLITS									Tq-Ca-FLITS
replicate	cell	state	Intensity	tphi (ps)	SNR_tphi	tmod (ps) (figure S11)	SNR_tmod (figure S11)		replicate	cell	state	Intensity	tphi (ps)	SNR_tphi	tmod (ps) (figure S11)	SNR_tmod (figure S11)
1	1	resting cell	13329.1	3067.24	14.646	3569.97	13.5905		2	1	resting cell	4377.01	1313.69	5.76101	1544.19	2.46072
1	1	ionomycin	11515.5	1973.39	12.971	2522.64	9.96648		2	1	ionomycin	12564	2533.36	14.6294	2721.81	11.5016
1	2	resting cell	4978.26	2891.61	8.2192	3584.12	9.37098		2	4	resting cell	3182.15	1347.81	5.10863	1590.52	2.30477
1	2	ionomycin	4870.87	2004.12	7.29432	2627.13	6.75638		2	4	ionomycin	10355.6	2550.19	12.844	2728.09	8.83196
1	3	resting cell	4590.92	2835.73	7.81921	3610.29	7.93947		2	5	resting cell	2616.92	1353.73	4.75175	1606.32	2.04466
1	3	ionomycin	4131.27	1956.87	6.57618	2617.2	5.17971		2	5	ionomycin	7658.56	2580.58	10.7486	2765.47	8.29508
1	4	resting cell	5575.9	2972.06	9.22426	3662.56	8.98951		3	1	resting cell	3473.91	1344.21	5.57688	1736.18	2.64235
1	4	ionomycin	5743.5	2004.8	8.34704	2683.74	6.59971		3	1	ionomycin	9669.36	2566.68	12.7191	2754.58	9.37401
1	5	resting cell	7536.55	3030.99	10.7401	3588.82	10.0734		3	2	resting cell	3824.19	1425.21	6.02064	1685.81	2.70084
1	5	ionomycin	6352.94	1965.94	9.01701	2550.75	6.94857		3	2	ionomycin	10693.3	2613.29	13.6175	2786.2	10.2949
1	6	resting cell	7267.56	2954.13	11.1265	3596.94	10.7885		3	3	resting cell	2898.41	1461.49	5.29187	1823.81	2.58139
1	6	ionomycin	6114.76	1938.42	9.11014	2596.46	7.30515		3	3	ionomycin	8031.73	2581.75	10.8786	2795.88	9.32359
1	7	resting cell	9491.58	3007.15	11.4521	3558.78	11.7713		4	2	resting cell	3555.41	1444.38	5.80698	1825.76	2.98126
1	7	ionomycin	9132.5	1972.16	11.1061	2523.67	8.53239		4	2	ionomycin	11040.5	2715	13.4683	2832.24	10.7876
1	8	resting cell	8940.58	3032.67	11.8911	3590.24	12.1128		4	3	resting cell	2741.56	1494.86	4.81252	1804.92	2.72074
1	8	ionomycin	7763.95	1955.07	10.1514	2518.12	7.41084		4	3	ionomycin	7830.15	2710.75	10.8551	2822.31	8.67665
1	9	resting cell	5676.22	2939.89	9.15732	3618.39	9.06288		4	4	resting cell	3819.84	1392.82	6.00615	1716.85	2.92684
1	9	ionomycin	4980.72	1960.21	7.77453	2634.09	6.2515		4	4	ionomycin	11213.1	2692.89	14.6024	2852.08	11.0395
1	10	resting cell	4977.05	2892.35	7.71365	3617.67	8.1362
1	10	ionomycin	4404.48	1949.33	6.3253	2622.16	5.93868
1	11	resting cell	4832.46	2903.86	8.40279	3536.92	8.33234
1	11	ionomycin	4269.27	1996.15	7.73334	2521.15	5.17313
2	1	resting cell	8414.34	3041.91	10.7849	3685.65	10.7363
2	1	ionomycin	6965.67	2025.44	8.84418	2570.21	7.73772
2	2	resting cell	4541.17	3010.97	8.42214	3759.26	7.8331
2	2	ionomycin	3824.41	1941.87	6.63419	2641.7	4.94714
2	3	resting cell	8003.31	2990.73	10.3223	3691.66	10.0127
2	3	ionomycin	6498.77	1953.12	8.89551	2630.68	7.57911
2	4	resting cell	3946.99	2826.7	6.70128	3675.49	6.68571
2	4	ionomycin	3196.13	1917.1	6.39943	2619.19	4.39337
2	5	resting cell	4792.3	3036.53	8.8815	3778.41	8.24792
2	5	ionomycin	4086.18	2003.84	7.00083	2637.16	5.89139
2	6	resting cell	7859.79	2994.74	9.64437	3665.32	9.75203
2	6	ionomycin	6436.27	1983.99	8.26893	2574.16	6.60894
2	7	resting cell	4243	2911.16	7.56561	3712.16	6.80205
2	7	ionomycin	3578.5	1852.17	6.66757	2668.34	6.04049
