# Supplementary material for: A green lifetime biosensor for calcium that remains bright over its full dynamic range
Source: eLife. 2025 Dec 19;14:RP105086. doi: 10.7554/eLife.105086 (PMC12716836; doi:10.7554/eLife.105086)
Supplement: Figure 6—source data 1. [file elife-105086-fig6-data1.xlsx]

## Sheet: figure6 and S15
Calcium in Hela cells (figure 6C, S15)									Calcium in BOECs (figure 6D, S15)									Timelapse calcium in cytosol Hela cells (figure 6E)								Timelapse calcium in mitochondria Hela cells (figure 6F)
tag	glass	image	cell	state	tphi (ns) (figure S15)	tmod (ns) (figure S15)	free Ca2+ (uM)		tag	glass	image	cell	state	tphi (ns) (figure S15)	tmod (ns) (figure S15)	free Ca2+ (uM)		cell	state	time (s)	intensity	tphi (ns)	tmod (ns)	free Ca2+ (uM)		cell	state	time (s)	intensity	tphi (ns)	tmod (ns)	free Ca2+ (uM)
cytosol	1	1	1	no stim.	2.79944	3.58268	0.0503678		cytosol	1	1	1	no stim.	2.91432	3.32239	0.04927		1	no stim.	0	2578.17	2.85577	3.36492	0.0592289		2	no stim.	0	2719.89	2.69577	3.24867	0.10915
cytosol	1	1	2	no stim.	2.88467	3.51775	0.0355994		cytosol	1	1	3	no stim.	2.81132	3.26947	0.079343		1	no stim.	5.832	2581.93	2.8371	3.3937	0.0607802		2	no stim.	4.502	2737.11	2.72183	3.31226	0.0962173
cytosol	1	1	3	no stim.	2.80185	3.53062	0.0552136		cytosol	1	1	4	no stim.	2.83034	3.28783	0.0730216		1	no stim.	11.678	2575.59	2.8342	3.34314	0.0665728		2	no stim.	9.049	2728.83	2.70464	3.26761	0.104988
cytosol	1	1	4	no stim.	2.73871	3.50358	0.0728573		cytosol	1	1	5	no stim.	2.86025	3.35951	0.0587009		1	no stim.	17.472	2580.39	2.88871	3.41711	0.0456983		2	no stim.	13.571	2726.96	2.66988	3.25916	0.114433
cytosol	1	1	5	no stim.	2.79367	3.51373	0.0589116		cytosol	1	1	6	no stim.	2.9295	3.33656	0.0439128		1	no stim.	23.199	2578.92	2.86333	3.43197	0.0504801		2	no stim.	18.116	2723.87	2.7261	3.2401	0.102644
cytosol	1	1	6	no stim.	2.8759	3.49745	0.0402432		cytosol	1	1	7	no stim.	2.91197	3.34079	0.0479269		1	no stim.	28.98	2574.08	2.87593	3.42439	0.0481428		2	no stim.	22.586	2729.55	2.73105	3.28822	0.0964843
cytosol	1	1	10	no stim.	2.95434	3.50285	0.0157601		cytosol	1	1	8	no stim.	2.88785	3.33672	0.0543334		1	no stim.	34.785	2565.2	2.85093	3.39729	0.0570934		2	no stim.	27.132	2739.63	2.7413	3.31287	0.0915222
cytosol	1	1	11	no stim.	2.91368	3.53697	0.0248152		cytosol	1	1	9	no stim.	2.81575	3.2845	0.0767971		1	no stim.	40.614	2579.31	2.87751	3.39618	0.0507152		2	no stim.	31.658	2719.06	2.70745	3.29288	0.101671
cytosol	1	2	1	no stim.	2.80192	3.52032	0.0562607		cytosol	1	1	10	no stim.	2.76749	3.35761	0.0808249		1	no stim.	46.351	2573.43	2.83322	3.41066	0.0599867		2	no stim.	36.189	2715.17	2.72969	3.25761	0.0999614
cytosol	1	2	2	no stim.	2.7932	3.51599	0.0587917		cytosol	1	2	1	no stim.	2.77626	3.24482	0.0901211		1	no stim.	52.12	2573.24	2.85371	3.421	0.0539803		2	no stim.	40.646	2727.23	2.75558	3.24837	0.0946947
cytosol	1	2	4	no stim.	2.82599	3.52345	0.0500858		cytosol	1	2	2	no stim.	2.85912	3.2812	0.0668659		1	no stim.	57.831	2566.36	2.86249	3.35361	0.0587606		2	no stim.	45.16	2734.63	2.74899	3.27272	0.0937839
cytosol	1	3	1	no stim.	2.81721	3.57147	0.0471669		cytosol	1	2	3	no stim.	2.8348	3.27835	0.0729147		1	no stim.	63.754	2571.96	2.8309	3.40522	0.0610923		2	no stim.	49.654	2726.8	2.71842	3.30331	0.0979535
cytosol	1	3	2	no stim.	2.65704	3.62853	0.0791372		cytosol	1	2	4	no stim.	2.83856	3.30774	0.0690877		1	no stim.	69.545	2555.54	2.93542	3.42374	0.032504		2	no stim.	54.175	2717.77	2.75054	3.29769	0.0908741
cytosol	1	3	3	no stim.	2.67748	3.57406	0.0799408		cytosol	1	2	5	no stim.	2.80941	3.28322	0.0784189		1	histamine	75.577	2360.01	1.98291	2.59718	1.07703		2	no stim.	58.766	2727.16	2.71795	3.33177	0.0951394
cytosol	1	3	4	no stim.	2.68321	3.55534	0.080512		cytosol	1	2	6	no stim.	2.83846	3.29074	0.0708115		1	histamine	81.546	2462.02	2.3788	3.08047	0.226928		2	no stim.	63.332	2716.23	2.75905	3.29613	0.0890134
cytosol	1	3	5	no stim.	2.83723	3.55264	0.0441588		cytosol	1	2	7	no stim.	2.72066	3.19978	0.108188		1	histamine	87.683	2480.87	2.53004	3.15464	0.164493		2	no stim.	67.804	2727.37	2.73472	3.33033	0.0913035
cytosol	1	3	6	no stim.	2.79029	3.56944	0.0539779		cytosol	1	2	8	no stim.	2.89621	3.26717	0.059388		1	histamine	93.547	2440.16	2.3542	2.99941	0.252203		2	histamine	72.283	2728.94	2.74764	3.31538	0.0897648
cytosol	1	3	7	no stim.	2.58501	3.44587	0.115213		cytosol	1	2	9	no stim.	2.85748	3.28279	0.0670959		1	histamine	99.48	2447.75	2.41401	3.12052	0.207088		2	histamine	76.897	2730.04	2.77373	3.20036	0.0952373
cytosol	1	3	8	no stim.	2.72401	3.57898	0.068662		cytosol	1	3	1	no stim.	2.80778	3.28563	0.0785622		1	histamine	105.281	2450.07	2.4931	3.11563	0.18115		2	histamine	81.467	2628.87	2.07884	2.68979	0.612916
cytosol	1	3	9	no stim.	2.83753	3.52836	0.0466982		cytosol	1	3	2	no stim.	2.76708	3.27722	0.0890254		1	histamine	111.136	2424.23	2.44767	2.97626	0.218213		2	histamine	85.905	2613.15	1.99682	2.52257	1.22231
cytosol	1	3	10	no stim.	2.75552	3.58972	0.0601885		cytosol	1	3	3	no stim.	2.82409	3.33587	0.0696927		1	histamine	116.926	2417.24	2.3679	3.00786	0.244631		2	histamine	90.469	2603.33	2.01599	2.56071	0.983543
cytosol	1	3	11	no stim.	2.86179	3.53205	0.0400901		cytosol	1	3	4	no stim.	2.82936	3.28111	0.0739238		1	histamine	122.702	2422.11	2.41179	3.06855	0.216358		2	histamine	95.108	2596.76	2.06259	2.59417	0.749324
cytosol	1	4	1	no stim.	2.82753	3.44482	0.0578623		cytosol	1	3	5	no stim.	2.82224	3.32226	0.0714923		1	histamine	128.429	2415.81	2.41373	3.05538	0.217827		2	histamine	99.523	2624.6	2.02338	2.57687	0.91408
cytosol	1	4	2	no stim.	2.8425	3.5152	0.0468595		cytosol	1	3	6	no stim.	2.82167	3.29599	0.0742524		1	histamine	134.13	2418.06	2.40308	3.06066	0.220972		2	histamine	104.055	2606.17	2.02927	2.58931	0.866807
cytosol	1	4	3	no stim.	2.86496	3.42538	0.0507653		cytosol	1	3	7	no stim.	2.76884	3.3412	0.0821591		1	histamine	139.865	2421.8	2.45267	3.08597	0.198911		2	histamine	108.55	2616.82	2.04397	2.6042	0.791606
cytosol	1	4	4	no stim.	2.76721	3.35255	0.0814		cytosol	1	3	8	no stim.	2.83661	3.29815	0.0705076		1	histamine	145.588	2425.37	2.52045	3.09237	0.175738		2	histamine	113.023	2610.45	2.06369	2.64396	0.688312
cytosol	1	4	5	no stim.	2.92904	3.45653	0.0303899		cytosol	1	3	9	no stim.	2.85685	3.31855	0.0636583		1	histamine	151.459	2427.7	2.42981	3.03406	0.215351		2	histamine	117.493	2628.99	2.10989	2.71261	0.544285
cytosol	1	4	6	no stim.	2.89116	3.45051	0.0414435		cytosol	1	3	10	no stim.	2.7768	3.25381	0.0890841		1	histamine	157.201	2418.98	2.46358	3.08553	0.195242		2	histamine	121.904	2630.51	2.13541	2.77167	0.47616
cytosol	2	1	1	no stim.	3.01346	3.55311	0.0129564		cytosol	1	3	11	no stim.	2.80459	3.23635	0.0842499		1	histamine	163.001	2436.98	2.51179	3.19199	0.165025		2	histamine	126.37	2629.76	2.16441	2.76145	0.449531
cytosol	2	1	2	no stim.	2.94803	3.50458	0.0178529		cytosol	1	3	12	no stim.	2.80882	3.2599	0.0808907		1	histamine	168.803	2461.45	2.67038	3.22455	0.11805		2	histamine	130.817	2626	2.17111	2.78236	0.433291
cytosol	2	1	3	no stim.	2.93836	3.55045	0.0141737		cytosol	1	3	13	no stim.	2.61945	3.16209	0.13832		1	histamine	174.643	2396.42	2.34946	2.94322	0.265788		2	histamine	135.331	2632.94	2.20026	2.83294	0.387243
cytosol	2	1	4	no stim.	2.92462	3.57409	0.0156662		cytosol	1	3	14	no stim.	2.84034	3.30469	0.0689713		1	histamine	180.406	2415.58	2.34079	3.11087	0.236636		2	histamine	139.831	2626.4	2.15675	2.70646	0.485677
cytosol	2	1	5	no stim.	2.94767	3.60452	0.0129564		cytosol	1	4	1	no stim.	2.87269	3.30599	0.0611343		1	histamine	186.222	2494.28	2.79581	3.40354	0.0695656		2	histamine	144.283	2626.73	2.16214	2.81474	0.427798
cytosol	2	1	7	no stim.	2.83854	3.56646	0.0423151		cytosol	1	4	2	no stim.	2.94119	3.32423	0.0422149		1	histamine	191.984	2476.18	2.76	3.28579	0.0898364		2	histamine	148.794	2643.9	2.19722	2.83402	0.389306
cytosol	2	1	8	no stim.	3.02546	3.55253	0.0129564		cytosol	1	4	3	no stim.	2.86015	3.32993	0.0617229		1	histamine	197.733	2358.33	2.16335	2.85061	0.411682		2	histamine	153.288	2628.94	2.20513	2.83733	0.381781
cytosol	2	2	1	no stim.	2.99255	3.57594	0.0129564		cytosol	1	4	4	no stim.	2.84488	3.33087	0.0652696		1	histamine	203.542	2446.25	2.53826	3.22667	0.152925		2	histamine	157.748	2661.22	2.2234	2.86597	0.358423
cytosol	2	2	2	no stim.	2.87002	3.45297	0.0465914		cytosol	1	4	5	no stim.	2.83635	3.29718	0.070667		1	histamine	209.364	2510.91	2.88668	3.49139	0.0380685		2	histamine	162.299	2660.07	2.22198	2.88057	0.354761
cytosol	2	3	1	no stim.	3.06724	3.58175	0.0129564		cytosol	1	4	6	no stim.	2.88916	3.28645	0.0591419		1	histamine	215.226	2496.31	2.86429	3.40573	0.0529757		2	histamine	166.712	2666.36	2.28803	2.89428	0.309024
cytosol	2	3	2	no stim.	3.0536	3.58161	0.0129564		cytosol	1	4	7	no stim.	2.86643	3.3045	0.0627846		1	histamine	221.04	2362.82	2.29221	2.83152	0.323158		2	histamine	171.194	2656.46	2.27528	2.88982	0.317653
cytosol	2	3	3	no stim.	2.83776	3.4731	0.0524693		cytosol	1	4	8	no stim.	2.86723	3.30537	0.0625059		1	histamine	226.837	2429.28	2.36498	3.1667	0.217387		2	histamine	175.686	2653.85	2.23092	2.9005	0.342516
cytosol	2	3	4	no stim.	2.85712	3.51725	0.0429314		cytosol	1	4	9	no stim.	2.86082	3.33927	0.0606182		1	histamine	232.632	2510.18	2.86913	3.50641	0.0410173		2	histamine	180.181	2671.44	2.27534	2.90229	0.314305
cytosol	2	3	5	no stim.	2.93166	3.56117	0.0150454		cytosol	2	1	1	no stim.	2.84487	3.21579	0.0767636		1	histamine	238.468	2514.01	2.94428	3.52527	0.0160117		2	histamine	184.701	2651.96	2.31739	2.89824	0.29184
cytosol	2	3	6	no stim.	2.94849	3.55795	0.0129564		cytosol	2	1	2	no stim.	2.80633	3.21165	0.0863121		1	histamine	244.22	2481.03	2.78491	3.3148	0.0810301		2	histamine	189.196	2662.32	2.28031	2.92674	0.305136
cytosol	2	4	1	no stim.	2.89318	3.54315	0.0301929		cytosol	2	1	3	no stim.	2.7668	3.22774	0.0941109		1	histamine	249.97	2370.01	2.16993	2.88826	0.391432		2	histamine	193.64	2655.56	2.37074	2.93866	0.256899
cytosol	2	4	3	no stim.	2.81531	3.4218	0.0631221		cytosol	2	1	4	no stim.	2.8127	3.273	0.0786661		1	histamine	255.801	2500.25	2.74525	3.42432	0.0793179		2	histamine	198.171	2675.65	2.3854	3.01104	0.236715
cytosol	2	4	4	no stim.	2.95081	3.48428	0.0198912		cytosol	2	1	5	no stim.	2.84796	3.25863	0.0717667		1	histamine	261.642	2521.4	2.96034	3.54156	0.0129564		2	histamine	202.618	2680.28	2.43289	2.98771	0.221938
cytosol	2	4	6	no stim.	2.86041	3.49258	0.0447716		cytosol	2	1	6	no stim.	2.83883	3.21713	0.0780598		1	histamine	267.437	2512.71	2.91187	3.49044	0.0312256		2	histamine	207.111	2671.65	2.40294	2.99775	0.231985
cytosol	2	4	8	no stim.	2.89443	3.47777	0.0375369		cytosol	2	1	7	no stim.	2.84883	3.17228	0.0801507		1	histamine	273.096	2430.86	2.64415	3.10978	0.137745		2	histamine	211.628	2668.84	2.39384	3.02023	0.231629
cytosol	2	4	9	no stim.	2.99917	3.5406	0.0129564		cytosol	2	2	1	no stim.	2.78751	3.22577	0.0893671		1	histamine	279.013	2419.88	2.36898	3.12563	0.222873		2	histamine	216.194	2675.31	2.38419	3.02246	0.235131
cytosol	2	4	11	no stim.	2.89425	3.55631	0.028245		cytosol	2	2	2	no stim.	2.77516	3.30708	0.0841034		1	histamine	284.797	2523.69	2.86907	3.52716	0.0387183		2	histamine	220.696	2678.55	2.38815	3.06956	0.225187
cytosol	2	5	1	no stim.	2.8034	3.53886	0.0539861		cytosol	2	2	3	no stim.	2.76149	3.28356	0.0897092		1	histamine	290.629	2519.21	2.90042	3.57071	0.0244971		2	histamine	225.119	2679.52	2.42505	3.08716	0.20846
cytosol	2	5	2	no stim.	2.84274	3.6151	0.0357309		cytosol	2	2	4	no stim.	2.68527	3.20034	0.116929		1	histamine	296.39	2516.57	2.9338	3.48552	0.0252988		2	histamine	229.612	2670.75	2.46236	3.02353	0.205178
cytosol	2	5	3	no stim.	2.82109	3.48395	0.0553927		cytosol	2	2	5	no stim.	2.80588	3.23233	0.0843466		1	histamine	302.133	2406.78	2.45988	3.02839	0.2053		2	histamine	234.093	2676.35	2.4419	3.03995	0.209939
cytosol	2	5	4	no stim.	2.84389	3.52451	0.045512		cytosol	2	2	6	no stim.	2.86544	3.18972	0.0744747		1	histamine	307.875	2452	2.48338	3.32705	0.155836		2	histamine	238.667	2677.51	2.44673	3.0524	0.206216
cytosol	2	5	5	no stim.	2.80754	3.52212	0.0547218		cytosol	2	2	7	no stim.	2.85365	3.2349	0.0727828		1	histamine	313.685	2523.98	2.95159	3.54075	0.0129564		2	histamine	243.225	2683.22	2.48344	3.02911	0.196941
cytosol	2	5	6	no stim.	2.92703	3.55494	0.0177864		cytosol	2	2	8	no stim.	2.82094	3.28339	0.075685		1	histamine	319.452	2520.72	2.94449	3.52869	0.015375		2	histamine	247.708	2675.25	2.49284	3.09957	0.183503
cytosol	2	5	7	no stim.	2.91036	3.52178	0.0277972		cytosol	2	2	9	no stim.	2.81082	3.26076	0.0803334		1	histamine	325.255	2509.03	2.90423	3.49594	0.0327357		2	histamine	252.199	2684.56	2.49018	3.14373	0.178144
cytosol	2	5	8	no stim.	2.70285	3.40509	0.0912077		cytosol	2	2	10	no stim.	2.87056	3.27086	0.0651752		1	histamine	331.086	2412.42	2.43655	2.97515	0.222656		2	histamine	256.669	2689.22	2.49978	3.14283	0.175266
cytosol	2	5	9	no stim.	2.76998	3.57778	0.0579824		cytosol	2	2	11	no stim.	2.84645	3.22278	0.0756951		1	histamine	336.878	2449.39	2.47648	3.34679	0.155283		2	histamine	261.196	2701.25	2.53189	3.11602	0.169026
cytosol	2	5	10	no stim.	2.76714	3.51088	0.0654738		cytosol	2	2	12	no stim.	2.78036	3.2491	0.0887147		1	histamine	342.659	2530.98	2.92407	3.47592	0.0294597		2	histamine	265.662	2696.83	2.55353	3.12058	0.161955
cytosol	3	1	1	no stim.	2.90464	3.46506	0.0362273		cytosol	2	2	13	no stim.	2.79606	3.26634	0.0832605		1	histamine	348.357	2514.21	2.96941	3.53446	0.0129564		2	histamine	270.142	2687.99	2.55099	3.15827	0.157882
cytosol	3	1	2	no stim.	2.95261	3.46294	0.0223054		cytosol	2	3	1	no stim.	2.80277	3.26086	0.0822241		1	histamine	354.08	2523.4	2.89813	3.51947	0.0316496		2	histamine	274.671	2701.6	2.5644	3.16844	0.152763
cytosol	3	1	3	no stim.	2.75058	3.43895	0.0766005		cytosol	2	3	2	no stim.	2.77992	3.20197	0.0935894		1	histamine	359.797	2485.99	2.85175	3.34544	0.062166		2	histamine	279.174	2704.95	2.61018	3.12923	0.144726
cytosol	3	1	4	no stim.	2.59156	3.23921	0.136797		cytosol	2	3	3	no stim.	2.75978	3.2419	0.0943495		1	histamine	365.649	2396.21	2.22693	2.94524	0.331944		2	histamine	283.605	2702.25	2.5964	3.23887	0.135548
cytosol	3	1	5	no stim.	2.92116	3.49423	0.0280401		cytosol	2	3	4	no stim.	2.79912	3.2525	0.0839255		1	histamine	371.448	2523.55	2.85491	3.53496	0.0415578		2	histamine	288.118	2700.62	2.55698	3.19978	0.150983
cytosol	3	2	1	no stim.	2.87068	3.42664	0.0492153		cytosol	2	3	5	no stim.	2.79133	3.25043	0.0859789		1	histamine	377.197	2516.7	2.91894	3.51935	0.0254922		2	histamine	292.58	2705.53	2.55183	3.23747	0.147794
cytosol	3	2	2	no stim.	2.85124	3.46218	0.0502983		cytosol	2	3	6	no stim.	2.84914	3.26147	0.0712029		1	histamine	383.079	2531.43	2.9419	3.5631	0.0129564		2	histamine	297.046	2713.21	2.58668	3.20777	0.141806
cytosol	3	2	3	no stim.	2.82707	3.42112	0.0603904		cytosol	2	3	7	no stim.	2.76809	3.23094	0.0934766		1	histamine	388.861	2513.67	2.88203	3.53476	0.0343463		2	histamine	301.513	2697.03	2.60887	3.16983	0.14027
cytosol	3	3	1	no stim.	2.8324	3.39065	0.0622124		cytosol	2	3	8	no stim.	2.80021	3.26068	0.0828478		1	histamine	394.643	2487.21	2.87112	3.37511	0.05447		2	histamine	305.995	2715.27	2.64321	3.20619	0.127008
cytosol	3	3	2	no stim.	2.84629	3.45832	0.051921		cytosol	2	3	9	no stim.	2.77964	3.21818	0.0920128		1	histamine	400.447	2396.7	2.28839	3.00744	0.281475		2	histamine	310.441	2708.1	2.59991	3.21824	0.137013
cytosol	3	3	3	no stim.	2.86743	3.44462	0.0481284		cytosol	2	3	10	no stim.	2.83714	3.24692	0.0754936		1	histamine	406.226	2521.91	2.84408	3.4967	0.0484336		2	histamine	315	2710.3	2.63393	3.2703	0.122253
cytosol	3	3	4	no stim.	2.85048	3.5215	0.0441677		cytosol	2	3	11	no stim.	2.86466	3.23114	0.0705455		1	histamine	412.049	2533.99	2.95132	3.53771	0.0129564		2	ionomycin	319.491	2718.77	2.71186	3.25847	0.104188
cytosol	3	3	11	no stim.	2.89528	3.45509	0.0398588		cytosol	2	3	12	no stim.	2.76938	3.24322	0.0919226		1	histamine	417.771	2505.83	2.89986	3.54821	0.0275937		2	ionomycin	324.261	2660.6	2.35973	2.82999	0.285458
cytosol	3	4	1	no stim.	2.86997	3.50981	0.0404205		cytosol	2	3	13	no stim.	2.76914	3.2562	0.0906619		1	histamine	423.566	2526.11	2.96995	3.51821	0.0129564		2	ionomycin	328.773	2619.34	1.95974	2.49719	1.91084
cytosol	3	4	2	no stim.	2.77107	3.43993	0.0717119		cytosol	2	3	14	no stim.	2.8268	3.25036	0.077595		1	histamine	429.392	2508.8	2.91203	3.34835	0.0471133		2	ionomycin	333.324	2629.09	1.94245	2.53169	1.95102
cytosol	3	4	3	no stim.	2.81728	3.42343	0.0624898		cytosol	2	4	1	no stim.	2.81507	3.23578	0.0818242		1	ionomycin	435.195	2355.92	2.10758	2.64572	0.596881		2	ionomycin	337.912	2627.85	1.9214	2.48714	5.7087
cytosol	3	4	4	no stim.	2.87835	3.48559	0.0409161		cytosol	2	4	2	no stim.	2.80547	3.28687	0.0789847		1	ionomycin	441.101	2361.28	2.03625	2.60885	0.809895		2	ionomycin	342.613	2627.03	1.97021	2.50114	1.65908
cytosol	3	4	5	no stim.	2.86682	3.41396	0.0514986		cytosol	2	4	3	no stim.	2.70607	3.18995	0.11284		1	ionomycin	447.282	2347.75	2.01503	2.58238	0.940393		2	ionomycin	347.107	2621.33	1.95158	2.45739	3.01111
cytosol	3	4	6	no stim.	2.82659	3.38593	0.0640707		cytosol	2	4	4	no stim.	2.79511	3.2687	0.0832493		1	ionomycin	453.083	2342.77	1.97929	2.51134	1.45598		2	ionomycin	351.59	2628.68	1.94252	2.53907	1.86751
cytosol	3	4	7	no stim.	2.86066	3.49328	0.0446321		cytosol	2	4	5	no stim.	2.80358	3.26009	0.0821101		1	ionomycin	458.964	2338.54	1.99618	2.54647	1.14302		2	ionomycin	356.091	2638.85	1.90537	2.46777	14.8081
cytosol	3	4	8	no stim.	2.89024	3.41902	0.0451052		cytosol	2	4	6	no stim.	2.78654	3.26284	0.0858644		1	ionomycin	464.741	2344.4	1.97355	2.62851	1.04655		2	ionomycin	360.603	2632.13	1.94522	2.44967	4.07157
cytosol	3	4	10	no stim.	2.89279	3.50276	0.0351133		cytosol	2	4	7	no stim.	2.76722	3.24137	0.0926244		1	ionomycin	470.539	2354.94	2.00223	2.60087	0.961215		2	ionomycin	365.139	2620.62	1.89959	2.49443	14.8081
cytosol	4	1	1	no stim.	2.87086	3.30057	0.0621195		cytosol	2	4	8	no stim.	2.78772	3.21624	0.0902815		1	ionomycin	476.305	2346.1	2.03423	2.56599	0.888986		2	ionomycin	369.62	2641.24	1.95008	2.40546	14.8081
cytosol	4	1	2	no stim.	2.79734	3.25054	0.084543		cytosol	2	4	9	no stim.	2.79469	3.24175	0.0860541		1	ionomycin	482.095	2345.51	2.01317	2.60169	0.909549		2	ionomycin	374.118	2644.87	1.95007	2.40356	14.8081
cytosol	4	1	4	no stim.	2.69579	3.22028	0.11216		cytosol	2	4	10	no stim.	2.76851	3.22317	0.0941664		1	ionomycin	487.86	2344.71	2.01485	2.6092	0.888221		3	no stim.	0	2641.79	2.73485	3.32364	0.0919562
cytosol	4	1	7	no stim.	2.80725	3.21273	0.0859878		cytosol	2	4	11	no stim.	2.81449	3.24718	0.0808232		3	no stim.	0	2577.27	2.78761	3.3383	0.0780368		3	no stim.	4.502	2632.13	2.70982	3.28585	0.10183
cytosol	4	2	1	no stim.	2.89413	3.30617	0.0559315		cytosol	3	1	1	no stim.	2.89707	3.37207	0.0483737		3	no stim.	5.832	2580.31	2.80326	3.37214	0.0709663		3	no stim.	9.049	2659.34	2.76935	3.30646	0.0855347
cytosol	4	2	2	no stim.	2.68284	3.31073	0.105761		cytosol	3	1	2	no stim.	2.88271	3.34777	0.0544524		3	no stim.	11.678	2570.52	2.80499	3.37216	0.0705586		3	no stim.	13.571	2676.99	2.75392	3.31357	0.0884615
cytosol	4	2	3	no stim.	2.74296	3.37276	0.0850569		cytosol	3	1	3	no stim.	2.88451	3.36685	0.0520408		3	no stim.	17.472	2581.01	2.8387	3.42268	0.0574427		3	no stim.	18.116	2657.36	2.77674	3.36092	0.0783203
cytosol	4	2	4	no stim.	2.80569	3.36942	0.0706699		cytosol	3	1	4	no stim.	2.83781	3.37451	0.0625544		3	no stim.	23.199	2576.45	2.80857	3.41253	0.0656534		3	no stim.	22.586	2647.73	2.80879	3.368	0.070081
cytosol	4	2	5	no stim.	2.70944	3.29418	0.101057		cytosol	3	1	5	no stim.	2.75742	3.31671	0.0873181		3	no stim.	28.98	2577.34	2.84228	3.4028	0.0586129		3	no stim.	27.132	2664.16	2.71581	3.40056	0.0886184
cytosol	4	2	6	no stim.	2.58806	3.29851	0.130872		cytosol	3	1	6	no stim.	2.78985	3.35559	0.0757782		3	no stim.	34.785	2574.89	2.86062	3.4455	0.0497293		3	no stim.	31.658	2672.22	2.73086	3.32819	0.0924363
cytosol	4	2	8	no stim.	2.72874	3.22329	0.103749		cytosol	3	1	7	no stim.	2.86762	3.34991	0.057901		3	no stim.	40.614	2574.42	2.85774	3.38838	0.056358		3	no stim.	36.189	2672.67	2.73701	3.3613	0.0876169
cytosol	4	2	9	no stim.	2.73459	3.25223	0.0993362		cytosol	3	1	8	no stim.	2.80157	3.33871	0.0747146		3	no stim.	46.351	2577.24	2.82499	3.42305	0.060693		3	no stim.	40.646	2670.48	2.75117	3.32295	0.0881622
cytosol	4	2	11	no stim.	2.8766	3.33206	0.0575474		cytosol	3	1	9	no stim.	2.93124	3.28216	0.0492378		3	no stim.	52.12	2576.04	2.84358	3.37478	0.0611505		3	no stim.	45.16	2662.22	2.85524	3.33749	0.0621354
cytosol	4	3	3	no stim.	2.86035	3.31535	0.063145		cytosol	3	1	10	no stim.	2.89172	3.34647	0.0523773		3	no stim.	57.831	2576.09	2.83547	3.39142	0.0614004		3	no stim.	49.654	2651.96	2.7703	3.37452	0.0784668
cytosol	4	3	4	no stim.	2.79368	3.36682	0.0737521		cytosol	3	1	11	no stim.	2.88289	3.33147	0.0560804		3	no stim.	63.754	2578.76	2.85288	3.43424	0.0528121		3	no stim.	54.175	2644.31	2.74763	3.3434	0.0869267
cytosol	4	3	5	no stim.	2.84771	3.25048	0.0726393		cytosol	3	1	12	no stim.	2.85986	3.35737	0.0590119		3	no stim.	69.545	2575.35	2.81249	3.39548	0.0664459		3	no stim.	58.766	2673.35	2.81717	3.31275	0.0736388
cytosol	4	3	7	no stim.	2.71177	3.23901	0.106247		cytosol	3	2	1	no stim.	2.94508	3.37031	0.0360405		3	histamine	75.577	2412.8	2.08147	2.83252	0.50777		3	no stim.	63.332	2666.02	2.75156	3.40382	0.0799073
cytosol	4	3	8	no stim.	2.80916	3.29678	0.077123		cytosol	3	2	2	no stim.	2.95913	3.41105	0.0271057		3	histamine	81.546	2583.45	2.8501	3.42805	0.0541309		3	no stim.	67.804	2671.17	2.73019	3.3408	0.0913114
cytosol	4	3	10	no stim.	2.69214	3.23998	0.110967		cytosol	3	2	3	no stim.	2.89421	3.37761	0.0485062		3	histamine	87.683	2578.41	2.8092	3.32543	0.0742496		3	histamine	72.283	2658.06	2.76623	3.32676	0.0842255
cytosol	4	3	12	no stim.	2.75401	3.34152	0.0856138		cytosol	3	2	4	no stim.	2.83052	3.2829	0.0734712		3	histamine	93.547	2445.68	2.33526	2.98376	0.263958		3	histamine	76.897	2663.08	2.79328	3.30568	0.0799738
cytosol	4	3	14	no stim.	2.77023	3.26899	0.0891092		cytosol	3	2	5	no stim.	2.85256	3.32894	0.0636364		3	histamine	99.48	2548.2	2.57491	3.29614	0.134589		3	histamine	81.467	2677.15	2.65998	3.29457	0.113083
cytosol	4	4	1	no stim.	2.78215	3.33473	0.0796794		cytosol	3	2	6	no stim.	2.87803	3.33233	0.0571745		3	histamine	105.281	2590.52	2.81531	3.38874	0.0664577		3	histamine	85.905	2684.35	2.66064	3.26867	0.11571
cytosol	4	4	2	no stim.	2.74856	3.23661	0.0975817		cytosol	3	2	7	no stim.	2.83643	3.34997	0.0653565		3	histamine	111.136	2585.54	2.84563	3.49253	0.0484901		3	histamine	90.469	2696.01	2.70895	3.40499	0.0897814
cytosol	4	4	3	no stim.	2.85972	3.35508	0.0592784		cytosol	3	2	8	no stim.	2.83674	3.33637	0.0666507		3	histamine	116.926	2554.87	2.78234	3.31827	0.0812872		3	histamine	95.108	2683.52	2.71827	3.29343	0.0990105
cytosol	4	4	4	no stim.	2.77828	3.28906	0.0851786		cytosol	3	2	9	no stim.	2.85054	3.3382	0.0631856		3	histamine	122.702	2452.37	2.28295	2.91539	0.306524		3	histamine	99.523	2673.69	2.68291	3.28886	0.108052
cytosol	4	4	5	no stim.	2.83752	3.26335	0.0737669		cytosol	3	2	10	no stim.	2.85996	3.36983	0.0577182		3	histamine	128.429	2597.53	2.77698	3.35299	0.0790604		3	histamine	104.055	2685.96	2.67009	3.28	0.112145
cytosol	4	5	1	no stim.	2.75142	3.33015	0.0873751		cytosol	3	2	11	no stim.	2.86871	3.36529	0.0560658		3	histamine	134.13	2601.88	2.84806	3.46725	0.050552		3	histamine	108.55	2670.15	2.71207	3.27882	0.102016
cytosol	4	5	3	no stim.	2.79043	3.3411	0.0770952		cytosol	3	2	12	no stim.	2.90295	3.35893	0.0482829		3	histamine	139.865	2599.28	2.90257	3.4691	0.0363283		3	histamine	113.023	2674.28	2.72736	3.38209	0.087778
cytosol	4	5	4	no stim.	2.75197	3.3072	0.0895697		cytosol	3	2	13	no stim.	2.89107	3.35545	0.0516042		3	histamine	145.588	2608.05	2.86884	3.40555	0.0518767		3	histamine	117.493	2674.66	2.7052	3.35969	0.0953035
cytosol	4	5	7	no stim.	2.76366	3.37498	0.0799765		cytosol	3	2	14	no stim.	2.81899	3.33674	0.0708106		3	histamine	151.459	2599.23	2.85135	3.41675	0.0549937		3	histamine	121.904	2654.15	2.77048	3.29072	0.0868559
cytosol	4	5	8	no stim.	2.72133	3.31927	0.0956176		cytosol	3	2	15	no stim.	2.85974	3.31716	0.0631084		3	histamine	157.201	2598.28	2.8538	3.45474	0.0504483		3	histamine	126.37	2676.95	2.72063	3.34866	0.0927722
cytosol	4	5	9	no stim.	2.84639	3.33229	0.0647696		cytosol	3	2	16	no stim.	2.9875	3.2629	0.0366314		3	histamine	163.001	2582.77	2.85392	3.36494	0.0596716		3	histamine	130.817	2662.81	2.70136	3.36424	0.0957486
cytosol	1	5	1	ionomycin	1.95321	2.50013	2.04861		cytosol	3	2	17	no stim.	2.83748	3.3344	0.0666733		3	histamine	168.803	2470.18	2.36305	3.01625	0.245099		3	histamine	135.331	2656.64	2.65946	3.30879	0.111686
cytosol	1	5	2	ionomycin	2.10187	2.89285	0.45202		cytosol	3	2	18	no stim.	2.83514	3.27568	0.073099		3	histamine	174.643	2594.67	2.71673	3.35482	0.0930676		3	histamine	139.831	2685.33	2.68498	3.33328	0.10288
cytosol	1	5	3	ionomycin	2.07086	2.63147	0.684733		cytosol	3	2	19	no stim.	2.88473	3.36621	0.0520528		3	histamine	180.406	2613.88	2.91722	3.50012	0.0284748		3	histamine	144.283	2694.71	2.70766	3.27264	0.103727
cytosol	1	5	4	ionomycin	1.98098	2.46479	1.76327		cytosol	3	3	1	no stim.	2.86574	3.305	0.062898		3	histamine	186.222	2619.73	2.87112	3.42992	0.04876		3	histamine	148.794	2676.46	2.68667	3.28991	0.107022
cytosol	1	5	5	ionomycin	1.99589	2.51111	1.27639		cytosol	3	3	2	no stim.	2.842	3.28669	0.0703782		3	histamine	191.984	2604.04	2.88048	3.42823	0.0465908		3	histamine	153.288	2693.71	2.70322	3.2599	0.106142
cytosol	1	5	6	ionomycin	2.00345	2.58187	0.99892		cytosol	3	3	3	no stim.	2.84372	3.30019	0.0686224		3	histamine	197.733	2613.08	2.87782	3.50184	0.0392486		3	histamine	157.748	2674.6	2.73954	3.29649	0.0936088
cytosol	1	5	7	ionomycin	2.02172	2.54939	0.980316		cytosol	3	3	4	no stim.	2.82738	3.30788	0.071718		3	histamine	203.542	2614.09	2.8061	3.42793	0.064683		3	histamine	162.299	2673.87	2.69738	3.31529	0.101767
cytosol	2	7	1	ionomycin	1.96213	2.48636	1.97441		cytosol	3	3	5	no stim.	2.8485	3.28096	0.0694103		3	histamine	209.364	2613.08	2.88903	3.45391	0.0416257		3	histamine	166.712	2672.56	2.73735	3.33919	0.0897813
cytosol	2	7	2	ionomycin	1.99181	2.46356	1.58158		cytosol	3	3	6	no stim.	2.85587	3.28654	0.0671054		3	histamine	215.226	2604.53	2.87788	3.50539	0.0388342		3	histamine	171.194	2682.77	2.66064	3.34998	0.107017
cytosol	2	7	5	ionomycin	1.99849	2.49533	1.31996		cytosol	3	3	7	no stim.	2.84336	3.31834	0.0668887		3	histamine	221.04	2607.27	2.89794	3.45118	0.0395914		3	histamine	175.686	2672.21	2.65234	3.24075	0.120839
cytosol	2	7	6	ionomycin	1.95078	2.49397	2.21438		cytosol	3	3	8	no stim.	2.82912	3.29765	0.0723282		3	histamine	226.837	2603.26	2.88819	3.42044	0.0454721		3	histamine	180.181	2669.05	2.75271	3.29462	0.0906711
cytosol	3	6	1	ionomycin	1.99388	2.48994	1.39587		cytosol	3	3	10	no stim.	2.8235	3.29562	0.0738579		3	histamine	232.632	2610.1	2.8891	3.49617	0.0368769		3	histamine	184.701	2668.49	2.66344	3.35841	0.105446
cytosol	3	6	2	ionomycin	1.95818	2.55091	1.49714		cytosol	3	3	11	no stim.	2.83627	3.29488	0.0709168		3	histamine	238.468	2611.98	2.90489	3.44547	0.038385		3	histamine	189.196	2663.85	2.7325	3.35355	0.089467
cytosol	3	6	3	ionomycin	2.0318	2.61199	0.82014		cytosol	3	3	12	no stim.	2.83863	3.30451	0.069395		3	histamine	244.22	2603.27	2.87655	3.46116	0.044054		3	histamine	193.64	2665.66	2.78577	3.34965	0.0773317
cytosol	3	6	4	ionomycin	1.95536	2.5857	1.34157		cytosol	3	3	15	no stim.	2.90197	3.31055	0.0535611		3	histamine	249.97	2481.37	2.48709	3.09473	0.186061		3	histamine	198.171	2668.22	2.78652	3.3413	0.0779943
cytosol	3	6	5	ionomycin	1.95429	2.4868	2.20532		cytosol	3	3	16	no stim.	2.84075	3.32679	0.0666605		3	histamine	255.801	2590.05	2.71482	3.41139	0.0877489		3	histamine	202.618	2675.85	2.76584	3.45385	0.0715352
cytosol	3	6	6	ionomycin	1.95872	2.54249	1.54352		cytosol	3	3	18	no stim.	2.80725	3.27771	0.0794815		3	histamine	261.642	2604.46	2.84747	3.48253	0.0490903		3	histamine	207.111	2687.34	2.80157	3.37683	0.0708941
cytosol	3	6	7	ionomycin	1.96913	2.5404	1.41886		cytosol	1	5t	1	ionomycin	1.96764	2.42012	3.0591		3	histamine	267.437	2602.79	2.90664	3.49946	0.0316321		3	histamine	211.628	2689.8	2.75853	3.41847	0.0768022
cytosol	3	6	8	ionomycin	1.96597	2.49025	1.83881		cytosol	1	5t	3	ionomycin	2.15597	2.63422	0.528562		3	histamine	273.096	2595.72	2.88163	3.4603	0.0428441		3	histamine	216.194	2674.21	2.71209	3.43231	0.0862639
cytosol	4	6	1	ionomycin	2.01485	2.6092	0.888221		cytosol	1	5t	4	ionomycin	2.17756	2.72072	0.454959		3	histamine	279.013	2589.88	2.88108	3.47709	0.0411449		3	histamine	220.696	2673.7	2.73083	3.34866	0.0903581
cytosol	4	6	3	ionomycin	2.01503	2.54061	1.03824		cytosol	1	5t	5	ionomycin	2.05402	2.51672	0.898442		3	histamine	284.797	2592.37	2.89662	3.47412	0.0373621		3	histamine	225.119	2674.82	2.75367	3.34187	0.0856581
cytosol	4	6	4	ionomycin	2.00133	2.61721	0.930486		cytosol	1	5t	6	ionomycin	2.06407	2.48018	0.925214		3	histamine	290.629	2597.78	2.91141	3.49547	0.0307482		3	histamine	229.612	2688.09	2.74518	3.40142	0.0816434
cytosol	4	6	8	ionomycin	1.95012	2.41842	6.74026		cytosol	1	5t	7	ionomycin	2.13047	2.66746	0.54396		3	histamine	296.39	2598.98	2.83334	3.45518	0.0554		3	histamine	234.093	2691.63	2.71555	3.30272	0.0987038
cytosol	4	6	9	ionomycin	2.03357	2.51377	1.00194		cytosol	1	5t	8	ionomycin	2.11086	2.61692	0.614493		3	histamine	302.133	2590.78	2.86594	3.45228	0.0476888		3	histamine	238.667	2656.29	2.78983	3.38061	0.0732735
ER	1	1	1	no stim.	1.80543	2.6377	14.8081		cytosol	1	5t	9	ionomycin	1.89035	2.42841	14.8081		3	histamine	307.875	2591.26	2.86512	3.49877	0.0428952		3	histamine	243.225	2665.08	2.80319	3.34826	0.0733763
ER	1	1	3	no stim.	1.83078	2.63649	14.8081		cytosol	2	6	2	ionomycin	1.93741	2.44316	7.82671		3	histamine	313.685	2591.04	2.85914	3.46266	0.0482877		3	histamine	247.708	2675.46	2.81281	3.31839	0.0741039
ER	1	1	4	no stim.	1.84148	2.71357	2.4853		cytosol	2	6	3	ionomycin	1.97719	2.48738	1.64561		3	histamine	319.452	2585.54	2.85313	3.46988	0.0490199		3	histamine	252.199	2643.71	2.79227	3.46258	0.0644472
ER	1	1	5	no stim.	1.74679	2.57769	14.8081		cytosol	2	6	4	ionomycin	2.04318	2.54106	0.898315		3	histamine	325.255	2571.56	2.82978	3.32094	0.069843		3	histamine	256.669	2655.06	2.7464	3.31926	0.0896635
ER	1	2	2	no stim.	1.65933	2.58281	14.8081		cytosol	2	6	5	ionomycin	1.89656	2.41349	14.8081		3	histamine	331.086	2491.67	2.32689	3.06416	0.251413		3	histamine	261.196	2653.54	2.78428	3.45578	0.0670164
ER	1	2	3	no stim.	1.66675	2.70944	14.8081		cytosol	2	6	7	ionomycin	2.11976	2.71437	0.528944		3	histamine	336.878	2623.82	2.81011	3.50318	0.0560568		3	histamine	265.662	2651.58	2.78117	3.37437	0.0759311
ER	1	3	1	no stim.	1.86223	2.58005	14.8081		cytosol	2	6	8	ionomycin	1.9475	2.49972	2.23798		3	histamine	342.659	2594.46	2.86955	3.54512	0.0365498		3	histamine	270.142	2663.81	2.7834	3.29481	0.0833923
ER	1	3	2	no stim.	1.89381	2.66477	1.67432		cytosol	2	6	9	ionomycin	2.22959	2.88264	0.348845		3	histamine	348.357	2589.9	2.91855	3.50033	0.0280513		3	histamine	274.671	2646.33	2.77796	3.40387	0.0737241
ER	1	3	3	no stim.	1.78226	2.52394	14.8081		cytosol	2	6	11	ionomycin	1.938	2.39291	14.8081		3	histamine	354.08	2593.55	2.9312	3.49093	0.0254021		3	histamine	279.174	2654.54	2.7728	3.4958	0.0656709
ER	1	3	4	no stim.	1.77215	2.59092	14.8081		cytosol	2	6	12	ionomycin	1.94416	2.49201	2.52076		3	histamine	359.797	2592.44	2.8951	3.5211	0.0323113		3	histamine	283.605	2651.2	2.75993	3.38674	0.0796672
ER	1	3	5	no stim.	1.7448	2.56166	14.8081		cytosol	2	6	13	ionomycin	1.98797	2.55181	1.18665		3	histamine	365.649	2592.01	2.91104	3.46003	0.035055		3	histamine	288.118	2652.28	2.74639	3.45635	0.075826
ER	1	3	6	no stim.	1.87163	2.63774	2.79662		cytosol	2	6	14	ionomycin	1.95925	2.4426	2.93671		3	histamine	371.448	2589.68	2.90091	3.51612	0.0312589		3	histamine	292.58	2657.81	2.72772	3.4811	0.0776824
ER	1	6	1	no stim.	1.77865	2.51898	14.8081		cytosol	3	5	1	ionomycin	2.05803	2.59389	0.762841		3	histamine	377.197	2591.66	2.85388	3.43569	0.0524156		3	histamine	297.046	2663.38	2.80402	3.48282	0.0596044
ER	1	6	2	no stim.	1.84638	2.6103	14.8081		cytosol	3	5	2	ionomycin	2.00554	2.50602	1.21159		3	histamine	383.079	2578.42	2.89246	3.46643	0.0393391		3	histamine	301.513	2664.48	2.79771	3.42183	0.0672778
ER	1	6	3	no stim.	1.76766	2.61833	14.8081		cytosol	3	5	3	ionomycin	1.96261	2.47165	2.155		3	histamine	388.861	2586.63	2.85825	3.47588	0.0471067		3	histamine	305.995	2666.89	2.78857	3.39532	0.0720921
ER	1	6	4	no stim.	1.75581	2.58117	14.8081		cytosol	3	5	4	ionomycin	1.92779	2.47089	6.10617		3	histamine	394.643	2580.47	2.93054	3.51161	0.0228413		3	histamine	310.441	2655.22	2.80662	3.31564	0.0758355
ER	1	6	5	no stim.	1.82562	2.67346	14.8081		cytosol	3	5	5	ionomycin	1.94565	2.43184	5.99793		3	histamine	400.447	2575.82	2.91399	3.49996	0.0294463		3	histamine	315	2666.77	2.85339	3.37976	0.0582906
ER	1	6	6	no stim.	1.8467	2.58641	14.8081		cytosol	3	5	6	ionomycin	2.09762	2.63542	0.62394		3	histamine	406.226	2580.01	2.85575	3.54641	0.0400697		3	ionomycin	319.491	2656.82	2.89586	3.42223	0.0433169
ER	2	1	1	no stim.	1.87988	2.7202	1.488		cytosol	3	5	7	ionomycin	1.88479	2.32231	14.8081		3	histamine	412.049	2589.82	2.89625	3.45624	0.0394723		3	ionomycin	324.261	2611	2.57268	2.94467	0.179467
ER	2	1	2	no stim.	1.77745	2.77043	14.8081		cytosol	3	5	8	ionomycin	1.90291	2.36317	14.8081		3	histamine	417.771	2576.9	2.90207	3.49007	0.0340325		3	ionomycin	328.773	2526.45	1.94567	2.62266	1.26982
ER	2	1	3	no stim.	1.77967	2.5205	14.8081		cytosol	3	5	10	ionomycin	2.08408	2.61912	0.66727		3	histamine	423.566	2572.4	2.92117	3.49732	0.0276462		3	ionomycin	333.324	2522.15	1.90806	2.48516	14.8081
ER	2	1	4	no stim.	1.83582	2.64719	14.8081		cytosol	3	5	11	ionomycin	1.98992	2.47716	1.51953		3	histamine	429.392	2596.8	2.94494	3.53855	0.0135268		3	ionomycin	337.912	2530.35	1.8947	2.46859	14.8081
ER	2	1	5	no stim.	1.91481	2.72293	1.14089		cytosol	3	5	12	ionomycin	2.07215	2.64305	0.669804		3	ionomycin	435.195	2401.59	2.075	2.62549	0.681397		3	ionomycin	342.613	2536.89	1.86402	2.46029	14.8081
ER	2	1	6	no stim.	1.90501	2.67353	1.44943		cytosol	3	5	15	ionomycin	2.05722	2.56142	0.811267		3	ionomycin	441.101	2395.44	1.95205	2.57326	1.44406		3	ionomycin	347.107	2556.73	1.88098	2.48947	14.8081
ER	2	1	8	no stim.	1.93154	2.73648	1.00036		cytosol	3	5	16	ionomycin	1.97374	2.46104	1.96856		3	ionomycin	447.282	2395.13	1.93544	2.57026	1.71766		3	ionomycin	351.59	2566.43	1.91157	2.56398	2.50347
ER	2	2	1	no stim.	1.83349	2.6207	14.8081		cytosol	3	5	17	ionomycin	2.08253	2.6261	0.663754		3	ionomycin	453.083	2389.26	1.9877	2.54511	1.21337		3	ionomycin	356.091	2567.81	1.87854	2.478	14.8081
ER	2	2	2	no stim.	1.88499	2.69011	1.62141		cytosol	3	5	18	ionomycin	1.98429	2.52745	1.31731		3	ionomycin	458.964	2393.18	1.95675	2.47445	2.31979		3	ionomycin	360.603	2565.88	1.84391	2.45927	14.8081
ER	2	2	3	no stim.	1.90122	2.6345	1.80449		ER	1	1	1	no stim.	1.69602	2.10899	14.8081		3	ionomycin	464.741	2398.04	1.98281	2.56851	1.16791		3	ionomycin	365.139	2594.58	1.89326	2.46371	14.8081
ER	2	2	4	no stim.	1.82768	2.58323	14.8081		ER	1	1	2	no stim.	1.71437	2.02227	14.8081		3	ionomycin	470.539	2392.26	1.95935	2.67829	0.997557		3	ionomycin	369.62	2627.08	1.88106	2.51632	14.8081
ER	2	2	5	no stim.	1.8972	2.72246	1.28526		ER	1	1	3	no stim.	1.70579	2.05772	14.8081		3	ionomycin	476.305	2386.85	1.96418	2.55279	1.41067		3	ionomycin	374.118	2631.92	1.84211	2.49973	14.8081
ER	2	3	1	no stim.	1.8375	2.58032	14.8081		ER	1	1	4	no stim.	1.71035	1.92775	14.8081		3	ionomycin	482.095	2388.26	2.02555	2.54605	0.968646		5	no stim.	0	2700.24	2.6194	3.17829	0.136449
ER	2	3	2	no stim.	1.85473	2.63118	5.63719		ER	1	1	5	no stim.	1.77817	2.04776	14.8081		3	ionomycin	487.86	2391.84	2.01503	2.54061	1.03824		5	no stim.	4.502	2672.12	2.58225	3.18087	0.146241
ER	2	3	5	no stim.	1.82017	2.65312	14.8081		ER	1	1	6	no stim.	1.70126	1.73527	14.8081		4	no stim.	0	2857.71	2.77329	3.42246	0.0729501		5	no stim.	9.049	2691.54	2.59698	3.15613	0.145148
ER	2	3	6	no stim.	1.76364	2.71473	14.8081		ER	1	1	7	no stim.	1.61715	1.39367	14.8081		4	no stim.	5.832	2859.69	2.83152	3.30131	0.0713954		5	no stim.	13.571	2702.53	2.61055	3.15973	0.141005
ER	2	4	2	no stim.	1.77594	2.52832	14.8081		ER	1	1	8	no stim.	1.80651	1.91567	14.8081		4	no stim.	11.678	2869.85	2.85228	3.37709	0.0588284		5	no stim.	18.116	2696.86	2.59432	3.19807	0.140883
ER	2	4	3	no stim.	1.86554	2.66043	2.54565		ER	1	1	9	no stim.	1.7055	2.01542	14.8081		4	no stim.	17.472	2887.42	2.78654	3.41615	0.0704767		5	no stim.	22.586	2695.67	2.64841	3.16712	0.130051
ER	2	4	4	no stim.	1.82499	2.61619	14.8081		ER	1	1	10	no stim.	1.64282	1.72952	14.8081		4	no stim.	23.199	2885.8	2.84451	3.40612	0.0577387		5	no stim.	27.132	2685.7	2.60888	3.23171	0.133074
ER	2	4	5	no stim.	1.77456	2.60385	14.8081		ER	1	1	11	no stim.	1.74903	1.88853	14.8081		4	no stim.	28.98	2890.19	2.83324	3.40539	0.060516		5	no stim.	31.658	2700.26	2.61945	3.21231	0.132517
ER	3	1	1	no stim.	1.83544	2.4996	14.8081		ER	1	1	12	no stim.	1.80575	2.03278	14.8081		4	no stim.	34.785	2893.33	2.82784	3.39741	0.0626138		5	no stim.	36.189	2711.7	2.57583	3.17169	0.149143
ER	3	1	2	no stim.	1.70296	2.51657	14.8081		ER	1	1	13	no stim.	1.81668	1.89792	14.8081		4	no stim.	40.614	2897.93	2.80871	3.43659	0.0631902		5	no stim.	40.646	2713.39	2.61166	3.14538	0.142399
ER	3	1	3	no stim.	1.74395	2.72449	14.8081		ER	1	1	14	no stim.	1.90714	2.18716	14.8081		4	no stim.	46.351	2901.36	2.83545	3.41048	0.0594696		5	no stim.	45.16	2703.63	2.59557	3.22402	0.137496
ER	3	1	6	no stim.	1.79429	2.85059	1.86866		ER	1	1	15	no stim.	1.79875	2.06635	14.8081		4	no stim.	52.12	2909.35	2.82727	3.42854	0.0595878		5	no stim.	49.654	2709.42	2.60031	3.2007	0.138956
ER	3	1	7	no stim.	1.6131	2.44398	14.8081		ER	1	1	16	no stim.	1.67998	1.77704	14.8081		4	no stim.	57.831	2917.41	2.83838	3.4224	0.0575485		5	no stim.	54.175	2744.6	2.62752	3.19572	0.132288
ER	3	1	8	no stim.	1.9035	2.63334	1.76899		ER	1	1	17	no stim.	1.72144	1.77429	14.8081		4	no stim.	63.754	2917.01	2.88616	3.42331	0.0456816		5	no stim.	58.766	2751.03	2.61363	3.16651	0.139373
ER	3	1	9	no stim.	1.80112	2.57307	14.8081		ER	1	1	18	no stim.	1.6205	1.81124	14.8081		4	no stim.	69.545	2940.14	2.90526	3.41443	0.0417333		5	no stim.	63.332	2731.3	2.60611	3.19283	0.138316
ER	3	1	10	no stim.	1.77733	2.55694	14.8081		ER	1	1	19	no stim.	1.67876	2.00006	14.8081		4	histamine	75.577	2730.31	2.05821	2.87983	0.509383		5	no stim.	67.804	2744.7	2.62857	3.19497	0.132097
ER	3	1	11	no stim.	1.82369	2.51945	14.8081		ER	1	2	1	no stim.	1.69703	1.98084	14.8081		4	histamine	81.546	2944.43	2.75781	3.3581	0.0830472		5	histamine	72.283	2738.02	2.6604	3.22434	0.120596
ER	3	2	1	no stim.	1.81531	2.56332	14.8081		ER	1	2	2	no stim.	1.70514	1.97717	14.8081		4	histamine	87.683	2954.52	2.8588	3.42829	0.05198		5	histamine	76.897	2789.65	2.37985	2.76579	0.289611
ER	3	2	2	no stim.	1.814	2.56314	14.8081		ER	1	2	3	no stim.	1.73236	2.13339	14.8081		4	histamine	93.547	2826.34	2.51386	3.05856	0.182527		5	histamine	81.467	2570.04	2.49807	3.23235	0.163794
ER	3	2	4	no stim.	1.78774	2.4795	14.8081		ER	1	2	4	no stim.	1.83212	2.15955	14.8081		4	histamine	99.48	2952.78	2.63362	3.25725	0.123779		5	histamine	85.905	2557.34	2.57602	3.23545	0.141413
ER	3	2	5	no stim.	1.76966	2.51231	14.8081		ER	1	2	5	no stim.	1.87742	2.18018	14.8081		4	histamine	105.281	3001.53	2.89475	3.46838	0.0385113		5	histamine	90.469	2581.06	2.60768	3.20529	0.136444
ER	3	2	6	no stim.	1.80921	2.50151	14.8081		ER	1	2	6	no stim.	1.78996	1.863	14.8081		4	histamine	111.136	3002.78	2.87189	3.4905	0.0420535		5	histamine	95.108	2571.02	2.57668	3.27882	0.136134
ER	3	2	7	no stim.	1.75288	2.43139	14.8081		ER	1	2	7	no stim.	1.74902	1.80972	14.8081		4	histamine	116.926	3008.94	2.92169	3.43264	0.0352959		5	histamine	99.523	2556.67	2.66568	3.22488	0.119199
ER	3	2	8	no stim.	1.87215	2.509	14.8081		ER	1	2	8	no stim.	1.68465	1.74207	14.8081		4	histamine	122.702	2869.17	2.50157	3.13945	0.175173		5	histamine	104.055	2564.64	2.59092	3.24144	0.136707
ER	3	2	9	no stim.	1.79106	2.50866	14.8081		ER	1	2	9	no stim.	1.76617	1.99975	14.8081		4	histamine	128.429	3008.13	2.73843	3.46815	0.0764941		5	histamine	108.55	2577.25	2.67861	3.26266	0.111893
ER	3	2	10	no stim.	1.58501	2.53933	14.8081		ER	1	2	10	no stim.	1.71904	1.98377	14.8081		4	histamine	134.13	3057.33	2.90987	3.43112	0.0386674		5	histamine	113.023	2574.03	2.59671	3.19908	0.140118
ER	3	2	11	no stim.	1.70128	2.53848	14.8081		ER	1	2	11	no stim.	1.72769	2.01509	14.8081		4	histamine	139.865	3057.42	2.89871	3.47708	0.0364587		5	histamine	117.493	2574.12	2.61736	3.2047	0.133942
ER	3	2	12	no stim.	1.58101	2.5483	14.8081		ER	1	2	12	no stim.	1.70038	2.05276	14.8081		4	histamine	145.588	3046.32	2.89162	3.44936	0.041451		5	histamine	121.904	2577.21	2.65751	3.26767	0.1166
ER	1	7	1	ionomycin	1.80693	2.68904	14.8081		ER	1	2	13	no stim.	1.79123	2.13298	14.8081		4	histamine	151.459	2897.77	2.51593	3.15427	0.168771		5	histamine	126.37	2583.28	2.6686	3.28672	0.111793
ER	1	7	2	ionomycin	1.88181	2.69954	1.60103		ER	1	2	14	no stim.	1.67579	1.79755	14.8081		4	histamine	157.201	3054.57	2.80172	3.40458	0.0680723		5	histamine	130.817	2580.62	2.68917	3.2541	0.110199
ER	1	7	3	ionomycin	1.81926	2.68565	14.8081		ER	1	2	15	no stim.	1.69296	1.77049	14.8081		4	histamine	163.001	3053.37	2.86116	3.43069	0.0511488		5	histamine	135.331	2569.55	2.66816	3.25294	0.115533
ER	1	7	5	ionomycin	1.89131	2.70777	1.41949		ER	2	2	1	no stim.	1.7763	2.21336	14.8081		4	histamine	168.803	3055.99	2.85953	3.47881	0.0464719		5	histamine	139.831	2574.56	2.68849	3.30623	0.104864
ER	1	7	6	ionomycin	1.86588	2.63126	3.50458		ER	2	2	2	no stim.	1.79917	2.09496	14.8081		4	histamine	174.643	3049.73	2.86021	3.46391	0.0478887		5	histamine	144.283	2572.15	2.69167	3.27942	0.106908
ER	2	5	2	ionomycin	1.85274	2.68173	2.68297		ER	2	2	3	no stim.	1.70774	1.97827	14.8081		4	histamine	180.406	3073.78	2.88651	3.47845	0.0395686		5	histamine	148.794	2576.2	2.65548	3.37127	0.106018
ER	2	5	3	ionomycin	1.89067	2.67163	1.67267		ER	2	2	4	no stim.	1.71882	1.58666	14.8081		4	histamine	186.222	3060.87	2.89198	3.44729	0.0415849		5	histamine	153.288	2579.51	2.70876	3.16041	0.115324
ER	2	5	4	ionomycin	1.8339	2.69644	3.61097		ER	2	2	5	no stim.	1.68767	1.65834	14.8081		4	histamine	191.984	3024.42	2.76146	3.31467	0.0865711		5	histamine	157.748	2580.38	2.68352	3.28256	0.10857
ER	3	3	1	ionomycin	1.75536	2.48465	14.8081		ER	2	2	6	no stim.	1.93336	2.01719	14.8081		4	histamine	197.733	3013.91	2.70956	3.34428	0.0958512		5	histamine	162.299	2580.48	2.73605	3.28465	0.0956532
ER	3	3	2	ionomycin	1.6712	2.44699	14.8081		ER	2	2	7	no stim.	1.7883	2.06395	14.8081		4	histamine	203.542	3073.42	2.8622	3.47319	0.0463997		5	histamine	166.712	2566.2	2.70645	3.29621	0.101566
ER	3	3	4	ionomycin	1.91555	2.59265	1.92202		ER	2	2	9	no stim.	1.91747	2.0449	14.8081		4	histamine	209.364	3085.53	2.91659	3.43467	0.0364564		5	histamine	171.194	2584.43	2.68085	3.265	0.111089
ER	3	3	5	ionomycin	1.93382	2.53306	2.1856		ER	2	2	10	no stim.	1.6498	1.99278	14.8081		4	histamine	215.226	3088.66	2.8874	3.51641	0.0350074		5	histamine	175.686	2566.73	2.75895	3.2886	0.0898011
ER	3	3	6	ionomycin	1.97384	2.68207	0.919887		ER	2	2	11	no stim.	1.7619	2.03356	14.8081		4	histamine	221.04	3082.64	2.90148	3.46585	0.0369925		5	histamine	180.181	2565.98	2.69603	3.26297	0.107576
ER	3	3	7	ionomycin	1.86889	2.49613	14.8081		ER	2	2	12	no stim.	1.82601	2.06797	14.8081		4	histamine	226.837	3084.7	2.91055	3.49592	0.0309412		5	histamine	184.701	2562.06	2.70744	3.37069	0.0936433
ER	3	3	8	ionomycin	1.95701	2.59385	1.28797		ER	2	2	13	no stim.	1.7816	1.95418	14.8081		4	histamine	232.632	3084.29	2.93209	3.48654	0.0256984		5	histamine	189.196	2567.42	2.67594	3.27347	0.111399
ER	3	3	9	ionomycin	1.88849	2.49324	14.8081		ER	2	2	14	no stim.	1.8106	2.1227	14.8081		4	histamine	238.468	3088.64	2.90234	3.51137	0.0314241		5	histamine	193.64	2562.29	2.72833	3.24535	0.101559
mitochondria	1	1	1	no stim.	2.7766	3.34777	0.0796744		ER	2	3	1	no stim.	1.7295	2.11753	14.8081		4	histamine	244.22	3095.89	2.86964	3.49165	0.0425106		5	histamine	198.171	2561.48	2.69808	3.29347	0.103874
mitochondria	1	1	2	no stim.	2.76143	3.40607	0.0773722		ER	2	3	2	no stim.	1.77308	2.05359	14.8081		4	histamine	249.97	3091.3	2.89819	3.48746	0.0354073		5	histamine	202.618	2569.28	2.62888	3.31436	0.118678
mitochondria	1	1	3	no stim.	2.72853	3.32449	0.0933685		ER	2	3	3	no stim.	1.84441	1.97124	14.8081		4	histamine	255.801	3090.14	2.9089	3.51103	0.0295702		5	histamine	207.111	2568.77	2.76872	3.37174	0.0791153
mitochondria	1	2	1	no stim.	2.7054	3.32218	0.0991238		ER	2	3	4	no stim.	1.92275	1.97418	14.8081		4	histamine	261.642	3100.57	2.91341	3.48922	0.030929		5	histamine	211.628	2565.28	2.69634	3.28797	0.104872
mitochondria	1	2	2	no stim.	2.54927	3.14061	0.160632		ER	2	3	5	no stim.	1.91358	2.15431	14.8081		4	histamine	267.437	3097.64	2.92397	3.4667	0.0306209		5	histamine	216.194	2573	2.67357	3.34384	0.10453
mitochondria	1	2	3	no stim.	2.73819	3.29268	0.0943199		ER	2	3	6	no stim.	1.82226	2.07045	14.8081		4	histamine	273.096	3091.07	2.90676	3.54727	0.0256124		5	histamine	220.696	2578.31	2.70347	3.348	0.0969196
mitochondria	1	2	4	no stim.	2.77153	3.29914	0.0857595		ER	2	3	7	no stim.	1.71361	2.14662	14.8081		4	histamine	279.013	3098.65	2.93247	3.50908	0.022559		5	histamine	225.119	2592.16	2.70662	3.34859	0.0961081
mitochondria	1	2	5	no stim.	2.73225	3.33546	0.0913671		ER	2	3	8	no stim.	1.71452	2.04897	14.8081		4	histamine	284.797	3084.5	2.90266	3.49854	0.0328701		5	histamine	229.612	2589.11	2.67104	3.27296	0.112663
mitochondria	1	2	6	no stim.	2.75925	3.43698	0.0747729		ER	2	3	9	no stim.	1.74092	2.08884	14.8081		4	histamine	290.629	3095.5	2.89593	3.53753	0.0300844		5	histamine	234.093	2587.86	2.67844	3.36126	0.101532
mitochondria	1	2	7	no stim.	2.33968	2.89239	0.281618		ER	2	3	10	no stim.	1.76639	1.99294	14.8081		4	histamine	296.39	3076.35	2.90049	3.51717	0.0312536		5	histamine	238.667	2591.89	2.69254	3.3836	0.0958519
mitochondria	1	3	1	no stim.	2.6858	3.39439	0.0963398		ER	2	3	11	no stim.	1.67254	2.08331	14.8081		4	histamine	302.133	3082.76	2.91549	3.47288	0.0323026		5	histamine	243.225	2578.34	2.71745	3.27288	0.101335
mitochondria	1	3	2	no stim.	2.7604	3.41843	0.0763704		ER	2	3	12	no stim.	1.74036	2.17732	14.8081		4	histamine	307.875	3080.59	2.93494	3.47598	0.0261878		5	histamine	247.708	2572.65	2.72152	3.32507	0.0949758
mitochondria	1	3	3	no stim.	2.64108	3.39357	0.107145		ER	2	3	13	no stim.	1.65816	2.01354	14.8081		4	histamine	313.685	3081.16	2.90575	3.47895	0.0343155		5	histamine	252.199	2568.23	2.72014	3.35122	0.0926274
mitochondria	1	3	4	no stim.	2.6894	3.31582	0.103637		ER	2	3	14	no stim.	1.74987	2.01741	14.8081		4	histamine	319.452	3082.4	2.92521	3.51729	0.0237902		5	histamine	256.669	2582.41	2.71193	3.33738	0.0959954
mitochondria	1	3	5	no stim.	2.72802	3.33974	0.0919311		ER	2	3	15	no stim.	1.70061	2.03971	14.8081		4	histamine	325.255	3065.23	2.88766	3.50173	0.0366309		5	histamine	261.196	2586.61	2.7406	3.33851	0.089081
mitochondria	1	3	7	no stim.	2.76279	3.37931	0.0797451		ER	2	3	16	no stim.	1.73811	2.01576	14.8081		4	histamine	331.086	3078.13	2.80025	3.44597	0.0642418		5	histamine	265.662	2588.12	2.70607	3.22434	0.10919
mitochondria	1	4	1	no stim.	2.7782	3.33136	0.0809464		ER	2	3	17	no stim.	1.74593	2.05073	14.8081		4	histamine	336.878	3086.59	2.78208	3.33199	0.0799697		5	histamine	270.142	2578.58	2.72521	3.27908	0.0988225
mitochondria	1	4	2	no stim.	2.71454	3.34665	0.0944239		ER	2	3	18	no stim.	1.74359	2.04378	14.8081		4	histamine	342.659	3061.19	2.76531	3.43953	0.0730995		5	histamine	274.671	2583.81	2.74849	3.2807	0.0930896
mitochondria	1	4	3	no stim.	2.69571	3.40162	0.0932466		ER	2	3	19	no stim.	1.66845	1.74628	14.8081		4	histamine	348.357	3080.78	2.896	3.52635	0.0314246		5	histamine	279.174	2581.13	2.72266	3.30277	0.0969955
mitochondria	1	5	1	no stim.	2.71811	3.35452	0.0927713		ER	2	3	20	no stim.	1.71641	1.88471	14.8081		4	histamine	354.08	3074.2	2.93535	3.51261	0.0211103		5	histamine	283.605	2580.91	2.70311	3.28773	0.103256
mitochondria	1	5	2	no stim.	2.64953	3.33055	0.111801		ER	2	3	21	no stim.	1.75905	1.99702	14.8081		4	histamine	359.797	3069.86	2.90398	3.50062	0.0322492		5	histamine	288.118	2587.33	2.73938	3.31726	0.0915299
mitochondria	1	5	3	no stim.	2.68916	3.28368	0.107072		ER	2	3	22	no stim.	1.73457	2.0008	14.8081		4	histamine	365.649	3073.8	2.88807	3.48251	0.0387002		5	histamine	292.58	2573.79	2.71239	3.32477	0.0971844
mitochondria	1	5	4	no stim.	2.66444	3.31677	0.109612		ER	2	3	23	no stim.	1.71618	1.89651	14.8081		4	histamine	371.448	3064.61	2.91638	3.47134	0.0322353		5	histamine	297.046	2574.68	2.68619	3.37185	0.0985763
mitochondria	1	5	7	no stim.	2.67044	3.28262	0.111778		ER	2	3	24	no stim.	1.76007	2.01608	14.8081		4	histamine	377.197	3065.6	2.91342	3.50454	0.0290481		5	histamine	301.513	2574.61	2.74796	3.25977	0.0953509
mitochondria	1	5	9	no stim.	2.55303	3.31395	0.138303		ER	2	3	25	no stim.	1.74764	1.57128	14.8081		4	histamine	383.079	3063.66	2.89514	3.55318	0.0283738		5	histamine	305.995	2559.77	2.74214	3.31334	0.0912766
mitochondria	1	7	1	no stim.	2.73666	3.23569	0.100545		ER	2	3	26	no stim.	1.75623	1.3817	14.8081		4	histamine	388.861	3060.36	2.89954	3.52171	0.0309755		5	histamine	310.441	2561.66	2.77688	3.30779	0.0836251
mitochondria	1	7	2	no stim.	2.671	3.16909	0.123969		ER	2	4	1	no stim.	1.79743	1.59157	14.8081		4	histamine	394.643	3056.48	2.8624	3.48219	0.0453855		5	histamine	315	2562.76	2.68224	3.32005	0.104928
mitochondria	1	7	4	no stim.	2.76053	3.27545	0.0907579		ER	2	4	2	no stim.	1.78506	1.8409	14.8081		4	histamine	400.447	3054.29	2.87496	3.51291	0.0387624		5	ionomycin	319.491	2580.11	2.72478	3.43887	0.0826322
mitochondria	1	7	5	no stim.	2.75444	3.28438	0.0912999		ER	2	4	3	no stim.	1.75819	1.88427	14.8081		4	histamine	406.226	3059.09	2.9345	3.50039	0.0230875		5	ionomycin	324.261	2501.2	2.26636	2.65892	0.396556
mitochondria	2	1	1	no stim.	2.69957	3.24428	0.10868		ER	2	4	4	no stim.	1.72935	1.84342	14.8081		4	histamine	412.049	3064.45	2.92496	3.47277	0.0295887		5	ionomycin	328.773	2460.32	1.94866	2.4728	2.74431
mitochondria	2	1	2	no stim.	2.58161	3.21545	0.142274		ER	2	4	5	no stim.	1.71554	1.61419	14.8081		4	histamine	417.771	3070.37	2.91398	3.47917	0.031979		5	ionomycin	333.324	2459.61	1.88283	2.4667	14.8081
mitochondria	2	1	4	no stim.	2.66266	3.27854	0.114142		ER	2	4	6	no stim.	1.71845	1.70863	14.8081		4	histamine	423.566	3056.94	2.90186	3.50121	0.0327765		5	ionomycin	337.912	2447.24	1.88364	2.4287	14.8081
mitochondria	2	1	5	no stim.	2.51552	3.11967	0.173548		ER	2	4	7	no stim.	1.75959	2.14909	14.8081		4	histamine	429.392	3070.73	2.94182	3.49866	0.020903		5	ionomycin	342.613	2449.66	1.85172	2.48466	14.8081
mitochondria	2	1	6	no stim.	2.73916	3.22047	0.101513		ER	2	4	8	no stim.	1.92285	1.85313	14.8081		4	ionomycin	435.195	2850.7	2.27143	2.82194	0.339067		5	ionomycin	347.107	2427.62	1.88564	2.49294	14.8081
mitochondria	2	2	1	no stim.	2.77472	3.07843	0.107541		ER	2	4	9	no stim.	1.90641	1.91592	14.8081		4	ionomycin	441.101	2797.33	2.01283	2.61172	0.89178		5	ionomycin	351.59	2449.41	1.91002	2.39051	14.8081
mitochondria	2	2	2	no stim.	2.57098	3.25833	0.140062		ER	2	4	10	no stim.	1.84736	2.10827	14.8081		4	ionomycin	447.282	2799.96	2.01028	2.58748	0.951838		5	ionomycin	356.091	2435.44	1.87941	2.52064	14.8081
mitochondria	2	2	3	no stim.	2.56685	3.16805	0.152116		ER	2	4	11	no stim.	1.87765	1.98487	14.8081		4	ionomycin	453.083	2800.93	1.99717	2.57628	1.04828		5	ionomycin	360.603	2436.67	1.87598	2.42545	14.8081
mitochondria	2	2	4	no stim.	2.53177	3.37282	0.137017		ER	2	4	12	no stim.	1.90264	2.02919	14.8081		4	ionomycin	458.964	2802.66	2.01357	2.61678	0.879425		5	ionomycin	365.139	2437.57	1.89069	2.40364	14.8081
mitochondria	2	2	6	no stim.	2.59441	3.21311	0.139088		ER	2	4	13	no stim.	1.80206	2.20628	14.8081		4	ionomycin	464.741	2804.42	2.03165	2.56797	0.895961		5	ionomycin	369.62	2435.38	1.88938	2.44458	14.8081
mitochondria	2	4	2	no stim.	2.70685	3.27226	0.103965		ER	2	4	14	no stim.	1.68774	1.73836	14.8081		4	ionomycin	470.539	2800.88	2.00723	2.62511	0.889663		5	ionomycin	374.118	2434.94	1.89777	2.44763	14.8081
mitochondria	2	4	3	no stim.	2.45429	2.96006	0.218396		ER	2	4	15	no stim.	1.70612	1.85094	14.8081		4	ionomycin	476.305	2802.12	1.9945	2.63819	0.918125
mitochondria	2	4	4	no stim.	2.33614	2.90444	0.280696		ER	2	4	16	no stim.	1.72199	1.60152	14.8081		4	ionomycin	482.095	2803.36	1.99534	2.61672	0.959482
mitochondria	2	4	5	no stim.	2.66094	3.25237	0.1174		ER	2	4	17	no stim.	1.77158	1.83976	14.8081		4	ionomycin	487.86	2804.98	2.00133	2.61721	0.930486
mitochondria	2	5	1	no stim.	2.58513	3.13349	0.15121		ER	2	4	18	no stim.	1.79728	1.89141	14.8081		8	no stim.	0	2745.64	2.7759	3.36329	0.078281
mitochondria	2	5	2	no stim.	2.64828	3.13784	0.133413		ER	3	1	1	no stim.	1.88603	2.10427	14.8081		8	no stim.	5.832	2732.86	2.77242	3.3648	0.0789438
mitochondria	2	5	3	no stim.	2.68212	3.22886	0.114641		ER	3	1	2	no stim.	1.87144	2.18925	14.8081		8	no stim.	11.678	2733.43	2.78649	3.38469	0.0736488
mitochondria	2	5	4	no stim.	2.61601	3.3488	0.118129		ER	3	1	4	no stim.	1.87671	2.33806	14.8081		8	no stim.	17.472	2732.84	2.79961	3.3564	0.0734036
mitochondria	2	5	5	no stim.	2.55542	3.20016	0.151372		ER	3	1	5	no stim.	1.84035	2.05557	14.8081		8	no stim.	23.199	2731.92	2.79019	3.38155	0.0730958
mitochondria	3	1	1	no stim.	2.65053	3.09103	0.138196		ER	3	1	6	no stim.	1.89049	2.48671	14.8081		8	no stim.	28.98	2725.06	2.83596	3.37238	0.0632111
mitochondria	3	2	1	no stim.	2.61805	3.29324	0.123748		ER	3	1	7	no stim.	1.8363	2.34654	14.8081		8	no stim.	34.785	2730.13	2.81558	3.43312	0.0619102
mitochondria	3	2	4	no stim.	2.4726	3.21791	0.173381		ER	3	1	8	no stim.	1.6895	2.53236	14.8081		8	no stim.	40.614	2720.83	2.79105	3.38163	0.0728853
mitochondria	3	2	5	no stim.	2.53211	3.30397	0.145138		ER	3	1	9	no stim.	1.74217	2.14054	14.8081		8	no stim.	46.351	2718.66	2.83651	3.46477	0.0536378
mitochondria	3	2	7	no stim.	2.30604	3.17771	0.238406		ER	3	1	10	no stim.	1.73813	2.03866	14.8081		8	no stim.	52.12	2724.2	2.8083	3.39749	0.0672345
mitochondria	3	3	1	no stim.	2.57561	3.27013	0.137435		ER	3	1	12	no stim.	1.73875	2.22659	14.8081		8	no stim.	57.831	2720.44	2.78977	3.43977	0.0673401
mitochondria	3	3	2	no stim.	2.59091	3.20777	0.14066		ER	3	1	13	no stim.	1.70609	1.97881	14.8081		8	no stim.	63.754	2729.38	2.82241	3.40094	0.0635473
mitochondria	3	3	4	no stim.	2.53121	3.06018	0.176776		ER	3	1	14	no stim.	1.7384	2.41206	14.8081		8	no stim.	69.545	2715	2.90985	3.41804	0.040132
mitochondria	3	4	2	no stim.	2.42251	3.07005	0.212145		ER	3	1	15	no stim.	1.83043	2.55091	14.8081		8	histamine	75.577	2565.49	2.00078	2.6363	0.895126
mitochondria	3	4	3	no stim.	2.41295	3.2484	0.187895		ER	3	1	16	no stim.	1.7578	2.3416	14.8081		8	histamine	81.546	2622.58	2.27763	2.73301	0.362084
mitochondria	3	4	4	no stim.	2.45314	3.05765	0.203116		ER	3	2	1	no stim.	1.76492	1.87655	14.8081		8	histamine	87.683	2560.56	1.9219	2.43473	14.8081
mitochondria	3	4	5	no stim.	2.54478	3.1464	0.161206		ER	3	2	2	no stim.	1.67707	1.80822	14.8081		8	histamine	93.547	2577.16	1.9729	2.47935	1.79508
mitochondria	3	5	1	no stim.	2.74529	3.10132	0.112463		ER	3	2	3	no stim.	1.66586	1.74716	14.8081		8	histamine	99.48	2582.37	1.9955	2.53598	1.18384
mitochondria	3	5	2	no stim.	2.55161	2.95804	0.184434		ER	3	2	4	no stim.	1.72707	1.8111	14.8081		8	histamine	105.281	2626.81	2.17419	2.79198	0.426155
mitochondria	3	6	3	no stim.	2.53979	3.21398	0.154074		ER	3	2	5	no stim.	1.77304	2.10214	14.8081		8	histamine	111.136	2642.74	2.24075	2.88823	0.339688
mitochondria	3	6	4	no stim.	2.57195	3.23611	0.142437		ER	3	2	6	no stim.	1.79603	2.09545	14.8081		8	histamine	116.926	2637.83	2.26537	2.90603	0.319219
mitochondria	3	6	5	no stim.	2.61694	3.22305	0.131948		ER	3	2	7	no stim.	1.9176	1.91106	14.8081		8	histamine	122.702	2625.84	2.2528	2.89426	0.330198
mitochondria	3	7	1	no stim.	2.53566	3.14979	0.163457		ER	3	2	8	no stim.	1.82921	1.80539	14.8081		8	histamine	128.429	2627.3	2.24351	2.86975	0.343379
mitochondria	3	7	5	no stim.	2.51194	3.32028	0.148686		ER	3	2	9	no stim.	1.82547	2.20103	14.8081		8	histamine	134.13	2611.16	2.19291	2.82615	0.395791
mitochondria	3	7	6	no stim.	2.62658	3.14701	0.138156		ER	3	2	10	no stim.	1.7992	1.81319	14.8081		8	histamine	139.865	2594.31	2.08241	2.61756	0.672587
mitochondria	3	8	1	no stim.	2.48192	3.02522	0.198052		ER	3	2	11	no stim.	1.81966	1.30315	14.8081		8	histamine	145.588	2597.45	2.05439	2.63153	0.725606
mitochondria	3	8	2	no stim.	2.55142	3.13973	0.160116		ER	3	2	13	no stim.	1.77581	2.19094	14.8081		8	histamine	151.459	2605.62	2.08659	2.67408	0.611767
mitochondria	3	8	3	no stim.	2.62846	3.07744	0.145853		ER	3	2	14	no stim.	1.93649	1.24648	14.8081		8	histamine	157.201	2617.45	2.114	2.6744	0.56443
mitochondria	3	8	4	no stim.	2.57923	3.17153	0.148214		ER	3	2	15	no stim.	1.8455	1.36492	14.8081		8	histamine	163.001	2609.72	2.14994	2.7723	0.459662
mitochondria	3	8	5	no stim.	2.64238	3.15862	0.132602		ER	3	2	16	no stim.	1.72595	1.19431	14.8081		8	histamine	168.803	2624.27	2.17253	2.73193	0.454969
mitochondria	3	8	6	no stim.	2.64508	3.1674	0.130893		ER	3	2	17	no stim.	1.69275	1.22671	14.8081		8	histamine	174.643	2624.73	2.1809	2.80092	0.416189
mitochondria	4	1	2	no stim.	2.60539	3.11806	0.147398		ER	3	3	1	no stim.	1.63736	1.55544	14.8081		8	histamine	180.406	2610.79	2.17257	2.75783	0.442836
mitochondria	4	1	3	no stim.	2.34205	2.92239	0.273794		ER	3	3	2	no stim.	1.57768	1.41268	14.8081		8	histamine	186.222	2621.72	2.153	2.77215	0.456454
mitochondria	4	2	1	no stim.	2.67312	3.31052	0.108153		ER	3	3	4	no stim.	1.68086	1.7674	14.8081		8	histamine	191.984	2618.71	2.21548	2.76772	0.398926
mitochondria	4	2	2	no stim.	2.43251	3.1611	0.19439		ER	3	3	7	no stim.	1.63901	1.45939	14.8081		8	histamine	197.733	2633.37	2.18066	2.81018	0.412627
mitochondria	4	2	3	no stim.	2.62126	3.27918	0.124495		ER	3	3	8	no stim.	1.68337	1.33459	14.8081		8	histamine	203.542	2614.37	2.17607	2.76695	0.435241
mitochondria	4	2	4	no stim.	2.27008	3.01614	0.288811		ER	3	3	9	no stim.	1.6489	1.71752	14.8081		8	histamine	209.364	2628.73	2.19693	2.8162	0.396194
mitochondria	4	2	5	no stim.	2.30883	3.28503	0.21818		ER	3	3	10	no stim.	1.58475	1.77545	14.8081		8	histamine	215.226	2640.62	2.24042	2.84747	0.352313
mitochondria	4	3	1	no stim.	2.55229	3.27977	0.142559		ER	3	3	11	no stim.	1.68095	1.6407	14.8081		8	histamine	221.04	2631.16	2.243	2.83286	0.355096
mitochondria	4	3	2	no stim.	2.53848	3.2645	0.148189		ER	3	3	12	no stim.	1.71394	1.6286	14.8081		8	histamine	226.837	2633.57	2.2642	2.9014	0.321178
mitochondria	4	3	3	no stim.	2.41276	3.25217	0.187405		ER	3	3	13	no stim.	1.72109	1.88559	14.8081		8	histamine	232.632	2639.78	2.30875	2.86004	0.305922
mitochondria	4	3	4	no stim.	2.58348	3.20927	0.142499		ER	3	3	14	no stim.	1.81681	2.00692	14.8081		8	histamine	238.468	2647.13	2.2918	2.9579	0.291241
mitochondria	4	3	5	no stim.	2.50407	3.18188	0.168673		ER	3	3	15	no stim.	1.67161	1.71108	14.8081		8	histamine	244.22	2657.29	2.28113	2.94765	0.299451
mitochondria	4	3	8	no stim.	2.51445	3.10838	0.175419		ER	3	3	16	no stim.	1.68801	1.44558	14.8081		8	histamine	249.97	2652.96	2.27066	2.88198	0.322553
mitochondria	4	3	10	no stim.	2.68104	3.25715	0.11188		ER	3	3	17	no stim.	1.57225	0.949191	14.8081		8	histamine	255.801	2627.22	2.23287	2.79104	0.376383
mitochondria	4	3	11	no stim.	2.64641	3.19648	0.127268		ER	3	3	18	no stim.	1.54027	0.581788	14.8081		8	histamine	261.642	2628.69	2.14907	2.74548	0.474108
mitochondria	4	3	13	no stim.	2.58401	3.27659	0.134455		ER	3	3	19	no stim.	1.77719	1.22869	14.8081		8	histamine	267.437	2650.76	2.18127	2.82145	0.407566
mitochondria	4	3	14	no stim.	2.50708	3.22086	0.162642		ER	3	3	20	no stim.	1.8062	1.04508	14.8081		8	histamine	273.096	2650.71	2.27198	2.828	0.336934
mitochondria	4	3	16	no stim.	2.48077	3.05574	0.193863		ER	3	3	21	no stim.	1.81699	0.487265	14.8081		8	histamine	279.013	2658.58	2.26122	2.9062	0.321672
mitochondria	4	4	2	no stim.	2.65507	3.23522	0.120753		ER	3	3	22	no stim.	1.70909	2.05397	14.8081		8	histamine	284.797	2656.41	2.28827	2.97112	0.28996
mitochondria	4	4	3	no stim.	2.30063	2.88977	0.303034		ER	2	5t	1	ionomycin	1.91096	1.91063	14.8081		8	histamine	290.629	2666.06	2.27466	2.91199	0.312158
mitochondria	4	4	4	no stim.	2.60704	3.28299	0.127717		ER	2	5t	2	ionomycin	1.88159	2.09577	14.8081		8	histamine	296.39	2672.64	2.32626	2.91932	0.282349
mitochondria	4	5	1	no stim.	2.64125	3.21298	0.126756		ER	2	5t	3	ionomycin	1.88169	2.2013	14.8081		8	histamine	302.133	2662.68	2.27861	2.89906	0.313237
mitochondria	4	5	2	no stim.	2.11164	2.73679	0.526085		ER	2	5t	4	ionomycin	1.9247	2.26546	14.8081		8	histamine	307.875	2670.11	2.2984	2.85481	0.313233
mitochondria	4	5	3	no stim.	2.29445	2.92173	0.29854		ER	2	5t	6	ionomycin	1.83566	2.05072	14.8081		8	histamine	313.685	2669.01	2.28632	2.99029	0.286474
mitochondria	4	5	4	no stim.	2.3912	3.12952	0.213886		ER	2	5t	7	ionomycin	1.87847	2.28768	14.8081		8	histamine	319.452	2669.79	2.31714	2.93612	0.28317
mitochondria	4	5	6	no stim.	2.56608	3.2006	0.148336		ER	2	5t	8	ionomycin	2.02545	2.17578	14.8081		8	histamine	325.255	2675.96	2.31959	2.94986	0.278835
mitochondria	1	8	1	ionomycin	2.00789	2.5254	1.1274		ER	2	5t	10	ionomycin	1.97816	2.26163	14.8081		8	histamine	331.086	2704.25	2.28242	3.01081	0.283719
mitochondria	1	8	2	ionomycin	1.95765	2.47094	2.34681		ER	2	5t	11	ionomycin	1.92533	1.93218	14.8081		8	histamine	336.878	2672.13	2.31449	2.95911	0.279309
mitochondria	1	8	4	ionomycin	1.98784	2.47529	1.56204		ER	2	5t	12	ionomycin	1.94184	1.96288	14.8081		8	histamine	342.659	2675.29	2.36803	3.01506	0.243208
mitochondria	1	8	5	ionomycin	2.03101	2.57583	0.884036		ER	2	5t	14	ionomycin	1.77212	1.87747	14.8081		8	histamine	348.357	2679.67	2.40382	2.97529	0.235666
mitochondria	2	6	2	ionomycin	1.95007	2.40356	14.8081		ER	2	5t	16	ionomycin	1.73545	1.74101	14.8081		8	histamine	354.08	2672.17	2.37552	3.00392	0.242144
mitochondria	2	6	3	ionomycin	1.84211	2.49973	14.8081		ER	2	5t	18	ionomycin	1.87338	2.00061	14.8081		8	histamine	359.797	2680.66	2.40491	3.05247	0.221669
mitochondria	2	6	5	ionomycin	1.89777	2.44763	14.8081		ER	2	5t	19	ionomycin	1.93468	2.05231	14.8081		8	histamine	365.649	2689.77	2.41012	3.0927	0.212992
mitochondria	3	9	1	ionomycin	1.92358	2.47901	6.34617		ER	2	5t	20	ionomycin	1.86973	1.95231	14.8081		8	histamine	371.448	2709.44	2.40512	3.1247	0.209605
mitochondria	3	9	2	ionomycin	1.84449	2.34317	14.8081		mitochondria	1	1	1	no stim.	2.66161	3.09999	0.134189		8	histamine	377.197	2696.49	2.52229	3.17738	0.163823
mitochondria	3	9	3	ionomycin	2.00336	2.485	1.31751		mitochondria	1	1	2	no stim.	2.67738	3.13882	0.125675		8	histamine	383.079	2701.16	2.5279	3.14247	0.166728
mitochondria	3	9	4	ionomycin	1.91241	2.32165	14.8081		mitochondria	1	1	3	no stim.	2.76533	3.15889	0.101515		8	histamine	388.861	2697.51	2.51953	3.14904	0.16838
mitochondria	3	9	5	ionomycin	1.74672	2.52333	14.8081		mitochondria	1	1	4	no stim.	2.64896	3.2272	0.123191		8	histamine	394.643	2698.94	2.51599	3.15653	0.168452
mitochondria	3	9	6	ionomycin	1.95415	2.5158	1.84433		mitochondria	1	1	5	no stim.	2.74479	3.08017	0.114833		8	histamine	400.447	2690.02	2.47719	3.1666	0.179047
mitochondria	4	7	1	ionomycin	1.99408	2.54442	1.16536		mitochondria	1	1	6	no stim.	2.73818	3.11331	0.112972		8	histamine	406.226	2703.31	2.54499	3.14	0.16197
mitochondria	4	7	2	ionomycin	1.94733	2.54755	1.69053		mitochondria	1	1	7	no stim.	2.63982	3.02333	0.149169		8	histamine	412.049	2713.68	2.55146	3.21557	0.150584
mitochondria	4	7	3	ionomycin	1.90845	2.56343	2.67503		mitochondria	1	1	8	no stim.	2.70948	3.15303	0.115935		8	histamine	417.771	2710.74	2.54749	3.2235	0.150718
mitochondria	4	7	4	ionomycin	1.85295	2.3764	14.8081		mitochondria	1	1	9	no stim.	2.79342	3.21302	0.0892472		8	histamine	423.566	2717.36	2.60303	3.25374	0.132086
mitochondria	4	7	6	ionomycin	1.98965	2.50135	1.38564		mitochondria	1	1	10	no stim.	2.63542	3.08913	0.142539		8	histamine	429.392	2715.16	2.58245	3.16573	0.148022
mitochondria	4	7	8	ionomycin	2.14053	2.71312	0.501988		mitochondria	1	1	11	no stim.	2.63895	3.01008	0.15102		8	ionomycin	435.195	2609.07	1.97759	2.49493	1.58384
nuclear	1	1	1	no stim.	2.95132	3.47349	0.0212632		mitochondria	1	1	12	no stim.	2.66201	3.08646	0.135631		8	ionomycin	441.101	2627.69	2.02254	2.55074	0.973119
nuclear	1	1	2	no stim.	2.81386	3.39387	0.0662848		mitochondria	1	1	13	no stim.	2.71154	3.12804	0.118106		8	ionomycin	447.282	2622.38	1.99893	2.52422	1.19874
nuclear	1	1	3	no stim.	2.87525	3.46277	0.0442127		mitochondria	1	2	1	no stim.	2.66543	3.13682	0.129007		8	ionomycin	453.083	2625.76	1.966	2.49964	1.74934
nuclear	1	1	4	no stim.	2.92797	3.47315	0.0286525		mitochondria	1	2	2	no stim.	2.69358	3.20033	0.114845		8	ionomycin	458.964	2631.35	1.94758	2.50329	2.17901
nuclear	1	1	5	no stim.	2.95105	3.42185	0.0281823		mitochondria	1	2	3	no stim.	2.726	3.18747	0.108167		8	ionomycin	464.741	2620.84	1.9736	2.44398	2.20271
nuclear	1	1	6	no stim.	2.82575	3.4321	0.0595891		mitochondria	1	2	4	no stim.	2.60083	3.12234	0.148154		8	ionomycin	470.539	2617.46	1.9673	2.45784	2.20604
nuclear	1	2	1	no stim.	2.89539	3.46578	0.0386342		mitochondria	1	2	5	no stim.	2.6729	3.14305	0.126367		8	ionomycin	476.305	2622.43	1.94891	2.40864	14.8081
nuclear	1	2	2	no stim.	2.84706	3.48242	0.0492022		mitochondria	1	2	6	no stim.	2.72026	3.13433	0.115229		8	ionomycin	482.095	2613.31	1.97369	2.42848	2.47511
nuclear	1	2	3	no stim.	2.66276	3.21198	0.121352		mitochondria	1	2	7	no stim.	2.66536	3.17957	0.124261		8	ionomycin	487.86	2617.07	1.95012	2.41842	6.74026
nuclear	1	2	4	no stim.	2.82791	3.32584	0.069796		mitochondria	1	2	8	no stim.	2.62249	3.05385	0.150373		9	no stim.	0	4085.67	2.87706	3.35588	0.0550002
nuclear	1	2	6	no stim.	2.82747	3.44796	0.0575558		mitochondria	1	2	9	no stim.	2.73691	3.14995	0.109419		9	no stim.	5.832	4091.61	2.87483	3.37672	0.0533981
nuclear	1	2	8	no stim.	2.84931	3.4462	0.0524426		mitochondria	1	2	10	no stim.	2.76304	3.1398	0.104045		9	no stim.	11.678	4084.67	2.8953	3.38281	0.0476822
nuclear	1	2	9	no stim.	2.92622	3.48133	0.0281496		mitochondria	1	2	11	no stim.	2.62257	3.14714	0.139223		9	no stim.	17.472	4089.96	2.90927	3.39944	0.04233
nuclear	1	2	10	no stim.	2.89522	3.44716	0.0407538		mitochondria	1	2	12	no stim.	2.58607	3.17176	0.146284		9	no stim.	23.199	4091.32	2.89341	3.38106	0.0483425
nuclear	1	3	1	no stim.	2.78946	3.34357	0.0770755		mitochondria	1	2	13	no stim.	2.6306	3.15019	0.136706		9	no stim.	28.98	4082	2.9004	3.37964	0.046733
nuclear	1	3	3	no stim.	2.85939	3.39625	0.0551497		mitochondria	1	2	14	no stim.	2.62946	3.18659	0.132819		9	no stim.	34.785	4085.14	2.92187	3.40669	0.0382033
nuclear	1	3	5	no stim.	2.87044	3.39856	0.0522097		mitochondria	1	2	15	no stim.	2.6064	3.17871	0.139895		9	no stim.	40.614	4088.94	2.92919	3.41432	0.0353456
nuclear	1	4	1	no stim.	2.81429	3.37969	0.0676091		mitochondria	1	2	16	no stim.	2.66289	3.16737	0.126253		9	no stim.	46.351	4088.19	2.91982	3.39912	0.0395971
nuclear	1	4	2	no stim.	2.69561	3.26783	0.107166		mitochondria	1	2	17	no stim.	2.70024	3.23442	0.109559		9	no stim.	52.12	4084.06	2.91428	3.39452	0.0415644
nuclear	1	4	3	no stim.	2.65978	3.33574	0.108734		mitochondria	1	2	18	no stim.	2.60472	3.18079	0.140103		9	no stim.	57.831	4089.58	2.9501	3.41309	0.0295531
nuclear	1	4	4	no stim.	2.8207	3.37121	0.0669482		mitochondria	1	3	1	no stim.	2.81175	3.11976	0.0942662		9	no stim.	63.754	4089.56	2.93469	3.40262	0.0351826
nuclear	1	5	1	no stim.	2.8839	3.45114	0.0432546		mitochondria	1	3	2	no stim.	2.71767	3.06653	0.123219		9	no stim.	69.545	4048.6	3.02249	3.33768	0.015965
nuclear	1	5	2	no stim.	2.79416	3.36102	0.0742216		mitochondria	1	3	3	no stim.	2.67081	3.07602	0.134471		9	histamine	75.577	3792.81	2.06323	2.57855	0.767859
nuclear	1	5	3	no stim.	2.85473	3.44248	0.0515005		mitochondria	1	3	4	no stim.	2.5095	2.78385	0.226518		9	histamine	81.546	3859.14	2.19706	2.80624	0.399876
nuclear	1	5	4	no stim.	2.83431	3.38583	0.0622431		mitochondria	1	3	5	no stim.	2.76065	3.08213	0.110649		9	histamine	87.683	3963.93	2.45832	3.07576	0.198521
nuclear	1	5	5	no stim.	2.96116	3.44476	0.0219921		mitochondria	1	3	6	no stim.	2.68427	3.09293	0.128994		9	histamine	93.547	4028.36	2.66836	3.248	0.116015
nuclear	1	5	6	no stim.	2.88948	3.45261	0.04165		mitochondria	1	3	7	no stim.	2.70526	3.12593	0.11993		9	histamine	99.48	4022.7	2.67146	3.19316	0.121204
nuclear	1	6	1	no stim.	2.86458	3.43845	0.0494885		mitochondria	1	3	8	no stim.	2.74254	3.08739	0.114631		9	histamine	105.281	3961.42	2.56331	3.14417	0.156104
nuclear	1	6	3	no stim.	2.94167	3.4756	0.0241315		mitochondria	1	3	9	no stim.	2.75817	3.16097	0.103043		9	histamine	111.136	3968.15	2.59084	3.15384	0.147126
nuclear	1	6	4	no stim.	2.78949	3.36834	0.0745845		mitochondria	1	3	10	no stim.	2.7729	3.06173	0.109733		9	histamine	116.926	4013.21	2.66287	3.20282	0.122331
nuclear	1	6	6	no stim.	2.80243	3.33395	0.0749892		mitochondria	1	3	11	no stim.	2.6834	3.06728	0.132109		9	histamine	122.702	3981.53	2.64686	3.20166	0.126571
nuclear	1	6	7	no stim.	2.7485	3.29306	0.0918296		mitochondria	1	3	12	no stim.	2.61262	3.10702	0.146712		9	histamine	128.429	3965.2	2.60899	3.15973	0.141429
nuclear	1	7	3	no stim.	2.92466	3.44241	0.0333315		mitochondria	1	3	13	no stim.	2.70523	3.09712	0.123081		9	histamine	134.13	3971.55	2.61993	3.20508	0.133219
nuclear	1	8	1	no stim.	2.87269	3.43782	0.0475318		mitochondria	1	3	14	no stim.	2.76873	2.98625	0.118767		9	histamine	139.865	4007.95	2.71674	3.26833	0.101979
nuclear	1	8	2	no stim.	2.8796	3.44118	0.0454312		mitochondria	1	3	15	no stim.	2.7623	3.03906	0.114781		9	histamine	145.588	3994.94	2.70181	3.26707	0.105734
nuclear	1	8	3	no stim.	2.79139	3.29861	0.0811285		mitochondria	1	3	16	no stim.	2.91149	3.00373	0.081843		9	histamine	151.459	3964.18	2.61423	3.16429	0.139472
nuclear	1	8	5	no stim.	2.88732	3.38756	0.0491807		mitochondria	1	3	17	no stim.	2.90079	3.00235	0.0845509		9	histamine	157.201	3988.85	2.69772	3.28136	0.10523
nuclear	1	8	6	no stim.	2.8264	3.42375	0.060285		mitochondria	1	3	18	no stim.	2.76298	3.10198	0.107992		9	histamine	163.001	4017.33	2.78413	3.35169	0.0775123
nuclear	1	8	7	no stim.	2.8155	3.36778	0.0685205		mitochondria	1	3	19	no stim.	2.80426	3.01035	0.107272		9	histamine	168.803	3985.25	2.72633	3.27006	0.0994858
nuclear	1	8	8	no stim.	2.68896	3.36153	0.0989847		mitochondria	1	3	20	no stim.	2.77561	3.00807	0.114696		9	histamine	174.643	3968.52	2.68079	3.24596	0.113139
nuclear	2	1	1	no stim.	2.86724	3.40179	0.052661		mitochondria	1	3	21	no stim.	2.88684	3.06641	0.0815779		9	histamine	180.406	3998.78	2.78121	3.34128	0.0792421
nuclear	2	1	2	no stim.	2.71229	3.16843	0.113583		mitochondria	1	3	22	no stim.	2.78553	3.08977	0.1037		9	histamine	186.222	3999.85	2.8465	3.38274	0.0596439
nuclear	2	1	4	no stim.	2.85988	3.29456	0.0653459		mitochondria	1	3	23	no stim.	2.7345	3.05015	0.12067		9	histamine	191.984	3989.6	2.81769	3.35004	0.0697827
nuclear	2	1	6	no stim.	2.80323	3.33404	0.0747926		mitochondria	1	3	24	no stim.	2.70849	3.05133	0.127282		9	histamine	197.733	3969.72	2.7891	3.30556	0.0809702
nuclear	2	1	7	no stim.	2.69847	3.30955	0.102101		mitochondria	1	4	1	no stim.	2.704	3.03433	0.130355		9	histamine	203.542	3988.68	2.81412	3.37264	0.0683579
nuclear	2	1	8	no stim.	2.8556	3.3569	0.0600833		mitochondria	1	4	2	no stim.	2.83082	3.07129	0.0945515		9	histamine	209.364	4002.06	2.8805	3.43347	0.0460266
nuclear	2	1	10	no stim.	2.6624	3.21838	0.12074		mitochondria	1	4	3	no stim.	2.86823	3.08711	0.0839813		9	histamine	215.226	4000.11	2.88686	3.40683	0.0472606
nuclear	2	2	3	no stim.	2.76727	3.27768	0.088934		mitochondria	1	4	4	no stim.	2.74709	3.12201	0.109832		9	histamine	221.04	3987.25	2.85076	3.37356	0.0595525
nuclear	2	2	5	no stim.	2.87619	3.28456	0.0624543		mitochondria	1	4	5	no stim.	2.71925	3.01082	0.128949		9	histamine	226.837	3979.21	2.85069	3.3741	0.0595155
nuclear	2	2	6	no stim.	2.81804	3.30034	0.0746742		mitochondria	1	4	6	no stim.	2.66951	3.0846	0.133838		9	histamine	232.632	3978.95	2.84727	3.38672	0.0590536
nuclear	2	2	7	no stim.	2.72931	3.30326	0.0953553		mitochondria	1	4	7	no stim.	2.63703	3.06655	0.144771		9	histamine	238.468	3991.46	2.89189	3.41255	0.045378
nuclear	2	2	8	no stim.	2.73403	3.26707	0.0979422		mitochondria	1	4	8	no stim.	2.69845	3.15174	0.118862		9	histamine	244.22	4004.9	2.91088	3.42945	0.0385871
nuclear	2	2	9	no stim.	2.80746	3.2762	0.079583		mitochondria	1	4	9	no stim.	2.72012	3.00106	0.129805		9	histamine	249.97	3981.58	2.89951	3.44805	0.0395258
nuclear	2	2	11	no stim.	2.8372	3.30706	0.0694775		mitochondria	1	4	10	no stim.	2.74361	3.03193	0.120302		9	histamine	255.801	3983.69	2.88666	3.41223	0.0467371
nuclear	2	3	1	no stim.	2.82147	3.30854	0.0730454		mitochondria	1	4	11	no stim.	2.67163	2.90515	0.154401		9	histamine	261.642	3976.34	2.88852	3.42856	0.0445145
nuclear	2	3	2	no stim.	2.7759	3.32773	0.0818529		mitochondria	1	4	12	no stim.	2.73522	3.06383	0.119008		9	histamine	267.437	3978.41	2.85225	3.4313	0.0532715
nuclear	2	3	3	no stim.	2.71528	3.30805	0.0982168		mitochondria	1	4	13	no stim.	2.68961	3.08358	0.128637		9	histamine	273.096	3985.44	2.8815	3.42682	0.0464849
nuclear	2	3	4	no stim.	2.88454	3.32645	0.0561935		mitochondria	1	4	14	no stim.	2.67111	2.89446	0.155861		9	histamine	279.013	3974.92	2.90813	3.41418	0.0410121
nuclear	2	3	6	no stim.	2.64464	3.07455	0.141727		mitochondria	1	4	15	no stim.	2.76034	2.99881	0.119573		9	histamine	284.797	3975.84	2.9188	3.44621	0.0345177
nuclear	2	3	7	no stim.	2.80417	3.28781	0.0791966		mitochondria	1	4	16	no stim.	2.61348	2.87582	0.175799		9	histamine	290.629	3964.53	2.91126	3.44126	0.0371506
nuclear	2	3	8	no stim.	2.7565	3.30591	0.0886275		mitochondria	1	4	17	no stim.	2.63665	3.03226	0.148985		9	histamine	296.39	3960.75	2.89457	3.42898	0.0429159
nuclear	2	3	9	no stim.	2.76048	3.29559	0.0887295		mitochondria	1	4	18	no stim.	2.5654	3.05183	0.167343		9	histamine	302.133	3917.69	2.83905	3.39608	0.0600722
nuclear	2	3	10	no stim.	2.80536	3.31497	0.0762006		mitochondria	1	4	19	no stim.	2.65974	3.02618	0.143259		9	histamine	307.875	3939.16	2.8617	3.40398	0.0537912
nuclear	2	3	11	no stim.	2.61765	3.29455	0.123703		mitochondria	1	4	20	no stim.	2.69122	3.07604	0.129059		9	histamine	313.685	3954.35	2.89642	3.45685	0.0393604
nuclear	2	3	12	no stim.	2.86102	3.25899	0.0686337		mitochondria	1	4	21	no stim.	2.62669	3.03168	0.151884		9	histamine	319.452	3959.41	2.92224	3.45768	0.0322027
nuclear	2	4	1	no stim.	2.78709	3.33878	0.0781119		mitochondria	1	4	22	no stim.	2.64748	3.07281	0.141152		9	histamine	325.255	3951.65	2.91854	3.4681	0.0320069
nuclear	2	4	2	no stim.	2.74586	3.34096	0.0875923		mitochondria	1	4	23	no stim.	2.73487	3.05488	0.120063		9	histamine	331.086	3948.38	2.91807	3.44162	0.035253
nuclear	2	4	3	no stim.	2.78285	3.29506	0.083498		mitochondria	1	4	24	no stim.	2.75213	3.14269	0.106422		9	histamine	336.878	3933.79	2.91145	3.46489	0.0343771
nuclear	2	4	4	no stim.	2.81806	3.19385	0.0853105		mitochondria	1	4	25	no stim.	2.73572	3.07169	0.118038		9	histamine	342.659	3937.79	2.92201	3.44242	0.0340692
nuclear	2	4	7	no stim.	2.83804	3.32161	0.0678234		mitochondria	1	4	26	no stim.	2.74974	3.08043	0.113559		9	histamine	348.357	3926.92	2.94158	3.44439	0.0281962
nuclear	2	4	8	no stim.	2.74633	3.23904	0.0978671		mitochondria	2	1	1	no stim.	2.70748	3.14989	0.116777		9	histamine	354.08	3939.28	2.95046	3.46095	0.0232799
nuclear	2	4	9	no stim.	2.6341	3.17062	0.13342		mitochondria	2	1	2	no stim.	2.68942	3.1757	0.11855		9	histamine	359.797	3929.74	2.9588	3.48698	0.0165987
nuclear	2	4	10	no stim.	2.78951	3.20368	0.091122		mitochondria	2	1	3	no stim.	2.86441	3.24979	0.0687469		9	histamine	365.649	3923.96	2.93593	3.46041	0.0278736
nuclear	2	4	11	no stim.	2.80319	3.33367	0.0748384		mitochondria	2	1	4	no stim.	2.76256	3.11297	0.10695		9	histamine	371.448	3922.95	2.94906	3.46472	0.0232207
nuclear	3	1	2	no stim.	2.85062	3.3464	0.0623388		mitochondria	2	1	5	no stim.	2.78741	3.10371	0.101805		9	histamine	377.197	3918.52	2.94466	3.49227	0.0208515
nuclear	3	1	3	no stim.	2.78517	3.33779	0.0786617		mitochondria	2	1	6	no stim.	2.75774	2.95005	0.125523		9	histamine	383.079	3918.73	2.95212	3.47479	0.0208072
nuclear	3	1	4	no stim.	2.7603	3.35722	0.0825517		mitochondria	2	1	7	no stim.	2.58159	3.03087	0.165191		9	histamine	388.861	3911.61	2.93818	3.49022	0.0232828
nuclear	3	1	5	no stim.	2.67553	3.19467	0.120005		mitochondria	2	1	8	no stim.	2.59497	3.1576	0.145528		9	histamine	394.643	3913.52	2.96659	3.48203	0.0143659
nuclear	3	1	6	no stim.	2.85732	3.36528	0.05882		mitochondria	2	1	9	no stim.	2.59439	3.14329	0.147415		9	histamine	400.447	3910.95	2.94043	3.47943	0.0240135
nuclear	3	2	1	no stim.	2.75989	3.30437	0.087982		mitochondria	2	1	10	no stim.	2.70205	3.14515	0.118661		9	histamine	406.226	3914.2	2.95488	3.492	0.0172755
nuclear	3	2	3	no stim.	2.94213	3.32754	0.0416059		mitochondria	2	1	11	no stim.	2.64233	3.16946	0.13138		9	histamine	412.049	3902.45	2.94922	3.49227	0.0192753
nuclear	3	2	4	no stim.	2.93815	3.3893	0.0357639		mitochondria	2	1	12	no stim.	2.66453	3.08904	0.134661		9	histamine	417.771	3900.34	2.93826	3.47664	0.0250718
nuclear	3	2	5	no stim.	2.86612	3.28162	0.0651554		mitochondria	2	1	13	no stim.	2.69018	3.15083	0.121064		9	histamine	423.566	3894.81	2.96414	3.44611	0.0207975
nuclear	3	2	6	no stim.	2.85155	3.28017	0.0687654		mitochondria	2	1	14	no stim.	2.68963	3.13368	0.123084		9	histamine	429.392	3911.07	2.9566	3.4977	0.0157249
nuclear	3	3	1	no stim.	2.70234	3.28446	0.103783		mitochondria	2	1	15	no stim.	2.7574	3.17011	0.102287		9	ionomycin	435.195	3870.81	2.7421	3.28557	0.0941153
nuclear	3	3	2	no stim.	2.69794	3.2735	0.106001		mitochondria	2	2	1	no stim.	2.60443	2.97366	0.165715		9	ionomycin	441.101	3840.99	2.57774	3.18575	0.146901
nuclear	3	3	4	no stim.	2.75178	3.27866	0.0925132		mitochondria	2	2	2	no stim.	2.74713	3.1252	0.109486		9	ionomycin	447.282	3808.47	2.47938	3.02434	0.199067
nuclear	3	3	5	no stim.	2.54072	3.10261	0.168125		mitochondria	2	2	3	no stim.	2.65521	3.14589	0.130666		9	ionomycin	453.083	3770.69	2.35952	2.94084	0.261589
nuclear	3	3	6	no stim.	2.76582	3.25553	0.0915227		mitochondria	2	2	4	no stim.	2.66758	3.11137	0.131312		9	ionomycin	458.964	3731.34	2.24935	2.78752	0.365128
nuclear	3	3	7	no stim.	2.74155	3.26218	0.0966415		mitochondria	2	2	5	no stim.	2.68804	3.07829	0.129643		9	ionomycin	464.741	3699.35	2.14747	2.66268	0.52275
nuclear	3	4	1	no stim.	2.61858	3.34547	0.117851		mitochondria	2	2	6	no stim.	2.75991	3.08014	0.111042		9	ionomycin	470.539	3675.71	2.07432	2.56812	0.749177
nuclear	3	4	2	no stim.	2.71829	3.33842	0.0943762		mitochondria	2	2	7	no stim.	2.77808	3.05887	0.108743		9	ionomycin	476.305	3667.63	2.02892	2.55553	0.932308
nuclear	3	4	3	no stim.	2.67802	3.25389	0.112976		mitochondria	2	2	8	no stim.	2.77114	3.00535	0.116117		9	ionomycin	482.095	3650.48	2.02582	2.51138	1.05195
nuclear	3	4	4	no stim.	2.62363	3.34246	0.116923		mitochondria	2	2	9	no stim.	2.78464	3.19638	0.0930257		9	ionomycin	487.86	3647.58	2.03357	2.51377	1.00194
nuclear	3	4	5	no stim.	2.72843	3.3105	0.0948241		mitochondria	2	2	10	no stim.	2.761	3.07262	0.111563
nuclear	3	4	6	no stim.	2.60342	3.37924	0.117937		mitochondria	2	2	11	no stim.	2.69415	3.08077	0.127762
nuclear	3	4	7	no stim.	2.59923	3.34219	0.12308		mitochondria	2	2	12	no stim.	2.6836	3.05954	0.132929
nuclear	3	4	8	no stim.	2.46104	3.05399	0.200911		mitochondria	2	3	1	no stim.	2.73064	3.12685	0.113424
nuclear	3	4	9	no stim.	2.61968	3.34261	0.117892		mitochondria	2	3	2	no stim.	2.6692	3.033	0.139861
nuclear	3	4	10	no stim.	2.54879	3.31647	0.139137		mitochondria	2	3	3	no stim.	2.7162	3.10381	0.119542
nuclear	3	4	11	no stim.	2.78101	3.31744	0.0816827		mitochondria	2	3	4	no stim.	2.70086	3.14268	0.119232
nuclear	1	9	1	ionomycin	1.8467	2.33365	14.8081		mitochondria	2	3	5	no stim.	2.67133	3.07829	0.134071
nuclear	1	9	2	ionomycin	1.90367	2.38235	14.8081		mitochondria	2	3	6	no stim.	2.79554	3.10878	0.0993045
nuclear	1	9	3	ionomycin	1.89097	2.294	14.8081		mitochondria	2	3	7	no stim.	2.80482	3.1335	0.0945473
nuclear	1	9	6	ionomycin	1.80953	2.3383	14.8081		mitochondria	2	3	8	no stim.	2.67404	3.08351	0.132756
nuclear	1	9	7	ionomycin	1.87787	2.35244	14.8081		mitochondria	2	3	9	no stim.	2.79067	3.1502	0.0962647
nuclear	1	9	8	ionomycin	1.94766	2.23935	14.8081		mitochondria	2	3	10	no stim.	2.79245	3.16907	0.0939207
nuclear	2	5	1	ionomycin	1.84962	2.32414	14.8081		mitochondria	2	3	11	no stim.	2.67162	3.11659	0.129661
nuclear	2	5	2	ionomycin	1.81902	2.37311	14.8081		mitochondria	2	3	12	no stim.	2.7805	3.14636	0.0991172
nuclear	2	5	3	ionomycin	1.92971	2.36329	14.8081		mitochondria	2	3	13	no stim.	2.74216	3.01044	0.123004
nuclear	2	5	4	ionomycin	1.80946	2.36094	14.8081		mitochondria	2	3	14	no stim.	2.69299	3.24722	0.109989
nuclear	2	5	6	ionomycin	1.94144	2.54473	1.83375		mitochondria	2	3	15	no stim.	2.68339	3.14893	0.123011
nuclear	2	5	7	ionomycin	1.8508	2.28964	14.8081		mitochondria	2	3	16	no stim.	2.67401	3.06307	0.135093
nuclear	2	5	8	ionomycin	1.86815	2.31507	14.8081		mitochondria	2	3	17	no stim.	2.88536	2.9535	0.0931089
nuclear	2	5	9	ionomycin	1.85833	2.22712	14.8081		mitochondria	2	4	1	no stim.	2.63939	3.06989	0.143721
nuclear	2	5	10	ionomycin	1.8629	2.29071	14.8081		mitochondria	2	4	2	no stim.	2.64015	3.02954	0.148328
nuclear	2	5	11	ionomycin	1.8813	2.31421	14.8081		mitochondria	2	4	3	no stim.	2.62157	3.01155	0.155837
nuclear	3	5	2	ionomycin	1.87159	2.23495	14.8081		mitochondria	2	4	4	no stim.	2.6022	2.95222	0.169186
nuclear	3	5	3	ionomycin	1.88032	2.2923	14.8081		mitochondria	2	4	5	no stim.	2.65978	2.94455	0.153024
nuclear	3	5	4	ionomycin	1.86363	2.31965	14.8081		mitochondria	2	4	6	no stim.	2.70587	3.0822	0.124554
nuclear	3	5	5	ionomycin	1.78398	2.29289	14.8081		mitochondria	2	4	7	no stim.	2.67678	3.12449	0.127426
nuclear	3	5	7	ionomycin	1.87586	2.31299	14.8081		mitochondria	2	4	8	no stim.	2.61484	3.12223	0.144277
nuclear	3	5	10	ionomycin	1.92325	2.40083	14.8081		mitochondria	2	4	9	no stim.	2.64661	3.05343	0.143674
									mitochondria	2	4	10	no stim.	2.75559	3.08424	0.11169
									mitochondria	2	4	11	no stim.	2.7272	3.028	0.124969
									mitochondria	2	4	12	no stim.	2.71246	3.03269	0.128307
									mitochondria	2	4	13	no stim.	2.71033	3.10885	0.120493
									mitochondria	2	4	14	no stim.	2.79136	2.97303	0.1144
									mitochondria	3	1	1	no stim.	2.76746	3.21279	0.0954751
									mitochondria	3	1	2	no stim.	2.84244	3.13803	0.0850777
									mitochondria	3	1	3	no stim.	2.79501	3.06029	0.104407
									mitochondria	3	1	4	no stim.	2.66887	3.21458	0.119517
									mitochondria	3	1	5	no stim.	2.6367	3.17256	0.132513
									mitochondria	3	1	6	no stim.	2.67935	3.21083	0.117281
									mitochondria	3	1	7	no stim.	2.7043	3.21327	0.110797
									mitochondria	3	1	8	no stim.	2.6588	3.13822	0.13059
									mitochondria	3	1	9	no stim.	2.76225	3.18684	0.099386
									mitochondria	3	2	1	no stim.	2.83215	3.25683	0.0756854
									mitochondria	3	2	2	no stim.	2.7676	3.08896	0.108205
									mitochondria	3	2	3	no stim.	2.59083	3.26797	0.133653
									mitochondria	3	2	4	no stim.	2.79934	3.05388	0.104
									mitochondria	3	2	5	no stim.	2.77296	3.18671	0.0968154
									mitochondria	3	2	6	no stim.	2.85839	3.10304	0.0847528
									mitochondria	3	2	7	no stim.	2.98899	2.9664	0.0668376
									mitochondria	3	2	8	no stim.	2.92909	2.93338	0.0845024
									mitochondria	3	2	9	no stim.	2.75783	3.11145	0.108279
									mitochondria	3	2	10	no stim.	2.70909	3.188	0.112294
									mitochondria	3	2	11	no stim.	2.71128	3.28066	0.102015
									mitochondria	3	2	12	no stim.	2.6057	3.01588	0.159936
									mitochondria	3	2	13	no stim.	2.73044	3.15319	0.110681
									mitochondria	3	2	14	no stim.	2.81098	3.19331	0.0870481
									mitochondria	3	2	15	no stim.	2.84097	3.17044	0.0822015
									mitochondria	3	2	16	no stim.	2.80975	3.19093	0.0875787
									mitochondria	3	2	17	no stim.	2.75513	3.1393	0.106039
									mitochondria	3	2	18	no stim.	2.92582	3.1727	0.0617289
									mitochondria	3	2	19	no stim.	2.90515	3.16969	0.0670014
									mitochondria	3	2	20	no stim.	2.70129	3.06797	0.127319
									mitochondria	3	2	21	no stim.	2.72254	3.22111	0.105489
									mitochondria	3	3	1	no stim.	2.84008	3.13072	0.0863708
									mitochondria	3	3	2	no stim.	2.83356	3.1036	0.0906439
									mitochondria	3	3	3	no stim.	2.74451	3.10047	0.112748
									mitochondria	3	3	4	no stim.	2.76583	3.07737	0.109859
									mitochondria	3	3	5	no stim.	2.90347	3.00327	0.083816
									mitochondria	3	3	6	no stim.	2.71856	3.04258	0.125616
									mitochondria	3	3	7	no stim.	2.77436	3.0813	0.107329
									mitochondria	3	3	8	no stim.	2.70486	3.09214	0.123723
									mitochondria	3	3	9	no stim.	2.76533	3.15656	0.101753
									mitochondria	3	3	10	no stim.	2.77413	3.03576	0.112149
									mitochondria	3	3	11	no stim.	2.64623	3.08586	0.139966
									mitochondria	3	3	12	no stim.	2.8846	3.08956	0.0798302
									mitochondria	3	3	13	no stim.	2.68101	3.14052	0.12455
									mitochondria	3	3	14	no stim.	2.69802	3.2116	0.112533
									mitochondria	3	3	15	no stim.	2.70632	3.17239	0.114653
									mitochondria	3	3	16	no stim.	2.74612	3.05232	0.117469
									mitochondria	3	3	17	no stim.	2.68279	3.1522	0.122804
									mitochondria	3	3	18	no stim.	2.8032	3.15878	0.09238
									mitochondria	3	3	19	no stim.	2.78024	3.1937	0.094352
									mitochondria	3	3	20	no stim.	2.7239	3.18971	0.108449
									mitochondria	3	3	21	no stim.	2.73064	3.14298	0.111712
									mitochondria	3	3	23	no stim.	2.90843	3.03334	0.0796691
									mitochondria	3	3	24	no stim.	2.88409	3.0447	0.0843815
									mitochondria	3	3	25	no stim.	2.74298	3.09656	0.113545
									mitochondria	3	3	26	no stim.	2.83923	3.17768	0.0818929
									mitochondria	1	5t	1	ionomycin	2.01045	2.44615	1.43115
									mitochondria	1	5t	2	ionomycin	2.01891	2.40921	1.53619
									mitochondria	1	5t	3	ionomycin	2.10229	2.48616	0.773671
									mitochondria	1	5t	4	ionomycin	2.0424	2.4589	1.0943
									mitochondria	1	5t	5	ionomycin	2.03496	2.46355	1.13118
									mitochondria	1	5t	6	ionomycin	1.82362	2.35375	14.8081
									mitochondria	1	5t	7	ionomycin	2.05538	2.32284	1.55148
									mitochondria	1	5t	8	ionomycin	1.86531	2.1806	14.8081
									mitochondria	1	5t	9	ionomycin	2.04953	2.42207	1.15811
									mitochondria	1	5t	10	ionomycin	2.03421	2.48538	1.07158
									mitochondria	1	5t	11	ionomycin	1.8144	1.99384	14.8081
									mitochondria	1	5t	12	ionomycin	1.93834	2.39922	14.8081
									mitochondria	1	5t	13	ionomycin	1.94202	2.35256	14.8081
									mitochondria	1	5t	14	ionomycin	1.87493	2.19432	14.8081
									mitochondria	1	5t	15	ionomycin	1.87982	2.26707	14.8081
									mitochondria	1	5t	16	ionomycin	1.98331	2.41265	2.36252
									mitochondria	1	5t	17	ionomycin	2.0006	2.47751	1.38269
									mitochondria	1	5t	18	ionomycin	1.94554	2.0632	14.8081
									mitochondria	1	5t	19	ionomycin	2.07575	2.54251	0.778748
									mitochondria	1	5t	20	ionomycin	1.93972	2.40898	14.8081
									mitochondria	1	5t	21	ionomycin	1.82924	2.36534	14.8081
									mitochondria	1	5t	22	ionomycin	2.07698	2.54394	0.773042
									mitochondria	1	5t	23	ionomycin	2.0594	2.48112	0.944839
									mitochondria	1	5t	25	ionomycin	2.03928	2.45074	1.14075
									mitochondria	1	5t	26	ionomycin	2.07308	2.52441	0.813446
									mitochondria	2	5t	1	ionomycin	2.05588	2.4781	0.968422
									mitochondria	2	5t	2	ionomycin	2.04343	2.42713	1.18824
									mitochondria	2	5t	3	ionomycin	2.09119	2.43661	0.890474
									mitochondria	2	5t	4	ionomycin	2.15505	2.51743	0.614031
									mitochondria	2	5t	5	ionomycin	2.20713	2.52025	0.526847
									mitochondria	2	5t	6	ionomycin	2.04494	2.37875	1.37363
									mitochondria	2	5t	7	ionomycin	2.04478	2.43502	1.15119
									mitochondria	2	5t	8	ionomycin	1.92363	2.44975	14.8081
									mitochondria	2	5t	9	ionomycin	2.0598	2.51871	0.871256
									mitochondria	2	5t	10	ionomycin	1.90542	2.26191	14.8081
									mitochondria	2	5t	11	ionomycin	1.90301	2.10867	14.8081
									mitochondria	2	5t	12	ionomycin	1.96614	2.26635	14.8081
									mitochondria	2	5t	13	ionomycin	1.94458	2.2906	14.8081
									mitochondria	2	5t	14	ionomycin	2.04699	2.30469	1.85153
									mitochondria	3	4t	1	ionomycin	1.89773	2.12488	14.8081
									mitochondria	3	4t	3	ionomycin	2.10629	2.44814	0.814513
									mitochondria	3	4t	6	ionomycin	2.12269	2.46524	0.740743
									mitochondria	3	4t	7	ionomycin	1.9529	2.23779	14.8081
									mitochondria	3	4t	8	ionomycin	1.92845	2.2471	14.8081
									mitochondria	3	4t	9	ionomycin	2.026	2.43706	1.30411
									mitochondria	3	4t	10	ionomycin	1.94419	2.35567	14.8081
									mitochondria	3	4t	12	ionomycin	2.16975	2.58793	0.538145
									mitochondria	3	4t	13	ionomycin	1.86726	2.41051	14.8081
									mitochondria	3	4t	14	ionomycin	2.03802	2.53894	0.924864
									mitochondria	3	4t	15	ionomycin	2.13561	2.47334	0.697548
									mitochondria	3	4t	16	ionomycin	1.95917	2.25961	14.8081
									mitochondria	3	4t	17	ionomycin	2.22518	2.67135	0.428913
									mitochondria	3	4t	18	ionomycin	2.06441	2.51289	0.863372
									mitochondria	3	4t	19	ionomycin	2.21573	2.58179	0.481096
									mitochondria	3	4t	23	ionomycin	1.98335	2.34864	5.67066
									mitochondria	3	4t	24	ionomycin	2.04606	2.45582	1.07941
									mitochondria	3	4t	25	ionomycin	1.99846	2.38295	2.28174
									mitochondria	3	4t	26	ionomycin	2.07326	2.33446	1.27843
									mitochondria	3	4t	27	ionomycin	2.03629	2.38408	1.44927
									mitochondria	3	4t	28	ionomycin	2.14322	2.52531	0.630349
									nuclear	1	1	1	no stim.	2.85631	3.24624	0.0710236
									nuclear	1	1	2	no stim.	2.7829	3.26286	0.086724
									nuclear	1	1	3	no stim.	2.86489	3.29236	0.0643714
									nuclear	1	1	4	no stim.	2.72817	3.28512	0.0974906
									nuclear	1	1	5	no stim.	2.84577	3.42002	0.0560097
									nuclear	1	1	6	no stim.	2.77361	3.17686	0.0976634
									nuclear	1	1	7	no stim.	2.82407	3.26819	0.0764614
									nuclear	1	1	8	no stim.	2.78818	3.18969	0.0928546
									nuclear	1	1	9	no stim.	2.7294	3.16497	0.109695
									nuclear	1	1	10	no stim.	2.78517	3.2362	0.0888728
									nuclear	1	1	11	no stim.	2.81059	3.19338	0.0871342
									nuclear	1	1	12	no stim.	2.77409	3.22232	0.0929189
									nuclear	1	1	13	no stim.	2.73115	3.23344	0.102111
									nuclear	1	1	14	no stim.	2.76098	3.10078	0.108613
									nuclear	1	1	15	no stim.	2.80513	3.28294	0.0794572
									nuclear	1	1	16	no stim.	2.78476	3.25929	0.0866431
									nuclear	1	1	17	no stim.	2.77112	3.28162	0.087623
									nuclear	1	1	18	no stim.	2.79658	3.32486	0.0772757
									nuclear	1	1	19	no stim.	2.85598	3.33424	0.062286
									nuclear	1	1	20	no stim.	2.80522	3.28203	0.0795274
									nuclear	1	1	21	no stim.	2.807	3.21226	0.0860924
									nuclear	1	2	1	no stim.	2.85901	3.25772	0.0692377
									nuclear	1	2	4	no stim.	2.75317	3.1692	0.103412
									nuclear	1	2	5	no stim.	2.78603	3.19276	0.0930596
									nuclear	1	2	6	no stim.	2.78871	3.27055	0.0845764
									nuclear	1	2	7	no stim.	2.77787	3.26065	0.0881412
									nuclear	1	2	8	no stim.	2.74921	3.21456	0.0996888
									nuclear	1	2	9	no stim.	2.79747	3.2323	0.0863435
									nuclear	1	2	10	no stim.	2.58453	3.06484	0.159959
									nuclear	1	2	11	no stim.	2.67616	3.23606	0.115356
									nuclear	1	2	12	no stim.	2.69681	3.18726	0.11544
									nuclear	1	2	13	no stim.	2.69932	3.22976	0.110279
									nuclear	1	2	14	no stim.	2.74216	3.18311	0.104659
									nuclear	1	2	16	no stim.	2.77145	3.24984	0.0907579
									nuclear	1	2	17	no stim.	2.71099	3.26845	0.103356
									nuclear	1	2	18	no stim.	2.78702	3.25599	0.0864404
									nuclear	1	2	19	no stim.	2.74739	3.1803	0.103672
									nuclear	1	2	20	no stim.	2.66821	3.14859	0.126967
									nuclear	1	2	21	no stim.	2.77212	3.19013	0.0966682
									nuclear	1	2	23	no stim.	2.8038	3.22116	0.0859609
									nuclear	1	2	24	no stim.	2.72462	3.2482	0.102162
									nuclear	1	3	1	no stim.	2.73618	3.04603	0.120686
									nuclear	1	3	2	no stim.	2.74731	3.25744	0.0957461
									nuclear	1	3	3	no stim.	2.73078	3.26612	0.0988212
									nuclear	1	3	4	no stim.	2.75695	3.21106	0.0981807
									nuclear	1	3	5	no stim.	2.84784	3.20236	0.0773955
									nuclear	1	3	6	no stim.	2.72614	3.16863	0.110116
									nuclear	1	3	7	no stim.	2.77076	3.22698	0.0932409
									nuclear	1	3	8	no stim.	2.72145	3.19439	0.10856
									nuclear	1	3	9	no stim.	2.74615	3.21505	0.100379
									nuclear	1	3	10	no stim.	2.63987	3.09637	0.14047
									nuclear	1	3	11	no stim.	2.74353	3.23167	0.0992997
									nuclear	1	3	12	no stim.	2.71489	3.24435	0.104927
									nuclear	1	3	13	no stim.	2.77474	3.21582	0.0934237
									nuclear	1	3	16	no stim.	2.68995	3.20776	0.114954
									nuclear	1	3	17	no stim.	2.75979	3.23699	0.0948464
									nuclear	1	3	18	no stim.	2.70994	3.22826	0.107825
									nuclear	1	3	20	no stim.	2.87756	3.34805	0.0556805
									nuclear	2	1	1	no stim.	2.70304	3.11728	0.121439
									nuclear	2	1	2	no stim.	2.68079	3.15939	0.122527
									nuclear	2	1	5	no stim.	2.75078	3.20629	0.100161
									nuclear	2	1	6	no stim.	2.66184	3.17981	0.125139
									nuclear	2	1	7	no stim.	2.74523	3.21548	0.100557
									nuclear	2	1	8	no stim.	2.6289	3.14038	0.138304
									nuclear	2	1	9	no stim.	2.69312	3.14637	0.1208
									nuclear	2	1	10	no stim.	2.72928	3.19111	0.106979
									nuclear	2	1	11	no stim.	2.73725	3.18025	0.106159
									nuclear	2	2	4	no stim.	2.71817	3.1893	0.109907
									nuclear	2	2	5	no stim.	2.74162	3.19041	0.104031
									nuclear	2	2	6	no stim.	2.69742	3.15082	0.119221
									nuclear	2	2	7	no stim.	2.67154	3.15482	0.12541
									nuclear	2	2	11	no stim.	2.73337	3.15403	0.109865
									nuclear	2	2	12	no stim.	2.78428	3.18173	0.0945978
									nuclear	2	2	13	no stim.	2.76572	3.12533	0.104888
									nuclear	2	3	1	no stim.	2.7337	3.16027	0.109127
									nuclear	2	3	2	no stim.	2.68398	3.09693	0.128621
									nuclear	2	3	3	no stim.	2.69469	3.1653	0.118345
									nuclear	2	3	4	no stim.	2.61891	3.11662	0.143821
									nuclear	2	3	5	no stim.	2.67626	3.14687	0.125073
									nuclear	2	3	6	no stim.	2.74101	3.1859	0.10465
									nuclear	2	3	8	no stim.	2.65404	3.13975	0.13167
									nuclear	2	3	9	no stim.	2.73842	3.13257	0.110876
									nuclear	2	3	11	no stim.	2.66673	3.17573	0.124335
									nuclear	3	1	1	no stim.	2.77731	3.245	0.089854
									nuclear	3	1	2	no stim.	2.79125	3.28846	0.0821784
									nuclear	3	1	4	no stim.	2.74734	3.12892	0.109045
									nuclear	3	1	5	no stim.	2.64363	3.18957	0.128767
									nuclear	3	1	6	no stim.	2.70274	3.09618	0.123826
									nuclear	3	1	7	no stim.	2.71028	3.05095	0.126855
									nuclear	3	1	8	no stim.	2.76434	3.08275	0.109664
									nuclear	3	1	13	no stim.	2.77891	3.23511	0.0904726
									nuclear	3	1	14	no stim.	2.77317	3.22494	0.0928727
									nuclear	3	1	17	no stim.	2.80713	3.23555	0.0837283
									nuclear	3	1	18	no stim.	2.77342	3.14969	0.100494
									nuclear	3	1	19	no stim.	2.81024	3.249	0.0816457
									nuclear	3	1	20	no stim.	2.80922	3.21276	0.0855154
									nuclear	3	1	21	no stim.	2.7719	3.26132	0.0894897
									nuclear	3	2	1	no stim.	2.73262	3.21349	0.103826
									nuclear	3	2	2	no stim.	2.7589	3.1816	0.100738
									nuclear	3	2	3	no stim.	2.72216	3.16127	0.111884
									nuclear	3	2	4	no stim.	2.71874	3.20841	0.107751
									nuclear	3	2	7	no stim.	2.70373	3.24549	0.107532
									nuclear	3	2	8	no stim.	2.72298	3.19923	0.107676
									nuclear	3	2	9	no stim.	2.77183	3.21605	0.0940973
									nuclear	3	2	10	no stim.	2.82077	3.1259	0.0914766
									nuclear	3	2	11	no stim.	2.73089	3.1705	0.108745
									nuclear	3	2	12	no stim.	2.84011	3.25144	0.074342
									nuclear	3	2	14	no stim.	2.81169	3.27643	0.0785612
									nuclear	3	3	2	no stim.	2.71462	3.24436	0.10499
									nuclear	3	3	4	no stim.	2.74556	3.19132	0.102976
									nuclear	3	3	5	no stim.	2.68687	3.13815	0.123301
									nuclear	3	3	6	no stim.	2.76038	3.22112	0.096327
									nuclear	3	3	7	no stim.	2.68373	3.2514	0.111828
									nuclear	3	3	9	no stim.	2.8201	3.25534	0.0786827
									nuclear	3	3	13	no stim.	2.72281	3.26424	0.100936
									nuclear	3	3	14	no stim.	2.70334	3.16624	0.116061
									nuclear	3	3	15	no stim.	2.69892	3.16303	0.117521
									nuclear	1	6	1	ionomycin	1.75093	2.36087	14.8081
									nuclear	1	6	2	ionomycin	1.82658	2.34937	14.8081
									nuclear	1	6	3	ionomycin	1.87063	2.31367	14.8081
									nuclear	1	6	4	ionomycin	1.76767	2.21522	14.8081
									nuclear	1	6	5	ionomycin	1.90298	2.42931	14.8081
									nuclear	1	6	6	ionomycin	1.76512	2.20989	14.8081
									nuclear	1	6	7	ionomycin	1.85196	2.29089	14.8081
									nuclear	1	6	8	ionomycin	2.07363	2.66272	0.647409
									nuclear	1	6	9	ionomycin	1.89975	2.42879	14.8081
									nuclear	1	6	10	ionomycin	1.79589	2.29848	14.8081
									nuclear	1	6	11	ionomycin	1.8506	2.35132	14.8081
									nuclear	1	6	12	ionomycin	1.82609	2.30641	14.8081
									nuclear	1	6	13	ionomycin	2.08758	2.62291	0.655908
									nuclear	1	6	15	ionomycin	1.96356	2.45637	2.37267
									nuclear	1	6	16	ionomycin	1.9851	2.43158	2.01725
									nuclear	1	6	17	ionomycin	1.9442	2.46093	3.53581
									nuclear	1	6	18	ionomycin	1.70661	2.28329	14.8081
									nuclear	1	6	19	ionomycin	1.86729	2.2646	14.8081
									nuclear	1	6	20	ionomycin	1.91302	2.28156	14.8081
									nuclear	1	6	21	ionomycin	1.91294	2.25245	14.8081
									nuclear	1	6	22	ionomycin	1.82714	2.26488	14.8081
									nuclear	1	6	23	ionomycin	1.86052	2.39912	14.8081
									nuclear	1	6	24	ionomycin	1.8802	2.25254	14.8081
									nuclear	1	6	25	ionomycin	1.70516	2.19918	14.8081
									nuclear	1	6	26	ionomycin	1.88881	2.3485	14.8081
									nuclear	2	5t	1	ionomycin	1.80633	2.19606	14.8081
									nuclear	2	5t	2	ionomycin	1.83408	2.27458	14.8081
									nuclear	2	5t	3	ionomycin	1.79599	2.28329	14.8081
									nuclear	2	5t	4	ionomycin	1.7838	2.20245	14.8081
									nuclear	2	5t	5	ionomycin	1.83389	2.20599	14.8081
									nuclear	2	5t	6	ionomycin	1.84197	2.28531	14.8081
									nuclear	2	5t	8	ionomycin	1.76265	2.22359	14.8081
									nuclear	2	5t	9	ionomycin	1.78709	2.26712	14.8081
									nuclear	2	5t	11	ionomycin	1.78301	2.18395	14.8081
									nuclear	2	5t	12	ionomycin	1.76689	2.5186	14.8081
									nuclear	3	5	2	ionomycin	1.75688	2.24039	14.8081
									nuclear	3	5	4	ionomycin	1.99723	2.61191	0.960993
									nuclear	3	5	5	ionomycin	1.88688	2.19558	14.8081
									nuclear	3	5	6	ionomycin	1.90425	2.41692	14.8081
									nuclear	3	5	7	ionomycin	1.8347	2.36377	14.8081
									nuclear	3	5	9	ionomycin	1.91235	2.423	14.8081
									nuclear	3	5	13	ionomycin	1.91455	2.45879	14.8081
									nuclear	3	5	16	ionomycin	1.75567	2.40053	14.8081
