# Supplementary material for: A green lifetime biosensor for calcium that remains bright over its full dynamic range
Source: eLife. 2025 Dec 19;14:RP105086. doi: 10.7554/eLife.105086 (PMC12716836; doi:10.7554/eLife.105086)
Supplement: Figure 7—source data 1. [file elife-105086-fig7-data1.xlsx]

## Sheet: figure7
ID	Label	Concentration [µM]	Slice
1	Ca-concentration-movie_230602_v2.tif:0020-0389-0353:1	0.216947	1
2	Ca-concentration-movie_230602_v2.tif:0020-0436-0353:1	0.196077	1
3	Ca-concentration-movie_230602_v2.tif:0020-0312-0237:1	0.174042	1
4	Ca-concentration-movie_230602_v2.tif:0020-0389-0353:2	0.214709	2
5	Ca-concentration-movie_230602_v2.tif:0020-0436-0353:2	0.189743	2
6	Ca-concentration-movie_230602_v2.tif:0020-0312-0237:2	0.17992	2
7	Ca-concentration-movie_230602_v2.tif:0020-0389-0353:3	0.223885	3
8	Ca-concentration-movie_230602_v2.tif:0020-0436-0353:3	0.216999	3
9	Ca-concentration-movie_230602_v2.tif:0020-0312-0237:3	0.192211	3
10	Ca-concentration-movie_230602_v2.tif:0020-0389-0353:4	0.222278	4
11	Ca-concentration-movie_230602_v2.tif:0020-0436-0353:4	0.204963	4
12	Ca-concentration-movie_230602_v2.tif:0020-0312-0237:4	0.177648	4
13	Ca-concentration-movie_230602_v2.tif:0020-0389-0353:5	0.261832	5
14	Ca-concentration-movie_230602_v2.tif:0020-0436-0353:5	0.215919	5
15	Ca-concentration-movie_230602_v2.tif:0020-0312-0237:5	0.181897	5
16	Ca-concentration-movie_230602_v2.tif:0020-0389-0353:6	0.216072	6
17	Ca-concentration-movie_230602_v2.tif:0020-0436-0353:6	0.196629	6
18	Ca-concentration-movie_230602_v2.tif:0020-0312-0237:6	0.185694	6
19	Ca-concentration-movie_230602_v2.tif:0020-0389-0353:7	0.220712	7
20	Ca-concentration-movie_230602_v2.tif:0020-0436-0353:7	0.204322	7
21	Ca-concentration-movie_230602_v2.tif:0020-0312-0237:7	0.172108	7
22	Ca-concentration-movie_230602_v2.tif:0020-0389-0353:8	0.219909	8
23	Ca-concentration-movie_230602_v2.tif:0020-0436-0353:8	0.187189	8
24	Ca-concentration-movie_230602_v2.tif:0020-0312-0237:8	0.177299	8
25	Ca-concentration-movie_230602_v2.tif:0020-0389-0353:9	0.210473	9
26	Ca-concentration-movie_230602_v2.tif:0020-0436-0353:9	0.192418	9
27	Ca-concentration-movie_230602_v2.tif:0020-0312-0237:9	0.176908	9
28	Ca-concentration-movie_230602_v2.tif:0020-0389-0353:10	2.72925	10
29	Ca-concentration-movie_230602_v2.tif:0020-0436-0353:10	2.7207	10
30	Ca-concentration-movie_230602_v2.tif:0020-0312-0237:10	2.68491	10
31	Ca-concentration-movie_230602_v2.tif:0020-0389-0353:11	2.55513	11
32	Ca-concentration-movie_230602_v2.tif:0020-0436-0353:11	2.70132	11
33	Ca-concentration-movie_230602_v2.tif:0020-0312-0237:11	0.749991	11
34	Ca-concentration-movie_230602_v2.tif:0020-0389-0353:12	2.19734	12
35	Ca-concentration-movie_230602_v2.tif:0020-0436-0353:12	2.66064	12
36	Ca-concentration-movie_230602_v2.tif:0020-0312-0237:12	0.345647	12
37	Ca-concentration-movie_230602_v2.tif:0020-0389-0353:13	2.88428	13
38	Ca-concentration-movie_230602_v2.tif:0020-0436-0353:13	2.89568	13
39	Ca-concentration-movie_230602_v2.tif:0020-0312-0237:13	2.79265	13
40	Ca-concentration-movie_230602_v2.tif:0020-0389-0353:14	2.74378	14
41	Ca-concentration-movie_230602_v2.tif:0020-0436-0353:14	2.80192	14
42	Ca-concentration-movie_230602_v2.tif:0020-0312-0237:14	2.76734	14
43	Ca-concentration-movie_230602_v2.tif:0020-0389-0353:15	2.7501	15
44	Ca-concentration-movie_230602_v2.tif:0020-0436-0353:15	2.77712	15
45	Ca-concentration-movie_230602_v2.tif:0020-0312-0237:15	2.463	15
46	Ca-concentration-movie_230602_v2.tif:0020-0389-0353:16	2.65241	16
47	Ca-concentration-movie_230602_v2.tif:0020-0436-0353:16	2.70644	16
48	Ca-concentration-movie_230602_v2.tif:0020-0312-0237:16	0.753747	16
49	Ca-concentration-movie_230602_v2.tif:0020-0389-0353:17	2.27509	17
50	Ca-concentration-movie_230602_v2.tif:0020-0436-0353:17	2.69236	17
51	Ca-concentration-movie_230602_v2.tif:0020-0312-0237:17	0.408915	17
52	Ca-concentration-movie_230602_v2.tif:0020-0389-0353:18	1.6038	18
53	Ca-concentration-movie_230602_v2.tif:0020-0436-0353:18	2.7129	18
54	Ca-concentration-movie_230602_v2.tif:0020-0312-0237:18	0.288916	18
55	Ca-concentration-movie_230602_v2.tif:0020-0389-0353:19	1.03862	19
56	Ca-concentration-movie_230602_v2.tif:0020-0436-0353:19	2.64088	19
57	Ca-concentration-movie_230602_v2.tif:0020-0312-0237:19	0.262371	19
58	Ca-concentration-movie_230602_v2.tif:0020-0389-0353:20	0.648843	20
59	Ca-concentration-movie_230602_v2.tif:0020-0436-0353:20	2.38045	20
60	Ca-concentration-movie_230602_v2.tif:0020-0312-0237:20	0.205877	20
61	Ca-concentration-movie_230602_v2.tif:0020-0389-0353:21	2.70975	21
62	Ca-concentration-movie_230602_v2.tif:0020-0436-0353:21	2.7544	21
63	Ca-concentration-movie_230602_v2.tif:0020-0312-0237:21	2.32418	21
64	Ca-concentration-movie_230602_v2.tif:0020-0389-0353:22	2.3317	22
65	Ca-concentration-movie_230602_v2.tif:0020-0436-0353:22	2.65676	22
66	Ca-concentration-movie_230602_v2.tif:0020-0312-0237:22	0.781113	22
67	Ca-concentration-movie_230602_v2.tif:0020-0389-0353:23	0.999496	23
68	Ca-concentration-movie_230602_v2.tif:0020-0436-0353:23	2.31843	23
69	Ca-concentration-movie_230602_v2.tif:0020-0312-0237:23	0.363722	23
70	Ca-concentration-movie_230602_v2.tif:0020-0389-0353:24	0.561204	24
71	Ca-concentration-movie_230602_v2.tif:0020-0436-0353:24	1.97633	24
72	Ca-concentration-movie_230602_v2.tif:0020-0312-0237:24	0.267895	24
73	Ca-concentration-movie_230602_v2.tif:0020-0389-0353:25	0.377107	25
74	Ca-concentration-movie_230602_v2.tif:0020-0436-0353:25	1.81817	25
75	Ca-concentration-movie_230602_v2.tif:0020-0312-0237:25	0.225508	25
76	Ca-concentration-movie_230602_v2.tif:0020-0389-0353:26	0.330309	26
77	Ca-concentration-movie_230602_v2.tif:0020-0436-0353:26	1.74865	26
78	Ca-concentration-movie_230602_v2.tif:0020-0312-0237:26	0.203114	26
79	Ca-concentration-movie_230602_v2.tif:0020-0389-0353:27	1.28342	27
80	Ca-concentration-movie_230602_v2.tif:0020-0436-0353:27	2.65811	27
81	Ca-concentration-movie_230602_v2.tif:0020-0312-0237:27	0.187728	27
82	Ca-concentration-movie_230602_v2.tif:0020-0389-0353:28	0.611008	28
83	Ca-concentration-movie_230602_v2.tif:0020-0436-0353:28	2.07955	28
84	Ca-concentration-movie_230602_v2.tif:0020-0312-0237:28	0.218416	28
85	Ca-concentration-movie_230602_v2.tif:0020-0389-0353:29	0.390164	29
86	Ca-concentration-movie_230602_v2.tif:0020-0436-0353:29	1.64023	29
87	Ca-concentration-movie_230602_v2.tif:0020-0312-0237:29	0.192037	29
88	Ca-concentration-movie_230602_v2.tif:0020-0389-0353:30	0.29505	30
89	Ca-concentration-movie_230602_v2.tif:0020-0436-0353:30	1.20098	30
90	Ca-concentration-movie_230602_v2.tif:0020-0312-0237:30	0.184642	30
91	Ca-concentration-movie_230602_v2.tif:0020-0389-0353:31	0.257279	31
92	Ca-concentration-movie_230602_v2.tif:0020-0436-0353:31	1.04325	31
93	Ca-concentration-movie_230602_v2.tif:0020-0312-0237:31	0.185706	31
94	Ca-concentration-movie_230602_v2.tif:0020-0389-0353:32	2.71113	32
95	Ca-concentration-movie_230602_v2.tif:0020-0436-0353:32	2.74262	32
96	Ca-concentration-movie_230602_v2.tif:0020-0312-0237:32	0.160009	32
97	Ca-concentration-movie_230602_v2.tif:0020-0389-0353:33	2.76553	33
98	Ca-concentration-movie_230602_v2.tif:0020-0436-0353:33	2.84383	33
99	Ca-concentration-movie_230602_v2.tif:0020-0312-0237:33	2.69147	33
100	Ca-concentration-movie_230602_v2.tif:0020-0389-0353:34	2.70895	34
101	Ca-concentration-movie_230602_v2.tif:0020-0436-0353:34	2.77094	34
102	Ca-concentration-movie_230602_v2.tif:0020-0312-0237:34	2.77309	34
103	Ca-concentration-movie_230602_v2.tif:0020-0389-0353:35	2.71781	35
104	Ca-concentration-movie_230602_v2.tif:0020-0436-0353:35	2.55828	35
105	Ca-concentration-movie_230602_v2.tif:0020-0312-0237:35	2.88166	35
106	Ca-concentration-movie_230602_v2.tif:0020-0389-0353:36	2.54236	36
107	Ca-concentration-movie_230602_v2.tif:0020-0436-0353:36	2.66257	36
108	Ca-concentration-movie_230602_v2.tif:0020-0312-0237:36	2.5923	36
109	Ca-concentration-movie_230602_v2.tif:0020-0389-0353:37	2.56255	37
110	Ca-concentration-movie_230602_v2.tif:0020-0436-0353:37	2.54541	37
111	Ca-concentration-movie_230602_v2.tif:0020-0312-0237:37	2.45338	37
112	Ca-concentration-movie_230602_v2.tif:0020-0389-0353:38	2.55801	38
113	Ca-concentration-movie_230602_v2.tif:0020-0436-0353:38	2.62275	38
114	Ca-concentration-movie_230602_v2.tif:0020-0312-0237:38	2.58348	38
115	Ca-concentration-movie_230602_v2.tif:0020-0389-0353:39	2.55902	39
116	Ca-concentration-movie_230602_v2.tif:0020-0436-0353:39	2.53424	39
117	Ca-concentration-movie_230602_v2.tif:0020-0312-0237:39	2.44835	39
118	Ca-concentration-movie_230602_v2.tif:0020-0389-0353:40	2.64324	40
119	Ca-concentration-movie_230602_v2.tif:0020-0436-0353:40	2.68799	40
120	Ca-concentration-movie_230602_v2.tif:0020-0312-0237:40	2.56708	40
121	Ca-concentration-movie_230602_v2.tif:0020-0389-0353:41	2.49324	41
122	Ca-concentration-movie_230602_v2.tif:0020-0436-0353:41	2.60389	41
123	Ca-concentration-movie_230602_v2.tif:0020-0312-0237:41	2.41308	41
124	Ca-concentration-movie_230602_v2.tif:0020-0389-0353:42	2.67842	42
125	Ca-concentration-movie_230602_v2.tif:0020-0436-0353:42	2.68786	42
126	Ca-concentration-movie_230602_v2.tif:0020-0312-0237:42	2.56758	42
127	Ca-concentration-movie_230602_v2.tif:0020-0389-0353:43	2.55371	43
128	Ca-concentration-movie_230602_v2.tif:0020-0436-0353:43	2.47513	43
129	Ca-concentration-movie_230602_v2.tif:0020-0312-0237:43	2.49961	43
130	Ca-concentration-movie_230602_v2.tif:0020-0389-0353:44	2.49373	44
131	Ca-concentration-movie_230602_v2.tif:0020-0436-0353:44	NaN	44
132	Ca-concentration-movie_230602_v2.tif:0020-0312-0237:44	2.48706	44
