# Supplementary material for: A green lifetime biosensor for calcium that remains bright over its full dynamic range
Source: eLife. 2025 Dec 19;14:RP105086. doi: 10.7554/eLife.105086 (PMC12716836; doi:10.7554/eLife.105086)
Supplement: Figure 9—source data 1. [file elife-105086-fig9-data1.xlsx]

## Sheet: jGCaMP7f
Fly 0 time (s)	Fly 0 dF/F	Fly 1 time (s)	Fly 1 dF/F	Fly 2 time (s)	Fly 2 dF/F	Fly 3 time (s)	Fly 3 dF/F
0	-0.498914	0	-0.511019	0	-0.497653	0	-0.493234
0.0976125	-0.442121	0.097626	-0.455816	0.0976127	-0.438254	0.0976259	-0.435965
0.195225	-0.385452	0.195252	-0.400992	0.195238	-0.379068	0.195239	-0.37902
0.29285	-0.328693	0.292865	-0.346655	0.292851	-0.320223	0.292864	-0.322576
0.390462	-0.271708	0.39049	-0.292671	0.390463	-0.261636	0.39049	-0.266456
0.488074	-0.214458	0.488116	-0.238603	0.488076	-0.203432	0.488115	-0.210598
0.5857	-0.15672	0.585742	-0.18466	0.585701	-0.145672	0.585741	-0.154934
0.683312	-0.0986149	0.683368	-0.130679	0.683314	-0.0882693	0.683366	-0.0995187
0.780925	-0.0401331	0.78098	-0.0763648	0.780927	-0.0312238	0.780979	-0.0441893
0.878549	0.0187276	0.878606	-0.0219202	0.87854	0.0255806	0.878605	0.010946
0.976162	0.0777158	0.976232	0.0326033	0.976164	0.0822206	0.976231	0.0659045
1.07377	0.105976	1.07386	0.0574396	1.07378	0.109934	1.07386	0.0901535
1.1714	0.128579	1.17148	0.0763937	1.17139	0.131668	1.17148	0.108064
1.26901	0.145692	1.2691	0.0894672	1.269	0.147422	1.26911	0.119977
1.36662	0.157851	1.36672	0.0966644	1.36663	0.157084	1.36673	0.126072
1.46425	0.16458	1.46435	0.0979085	1.46424	0.160908	1.46435	0.12643
1.56186	0.165829	1.56197	0.0939851	1.56185	0.158649	1.56197	0.121283
1.65947	0.168099	1.65959	0.0908222	1.65948	0.156016	1.6596	0.116766
1.75709	0.17128	1.75721	0.088247	1.75709	0.15332	1.75722	0.113018
1.85471	0.175413	1.85484	0.0859209	1.8547	0.150574	1.85485	0.109764
1.95232	0.180145	1.95246	0.0841669	1.95232	0.147724	1.95247	0.106798
2.04994	0.18513	2.05009	0.0830976	2.04994	0.145271	2.05009	0.104149
2.14756	0.188905	2.1477	0.0827196	2.14755	0.142864	2.14771	0.101741
2.24517	0.191036	2.24533	0.0831926	2.24517	0.140772	2.24534	0.0997842
2.34279	0.19124	2.34295	0.0843466	2.34278	0.138916	2.34296	0.09783
2.44041	0.189901	2.44058	0.0853236	2.44041	0.137367	2.44059	0.0959486
2.53802	0.186747	2.53819	0.086093	2.53802	0.136603	2.53821	0.0941408
2.63564	0.182071	2.63582	0.0867322	2.63563	0.136289	2.63583	0.0924234
2.73326	0.17581	2.73344	0.0869268	2.73324	0.136377	2.73345	0.090734
2.83087	0.168274	2.83107	0.0869403	2.83087	0.136949	2.83108	0.0891282
2.92849	0.159749	2.92868	0.0868141	2.92848	0.138021	2.9287	0.0876345
3.0261	0.150465	3.02631	0.086488	3.02609	0.139428	3.02633	0.0860799
3.12372	0.1419	3.12393	0.0861795	3.12372	0.140938	3.12394	0.0845583
3.22134	0.134041	3.22156	0.0859525	3.22133	0.142329	3.22157	0.082841
3.31895	0.126757	3.31918	0.0858849	3.31894	0.14378	3.31919	0.0811646
3.41657	0.120187	3.4168	0.0861236	3.41656	0.144996	3.41682	0.0793817
3.51419	0.114302	3.51442	0.0863714	3.51418	0.146237	3.51444	0.0773578
3.6118	0.108801	3.61205	0.0866664	3.61179	0.14714	3.61207	0.0751086
3.70942	0.103677	3.70967	0.0872443	3.70941	0.147821	3.70968	0.072533
3.80704	0.0984883	3.80729	0.0880623	3.80702	0.148491	3.80731	0.0698956
3.90465	0.0934856	3.90491	0.0885596	3.90464	0.149482	3.90494	0.0674054
4.00226	0.0884561	4.00254	0.0887141	4.00226	0.150336	4.00256	0.0651684
4.09989	0.0847737	4.10016	0.088633	4.09987	0.151339	4.10019	0.0633944
4.1975	0.0829354	4.19778	0.0881565	4.19748	0.152411	4.1978	0.0618521
4.29511	0.0824324	4.2954	0.0871457	4.29511	0.153669	4.29542	0.0607871
4.39274	0.0835164	4.39303	0.0860592	4.39272	0.155206	4.39305	0.0601821
4.49035	0.0858199	4.49065	0.0850462	4.49033	0.15637	4.49068	0.0601174
4.58796	0.0892404	4.58827	0.0839818	4.58795	0.157687	4.5883	0.0606569
4.68559	0.093778	4.68589	0.0827012	4.68557	0.158965	4.68591	0.0616931
4.7832	0.0994055	4.78352	0.0812999	4.78318	0.16018	4.78354	0.063197
4.88081	0.105701	4.88114	0.0799774	4.8808	0.161139	4.88117	0.0650729
4.97842	0.112863	4.97876	0.0787152	4.97842	0.162059	4.97879	0.0673268
5.07605	0.119078	5.07638	0.07745	5.07603	0.162988	5.07642	0.0700144
5.17366	0.124137	5.17401	0.0761621	5.17365	0.164409	5.17404	0.0731579
5.27127	0.128228	5.27163	0.0749397	5.27126	0.166037	5.27165	0.0762759
5.3689	0.131183	5.36925	0.0737014	5.36889	0.167767	5.36928	0.0795927
5.46651	0.133495	5.46687	0.0719825	5.4665	0.169566	5.46691	0.0830688
5.56412	0.135287	5.5645	0.0701078	5.56411	0.171423	5.56453	0.0868295
5.66175	0.136786	5.66212	0.0681664	5.66172	0.173586	5.66216	0.0907932
5.75936	0.137747	5.75974	0.0661011	5.75935	0.175882	5.75977	0.0948097
5.85697	0.138255	5.85736	0.0641453	5.85696	0.178003	5.8574	0.0986955
5.95459	0.138147	5.95499	0.0623156	5.95457	0.180202	5.95502	0.102279
6.05221	0.137668	6.05261	0.0605832	6.05219	0.182409	6.05265	0.105353
6.14982	0.13657	6.15023	0.0589553	6.14981	0.184296	6.15027	0.108218
6.24744	0.135175	6.24785	0.0576572	6.24742	0.185799	6.24789	0.110983
6.34506	0.133328	6.34548	0.0566063	6.34504	0.187132	6.34551	0.113527
6.44267	0.131141	6.4431	0.0560536	6.44265	0.188325	6.44314	0.115719
6.54029	0.12867	6.54072	0.0558356	6.54027	0.189251	6.54076	0.117459
6.6379	0.125572	6.63834	0.0561626	6.63789	0.190045	6.63838	0.118926
6.73552	0.121949	6.73597	0.0567135	6.7355	0.190653	6.736	0.120265
6.83314	0.118213	6.83359	0.0572554	6.83311	0.191414	6.83363	0.121588
6.93075	0.113963	6.93121	0.0580013	6.93074	0.19211	6.93125	0.122882
7.02837	0.109657	7.02883	0.0587063	7.02835	0.192812	7.02888	0.124095
7.12599	0.105359	7.12646	0.0594207	7.12596	0.193026	7.12649	0.124997
7.2236	0.101324	7.22407	0.0598143	7.22359	0.193005	7.22412	0.126049
7.32121	0.0974023	7.3217	0.0601666	7.3212	0.193065	7.32174	0.127148
7.41884	0.0934283	7.41932	0.0607202	7.41881	0.193205	7.41937	0.128331
7.51645	0.0890348	7.51695	0.0612639	7.51643	0.193385	7.51699	0.129398
7.61406	0.0844031	7.61456	0.0616801	7.61405	0.193134	7.61461	0.130558
7.71169	0.0801163	7.71219	0.0620048	7.71166	0.192681	7.71223	0.131714
7.8093	0.0757237	7.80981	0.0624309	7.80928	0.192073	7.80986	0.132618
7.90691	0.0715945	7.90744	0.062649	7.90689	0.19134	7.90748	0.133751
8.00452	0.0677501	8.00505	0.0627035	8.00452	0.190554	8.0051	0.134999
8.10215	0.0641195	8.10268	0.0627796	8.10213	0.190181	8.10272	0.136352
8.19976	0.0606379	8.2003	0.062699	8.19974	0.189984	8.20035	0.137519
8.29737	0.0573226	8.29792	0.0625557	8.29735	0.189632	8.29797	0.138544
8.395	0.0542998	8.39554	0.0622021	8.39498	0.189515	8.3956	0.139176
8.49261	0.0519468	8.49317	0.0615584	8.49259	0.189536	8.49321	0.139721
8.59022	0.0502346	8.59079	0.0606184	8.5902	0.189913	8.59084	0.139815
8.68783	0.0489842	8.68841	0.0595783	8.68782	0.190404	8.68846	0.139483
8.78546	0.0479239	8.78603	0.0584373	8.78544	0.190896	8.78609	0.138774
8.88307	0.0472996	8.88366	0.0573459	8.88305	0.191531	8.8837	0.137452
8.98068	0.0465318	8.98128	0.056691	8.98067	0.191998	8.98133	0.135803
9.07831	0.0459216	9.07889	0.0562428	9.07828	0.192565	9.07895	0.133767
9.17592	0.0448904	9.17652	0.0563892	9.17591	0.1933	9.17658	0.13132
9.27353	0.043817	9.27415	0.0565387	9.27352	0.194074	9.2742	0.128397
9.37115	0.0424802	9.37176	0.0567288	9.37113	0.194728	9.37181	0.125266
9.46877	0.0410183	9.46938	0.0572995	9.46874	0.195326	9.46944	0.121915
9.56638	0.0393478	9.56701	0.0581423	9.56637	0.195888	9.56707	0.11847
9.664	0.0373087	9.66464	0.0593337	9.66398	0.196631	9.66469	0.115049
9.76162	0.0354005	9.76225	0.0606639	9.76159	0.197499	9.7623	0.111916
9.85923	0.0334302	9.85987	0.0622147	9.85921	0.198296	9.85993	0.108531
9.95685	0.0315555	9.9575	0.0636719	9.95683	0.19912	9.95756	0.10487
10.0545	0.0297934	10.0551	0.0649057	10.0544	0.199582	10.0552	0.101105
10.1521	0.0287035	10.1527	0.0660493	10.1521	0.199893	10.1528	0.0972931
10.2497	0.0275219	10.2504	0.0672304	10.2497	0.199989	10.2504	0.0935159
10.3473	0.0266202	10.348	0.0684668	10.3473	0.199687	10.348	0.0899649
10.4449	0.0255764	10.4456	0.0697209	10.4449	0.199123	10.4457	0.0863577
10.5425	0.0247363	10.5432	0.0710163	10.5425	0.198306	10.5433	0.0827615
10.6402	0.0237391	10.6409	0.0723294	10.6401	0.197198	10.6409	0.0792249
10.7378	0.0226259	10.7385	0.0737226	10.7378	0.195677	10.7385	0.0755931
10.8354	0.0212493	10.8361	0.0748946	10.8354	0.193666	10.8362	0.0722747
10.933	0.0197699	10.9337	0.0757959	10.933	0.191433	10.9338	0.0692335
11.0306	0.0180441	11.0313	0.076513	11.0306	0.188948	11.0314	0.0665434
11.1282	0.0158784	11.129	0.0767914	11.1282	0.186265	11.129	0.0639166
11.2259	0.0138742	11.2266	0.0768585	11.2258	0.183496	11.2267	0.0613777
11.3235	0.011709	11.3242	0.0768342	11.3234	0.180843	11.3243	0.059033
11.4211	0.00972563	11.4218	0.0765401	11.4211	0.178467	11.4219	0.0571034
11.5187	0.00735958	11.5194	0.0759464	11.5187	0.176363	11.5195	0.0555154
11.6163	0.00534131	11.6171	0.0750081	11.6163	0.17426	11.6171	0.0540855
11.7139	0.00324592	11.7147	0.0737496	11.7139	0.172227	11.7148	0.0530569
11.8115	0.0015245	11.8123	0.0723424	11.8115	0.170472	11.8124	0.0526916
11.9092	-6.93614e-05	11.9099	0.071069	11.9091	0.16877	11.91	0.0531021
12.0068	-0.00109911	12.0076	0.0700069	12.0068	0.16728	12.0076	0.0542724
12.1044	-0.00192126	12.1052	0.0691673	12.1044	0.16584	12.1053	0.056314
12.202	-0.00240728	12.2028	0.0685655	12.202	0.164603	12.2029	0.0591945
12.2996	-0.00252902	12.3004	0.0680763	12.2996	0.163514	12.3005	0.0628816
12.3972	-0.00257074	12.398	0.0681268	12.3972	0.162356	12.3981	0.0673445
12.4949	-0.00232239	12.4957	0.069002	12.4948	0.160928	12.4957	0.0724653
12.5925	-0.00190914	12.5933	0.070501	12.5925	0.159631	12.5934	0.0783066
12.6901	-0.00105691	12.6909	0.0725339	12.6901	0.158417	12.691	0.0847663
12.7877	-0.000337106	12.7885	0.0752027	12.7877	0.157196	12.7886	0.091758
12.8853	0.000888602	12.8862	0.0784157	12.8853	0.156108	12.8862	0.0990519
12.9829	0.0018907	12.9838	0.0822719	12.9829	0.15534	12.9838	0.106688
13.0806	0.00327308	13.0814	0.0866673	13.0805	0.154583	13.0815	0.114551
13.1782	0.00456815	13.179	0.0915275	13.1781	0.153662	13.1791	0.122724
13.2758	0.00617607	13.2766	0.0965157	13.2758	0.152475	13.2767	0.130682
13.3734	0.00790138	13.3743	0.101415	13.3734	0.150928	13.3743	0.138223
13.471	0.0100875	13.4719	0.106025	13.471	0.149307	13.472	0.145338
13.5686	0.0124385	13.5695	0.110387	13.5686	0.147552	13.5696	0.152065
13.6663	0.0148618	13.6671	0.114672	13.6662	0.14573	13.6672	0.157977
13.7639	0.0172574	13.7647	0.118609	13.7639	0.143944	13.7648	0.162841
13.8615	0.0193164	13.8624	0.121941	13.8615	0.142294	13.8625	0.166895
13.9591	0.0211513	13.96	0.124807	13.9591	0.140596	13.9601	0.169614
14.0567	0.0224178	14.0576	0.127236	14.0567	0.139201	14.0577	0.171172
14.1543	0.0234538	14.1552	0.129156	14.1543	0.137984	14.1553	0.171502
14.2519	0.0239952	14.2529	0.130509	14.2519	0.137123	14.2529	0.170606
14.3496	0.0243769	14.3505	0.131091	14.3495	0.136624	14.3506	0.16892
14.4472	0.0241557	14.4481	0.130753	14.4472	0.136764	14.4482	0.16654
14.5448	0.0234403	14.5457	0.129665	14.5448	0.137043	14.5458	0.16348
14.6424	0.0224687	14.6433	0.127802	14.6424	0.137516	14.6434	0.160107
14.74	0.0216073	14.741	0.125194	14.74	0.138298	14.7411	0.156421
14.8376	0.0203986	14.8386	0.121972	14.8376	0.139228	14.8387	0.152245
14.9353	0.0194168	14.9362	0.117949	14.9352	0.140085	14.9363	0.147984
15.0329	0.0185277	15.0338	0.113288	15.0329	0.140974	15.0339	0.143719
15.1305	0.017788	15.1314	0.108271	15.1305	0.142066	15.1315	0.139391
15.2281	0.0168296	15.2291	0.103167	15.2281	0.143241	15.2292	0.135308
15.3257	0.016153	15.3267	0.0982814	15.3257	0.144506	15.3268	0.131331
15.4233	0.0157271	15.4243	0.0938608	15.4233	0.145436	15.4244	0.127596
15.521	0.0151154	15.5219	0.0898267	15.5209	0.146426	15.522	0.12389
15.6186	0.0143447	15.6196	0.0861786	15.6185	0.14743	15.6196	0.120288
15.7162	0.0134978	15.7172	0.083253	15.7162	0.148357	15.7173	0.11697
15.8138	0.0131738	15.8148	0.081144	15.8138	0.148975	15.8149	0.113698
15.9114	0.0125985	15.9124	0.0793747	15.9114	0.149523	15.9125	0.11062
16.009	0.0123056	16.01	0.0779878	16.009	0.149866	16.0101	0.10793
16.1066	0.0119947	16.1077	0.0767955	16.1066	0.149955	16.1078	0.10554
16.2043	0.011757	16.2053	0.0759067	16.2042	0.149896	16.2054	0.103528
16.3019	0.0110905	16.3029	0.0752302	16.3019	0.149613	16.303	0.101631
16.3995	0.0106181	16.4005	0.0745581	16.3995	0.148961	16.4006	0.100034
16.4971	0.0106331	16.4982	0.0739027	16.4971	0.148141	16.4983	0.098668
16.5947	0.0109877	16.5958	0.0733451	16.5947	0.147133	16.5959	0.0973574
16.6923	0.0117939	16.6934	0.0728883	16.6923	0.14598	16.6935	0.096155
16.79	0.012502	16.791	0.0724118	16.7899	0.144711	16.7911	0.0951716
16.8876	0.0135963	16.8886	0.0722397	16.8876	0.143488	16.8887	0.0940715
16.9852	0.0147623	16.9863	0.0722104	16.9852	0.142255	16.9864	0.0928052
17.0828	0.0157121	17.0839	0.0719906	17.0828	0.140994	17.084	0.0915656
17.1804	0.016799	17.1815	0.0717235	17.1804	0.139607	17.1816	0.0902304
17.278	0.0180635	17.2791	0.071224	17.278	0.13838	17.2792	0.088924
17.3757	0.0190904	17.3767	0.0706618	17.3756	0.137509	17.3768	0.0874147
17.4733	0.0200644	17.4744	0.070001	17.4732	0.136597	17.4745	0.0860089
17.5709	0.0207289	17.572	0.0689862	17.5709	0.135777	17.5721	0.0848298
17.6685	0.0212566	17.6696	0.0673984	17.6685	0.134797	17.6697	0.0836413
17.7661	0.0216844	17.7672	0.065371	17.7661	0.133966	17.7673	0.0825057
17.8637	0.021861	17.8648	0.0632134	17.8637	0.13318	17.865	0.0816314
17.9613	0.021553	17.9625	0.0609503	17.9613	0.13235	17.9626	0.0809139
18.059	0.0210873	18.0601	0.0589008	18.0589	0.131692	18.0602	0.08013
18.1566	0.0205838	18.1577	0.0568784	18.1566	0.13096	18.1578	0.0793754
18.2542	0.020303	18.2553	0.0550523	18.2542	0.130142	18.2555	0.0785061
18.3518	0.0197471	18.353	0.0536127	18.3518	0.129177	18.3531	0.0774403
18.4494	0.0186897	18.4506	0.0525857	18.4494	0.128203	18.4507	0.0758954
18.547	0.017464	18.5482	0.0520848	18.547	0.127477	18.5483	0.0740948
18.6447	0.0156543	18.6458	0.052028	18.6446	0.126972	18.6459	0.0719106
18.7423	0.0138587	18.7434	0.052365	18.7422	0.126694	18.7436	0.0697422
18.8399	0.0116294	18.8411	0.0527992	18.8399	0.1264	18.8412	0.0678861
18.9375	0.00905142	18.9387	0.0534573	18.9375	0.126316	18.9388	0.0661459
19.0351	0.00664851	19.0363	0.0545784	19.0351	0.126438	19.0364	0.0644556
19.1327	0.00427373	19.1339	0.0560095	19.1327	0.127041	19.134	0.0628846
19.2303	0.00136346	19.2315	0.0576702	19.2303	0.127824	19.2317	0.0616424
19.328	-0.00135764	19.3292	0.0591828	19.3279	0.128847	19.3293	0.0608011
19.4256	-0.00348068	19.4268	0.0607513	19.4256	0.130278	19.4269	0.0605406
19.5232	-0.00497316	19.5244	0.0623985	19.5232	0.13175	19.5245	0.0603423
19.6208	-0.00640113	19.622	0.0641282	19.6208	0.133349	19.6221	0.0604239
19.7184	-0.008238	19.7197	0.0660403	19.7184	0.134894	19.7198	0.0607127
19.816	-0.00940696	19.8173	0.0682015	19.816	0.136611	19.8174	0.0607943
19.9137	-0.0100002	19.9149	0.0705807	19.9136	0.138409	19.915	0.060681
20.0113	-0.0101821	20.0125	0.0729059	20.0113	0.140192	20.0126	0.0606827
20.1089	-0.0102762	20.1101	0.0753856	20.1089	0.142097	20.1103	0.0606776
20.2065	-0.00976201	20.2078	0.0779355	20.2065	0.144255	20.2079	0.0605816
20.3041	-0.00878561	20.3054	0.080449	20.3041	0.146674	20.3055	0.0603178
20.4017	-0.00726112	20.403	0.0828079	20.4017	0.149354	20.4031	0.0600574
20.4994	-0.00582151	20.5006	0.0848876	20.4993	0.152115	20.5007	0.0595652
20.597	-0.00387939	20.5982	0.0867916	20.597	0.15496	20.5984	0.0589019
20.6946	-0.00150073	20.6959	0.0884362	20.6946	0.15799	20.696	0.057746
20.7922	0.00104915	20.7935	0.0899181	20.7922	0.161093	20.7936	0.0558561
20.8898	0.00383282	20.8911	0.0911699	20.8898	0.164103	20.8912	0.0534839
20.9874	0.00682749	20.9887	0.0922482	20.9874	0.166993	20.9889	0.0506186
21.085	0.00984641	21.0864	0.093078	21.085	0.169638	21.0865	0.0473797
21.1827	0.0127203	21.184	0.0937158	21.1827	0.171952	21.1841	0.0439145
21.2803	0.0154186	21.2816	0.0945054	21.2803	0.17405	21.2817	0.0401175
21.3779	0.0175746	21.3792	0.0951342	21.3779	0.175745	21.3793	0.0358126
21.4755	0.0195905	21.4768	0.0957396	21.4755	0.177408	21.477	0.0317446
21.5731	0.021618	21.5745	0.0964711	21.5731	0.17902	21.5746	0.0277374
21.6707	0.0240946	21.6721	0.0970463	21.6707	0.180644	21.6722	0.0238604
21.7684	0.0261808	21.7697	0.0974071	21.7683	0.182168	21.7698	0.0205327
21.866	0.0284251	21.8673	0.0977085	21.866	0.183857	21.8674	0.017456
21.9636	0.0305893	21.9649	0.0977517	21.9636	0.185489	21.9651	0.0146166
22.0612	0.0330398	22.0626	0.0975188	22.0612	0.187004	22.0627	0.0118571
22.1588	0.0349979	22.1602	0.0971598	22.1588	0.18867	22.1603	0.00900157
22.2564	0.0367882	22.2578	0.0966378	22.2564	0.190479	22.2579	0.00652868
22.354	0.0383302	22.3554	0.0962423	22.354	0.1923	22.3556	0.00441094
22.4517	0.039811	22.453	0.0959734	22.4517	0.19395	22.4532	0.00256294
22.5493	0.0410736	22.5507	0.0956797	22.5493	0.195568	22.5508	0.00109333
22.6469	0.0420058	22.6483	0.0955477	22.6469	0.196778	22.6484	0
22.7445	0.0431258	22.7459	0.0955982	22.7445	0.197938	22.746	-0.0008312
22.8421	0.0442962	22.8435	0.0956558	22.8421	0.199078	22.8437	-0.00131487
22.9397	0.0451732	22.9412	0.0958653	22.9397	0.200091	22.9413	-0.00134489
23.0374	0.0460492	23.0388	0.0961072	23.0373	0.20104	23.0389	-0.0011521
23.135	0.0473893	23.1364	0.0962473	23.135	0.202062	23.1365	-0.000758481
23.2326	0.0489517	23.234	0.0962378	23.2326	0.202737	23.2342	-0.000314977
23.3302	0.0505155	23.3316	0.0962202	23.3302	0.203288	23.3318	0.000243526
23.4278	0.0517814	23.4293	0.0960509	23.4278	0.203703	23.4294	0.000688298
23.5254	0.0529446	23.5269	0.0956184	23.5254	0.203977	23.527	0.00121594
23.623	0.0536454	23.6245	0.0950955	23.623	0.204324	23.6246	0.00181207
23.7207	0.0539995	23.7221	0.0944216	23.7207	0.204594	23.7223	0.0022877
23.8183	0.0538836	23.8197	0.0933216	23.8183	0.204461	23.8199	0.00291427
23.9159	0.0534699	23.9174	0.0920032	23.9159	0.204441	23.9175	0.00354676
24.0135	0.0523611	24.015	0.0906888	24.0135	0.204412	24.0151	0.00443927
24.1111	0.0510248	24.1126	0.0892862	24.1111	0.203982	24.1127	0.00565394
24.2087	0.0492286	24.2102	0.0875979	24.2087	0.203546	24.2104	0.00694978
24.3064	0.0472865	24.3078	0.0852669	24.3063	0.202982	24.308	0.00812978
24.404	0.0455617	24.4055	0.0825395	24.404	0.202337	24.4056	0.00922099
24.5016	0.044157	24.5031	0.0794679	24.5016	0.201751	24.5032	0.00999004
24.5992	0.0428852	24.6007	0.0759869	24.5992	0.201213	24.6008	0.0105549
24.6968	0.0417817	24.6983	0.0720726	24.6968	0.200603	24.6985	0.0112339
24.7944	0.0407219	24.796	0.0680677	24.7944	0.200057	24.7961	0.0118402
24.8921	0.0402626	24.8936	0.0637926	24.892	0.199598	24.8937	0.0121826
24.9897	0.0398901	24.9912	0.0591941	24.9897	0.199281	24.9913	0.0122794
25.0873	0.0394768	25.0888	0.0544356	25.0873	0.199036	25.089	0.0118926
25.1849	0.038788	25.1864	0.0496745	25.1849	0.198927	25.1866	0.011266
25.2825	0.0381104	25.2841	0.0449832	25.2825	0.199114	25.2842	0.0104378
25.3801	0.0376894	25.3817	0.0402626	25.3801	0.199511	25.3818	0.00941294
25.4777	0.0373494	25.4793	0.0356865	25.4777	0.199985	25.4794	0.00820969
25.5754	0.0372684	25.5769	0.0310763	25.5754	0.200529	25.5771	0.00697388
25.673	0.0372902	25.6745	0.0265147	25.673	0.201277	25.6747	0.00568099
25.7706	0.0372524	25.7722	0.0220657	25.7706	0.202173	25.7723	0.00412936
25.8682	0.0371112	25.8698	0.0176523	25.8682	0.202916	25.8699	0.00263819
25.9658	0.0375657	25.9674	0.0132866	25.9658	0.203447	25.9676	0.00123538
26.0634	0.0383404	26.065	0.00882456	26.0634	0.203889	26.0652	0.000212239
26.1611	0.0399138	26.1626	0.00427828	26.161	0.20394	26.1628	-0.000768205
26.2587	0.0418889	26.2603	5.40528e-05	26.2587	0.203842	26.2604	-0.00148398
26.3563	0.0437074	26.3579	-0.00408188	26.3563	0.203418	26.358	-0.00184335
26.4539	0.0450505	26.4555	-0.00816377	26.4539	0.202501	26.4557	-0.00179516
26.5515	0.0466278	26.5531	-0.0120421	26.5515	0.201381	26.5533	-0.001577
26.6491	0.0480505	26.6507	-0.0157654	26.6491	0.199981	26.6509	-0.00131106
26.7467	0.0492606	26.7484	-0.0194932	26.7467	0.198162	26.7485	-0.000758481
26.8443	0.0495556	26.846	-0.0231359	26.8444	0.196081	26.8461	-8.87854e-05
26.942	0.0498708	26.9436	-0.0266836	26.942	0.193978	26.9438	0.000727194
27.0396	0.0501953	27.0412	-0.0298867	27.0396	0.191861	27.0414	0.00182856
27.1372	0.0503336	27.1388	-0.0328244	27.1372	0.18995	27.139	0.00319754
27.2348	0.0504534	27.2365	-0.0357757	27.2348	0.187781	27.2366	0.00466165
27.3324	0.050968	27.3341	-0.0385009	27.3324	0.185613	27.3342	0.00620145
27.43	0.0516539	27.4317	-0.0410842	27.4301	0.183552	27.4319	0.00760975
27.5277	0.0520041	27.5293	-0.043399	27.5277	0.181252	27.5295	0.00882696
27.6253	0.0524828	27.6269	-0.0453336	27.6253	0.178768	27.6271	0.00980444
27.7229	0.0535062	27.7246	-0.0469421	27.7229	0.176444	27.7247	0.0104534
27.8205	0.0550986	27.8222	-0.0482907	27.8205	0.174153	27.8223	0.0107591
27.9181	0.056125	27.9198	-0.0494993	27.9181	0.171894	27.92	0.0105583
28.0157	0.0570476	28.0174	-0.050492	28.0158	0.169685	28.0176	0.00969029
28.1133	0.0577494	28.115	-0.0511605	28.1134	0.167495	28.1152	0.00837415
28.211	0.0581331	28.2127	-0.0517425	28.211	0.165307	28.2128	0.00676291
28.3086	0.0577058	28.3103	-0.0521114	28.3086	0.163384	28.3105	0.00499988
28.4062	0.0572367	28.4079	-0.0522492	28.4062	0.161583	28.4081	0.00323686
28.5038	0.0566173	28.5055	-0.0523028	28.5038	0.160112	28.5057	0.00147511
28.6014	0.0564155	28.6031	-0.0525501	28.6014	0.158856	28.6033	-0.000120072
28.699	0.0561735	28.7008	-0.0528591	28.6991	0.157878	28.7009	-0.00159264
28.7967	0.0562511	28.7984	-0.0531676	28.7967	0.157214	28.7986	-0.00278786
28.8943	0.0562991	28.896	-0.0533672	28.8943	0.156694	28.8962	-0.00357551
28.9919	0.0564616	28.9936	-0.0537793	28.9919	0.156334	28.9938	-0.00406637
29.0895	0.0568691	29.0913	-0.0544077	29.0895	0.156185	29.0914	-0.00427776
29.1871	0.0574501	29.1889	-0.0551419	29.1871	0.156374	29.189	-0.00407525
29.2847	0.0578498	29.2865	-0.0560982	29.2848	0.156563	29.2867	-0.0036068
29.3823	0.0581913	29.3841	-0.0571842	29.3824	0.156845	29.3843	-0.00270119
29.48	0.0588757	29.4817	-0.0584662	29.48	0.157265	29.4819	-0.0013656
29.5776	0.0593302	29.5794	-0.0600004	29.5776	0.157754	29.5795	0.000392347
29.6752	0.0595809	29.677	-0.0617598	29.6752	0.158335	29.6771	0.0026365
29.7728	0.0594965	29.7746	-0.0636674	29.7728	0.159007	29.7748	0.00540153
29.8704	0.0595538	29.8722	-0.0657155	29.8704	0.159821	29.8724	0.00861598
29.968	0.0595625	29.9698	-0.0680277	29.9681	0.160795	29.97	0.0122993
30.0657	0.059156	30.0675	-0.0704699	30.0657	0.161745	30.0676	0.0164667
30.1633	0.0587549	30.1651	-0.0728284	30.1633	0.162791	30.1653	0.0209597
30.2609	0.0590445	30.2627	-0.0752441	30.2609	0.163939	30.2629	0.0254759
30.3585	0.0593913	30.3603	-0.0777427	30.3585	0.165318	30.3605	0.0297634
30.4561	0.059498	30.4579	-0.0803355	30.4561	0.166727	30.4581	0.0341464
30.5537	0.0586875	30.5556	-0.0826187	30.5538	0.168235	30.5557	0.0383768
30.6513	0.0578755	30.6532	-0.0845926	30.6514	0.169715	30.6534	0.0425578
30.749	0.0570141	30.7508	-0.0865128	30.749	0.170865	30.751	0.046674
30.8466	0.0562176	30.8484	-0.0884686	30.8466	0.171793	30.8486	0.050499
30.9442	0.055054	30.946	-0.0901906	30.9442	0.172461	30.9462	0.0539494
31.0418	0.0540995	31.0437	-0.0917852	31.0418	0.173074	31.0438	0.0569414
31.1394	0.0530474	31.1413	-0.0932347	31.1395	0.173415	31.1415	0.059591
31.237	0.0522117	31.2389	-0.094386	31.2371	0.173867	31.2391	0.0619675
31.3347	0.0518309	31.3365	-0.0953811	31.3347	0.17431	31.3367	0.06421
31.4323	0.0514133	31.4341	-0.0960468	31.4323	0.174826	31.4343	0.0659451
31.5299	0.0515704	31.5318	-0.0966887	31.5299	0.175489	31.532	0.0674147
31.6275	0.0514967	31.6294	-0.0971711	31.6275	0.176108	31.6296	0.0686987
31.7251	0.0515321	31.727	-0.0973923	31.7251	0.176963	31.7272	0.0692606
31.8227	0.0519866	31.8246	-0.0974116	31.8228	0.177912	31.8248	0.0693536
31.9203	0.052654	31.9222	-0.0971351	31.9204	0.17897	31.9224	0.0693853
32.018	0.0536852	32.0199	-0.0965716	32.018	0.180182	32.0201	0.0692471
32.1156	0.0550157	32.1175	-0.0960027	32.1156	0.181427	32.1177	0.0686087
32.2132	0.0562715	32.2151	-0.095436	32.2132	0.182309	32.2153	0.0676308
32.3108	0.0573929	32.3127	-0.0948995	32.3108	0.18285	32.3129	0.06643
32.4084	0.0583902	32.4103	-0.0942996	32.4085	0.183142	32.4105	0.0649934
32.506	0.0595887	32.508	-0.093541	32.5061	0.183268	32.5082	0.0633902
32.6037	0.060813	32.6056	-0.0928586	32.6037	0.183145	32.6058	0.0612551
32.7013	0.0625611	32.7032	-0.0921735	32.7013	0.182962	32.7034	0.0590093
32.7989	0.0640162	32.8008	-0.0912393	32.7989	0.182343	32.801	0.0566493
32.8965	0.0656299	32.8984	-0.0903141	32.8965	0.181489	32.8986	0.0541417
32.9941	0.0667664	32.9961	-0.0894366	32.9941	0.180067	32.9963	0.0517927
33.0917	0.0674692	33.0937	-0.0885114	33.0918	0.178583	33.0939	0.0494966
33.1893	0.0676686	33.1913	-0.0875875	33.1894	0.176917	33.1915	0.0473408
33.287	0.0669459	33.2889	-0.0865015	33.287	0.175138	33.2891	0.045193
33.3846	0.0661897	33.3865	-0.0855128	33.3846	0.173167	33.3867	0.0430575
33.4822	0.0654791	33.4842	-0.0845196	33.4822	0.170888	33.4844	0.0409229
33.5798	0.0652725	33.5818	-0.0836647	33.5798	0.168618	33.582	0.0389954
33.6774	0.0647054	33.6794	-0.0829341	33.6775	0.166233	33.6796	0.0372277
33.775	0.0637499	33.777	-0.0824097	33.7751	0.164054	33.7772	0.0357103
33.8726	0.0625126	33.8747	-0.0819571	33.8727	0.161872	33.8748	0.0342644
33.9703	0.0615677	33.9723	-0.0816517	33.9703	0.15985	33.9725	0.0328662
34.0679	0.0607475	34.0699	-0.0813999	34.0679	0.157943	34.0701	0.0317636
34.1655	0.0598007	34.1675	-0.0810751	34.1655	0.156364	34.1677	0.0309053
34.2631	0.05932	34.2651	-0.0807688	34.2631	0.15508	34.2653	0.0303726
34.3607	0.0591032	34.3628	-0.0803958	34.3608	0.154063	34.363	0.0301612
34.4583	0.0587957	34.4604	-0.0801864	34.4584	0.153159	34.4606	0.030253
34.556	0.0585556	34.558	-0.0797765	34.556	0.152515	34.5582	0.0306563
34.6536	0.0578008	34.6556	-0.079267	34.6536	0.152027	34.6558	0.0313598
34.7512	0.0572944	34.7532	-0.0787972	34.7512	0.151823	34.7534	0.0322164
34.8488	0.0567716	34.8508	-0.0783486	34.8489	0.151898	34.8511	0.0330979
34.9464	0.0563913	34.9485	-0.0779297	34.9465	0.152293	34.9487	0.0339025
35.044	0.0563835	35.0461	-0.0774833	35.0441	0.152675	35.0463	0.0347764
35.1416	0.0569889	35.1437	-0.0771738	35.1417	0.152956	35.1439	0.0354693
35.2393	0.0581544	35.2413	-0.0769437	35.2393	0.153165	35.2415	0.0359082
35.3369	0.0596062	35.3389	-0.0767554	35.3369	0.153265	35.3392	0.0363424
35.4345	0.0610472	35.4366	-0.0763919	35.4345	0.15349	35.4368	0.0365762
35.5321	0.0618432	35.5342	-0.0759243	35.5322	0.153327	35.5344	0.0362887
35.6297	0.0629864	35.6318	-0.0754023	35.6298	0.152846	35.632	0.035901
35.7273	0.0639784	35.7294	-0.0748005	35.7274	0.152188	35.7296	0.0353137
35.825	0.0650978	35.827	-0.0742509	35.825	0.151342	35.8273	0.0345557
35.9226	0.0658409	35.9247	-0.0736122	35.9226	0.150184	35.9249	0.0335896
36.0202	0.0662294	36.0223	-0.073082	36.0202	0.148731	36.0225	0.0323132
36.1178	0.066519	36.1199	-0.0727104	36.1179	0.147164	36.1201	0.0310284
36.2154	0.0665986	36.2175	-0.0723577	36.2155	0.145292	36.2177	0.0295423
36.313	0.0667809	36.3152	-0.072228	36.3131	0.14291	36.3154	0.0277374
36.4106	0.0672374	36.4128	-0.0722703	36.4107	0.140195	36.413	0.0254865
36.5083	0.0676822	36.5104	-0.0726393	36.5083	0.137161	36.5106	0.0232715
36.6059	0.0682404	36.608	-0.0730933	36.6059	0.133792	36.6082	0.0204942
36.7035	0.0689991	36.7056	-0.0734343	36.7035	0.130104	36.7058	0.017478
36.8011	0.0700681	36.8033	-0.0735951	36.8012	0.126081	36.8035	0.0143481
36.8987	0.0713331	36.9009	-0.0737091	36.8988	0.121759	36.9011	0.0108234
36.9963	0.0725035	36.9985	-0.0737032	36.9964	0.117231	36.9987	0.00694936
37.094	0.073186	37.0961	-0.0735118	37.094	0.112518	37.0963	0.00263354
37.1916	0.0734144	37.1937	-0.0732825	37.1916	0.10781	37.1939	-0.00174273
37.2892	0.0732539	37.2913	-0.0729915	37.2892	0.103253	37.2916	-0.00606235
37.3868	0.072504	37.389	-0.0726559	37.3869	0.0985804	37.3892	-0.00996045
37.4844	0.0720461	37.4866	-0.0723158	37.4845	0.0941138	37.4868	-0.0135317
37.582	0.0714631	37.5842	-0.0719406	37.5821	0.0896898	37.5844	-0.0165724
37.6796	0.0711711	37.6818	-0.0717424	37.6797	0.085147	37.682	-0.0190948
37.7773	0.0709218	37.7794	-0.0715632	37.7773	0.0805165	37.7797	-0.0211161
37.8749	0.0704377	37.8771	-0.0715181	37.8749	0.0759924	37.8773	-0.0223777
37.9725	0.0705274	37.9747	-0.0714717	37.9725	0.0714432	37.9749	-0.0227468
38.0701	0.0711138	38.0723	-0.0714267	38.0702	0.0665733	38.0725	-0.0223494
38.1677	0.071789	38.1699	-0.0713749	38.1678	0.0615893	38.1702	-0.0212265
38.2653	0.0721198	38.2676	-0.0712627	38.2654	0.0567436	38.2678	-0.0196571
38.3629	0.0726762	38.3652	-0.0710542	38.363	0.0520314	38.3654	-0.0177364
38.4606	0.0732049	38.4628	-0.0707348	38.4606	0.0472702	38.463	-0.0156389
38.5582	0.0737612	38.5604	-0.0704339	38.5582	0.0429261	38.5606	-0.0130743
38.6558	0.0741881	38.658	-0.0703681	38.6559	0.0387258	38.6583	-0.0102704
38.7534	0.0741798	38.7557	-0.0705312	38.7535	0.0345027	38.7559	-0.00709733
38.851	0.0740508	38.8533	-0.0706902	38.8511	0.0302422	38.8535	-0.00347489
38.9486	0.0734503	38.9509	-0.0708569	38.9487	0.0262032	38.9511	0.000251136
39.0463	0.0727087	39.0485	-0.0710433	39.0463	0.0225218	39.0487	0.004219
39.1439	0.0720747	39.1461	-0.0714483	39.1439	0.018787	39.1464	0.00832849
39.2415	0.0715528	39.2437	-0.0718942	39.2415	0.015053	39.244	0.0127339
39.3391	0.0711745	39.3414	-0.0724866	39.3392	0.0112808	39.3416	0.0172476
39.4367	0.0708325	39.439	-0.0731568	39.4368	0.00753543	39.4392	0.0217583
39.5343	0.0703722	39.5366	-0.0738036	39.5344	0.00376086	39.5368	0.0259651
39.6319	0.0695724	39.6342	-0.0741753	39.632	0	39.6345	0.0298818
39.7296	0.0686435	39.7318	-0.0744978	39.7296	-0.00349001	39.7321	0.0330611
39.8272	0.0677205	39.8295	-0.074682	39.8272	-0.00700377	39.8297	0.0354359
39.9248	0.066211	39.9271	-0.0747315	39.9249	-0.0104545	39.9273	0.0371744
40.0224	0.0646526	40.0247	-0.0745946	40.0225	-0.0137006	40.0249	0.0381549
40.12	0.0631276	40.1223	-0.0742217	40.1201	-0.0168028	40.1226	0.0382986
40.2176	0.0618393	40.2199	-0.0736663	40.2177	-0.0199489	40.2202	0.0380035
40.3152	0.0600252	40.3176	-0.0728956	40.3153	-0.0230475	40.3178	0.037163
40.4129	0.0579114	40.4152	-0.0718762	40.4129	-0.0259771	40.4154	0.0360562
40.5105	0.0559198	40.5128	-0.0708208	40.5105	-0.0289537	40.513	0.0344766
40.6081	0.0540073	40.6104	-0.0697695	40.6082	-0.0316504	40.6107	0.0326109
40.7057	0.0523635	40.708	-0.0686885	40.7058	-0.0341483	40.7083	0.0305608
40.8033	0.0509273	40.8057	-0.0675939	40.8034	-0.0361895	40.8059	0.0282134
40.9009	0.0498597	40.9033	-0.0665858	40.901	-0.0380307	40.9035	0.025637
40.9986	0.0485481	41.0009	-0.0655737	40.9986	-0.0399248	41.0011	0.0232098
41.0962	0.0473699	41.0985	-0.0645435	41.0962	-0.041523	41.0988	0.0205931
41.1938	0.0463509	41.1961	-0.0634652	41.1939	-0.0429192	41.1964	0.0173892
41.2914	0.0455059	41.2938	-0.0624309	41.2915	-0.0441008	41.294	0.0136298
41.389	0.044692	41.3914	-0.0614017	41.3891	-0.0450797	41.3916	0.0096776
41.4866	0.0439198	41.489	-0.0603927	41.4867	-0.0459831	41.4892	0.00559771
41.5842	0.043217	41.5866	-0.0594693	41.5843	-0.0468541	41.5869	0.00113476
41.6819	0.0422818	41.6842	-0.0584283	41.6819	-0.0478905	41.6845	-0.00330282
41.7795	0.0416391	41.7819	-0.0575874	41.7795	-0.0489337	41.7821	-0.00751927
41.8771	0.0415509	41.8795	-0.0570464	41.8772	-0.0500441	41.8797	-0.011811
41.9747	0.0415853	41.9771	-0.0568901	41.9748	-0.0510443	41.9773	-0.0161074
42.0723	0.0415281	42.0747	-0.0570775	42.0724	-0.0519912	42.075	-0.0201302
42.1699	0.041028	42.1723	-0.0575617	42.17	-0.0527014	42.1726	-0.0239386
42.2675	0.0406361	42.27	-0.0583283	42.2676	-0.0533463	42.2702	-0.0269599
42.3652	0.0407336	42.3676	-0.0593734	42.3653	-0.0538912	42.3678	-0.0297647
42.4628	0.0406851	42.4652	-0.0604454	42.4629	-0.0544864	42.4654	-0.0321479
42.5604	0.0407156	42.5628	-0.0613828	42.5605	-0.0553104	42.5631	-0.0340187
42.658	0.0408931	42.6604	-0.0623008	42.6581	-0.056038	42.6607	-0.0355598
42.7556	0.0406511	42.7581	-0.0630895	42.7557	-0.05702	42.7583	-0.036588
42.8532	0.040314	42.8557	-0.0635778	42.8533	-0.0581924	42.8559	-0.0368518
42.9509	0.0400754	42.9533	-0.0635958	42.9509	-0.0593425	42.9535	-0.0366891
43.0485	0.0398595	43.0509	-0.0629269	43.0486	-0.0605958	43.0512	-0.0359458
43.1461	0.0397572	43.1485	-0.0617557	43.1462	-0.0619131	43.1488	-0.0346364
43.2437	0.0396747	43.2462	-0.0602364	43.2438	-0.0631856	43.2464	-0.0330201
43.3413	0.0392231	43.3438	-0.0582211	43.3414	-0.064597	43.344	-0.0312004
43.4389	0.0389845	43.4414	-0.0557527	43.439	-0.0657973	43.4416	-0.0290146
43.5365	0.0386115	43.539	-0.0529262	43.5366	-0.066819	43.5393	-0.0264424
43.6342	0.0386925	43.6366	-0.0494281	43.6343	-0.067495	43.6369	-0.0234427
43.7318	0.0390262	43.7343	-0.0450016	43.7319	-0.0678316	43.7345	-0.0203691
43.8294	0.0388181	43.8319	-0.039613	43.8295	-0.0677983	43.8321	-0.0169686
43.927	0.0386294	43.9295	-0.0333402	43.9271	-0.0676142	43.9298	-0.0134645
44.0246	0.0383719	44.0271	-0.026339	44.0247	-0.0672073	44.0274	-0.00986109
44.1222	0.0384839	44.1247	-0.0183568	44.1223	-0.0667889	44.125	-0.00614648
44.2198	0.0391324	44.2223	-0.0093777	44.2199	-0.066334	44.2226	-0.00264031
44.3175	0.039763	44.32	0.000264859	44.3176	-0.0657589	44.3202	0.00091153
44.4151	0.0401098	44.4176	0.0102723	44.4152	-0.0651821	44.4178	0.00438853
44.5127	0.0402228	44.5152	0.0209234	44.5128	-0.0643663	44.5155	0.00774039
44.6103	0.0397033	44.6128	0.0317997	44.6104	-0.0636095	44.6131	0.010798
44.7079	0.0395617	44.7104	0.0426652	44.708	-0.0627252	44.7107	0.0136319
44.8055	0.0399458	44.8081	0.0531758	44.8056	-0.0618167	44.8083	0.015915
44.9032	0.0404585	44.9057	0.0631863	44.9033	-0.0610229	44.9059	0.0177926
45.0008	0.0411323	45.0033	0.0725325	45.0009	-0.0603606	45.0036	0.0192115
45.0984	0.0414024	45.1009	0.0809246	45.0985	-0.0598075	45.1012	0.0203716
45.196	0.0417507	45.1986	0.088951	45.1961	-0.0593206	45.1988	0.0215985
45.2936	0.0426277	45.2962	0.0963635	45.2937	-0.0588063	45.2964	0.0230208
45.3912	0.0433974	45.3938	0.103218	45.3913	-0.0584007	45.394	0.0244439
45.4888	0.0443374	45.4914	0.109635	45.4889	-0.058165	45.4917	0.0259545
45.5864	0.0451674	45.589	0.11507	45.5866	-0.0582947	45.5893	0.0274372
45.6841	0.0453735	45.6866	0.119587	45.6842	-0.0587757	45.6869	0.0290607
45.7817	0.045778	45.7843	0.123403	45.7818	-0.0593599	45.7845	0.0305802
45.8793	0.0459158	45.8819	0.126473	45.8794	-0.0599007	45.8821	0.0322236
45.9769	0.0461185	45.9795	0.129061	45.977	-0.0604287	45.9798	0.0339435
46.0745	0.0462155	46.0771	0.131041	46.0746	-0.0609361	46.0774	0.0355856
46.1721	0.0454269	46.1747	0.131977	46.1723	-0.0613015	46.175	0.037141
46.2698	0.0444946	46.2724	0.132265	46.2699	-0.0616619	46.2726	0.0383384
46.3674	0.0443103	46.37	0.132222	46.3675	-0.0618798	46.3703	0.0392934
46.465	0.0444049	46.4676	0.131443	46.4651	-0.0621004	46.4679	0.0401682
46.5626	0.0447264	46.5652	0.130598	46.5627	-0.0621835	46.5655	0.0410704
46.6602	0.0448807	46.6628	0.129637	46.6603	-0.0622109	46.6631	0.0418665
46.7578	0.0443205	46.7605	0.128731	46.7579	-0.0622292	46.7607	0.0428064
46.8554	0.0441415	46.8581	0.127719	46.8556	-0.0621438	46.8583	0.0436701
46.9531	0.0435982	46.9557	0.126641	46.9532	-0.0620785	46.956	0.04458
47.0507	0.043201	47.0533	0.125742	47.0508	-0.0621104	47.0536	0.0454695
47.1483	0.0426451	47.1509	0.124763	47.1484	-0.0622433	47.1512	0.0460394
47.2459	0.0414665	47.2485	0.123597	47.246	-0.0624941	47.2488	0.0464825
47.3435	0.039972	47.3462	0.122083	47.3436	-0.0626179	47.3464	0.0469366
47.4411	0.0386144	47.4438	0.120307	47.4413	-0.0625279	47.4441	0.0472604
47.5387	0.0371961	47.5414	0.11859	47.5389	-0.0620935	47.5417	0.0477357
47.6364	0.0360344	47.639	0.117022	47.6365	-0.0613303	47.6393	0.0483364
47.734	0.0348699	47.7367	0.115594	47.7341	-0.0604871	47.7369	0.0491702
47.8316	0.0335011	47.8343	0.114613	47.8317	-0.0595937	47.8345	0.0502677
47.9292	0.0322889	47.9319	0.113936	47.9293	-0.0585313	47.9322	0.0514249
48.0268	0.031573	48.0295	0.113673	48.0269	-0.0573228	48.0298	0.0527
48.1244	0.0315357	48.1271	0.114026	48.1246	-0.0560571	48.1274	0.0542153
48.222	0.0316147	48.2247	0.115148	48.2222	-0.0544626	48.225	0.0560109
48.3197	0.0312776	48.3224	0.116958	48.3198	-0.0526795	48.3226	0.0579286
48.4173	0.0304191	48.42	0.119437	48.4174	-0.0508013	48.4203	0.0597623
48.5149	0.0301625	48.5176	0.122097	48.515	-0.048851	48.5179	0.0614378
48.6125	0.0301518	48.6152	0.125034	48.6126	-0.0467906	48.6155	0.0629936
48.7101	0.0307552	48.7128	0.127936	48.7103	-0.0445946	48.7131	0.064295
48.8077	0.030974	48.8105	0.130894	48.8079	-0.0424611	48.8108	0.0655756
48.9054	0.0312616	48.9081	0.133774	48.9055	-0.0402783	48.9084	0.0667522
49.003	0.0314736	49.0057	0.136454	49.0031	-0.0377895	49.006	0.0678586
49.1006	0.0318674	49.1033	0.138905	49.1007	-0.0352363	49.1036	0.0691617
49.1982	0.0328186	49.2009	0.141239	49.1983	-0.0330142	49.2012	0.0703527
49.2958	0.0340885	49.2986	0.143665	49.296	-0.0310899	49.2988	0.0712942
49.3934	0.0354815	49.3962	0.146074	49.3936	-0.0294484	49.3965	0.0721394
49.491	0.0365442	49.4938	0.148255	49.4912	-0.0283376	49.4941	0.0725896
49.5887	0.0375716	49.5914	0.150061	49.5888	-0.027715	49.5917	0.0728154
49.6863	0.0385528	49.689	0.151461	49.6864	-0.027245	49.6893	0.0727283
49.7839	0.0398454	49.7867	0.152386	49.784	-0.0269536	49.7869	0.0721956
49.8815	0.040686	49.8843	0.152889	49.8817	-0.0269769	49.8846	0.0715136
49.9791	0.0407559	49.9819	0.152763	49.9793	-0.0274538	49.9822	0.0707526
50.0767	0.0401612	50.0795	0.152331	50.0769	-0.0281887	50.0798	0.0697578
50.1743	0.0391412	50.1771	0.151337	50.1745	-0.0292903	50.1774	0.0688158
50.272	0.0382914	50.2748	0.149513	50.2721	-0.0308885	50.275	0.0681914
50.3696	0.0375861	50.3724	0.146925	50.3697	-0.0326885	50.3727	0.0677445
50.4672	0.0365908	50.47	0.143941	50.4673	-0.0345352	50.4703	0.0675906
50.5648	0.0355834	50.5676	0.140755	50.565	-0.0364572	50.5679	0.0675631
50.6624	0.034427	50.6652	0.137722	50.6626	-0.0385568	50.6655	0.0678696
50.76	0.0337853	50.7628	0.134643	50.7602	-0.0407259	50.7631	0.0684286
50.8577	0.0336805	50.8605	0.131778	50.8578	-0.0427562	50.8608	0.0691676
50.9553	0.0339725	50.9581	0.129368	50.9554	-0.0447371	50.9584	0.0701527
51.0529	0.0342558	51.0557	0.127238	51.053	-0.0466093	51.056	0.0712012
51.1505	0.0345221	51.1533	0.125583	51.1507	-0.0479014	51.1536	0.0721643
51.2481	0.0349499	51.2509	0.124384	51.2483	-0.0487706	51.2512	0.0728763
51.3457	0.0355232	51.3486	0.12373	51.3459	-0.0493676	51.3489	0.0736107
51.4433	0.0364608	51.4462	0.123707	51.4435	-0.0495562	51.4465	0.0744778
51.541	0.0373635	51.5438	0.124057	51.5411	-0.0493192	51.5441	0.0752824
51.6386	0.0379441	51.6414	0.124724	51.6387	-0.0490305	51.6417	0.0759834
51.7362	0.0383602	51.739	0.125548	51.7363	-0.0486966	51.7393	0.0765567
51.8338	0.0389801	51.8367	0.126514	51.834	-0.048424	51.837	0.0768467
51.9314	0.0396757	51.9343	0.127587	51.9316	-0.0479307	51.9346	0.0766793
52.029	0.0408461	52.0319	0.128596	52.0292	-0.047389	52.0322	0.0761774
52.1266	0.0423231	52.1295	0.129447	52.1268	-0.0469377	52.1298	0.0753627
52.2243	0.0434173	52.2271	0.130375	52.2244	-0.0464024	52.2274	0.0742148
52.3219	0.0446862	52.3248	0.131383	52.322	-0.0460886	52.3251	0.0728615
52.4195	0.0458474	52.4224	0.132321	52.4197	-0.046116	52.4227	0.0712853
52.5171	0.0466613	52.52	0.133131	52.5173	-0.0464677	52.5203	0.0695802
52.6147	0.0475785	52.6176	0.133872	52.6149	-0.0467797	52.6179	0.0677639
52.7123	0.0478923	52.7152	0.134739	52.7125	-0.0470304	52.7155	0.0658969
52.8099	0.0482071	52.8129	0.135618	52.8101	-0.0473716	52.8132	0.0641174
52.9076	0.0484492	52.9105	0.136419	52.9077	-0.0479403	52.9108	0.0623928
53.0052	0.0486199	53.0081	0.137394	53.0053	-0.0486829	53.0084	0.0608679
53.1028	0.0485733	53.1057	0.138379	53.103	-0.0497257	53.106	0.0595082
53.2004	0.0481383	53.2033	0.139409	53.2006	-0.0509808	53.2036	0.0584715
53.298	0.0471808	53.3009	0.140381	53.2982	-0.0522849	53.3012	0.0574272
53.3956	0.0462291	53.3986	0.141182	53.3958	-0.0534765	53.3989	0.0562371
53.4932	0.0454332	53.4962	0.142062	53.4934	-0.0547079	53.4965	0.0551082
53.5909	0.044742	53.5938	0.14278	53.591	-0.0560407	53.5941	0.0540821
53.6885	0.0439169	53.6914	0.1435	53.6887	-0.0572908	53.6917	0.0530581
53.7861	0.0428823	53.789	0.144142	53.7863	-0.058377	53.7893	0.0521407
53.8837	0.0421222	53.8867	0.144642	53.8839	-0.0594394	53.887	0.0515433
53.9813	0.0419287	53.9843	0.145051	53.9815	-0.0603588	53.9846	0.0511577
54.0789	0.0417963	54.0819	0.145324	54.0791	-0.0611065	54.0822	0.0509953
54.1766	0.0420354	54.1795	0.145435	54.1767	-0.0617624	54.1798	0.0508892
54.2742	0.0422484	54.2771	0.145434	54.2743	-0.062221	54.2774	0.0508706
54.3718	0.0423313	54.3748	0.145512	54.372	-0.0624959	54.3751	0.0511619
54.4694	0.0425704	54.4724	0.145545	54.4696	-0.0625507	54.4727	0.0519437
54.567	0.043135	54.57	0.145405	54.5672	-0.0625083	54.5703	0.0530125
54.6646	0.0442065	54.6676	0.14521	54.6648	-0.0625535	54.6679	0.0544825
54.7622	0.0447958	54.7652	0.14485	54.7624	-0.0626859	54.7655	0.0561538
54.8599	0.0453342	54.8629	0.14464	54.86	-0.0628102	54.8632	0.0578225
54.9575	0.0452227	54.9605	0.144467	54.9577	-0.0628513	54.9608	0.0592482
55.0551	0.0451276	55.0581	0.144561	55.0553	-0.0627115	55.0584	0.0605364
55.1527	0.0450223	55.1557	0.144552	55.1529	-0.0625174	55.156	0.0618572
55.2503	0.0450466	55.2533	0.14439	55.2505	-0.0623584	55.2536	0.0633686
55.3479	0.0447992	55.3509	0.144244	55.3481	-0.0623945	55.3513	0.0651245
55.4455	0.0442419	55.4486	0.144162	55.4457	-0.0624827	55.4489	0.0668106
55.5432	0.0432796	55.5462	0.144397	55.5433	-0.0624639	55.5465	0.068418
55.6408	0.0425695	55.6438	0.144814	55.641	-0.0624502	55.6441	0.0702241
55.7384	0.0422372	55.7414	0.145568	55.7386	-0.0625361	55.7417	0.0723491
55.836	0.0419316	55.839	0.146685	55.8362	-0.0624233	55.8394	0.0748173
55.9336	0.0411817	55.9367	0.147732	55.9338	-0.0623128	55.937	0.0776111
56.0312	0.040167	56.0343	0.148938	56.0314	-0.0622164	56.0346	0.0807469
56.1288	0.0387303	56.1319	0.150445	56.1291	-0.0621168	56.1322	0.0842721
56.2265	0.0375143	56.2295	0.152305	56.2267	-0.0617277	56.2298	0.0879241
56.3241	0.036682	56.3271	0.154262	56.3243	-0.0612275	56.3275	0.0914798
56.4217	0.0359622	56.4248	0.156375	56.4219	-0.0606141	56.4251	0.0946815
56.5193	0.035126	56.5224	0.158629	56.5195	-0.0600318	56.5227	0.0976237
56.6169	0.0336291	56.62	0.160936	56.6171	-0.0591082	56.6203	0.10013
56.7145	0.0320047	56.7176	0.163443	56.7147	-0.0577773	56.7179	0.102209
56.8122	0.0299665	56.8152	0.165848	56.8124	-0.0562074	56.8155	0.103947
56.9098	0.0285357	56.9128	0.168477	56.91	-0.0545024	56.9132	0.105679
57.0074	0.0270228	57.0105	0.170956	57.0076	-0.0528901	57.0108	0.107336
57.105	0.0256831	57.1081	0.173472	57.1052	-0.0512069	57.1084	0.108581
57.2026	0.024032	57.2057	0.175997	57.2028	-0.0496942	57.206	0.109516
57.3002	0.0226254	57.3033	0.178412	57.3004	-0.0482084	57.3037	0.110002
57.3978	0.0215035	57.4009	0.180434	57.3981	-0.0467911	57.4013	0.110358
57.4955	0.0206988	57.4986	0.182087	57.4957	-0.045409	57.4989	0.110626
57.5931	0.0200139	57.5962	0.183268	57.5933	-0.0443068	57.5965	0.110657
57.6907	0.0191568	57.6938	0.183631	57.6909	-0.0432915	57.6941	0.110412
57.7883	0.0185942	57.7914	0.183456	57.7885	-0.0427247	57.7917	0.109701
57.8859	0.0179481	57.889	0.183324	57.8861	-0.0423903	57.8894	0.108749
57.9835	0.0176862	57.9867	0.183017	57.9837	-0.0421373	57.987	0.107388
58.0811	0.0179156	58.0843	0.182436	58.0814	-0.04176	58.0846	0.105524
58.1788	0.0178637	58.1819	0.181612	58.179	-0.0414933	58.1822	0.103389
58.2764	0.0173471	58.2795	0.180479	58.2766	-0.0411297	58.2798	0.101227
58.374	0.0169683	58.3771	0.179156	58.3742	-0.0407232	58.3775	0.0989673
58.4716	0.0163208	58.4747	0.177578	58.4718	-0.0399422	58.4751	0.0965262
58.5692	0.0159294	58.5724	0.175812	58.5694	-0.0391232	58.5727	0.0940097
58.6668	0.0158154	58.67	0.174063	58.6671	-0.0383582	58.6703	0.0914464
58.7644	0.0156	58.7676	0.171967	58.7647	-0.0375904	58.7679	0.0889625
58.8621	0.0153604	58.8652	0.169081	58.8623	-0.0368262	58.8656	0.0862338
58.9597	0.0153478	58.9628	0.16581	58.9599	-0.0359525	58.9632	0.0833885
59.0573	0.0154036	59.0605	0.162388	59.0575	-0.0351892	59.0608	0.0808403
59.1549	0.0160448	59.1581	0.158729	59.1551	-0.0342232	59.1584	0.0783759
59.2525	0.0166899	59.2557	0.154949	59.2527	-0.0332006	59.256	0.0759377
59.3501	0.0170547	59.3533	0.151327	59.3504	-0.0321615	59.3536	0.0735587
59.4477	0.0177769	59.4509	0.147929	59.448	-0.0312776	59.4513	0.071424
59.5454	0.0185898	59.5486	0.144965	59.5456	-0.030139	59.5489	0.0692023
59.643	0.0194416	59.6462	0.142667	59.6432	-0.0287815	59.6465	0.0669412
59.7406	0.0202404	59.7438	0.140922	59.7408	-0.0269609	59.7441	0.0647338
59.8382	0.0208419	59.8414	0.139374	59.8384	-0.0248247	59.8417	0.0625125
59.9358	0.0214526	59.939	0.137976	59.9361	-0.0221637	59.9394	0.0603846
60.0334	0.0218289	60.0367	0.136539	60.0337	-0.0192387	60.037	0.0586588
60.131	0.0220749	60.1343	0.135124	60.1313	-0.0159917	60.1346	0.0573033
60.2287	0.0223586	60.2319	0.134059	60.2289	-0.0123893	60.2322	0.0562629
60.3263	0.022557	60.3295	0.133091	60.3265	-0.00843888	60.3298	0.055723
60.4239	0.0226894	60.4271	0.132167	60.4241	-0.00432449	60.4275	0.0556955
60.5215	0.022881	60.5247	0.131158	60.5217	9.59171e-05	60.5251	0.0562447
60.6191	0.0230532	60.6224	0.129703	60.6194	0.00482874	60.6227	0.0573955
60.7167	0.0233243	60.72	0.128394	60.717	0.00989453	60.7203	0.0592279
60.8143	0.0237274	60.8176	0.127277	60.8146	0.0154038	60.8179	0.0617134
60.912	0.0238021	60.9152	0.126237	60.9122	0.0212465	60.9156	0.0648328
61.0096	0.0241421	61.0128	0.125126	61.0098	0.0276369	61.0132	0.0682007
61.1072	0.0245961	61.1105	0.124159	61.1074	0.0342561	61.1108	0.0718569
61.2048	0.02528	61.2081	0.123428	61.2051	0.0413302	61.2084	0.0758561
61.3024	0.0261934	61.3057	0.122917	61.3027	0.0488725	61.306	0.0797927
61.4	0.0268322	61.4033	0.12249	61.4003	0.0570798	61.4037	0.0836772
61.4976	0.0273555	61.5009	0.121884	61.4979	0.0656959	61.5013	0.0878434
61.5953	0.0280516	61.5985	0.121121	61.5955	0.0746363	61.5989	0.0919939
61.6929	0.0287166	61.6962	0.12004	61.6931	0.0838525	61.6965	0.0960569
61.7905	0.0297124	61.7938	0.118846	61.7907	0.0934296	61.7941	0.100004
61.8881	0.0306049	61.8914	0.117697	61.8884	0.102968	61.8917	0.10388
61.9857	0.0313009	61.989	0.116889	61.986	0.112532	61.9894	0.107355
62.0833	0.0322395	62.0866	0.116308	62.0836	0.122245	62.087	0.11035
62.1809	0.0333085	62.1843	0.115659	62.1812	0.131839	62.1846	0.112791
62.2786	0.034169	62.2819	0.114955	62.2788	0.141256	62.2822	0.114817
62.3762	0.0351764	62.3795	0.11442	62.3764	0.150493	62.3798	0.116266
62.4738	0.0360199	62.4771	0.114207	62.474	0.159298	62.4775	0.116912
62.5714	0.0370089	62.5747	0.114577	62.5717	0.168016	62.5751	0.11689
62.669	0.0383326	62.6724	0.115337	62.6693	0.176499	62.6727	0.116059
62.7666	0.0393051	62.77	0.116528	62.7669	0.184645	62.7703	0.114553
62.8642	0.0405284	62.8676	0.118081	62.8645	0.192592	62.8679	0.112283
62.9619	0.0412433	62.9652	0.119912	62.9621	0.200101	62.9656	0.109436
63.0595	0.0417492	63.0628	0.121886	63.0597	0.207462	63.0632	0.106138
63.1571	0.0420354	63.1604	0.123658	63.1574	0.214517	63.1608	0.102532
63.2547	0.042504	63.2581	0.12523	63.255	0.221211	63.2584	0.0987069
63.3523	0.0430322	63.3557	0.126655	63.3526	0.227424	63.356	0.0946329
63.4499	0.0433945	63.4533	0.128086	63.4502	0.233481	63.4537	0.0903357
63.5475	0.0432922	63.5509	0.129346	63.5478	0.238897	63.5513	0.085877
63.6452	0.0428881	63.6485	0.130475	63.6454	0.243887	63.6489	0.0812872
63.7428	0.0422949	63.7462	0.131393	63.7431	0.248185	63.7465	0.0767105
63.8404	0.0415955	63.8438	0.132052	63.8407	0.252023	63.8441	0.0719808
63.938	0.0410105	63.9414	0.132383	63.9383	0.255504	63.9418	0.0672152
64.0356	0.0402	64.039	0.132331	64.0359	0.258326	64.0394	0.0623772
64.1332	0.039569	64.1366	0.132203	64.1335	0.260571	64.137	0.05759
64.2309	0.0388967	64.2343	0.132013	64.2311	0.262471	64.2346	0.0528873
64.3285	0.0382108	64.3319	0.131628	64.3288	0.263842	64.3322	0.0483728
64.4261	0.0377923	64.4295	0.131095	64.4264	0.264797	64.4298	0.044101
64.5237	0.0371893	64.5271	0.130437	64.524	0.265251	64.5275	0.0399521
64.6213	0.0366345	64.6247	0.129781	64.6216	0.265203	64.6251	0.0360646
64.7189	0.0364346	64.7223	0.129059	64.7192	0.264953	64.7227	0.0323648
64.8165	0.0361906	64.82	0.128296	64.8168	0.264356	64.8203	0.0289432
64.9142	0.0362765	64.9176	0.127635	64.9144	0.263607	64.9179	0.0259338
65.0118	0.0362595	65.0152	0.127233	65.0121	0.26267	65.0156	0.023362
65.1094	0.0360359	65.1128	0.12702	65.1097	0.261794	65.1132	0.0210667
65.207	0.0358705	65.2104	0.127123	65.2073	0.260879	65.2108	0.0189654
65.3046	0.035871	65.3081	0.127324	65.3049	0.260014	65.3084	0.0169111
65.4022	0.0358201	65.4057	0.127555	65.4025	0.258825	65.406	0.014962
65.4998	0.0360408	65.5033	0.127596	65.5001	0.257923	65.5037	0.013325
65.5975	0.0360786	65.6009	0.127432	65.5978	0.257029	65.6013	0.0117417
65.6951	0.0363827	65.6985	0.127153	65.6954	0.256472	65.6989	0.0100945
65.7927	0.0365525	65.7961	0.126874	65.793	0.255899	65.7965	0.00848873
65.8903	0.0367892	65.8938	0.126445	65.8906	0.255347	65.8941	0.00691765
65.9879	0.0369284	65.9914	0.125853	65.9882	0.254898	65.9918	0.00539815
66.0855	0.0365685	66.089	0.12517	66.0858	0.254632	66.0894	0.00377338
66.1831	0.0361494	66.1866	0.124298	66.1834	0.254571	66.187	0.00192918
66.2808	0.0355261	66.2842	0.123543	66.2811	0.254859	66.2846	-2.36761e-05
66.3784	0.0347855	66.3819	0.12277	66.3787	0.255577	66.3822	-0.00198964
66.476	0.0338396	66.4795	0.121947	66.4763	0.256371	66.4798	-0.00412302
66.5736	0.032708	66.5771	0.120913	66.5739	0.257317	66.5775	-0.00638789
66.6712	0.0309657	66.6747	0.119785	66.6715	0.258326	66.6751	-0.00863797
66.7688	0.0293665	66.7723	0.118476	66.7691	0.259542	66.7727	-0.0107489
66.8664	0.0276408	66.87	0.116975	66.8668	0.260721	66.8703	-0.0130658
66.9641	0.0260032	66.9676	0.115146	66.9644	0.261874	66.9679	-0.0156157
67.0617	0.0244715	67.0652	0.113309	67.062	0.262575	67.0656	-0.0183409
67.1593	0.0225274	67.1628	0.11136	67.1596	0.263028	67.1632	-0.0209178
67.2569	0.0203762	67.2604	0.109364	67.2572	0.263193	67.2608	-0.0233218
67.3545	0.018177	67.358	0.107493	67.3548	0.263243	67.3584	-0.0257905
67.4521	0.0159798	67.4557	0.10622	67.4524	0.263162	67.456	-0.0282722
67.5497	0.0139397	67.5533	0.10554	67.5501	0.263032	67.5537	-0.0304838
67.6474	0.0117914	67.6509	0.105216	67.6477	0.262407	67.6513	-0.0325762
67.745	0.00966694	67.7485	0.10502	67.7453	0.261769	67.7489	-0.0347252
67.8426	0.00721746	67.8461	0.105019	67.8429	0.260921	67.8465	-0.0367275
67.9402	0.00494746	67.9438	0.105363	67.9405	0.260004	67.9441	-0.0384965
68.0378	0.00321633	68.0414	0.105647	68.0381	0.259069	68.0417	-0.0399995
68.1354	0.00158319	68.139	0.10609	68.1358	0.257784	68.1394	-0.0411972
68.233	0.000294907	68.2366	0.106548	68.2334	0.256266	68.237	-0.0421714
68.3307	-0.000800809	68.3342	0.106865	68.331	0.254585	68.3346	-0.0428322
68.4283	-0.00138141	68.4318	0.106827	68.4286	0.252829	68.4322	-0.0430672
68.5259	-0.00179806	68.5295	0.106589	68.5262	0.251044	68.5298	-0.0431657
68.6235	-0.00178933	68.6271	0.106534	68.6238	0.24922	68.6275	-0.0429949
68.7211	-0.00181358	68.7247	0.106766	68.7214	0.247092	68.7251	-0.0425882
68.8187	-0.00143476	68.8223	0.10705	68.8191	0.245115	68.8227	-0.0418382
68.9163	-0.00115732	68.9199	0.10753	68.9167	0.243296	68.9203	-0.0409457
69.014	-0.00075861	69.0176	0.108117	69.0143	0.241854	69.0179	-0.0396566
69.1116	-0.000147939	69.1152	0.108618	69.1119	0.240717	69.1156	-0.0382424
69.2092	0.000371544	69.2128	0.108978	69.2095	0.239689	69.2132	-0.0363872
69.3068	0.0013426	69.3104	0.109271	69.3071	0.238808	69.3108	-0.0340285
69.4044	0.00234131	69.408	0.109394	69.4048	0.237957	69.4084	-0.0311852
69.502	0.00363444	69.5057	0.109339	69.5024	0.237114	69.506	-0.0278029
69.5997	0.00482522	69.6033	0.109104	69.6	0.236616	69.6037	-0.0240207
69.6973	0.00623864	69.7009	0.108826	69.6976	0.236256	69.7013	-0.019811
69.7949	0.00795861	69.7985	0.108705	69.7952	0.235975	69.7989	-0.0152195
69.8925	0.00987211	69.8961	0.108478	69.8928	0.235504	69.8965	-0.0102057
69.9901	0.0114378	69.9937	0.108369	69.9904	0.234921	69.9941	-0.00505611
70.0877	0.0131272	70.0914	0.108461	70.0881	0.234528	70.0917	0.000245217
70.1853	0.0143966	70.189	0.108804	70.1857	0.234404	70.1894	0.00545353
70.283	0.0154031	70.2866	0.109337	70.2833	0.234233	70.287	0.010571
70.3806	0.0160734	70.3842	0.110221	70.3809	0.2341	70.3846	0.0154985
70.4782	0.0164105	70.4818	0.111232	70.4785	0.234055	70.4822	0.0203729
70.5758	0.0165589	70.5795	0.112081	70.5761	0.233877	70.5798	0.0252112
70.6734	0.0163644	70.6771	0.112922	70.6737	0.233943	70.6775	0.0299431
70.771	0.0155913	70.7747	0.113787	70.7714	0.234085	70.7751	0.0344935
70.8686	0.0149758	70.8723	0.114631	70.869	0.234258	70.8727	0.0390973
70.9663	0.0142375	70.9699	0.11549	70.9666	0.234279	70.9703	0.0435217
71.0639	0.0135876	71.0675	0.116274	71.0642	0.234276	71.0679	0.0479919
71.1615	0.0132655	71.1652	0.117094	71.1618	0.234371	71.1655	0.0521817
71.2591	0.0125088	71.2628	0.118025	71.2595	0.234456	71.2632	0.0559293
71.3567	0.0119423	71.3604	0.11891	71.3571	0.234813	71.3608	0.0592477
71.4543	0.011253	71.458	0.120015	71.4547	0.235466	71.4584	0.0620495
71.5519	0.010672	71.5556	0.121054	71.5523	0.236187	71.556	0.0645047
71.6496	0.0100264	71.6532	0.121965	71.6499	0.237049	71.6536	0.0669344
71.7472	0.00944624	71.7509	0.122671	71.7475	0.238206	71.7513	0.0690429
71.8448	0.00870025	71.8485	0.123187	71.8451	0.239891	71.8489	0.0708955
71.9424	0.00855376	71.9461	0.123579	71.9428	0.241933	71.9465	0.0729004
72.04	0.00813565	72.0437	0.123799	72.0404	0.244122	72.0441	0.074715
72.1376	0.0078519	72.1413	0.123534	72.138	0.246078	72.1417	0.0768822
72.2352	0.00742118	72.239	0.122957	72.2356	0.248151	72.2394	0.0794079
72.3329	0.00664996	72.3366	0.122146	72.3332	0.250153	72.337	0.0822989
72.4305	0.00630267	72.4342	0.121011	72.4308	0.251816	72.4346	0.085513
72.5281	0.00638076	72.5318	0.119742	72.5285	0.253505	72.5322	0.0889646
72.6257	0.00661261	72.6294	0.118053	72.6261	0.254913	72.6298	0.09262
72.7233	0.00688812	72.7271	0.115998	72.7237	0.255805	72.7275	0.096916
72.8209	0.00717624	72.8247	0.11367	72.8213	0.256182	72.8251	0.101564
72.9185	0.00730429	72.9223	0.110965	72.9189	0.256345	72.9227	0.106658
73.0162	0.0074595	73.0199	0.10806	73.0165	0.256238	73.0203	0.112052
73.1138	0.00734115	73.1175	0.105079	73.1141	0.255931	73.1179	0.117542
73.2114	0.00739499	73.2151	0.101819	73.2118	0.255592	73.2155	0.123288
73.309	0.00713016	73.3128	0.0983404	73.3094	0.254783	73.3132	0.129233
73.4066	0.00666645	73.4104	0.0945396	73.407	0.253571	73.4108	0.135332
73.5042	0.00598206	73.508	0.0908897	73.5046	0.252255	73.5084	0.141605
73.6018	0.00536799	73.6056	0.087502	73.6022	0.250782	73.606	0.147664
73.6995	0.00474083	73.7032	0.0844647	73.6998	0.249166	73.7036	0.153564
73.7971	0.00385804	73.8008	0.0818764	73.7975	0.247314	73.8013	0.159213
73.8947	0.00236023	73.8985	0.0795828	73.8951	0.245112	73.8989	0.164633
73.9923	0.00136201	73.9961	0.0777545	73.9927	0.242603	73.9965	0.170287
74.0899	0.0007038	74.0937	0.0764806	74.0903	0.240347	74.0941	0.17583
74.1875	0.000606791	74.1913	0.0757721	74.1879	0.238063	74.1917	0.181077
74.2851	0.00110348	74.2889	0.0754923	74.2855	0.235733	74.2893	0.186218
74.3828	0.00127033	74.3866	0.0757563	74.3831	0.233682	74.387	0.191161
74.4804	0.00138044	74.4842	0.0763955	74.4808	0.23161	74.4846	0.195918
74.578	0.00143428	74.5818	0.0774328	74.5784	0.229726	74.5822	0.200739
74.6756	0.00169378	74.6794	0.0787499	74.676	0.227916	74.6798	0.205222
74.7732	0.001881	74.777	0.0801639	74.7736	0.22642	74.7774	0.209567
74.8708	0.00228213	74.8747	0.0816926	74.8712	0.225055	74.8751	0.213426
74.9684	0.00232094	74.9723	0.0832102	74.9688	0.223757	74.9727	0.216816
75.066	0.00241116	75.0699	0.0846273	75.0664	0.2223	75.0703	0.220056
75.1637	0.00232482	75.1675	0.086011	75.1641	0.220796	75.1679	0.223405
75.2613	0.00250768	75.2651	0.0874398	75.2617	0.219449	75.2655	0.22651
75.3589	0.00291754	75.3627	0.0887983	75.3593	0.218163	75.3632	0.229767
75.4565	0.00320614	75.4604	0.0900474	75.4569	0.216721	75.4608	0.23293
75.5541	0.00351366	75.558	0.0911699	75.5545	0.214991	75.5584	0.236127
75.6517	0.00360873	75.6556	0.0920262	75.6521	0.213246	75.656	0.239636
75.7493	0.0038789	75.7532	0.0927527	75.7498	0.211481	75.7536	0.243462
75.847	0.00439984	75.8508	0.0934613	75.8474	0.20995	75.8512	0.247523
75.9446	0.00461277	75.9484	0.0940185	75.945	0.208503	75.9489	0.251509
76.0422	0.00466613	76.0461	0.0947252	76.0426	0.206912	76.0465	0.255421
76.1398	0.00448569	76.1437	0.0953811	76.1402	0.205017	76.1441	0.259228
76.2374	0.00385562	76.2413	0.0959072	76.2378	0.203247	76.2417	0.263014
76.335	0.00338998	76.3389	0.0964306	76.3354	0.201479	76.3393	0.266714
76.4326	0.00273226	76.4365	0.0967031	76.4331	0.199806	76.437	0.270066
76.5303	0.00251884	76.5342	0.0967666	76.5307	0.198206	76.5346	0.272719
76.6279	0.00252369	76.6318	0.096781	76.6283	0.196819	76.6322	0.274624
76.7255	0.00255473	76.7294	0.0968729	76.7259	0.195353	76.7298	0.27584
76.8231	0.00253581	76.827	0.097058	76.8235	0.193943	76.8274	0.276684
76.9207	0.00244851	76.9246	0.0971774	76.9211	0.192525	76.925	0.277134
77.0183	0.00239467	77.0223	0.0970918	77.0188	0.191376	77.0227	0.277459
77.1159	0.00248343	77.1199	0.0967333	77.1164	0.190307	77.1203	0.277331
77.2136	0.00246063	77.2175	0.0961869	77.214	0.189228	77.2179	0.276962
77.3112	0.00223169	77.3151	0.0954671	77.3116	0.188054	77.3155	0.276137
77.4088	0.00219192	77.4127	0.0946243	77.4092	0.186883	77.4131	0.275147
77.5064	0.00163412	77.5103	0.0935996	77.5068	0.185842	77.5108	0.274192
77.604	0.00164285	77.608	0.0925392	77.6044	0.184516	77.6084	0.273294
77.7016	0.0019329	77.7056	0.0911316	77.7021	0.183115	77.706	0.272392
77.7992	0.00217591	77.8032	0.0893722	77.7997	0.181518	77.8036	0.271265
77.8969	0.00253193	77.9008	0.0874443	77.8973	0.180035	77.9012	0.270133
77.9945	0.00265756	77.9984	0.0850119	77.9949	0.17832	77.9989	0.268712
78.0921	0.00301455	78.096	0.0824688	78.0925	0.176968	78.0965	0.267133
78.1897	0.00386581	78.1937	0.0799796	78.1902	0.175511	78.1941	0.265137
78.2873	0.00498432	78.2913	0.0773914	78.2878	0.174165	78.2917	0.262955
78.3849	0.00626047	78.3889	0.0747694	78.3854	0.172936	78.3893	0.260866
78.4825	0.00743282	78.4865	0.0721019	78.483	0.171542	78.4869	0.258895
78.5802	0.00807793	78.5841	0.0693051	78.5806	0.17044	78.5846	0.257219
78.6778	0.00868424	78.6818	0.0664412	78.6782	0.169384	78.6822	0.255557
78.7754	0.00933177	78.7794	0.0633724	78.7758	0.168199	78.7798	0.253872
78.873	0.0102238	78.877	0.060585	78.8735	0.166962	78.8774	0.252254
78.9706	0.0109169	78.9746	0.0584594	78.9711	0.165688	78.975	0.25069
79.0682	0.0112928	79.0722	0.0568685	79.0687	0.16412	79.0727	0.249322
79.1659	0.0116658	79.1698	0.055528	79.1663	0.1626	79.1703	0.248384
79.2635	0.0118986	79.2675	0.0547027	79.2639	0.161172	79.2679	0.248043
79.3611	0.0121184	79.3651	0.0543798	79.3615	0.159553	79.3655	0.248146
79.4587	0.0125908	79.4627	0.0545388	79.4591	0.157784	79.4631	0.248205
79.5563	0.0124574	79.5603	0.0550523	79.5568	0.156041	79.5607	0.248007
79.6539	0.0121256	79.6579	0.0562604	79.6544	0.154172	79.6584	0.247544
79.7515	0.0119796	79.7556	0.0582355	79.752	0.152284	79.756	0.247007
79.8492	0.0118196	79.8532	0.0604995	79.8496	0.150095	79.8536	0.246296
79.9468	0.0118666	79.9508	0.0630201	79.9472	0.147838	79.9512	0.245646
80.0444	0.0115921	80.0484	0.0656466	80.0448	0.145314	80.0488	0.244949
80.142	0.0110231	80.146	0.0681939	80.1425	0.142574	80.1465	0.244124
80.2396	0.0103193	80.2436	0.0704979	80.2401	0.13917	80.2441	0.242822
80.3372	0.00963444	80.3413	0.0726104	80.3377	0.135243	80.3417	0.241097
80.4348	0.00871528	80.4389	0.074618	80.4353	0.131273	80.4393	0.239365
80.5325	0.00821229	80.5365	0.0764941	80.5329	0.126507	80.5369	0.237475
80.6301	0.00743428	80.6341	0.0781008	80.6305	0.121437	80.6346	0.235646
80.7277	0.00656896	80.7317	0.0797013	80.7281	0.116014	80.7322	0.233962
80.8253	0.00567551	80.8294	0.0810251	80.8258	0.110539	80.8298	0.232223
80.9229	0.00516573	80.927	0.0819129	80.9234	0.10481	80.9274	0.230114
81.0205	0.0047253	81.0246	0.0822949	81.021	0.0989047	81.025	0.227791
81.1181	0.00401714	81.1222	0.0826507	81.1186	0.0929331	81.1226	0.225161
81.2158	0.00355198	81.2198	0.0827561	81.2162	0.0869909	81.2203	0.221879
81.3134	0.00313193	81.3174	0.0826093	81.3138	0.0813509	81.3179	0.217978
81.411	0.00304802	81.4151	0.0824751	81.4115	0.0758247	81.4155	0.213837
81.5086	0.00295974	81.5127	0.0822674	81.5091	0.0705712	81.5131	0.209413
81.6062	0.00299079	81.6103	0.0819192	81.6067	0.0656068	81.6107	0.205036
81.7038	0.0028768	81.7079	0.0813044	81.7043	0.0608982	81.7084	0.200638
81.8014	0.00302134	81.8055	0.0805355	81.8019	0.0565043	81.806	0.196201
81.8991	0.00310283	81.9032	0.0798229	81.8995	0.0525635	81.9036	0.191617
81.9967	0.00319887	82.0008	0.0794247	81.9971	0.0490027	82.0012	0.186756
82.0943	0.00329782	82.0984	0.0793436	82.0948	0.045942	82.0988	0.18196
82.1919	0.002919	82.196	0.079944	82.1924	0.0436916	82.1964	0.177661
82.2895	0.0023772	82.2936	0.0811661	82.29	0.0421314	82.2941	0.173712
82.3871	0.0016215	82.3912	0.0829282	82.3876	0.0410078	82.3917	0.16999
82.4847	0.000706225	82.4889	0.0852381	82.4852	0.040609	82.4893	0.166837
82.5824	0	82.5865	0.0881209	82.5828	0.0406478	82.5869	0.163941
82.68	-0.00081536	82.6841	0.0913604	82.6805	0.0413608	82.6845	0.161367
82.7776	-0.00177381	82.7817	0.0951851	82.7781	0.0425721	82.7821	0.159584
82.8752	-0.00298642	82.8793	0.099381	82.8757	0.0441452	82.8798	0.158652
82.9728	-0.00386096	82.9769	0.103871	82.9733	0.0465207	82.9774	0.15858
83.0704	-0.00427906	83.0746	0.108389	83.0709	0.0492447	83.075	0.159176
83.168	-0.00459871	83.1722	0.113022	83.1685	0.052268	83.1726	0.160554
83.2657	-0.00490089	83.2698	0.117634	83.2661	0.055531	83.2702	0.163134
83.3633	-0.00543007	83.3674	0.121924	83.3638	0.0590644	83.3679	0.166807
83.4609	-0.0056532	83.465	0.126138	83.4614	0.0628864	83.4655	0.171647
83.5585	-0.00605578	83.5627	0.130009	83.559	0.0670666	83.5631	0.177393
83.6561	-0.00643994	83.6603	0.13352	83.6566	0.0715363	83.6607	0.183921
83.7537	-0.00703897	83.7579	0.13672	83.7542	0.0762755	83.7583	0.191125
83.8513	-0.00771754	83.8555	0.13958	83.8518	0.0813231	83.856	0.199227
83.949	-0.00848634	83.9531	0.141909	83.9495	0.0863601	83.9536	0.20837
84.0466	-0.00962814	84.0507	0.143737	84.0471	0.0913144	84.0512	0.218245
84.1442	-0.0105526	84.1484	0.144824	84.1447	0.0960938	84.1488	0.22856
84.2418	-0.0115591	84.246	0.145348	84.2423	0.100765	84.2464	0.239024
84.3394	-0.0122357	84.3436	0.145176	84.3399	0.105365	84.344	0.249326
84.437	-0.0132	84.4412	0.144465	84.4375	0.109864	84.4417	0.259205
84.5346	-0.0142113	84.5388	0.143141	84.5351	0.114438	84.5393	0.269004
84.6323	-0.0151785	84.6365	0.141456	84.6328	0.118789	84.6369	0.278416
84.7299	-0.0161326	84.7341	0.139233	84.7304	0.122869	84.7345	0.286857
84.8275	-0.0170731	84.8317	0.136538	84.828	0.126943	84.8321	0.294355
84.9251	-0.0182396	84.9293	0.133655	84.9256	0.13074	84.9298	0.300717
85.0227	-0.0195517	85.0269	0.130586	85.0232	0.134584	85.0274	0.306235
85.1203	-0.0210408	85.1245	0.127267	85.1208	0.138331	85.125	0.310859
85.2179	-0.0225148	85.2222	0.123749	85.2185	0.142023	85.2226	0.314293
85.3156	-0.023937	85.3198	0.120256	85.3161	0.1457	85.3202	0.316414
85.4132	-0.0254309	85.4174	0.116503	85.4137	0.149152	85.4178	0.317345
85.5108	-0.0268884	85.515	0.112845	85.5113	0.15214	85.5155	0.317007
85.6084	-0.0283237	85.6126	0.109299	85.6089	0.154729	85.6131	0.315699
85.706	-0.0299903	85.7102	0.105984	85.7065	0.157043	85.7107	0.313639
85.8036	-0.031589	85.8079	0.103007	85.8042	0.158883	85.8083	0.310705
85.9012	-0.0331252	85.9055	0.100065	85.9018	0.160578	85.9059	0.306914
85.9989	-0.0341622	86.0031	0.097358	85.9994	0.162088	86.0035	0.302439
86.0965	-0.0352695	86.1007	0.0949189	86.097	0.163641	86.1012	0.297587
86.1941	-0.0364788	86.1983	0.0928807	86.1946	0.165129	86.1988	0.292483
86.2917	-0.0378073	86.2959	0.0912514	86.2922	0.166556	86.2964	0.287504
86.3893	-0.0388409	86.3936	0.0899848	86.3898	0.168103	86.394	0.28254
86.4869	-0.0397717	86.4912	0.0891046	86.4875	0.16965	86.4917	0.277618
86.5845	-0.0407719	86.5888	0.0882929	86.5851	0.171439	86.5893	0.272759
86.6822	-0.0415868	86.6864	0.08742	86.6827	0.173485	86.6869	0.268397
86.7798	-0.0421935	86.784	0.0865214	86.7803	0.175608	86.7845	0.264388
86.8774	-0.0426136	86.8817	0.0857889	86.8779	0.177717	86.8821	0.260727
86.975	-0.0431835	86.9793	0.0852223	86.9755	0.179635	86.9797	0.257297
87.0726	-0.0434372	87.0769	0.0846993	87.0732	0.181479	87.0774	0.254261
87.1702	-0.0437282	87.1745	0.0841786	87.1708	0.183264	87.175	0.251595
87.2678	-0.0439072	87.2721	0.0835584	87.2684	0.184941	87.2726	0.249269
87.3655	-0.0441856	87.3698	0.0829859	87.366	0.186553	87.3702	0.247145
87.4631	-0.0444767	87.4674	0.0822134	87.4636	0.188168	87.4678	0.245268
87.5607	-0.0448676	87.565	0.0814683	87.5612	0.189856	87.5654	0.243628
87.6583	-0.0451538	87.6626	0.0807755	87.6588	0.191618	87.6631	0.24189
87.7559	-0.0454647	87.7602	0.0800048	87.7565	0.193416	87.7607	0.240128
87.8535	-0.0457038	87.8578	0.0793391	87.8541	0.195386	87.8583	0.238606
87.9511	-0.0463096	87.9555	0.0785756	87.9517	0.197502	87.9559	0.237239
88.0487	-0.0468718	88.0531	0.0781292	88.0493	0.199406	88.0535	0.235822
88.1464	-0.0472307	88.1507	0.0776891	88.1469	0.201045	88.1512	0.234488
88.244	-0.0475863	88.2483	0.0775716	88.2445	0.202555	88.2488	0.233059
88.3416	-0.0479564	88.3459	0.077954	88.3422	0.203703	88.3464	0.231468
88.4392	-0.0481814	88.4435	0.0787504	88.4398	0.204563	88.444	0.229738
88.5368	-0.0481955	88.5412	0.0801247	88.5374	0.204987	88.5416	0.228043
88.6344	-0.0480771	88.6388	0.082221	88.635	0.204899	88.6392	0.226305
88.732	-0.0479564	88.7364	0.0850714	88.7326	0.204474	88.7369	0.22467
88.8297	-0.0476183	88.834	0.0885132	88.8302	0.203619	88.8345	0.222774
88.9273	-0.0468485	88.9316	0.092546	88.9278	0.202221	88.9321	0.220598
89.0249	-0.0462049	89.0292	0.0968702	89.0255	0.200432	89.0297	0.217897
89.1225	-0.0453691	89.1269	0.101537	89.1231	0.198283	89.1273	0.214767
89.2201	-0.0446537	89.2245	0.106377	89.2207	0.195629	89.2249	0.21133
89.3177	-0.0437156	89.3221	0.111223	89.3183	0.19256	89.3226	0.207775
89.4153	-0.0430167	89.4197	0.116203	89.4159	0.189263	89.4202	0.204052
89.513	-0.0422469	89.5173	0.121197	89.5135	0.185798	89.5178	0.19988
89.6106	-0.0417163	89.6149	0.125983	89.6111	0.181973	89.6154	0.195768
89.7082	-0.0411939	89.7126	0.130506	89.7088	0.17781	89.713	0.191768
89.8058	-0.0408577	89.8102	0.134775	89.8064	0.173156	89.8107	0.18779
89.9034	-0.0404391	89.9078	0.138757	89.904	0.16826	89.9083	0.183826
90.001	-0.0401049	90.0054	0.142299	90.0016	0.163285	90.0059	0.179757
90.0986	-0.0398653	90.103	0.145542	90.0992	0.158213	90.1035	0.175596
90.1963	-0.039715	90.2007	0.148312	90.1968	0.153086	90.2011	0.171434
90.2939	-0.0394972	90.2983	0.150379	90.2945	0.148137	90.2988	0.167645
90.3915	-0.0392149	90.3959	0.152096	90.3921	0.143138	90.3964	0.164036
90.4891	-0.0390097	90.4935	0.153262	90.4897	0.138007	90.494	0.160641
90.5867	-0.0389869	90.5911	0.153867	90.5873	0.132791	90.5916	0.157154
90.6843	-0.0390965	90.6887	0.153915	90.6849	0.127773	90.6892	0.153276
90.7819	-0.039406	90.7864	0.153233	90.7825	0.122985	90.7868	0.149404
90.8796	-0.0397935	90.884	0.151803	90.8801	0.118484	90.8845	0.14558
90.9772	-0.0400952	90.9816	0.149988	90.9778	0.113945	90.9821	0.142044
91.0748	-0.0406283	91.0792	0.147858	91.0754	0.109481	91.0797	0.138659
91.1724	-0.0410828	91.1768	0.14543	91.173	0.105209	91.1773	0.135349
91.27	-0.0417526	91.2745	0.142928	91.2706	0.101073	91.2749	0.131862
91.3676	-0.0422547	91.3721	0.140188	91.3682	0.0970279	91.3725	0.128257
91.4652	-0.0428217	91.4697	0.137252	91.4658	0.0928989	91.4702	0.124661
91.5628	-0.0430419	91.5673	0.134468	91.5635	0.0888279	91.5678	0.120913
91.6605	-0.043395	91.6649	0.13189	91.6611	0.0846441	91.6654	0.117009
91.7581	-0.0436977	91.7625	0.129721	91.7587	0.0806188	91.763	0.112885
91.8557	-0.0440745	91.8602	0.128104	91.8563	0.0766898	91.8606	0.108832
91.9533	-0.0441492	91.9578	0.126816	91.9539	0.0729148	91.9583	0.104906
92.0509	-0.0442307	92.0554	0.125805	92.0515	0.0692745	92.0559	0.101098
92.1485	-0.044239	92.153	0.125252	92.1491	0.0656785	92.1535	0.0972572
92.2461	-0.0441895	92.2506	0.125147	92.2468	0.0618743	92.2511	0.0931278
92.3438	-0.0442724	92.3483	0.125271	92.3444	0.0579618	92.3487	0.0887934
92.4414	-0.0441405	92.4459	0.125708	92.442	0.0541087	92.4463	0.0842954
92.539	-0.0439164	92.5435	0.126565	92.5396	0.0504277	92.544	0.0796024
92.6366	-0.0436555	92.6411	0.127822	92.6372	0.0467267	92.6416	0.0750367
92.7342	-0.0433203	92.7387	0.129359	92.7348	0.0429065	92.7392	0.0705429
92.8318	-0.0429085	92.8363	0.131217	92.8325	0.0390026	92.8368	0.0657701
92.9294	-0.0428003	92.934	0.133276	92.9301	0.0351723	92.9344	0.06073
93.0271	-0.042551	93.0316	0.13549	93.0277	0.0314151	93.0321	0.0555724
93.1247	-0.0425864	93.1292	0.137932	93.1253	0.0276424	93.1297	0.0503895
93.2223	-0.0424909	93.2268	0.14059	93.2229	0.0239235	93.2273	0.0454251
93.3199	-0.0423415	93.3244	0.14352	93.3205	0.0203984	93.3249	0.040791
93.4175	-0.0422867	93.422	0.146657	93.4182	0.0171244	93.4225	0.0363534
93.5151	-0.0423303	93.5197	0.149594	93.5158	0.0139409	93.5201	0.0323174
93.6127	-0.0424652	93.6173	0.15216	93.6134	0.0109327	93.6178	0.0286138
93.7104	-0.0425471	93.7149	0.154118	93.711	0.00811093	93.7154	0.0252577
93.808	-0.0424671	93.8125	0.155558	93.8086	0.00528777	93.813	0.022004
93.9056	-0.0424521	93.9101	0.156615	93.9062	0.0024573	93.9106	0.0191759
94.0032	-0.042373	94.0077	0.157048	94.0038	-0.000384125	94.0082	0.0165242
94.1008	-0.0420631	94.1054	0.156799	94.1015	-0.00314151	94.1059	0.0140577
94.1984	-0.0420325	94.203	0.155688	94.1991	-0.00574589	94.2035	0.0117581
94.296	-0.0418928	94.3006	0.153777	94.2967	-0.00808124	94.3011	0.00956641
94.3937	-0.0418186	94.3982	0.151199	94.3943	-0.0102293	94.3987	0.00736834
94.4913	-0.0416697	94.4958	0.147963	94.4919	-0.0121404	94.4963	0.00524848
94.5889	-0.0413219	94.5934	0.144206	94.5895	-0.0140464	94.5939	0.0031578
94.6865	-0.0410464	94.6911	0.140292	94.6872	-0.0158441	94.6916	0.00117831
94.7841	-0.0411425	94.7887	0.136052	94.7848	-0.0173998	94.7892	-0.000524256
94.8817	-0.0411163	94.8863	0.131803	94.8824	-0.0186435	94.8868	-0.00224669
94.9793	-0.0411531	94.9839	0.127581	94.98	-0.0199115	94.9844	-0.00399238
95.077	-0.0412108	95.0815	0.123498	95.0776	-0.0209871	95.082	-0.00560532
95.1746	-0.0414049	95.1792	0.119571	95.1752	-0.022071	95.1796	-0.00709606
95.2722	-0.041853	95.2768	0.115858	95.2728	-0.0233608	95.2773	-0.00861302
95.3698	-0.0422319	95.3744	0.11223	95.3705	-0.0249101	95.3749	-0.0100103
95.4674	-0.0428353	95.472	0.108903	95.4681	-0.0266065	95.4725	-0.011515
95.565	-0.0432859	95.5696	0.106229	95.5657	-0.0280854	95.5701	-0.012898
95.6626	-0.043881	95.6672	0.104268	95.6633	-0.0295671	95.6677	-0.0144052
95.7603	-0.0444044	95.7649	0.103027	95.7609	-0.0310342	95.7654	-0.0158592
95.8579	-0.0451911	95.8625	0.102197	95.8585	-0.0325332	95.863	-0.0174252
95.9555	-0.046039	95.9601	0.102189	95.9562	-0.0338373	95.9606	-0.0188969
96.0531	-0.0469247	96.0577	0.102904	96.0538	-0.0352194	96.0582	-0.0203953
96.1507	-0.0476561	96.1553	0.104421	96.1514	-0.0365088	96.1558	-0.0218357
96.2483	-0.0480951	96.2529	0.106715	96.249	-0.0377671	96.2534	-0.0230559
96.3459	-0.048731	96.3506	0.109959	96.3466	-0.038972	96.3511	-0.0240401
96.4436	-0.0492519	96.4482	0.114046	96.4442	-0.0401929	96.4487	-0.0247457
96.5412	-0.0498403	96.5458	0.118686	96.5418	-0.0414768	96.5463	-0.0254915
96.6388	-0.0505067	96.6434	0.123705	96.6395	-0.042795	96.6439	-0.0261084
96.7364	-0.0510165	96.741	0.129112	96.7371	-0.044194	96.7415	-0.0266124
96.834	-0.0511698	96.8386	0.134691	96.8347	-0.0456912	96.8392	-0.0269916
96.9316	-0.0511407	96.9363	0.140589	96.9323	-0.0470213	96.9368	-0.0272372
97.0292	-0.0509219	97.0339	0.146402	97.0299	-0.0483874	97.0344	-0.0271446
97.1269	-0.0506513	97.1315	0.15219	97.1275	-0.0495878	97.132	-0.0269721
97.2245	-0.0503093	97.2291	0.157904	97.2251	-0.0507347	97.2296	-0.0266145
97.3221	-0.0497792	97.3267	0.163452	97.3228	-0.0518185	97.3272	-0.0259972
97.4197	-0.0491709	97.4243	0.168633	97.4204	-0.0526795	97.4249	-0.0252971
97.5173	-0.048762	97.522	0.173256	97.518	-0.0534724	97.5225	-0.0246265
97.6149	-0.0483803	97.6196	0.177303	97.6156	-0.054327	97.6201	-0.0239327
97.7125	-0.0480165	97.7172	0.180551	97.7132	-0.0551098	97.7177	-0.0233324
97.8102	-0.0476338	97.8148	0.183294	97.8108	-0.0558612	97.8153	-0.0225282
97.9078	-0.0473142	97.9124	0.18525	97.9085	-0.056719	97.9129	-0.0215203
98.0054	-0.0472002	98.0101	0.186534	98.0061	-0.0576037	98.0106	-0.0203365
98.103	-0.0471939	98.1077	0.187096	98.1037	-0.0586314	98.1082	-0.0189261
98.2006	-0.0477817	98.2053	0.187159	98.2013	-0.059681	98.2058	-0.0175744
98.2982	-0.0481955	98.3029	0.186506	98.2989	-0.0605333	98.3034	-0.0160997
98.3958	-0.0488838	98.4005	0.185214	98.3965	-0.0614696	98.401	-0.014226
98.4935	-0.0497093	98.4981	0.183495	98.4941	-0.0623027	98.4987	-0.0115886
98.5911	-0.0503142	98.5958	0.181399	98.5918	-0.0630025	98.5963	-0.00846378
98.6887	-0.0510936	98.6934	0.179159	98.6894	-0.0634925	98.6939	-0.00460331
98.7863	-0.0519226	98.791	0.176711	98.787	-0.0638356	98.7915	-0.00037163
98.8839	-0.0528505	98.8886	0.173748	98.8846	-0.0641128	98.8891	0.0041281
98.9815	-0.0536275	98.9862	0.170641	98.9822	-0.0640685	98.9867	0.00867095
99.0791	-0.0543337	99.0838	0.167445	99.0798	-0.0637785	99.0844	0.0134218
99.1768	-0.054471	99.1815	0.163926	99.1775	-0.0632893	99.182	0.0184196
99.2744	-0.0547286	99.2791	0.160253	99.2751	-0.062653	99.2796	0.0235776
99.372	-0.0545374	99.3767	0.156604	99.3727	-0.0621433	99.3772	0.0290151
99.4696	-0.0538332	99.4743	0.153097	99.4703	-0.0615801	99.4748	0.0345062
99.5672	-0.0527758	99.5719	0.149798	99.5679	-0.0608311	99.5725	0.0402079
99.6648	-0.051551	99.6695	0.146838	99.6655	-0.060056	99.6701	0.0460238
99.7624	-0.0502637	99.7672	0.144148	99.7631	-0.0591744	99.7677	0.0518583
99.8601	-0.0486999	99.8648	0.141834	99.8608	-0.0582769	99.8653	0.05782
99.9577	-0.0469703	99.9624	0.139816	99.9584	-0.0572415	99.9629	0.0638244
100.055	-0.044903	100.06	0.138362	100.056	-0.056191	100.061	0.0698136
100.153	-0.0428784	100.158	0.137331	100.154	-0.0550678	100.158	0.0758392
100.25	-0.0408301	100.255	0.136757	100.251	-0.0541817	100.256	0.0815658
100.348	-0.038856	100.353	0.136507	100.349	-0.0531002	100.353	0.0867944
100.446	-0.036764	100.45	0.136378	100.446	-0.0520405	100.451	0.0914553
100.543	-0.0347879	100.548	0.136261	100.544	-0.050853	100.549	0.0955576
100.641	-0.0325184	100.646	0.135906	100.642	-0.04968	100.646	0.0989086
100.739	-0.0303342	100.743	0.135495	100.739	-0.0486697	100.744	0.102248
100.836	-0.0282713	100.841	0.135277	100.837	-0.0477096	100.841	0.105524
100.934	-0.0263952	100.939	0.135002	100.935	-0.0470688	100.939	0.108968
101.031	-0.0245219	101.036	0.134476	101.032	-0.0467737	101.037	0.11227
101.129	-0.0228606	101.134	0.133959	101.13	-0.0464901	101.134	0.115457
101.227	-0.0212144	101.231	0.133532	101.227	-0.0461028	101.232	0.118543
101.324	-0.0198053	101.329	0.133245	101.325	-0.0455428	101.33	0.121411
101.422	-0.0188915	101.427	0.133028	101.423	-0.0450902	101.427	0.124125
101.519	-0.0182459	101.524	0.133017	101.52	-0.0449029	101.525	0.126728
101.617	-0.0181824	101.622	0.133216	101.618	-0.0449897	101.622	0.129242
101.715	-0.0181392	101.72	0.133701	101.715	-0.0451993	101.72	0.131343
101.812	-0.018389	101.817	0.134261	101.813	-0.0454875	101.818	0.132824
101.91	-0.018826	101.915	0.134879	101.911	-0.0458497	101.915	0.133756
102.008	-0.0197326	102.012	0.135363	102.008	-0.0459881	102.013	0.134471
102.105	-0.0208346	102.11	0.135498	102.106	-0.04628	102.111	0.134967
102.203	-0.022118	102.208	0.13517	102.204	-0.0465431	102.208	0.135423
102.3	-0.0234825	102.305	0.134358	102.301	-0.047135	102.306	0.136148
102.398	-0.0251176	102.403	0.13338	102.399	-0.0478768	102.403	0.137093
102.496	-0.0270427	102.5	0.132242	102.496	-0.0486747	102.501	0.1384
102.593	-0.0292171	102.598	0.131126	102.594	-0.0494823	102.599	0.14019
102.691	-0.0315788	102.696	0.129925	102.692	-0.0501212	102.696	0.141865
102.788	-0.0337795	102.793	0.128669	102.789	-0.0506186	102.794	0.14376
102.886	-0.0358375	102.891	0.127765	102.887	-0.0510087	102.891	0.145459
102.984	-0.0378044	102.989	0.127194	102.984	-0.0512531	102.989	0.147089
103.081	-0.039503	103.086	0.127316	103.082	-0.0513814	103.087	0.148589
103.179	-0.0409984	103.184	0.128023	103.18	-0.0514988	103.184	0.149853
103.277	-0.0423124	103.281	0.129213	103.277	-0.0513325	103.282	0.15083
103.374	-0.0430186	103.379	0.130888	103.375	-0.0508813	103.38	0.151792
103.472	-0.0434983	103.477	0.1328	103.473	-0.0503017	103.477	0.152373
103.569	-0.0431481	103.574	0.134898	103.57	-0.0493448	103.575	0.152588
103.667	-0.0426907	103.672	0.136967	103.668	-0.0482408	103.672	0.15251
103.765	-0.0420665	103.769	0.139185	103.765	-0.0470039	103.77	0.152244
103.862	-0.0415106	103.867	0.141413	103.863	-0.0456693	103.868	0.151886
103.96	-0.0407573	103.965	0.14373	103.961	-0.0443694	103.965	0.151018
104.057	-0.0399541	104.062	0.145922	104.058	-0.0431293	104.063	0.150073
104.155	-0.0392799	104.16	0.148053	104.156	-0.0418322	104.16	0.14899
104.253	-0.0385266	104.258	0.150247	104.253	-0.0404158	104.258	0.147338
104.35	-0.0379382	104.355	0.152213	104.351	-0.038782	104.356	0.145126
104.448	-0.0373732	104.453	0.154058	104.449	-0.0371149	104.453	0.142443
104.546	-0.0371132	104.55	0.155814	104.546	-0.0356556	104.551	0.139326
104.643	-0.0371195	104.648	0.157378	104.644	-0.0343315	104.649	0.136524
104.741	-0.0374571	104.746	0.158762	104.742	-0.0330964	104.746	0.133564
104.838	-0.0377035	104.843	0.159838	104.839	-0.0317184	104.844	0.130871
104.936	-0.0381808	104.941	0.160557	104.937	-0.0302239	104.941	0.128644
105.034	-0.0389132	105.038	0.160765	105.034	-0.0285673	105.039	0.126694
105.131	-0.0400026	105.136	0.160444	105.132	-0.0268161	105.137	0.124984
105.229	-0.0413918	105.234	0.159739	105.23	-0.025218	105.234	0.123743
105.326	-0.0430671	105.331	0.158645	105.327	-0.0238829	105.332	0.122636
105.424	-0.0446755	105.429	0.157129	105.425	-0.0224848	105.43	0.121843
105.522	-0.0464207	105.527	0.155108	105.522	-0.0209976	105.527	0.121534
105.619	-0.0479471	105.624	0.152923	105.62	-0.019478	105.625	0.121272
105.717	-0.0493955	105.722	0.150492	105.718	-0.017989	105.722	0.121254
105.814	-0.0508303	105.819	0.147775	105.815	-0.0163708	105.82	0.121385
105.912	-0.0521263	105.917	0.145056	105.913	-0.014615	105.918	0.12182
106.01	-0.0532016	106.015	0.142606	106.011	-0.0124418	106.015	0.122
106.107	-0.0539137	106.112	0.140649	106.108	-0.00999913	106.113	0.122041
106.205	-0.0545384	106.21	0.139138	106.206	-0.0071513	106.21	0.122256
106.303	-0.0547252	106.308	0.137994	106.303	-0.00392255	106.308	0.122791
106.4	-0.0546907	106.405	0.137406	106.401	-0.000190007	106.406	0.123593
106.498	-0.054634	106.503	0.137273	106.499	0.00440214	106.503	0.12424
106.595	-0.0543507	106.6	0.137676	106.596	0.00987718	106.601	0.124398
106.693	-0.0537158	106.698	0.138445	106.694	0.0161223	106.699	0.124007
106.791	-0.05311	106.796	0.139748	106.791	0.0230365	106.796	0.122761
106.888	-0.05238	106.893	0.141366	106.889	0.0305039	106.894	0.120637
106.986	-0.0517708	106.991	0.142996	106.987	0.0383033	106.991	0.117918
107.083	-0.0509544	107.088	0.144623	107.084	0.0463732	107.089	0.115067
107.181	-0.0500484	107.186	0.146215	107.182	0.0546389	107.187	0.111774
107.279	-0.0493387	107.284	0.147825	107.28	0.0634382	107.284	0.108197
107.376	-0.048893	107.381	0.149349	107.377	0.0726321	107.382	0.104345
107.474	-0.0488382	107.479	0.150921	107.475	0.0819347	107.479	0.100418
107.572	-0.0489725	107.577	0.152449	107.572	0.0913519	107.577	0.0968762
107.669	-0.0494115	107.674	0.154038	107.67	0.101061	107.675	0.0936351
107.767	-0.0496026	107.772	0.15568	107.768	0.110908	107.772	0.0908037
107.864	-0.0500338	107.869	0.157395	107.865	0.120859	107.87	0.0886365
107.962	-0.0504519	107.967	0.159165	107.963	0.130888	107.968	0.0872942
108.06	-0.0510961	108.065	0.160711	108.06	0.141087	108.065	0.0864807
108.157	-0.0516383	108.162	0.161939	108.158	0.151376	108.163	0.0860584
108.255	-0.0522078	108.26	0.163089	108.256	0.161367	108.26	0.0857468
108.352	-0.052653	108.357	0.163941	108.353	0.171	108.358	0.0853244
108.45	-0.0527277	108.455	0.164452	108.451	0.180096	108.456	0.0848657
108.548	-0.0527535	108.553	0.164588	108.549	0.188571	108.553	0.0845465
108.645	-0.052639	108.65	0.164237	108.646	0.196338	108.651	0.0846649
108.743	-0.052864	108.748	0.163078	108.744	0.203307	108.749	0.0851794
108.841	-0.0530227	108.846	0.161232	108.841	0.209595	108.846	0.0857929
108.938	-0.0533845	108.943	0.158831	108.939	0.215205	108.944	0.0864938
109.036	-0.0540175	109.041	0.15605	109.037	0.220592	109.041	0.087008
109.133	-0.0548547	109.138	0.152944	109.134	0.226097	109.139	0.08767
109.231	-0.0556657	109.236	0.149464	109.232	0.231337	109.237	0.0887414
109.329	-0.056578	109.334	0.145929	109.329	0.236326	109.334	0.0903226
109.426	-0.0575564	109.431	0.142192	109.427	0.241279	109.432	0.0919804
109.524	-0.0590377	109.529	0.138349	109.525	0.246296	109.529	0.0936381
109.621	-0.0604875	109.627	0.134515	109.622	0.25141	109.627	0.0952988
109.719	-0.0621158	109.724	0.130806	109.72	0.2565	109.725	0.096976
109.817	-0.0637674	109.822	0.126988	109.818	0.261699	109.822	0.0984503
109.914	-0.0653763	109.919	0.123216	109.915	0.266948	109.92	0.0996704
110.012	-0.0669619	110.017	0.119335	110.013	0.272103	110.018	0.10079
110.11	-0.0687881	110.115	0.115377	110.11	0.277088	110.115	0.101674
110.207	-0.0706681	110.212	0.111237	110.208	0.282531	110.213	0.102274
110.305	-0.0725331	110.31	0.107039	110.306	0.288256	110.31	0.102788
110.402	-0.0743632	110.407	0.102859	110.403	0.29424	110.408	0.103675
110.5	-0.0757281	110.505	0.0986449	110.501	0.300489	110.506	0.104696
110.598	-0.0774558	110.603	0.0946081	110.598	0.30698	110.603	0.105676
110.695	-0.0786694	110.7	0.0909217	110.696	0.313921	110.701	0.106777
110.793	-0.0798015	110.798	0.0877132	110.794	0.321093	110.798	0.107884
110.89	-0.0804553	110.896	0.084961	110.891	0.328512	110.896	0.108986
110.988	-0.0807022	110.993	0.0827561	110.989	0.335797	110.994	0.110082
111.086	-0.0804878	111.091	0.0810003	111.087	0.342609	111.091	0.111059
111.183	-0.0798214	111.188	0.0796535	111.184	0.349129	111.189	0.111647
111.281	-0.0788901	111.286	0.0785639	111.282	0.355266	111.287	0.111923
111.378	-0.0776925	111.384	0.077958	111.379	0.360968	111.384	0.111706
111.476	-0.0762476	111.481	0.0775202	111.477	0.36615	111.482	0.111031
111.574	-0.0746348	111.579	0.0769878	111.575	0.370801	111.579	0.109845
111.671	-0.0731549	111.676	0.0764441	111.672	0.374875	111.677	0.10821
111.769	-0.0714151	111.774	0.075891	111.77	0.378263	111.775	0.106129
111.867	-0.0696946	111.872	0.0751707	111.867	0.380937	111.872	0.10371
111.964	-0.0680299	111.969	0.074577	111.965	0.382784	111.97	0.100984
112.062	-0.0663216	112.067	0.0741599	112.063	0.383993	112.068	0.0980321
112.159	-0.0647733	112.165	0.0742158	112.16	0.384202	112.165	0.0950676
112.257	-0.0633148	112.262	0.0744514	112.258	0.383684	112.263	0.0916781
112.355	-0.0618529	112.36	0.0747924	112.356	0.382315	112.36	0.088018
112.452	-0.0608183	112.457	0.075623	112.453	0.380242	112.458	0.0840709
112.55	-0.0596241	112.555	0.0769783	112.551	0.377397	112.556	0.0798624
112.647	-0.0587767	112.653	0.0786824	112.648	0.374119	112.653	0.0754215
112.745	-0.0580307	112.75	0.0806274	112.746	0.370581	112.751	0.0710291
112.843	-0.0576825	112.848	0.0828093	112.844	0.367054	112.848	0.066545
112.94	-0.0574109	112.945	0.0849169	112.941	0.363689	112.946	0.0620504
113.038	-0.057421	113.043	0.0868087	113.039	0.360585	113.044	0.0575012
113.136	-0.0578838	113.141	0.0883862	113.136	0.357898	113.141	0.0528975
113.233	-0.0583247	113.238	0.0898123	113.234	0.35545	113.239	0.0484417
113.331	-0.0588175	113.336	0.0910375	113.332	0.35328	113.337	0.0440646
113.428	-0.0588767	113.434	0.0919586	113.429	0.351436	113.434	0.0400287
113.526	-0.0589286	113.531	0.092614	113.527	0.349991	113.532	0.0363441
113.624	-0.0586768	113.629	0.0929262	113.625	0.348813	113.629	0.0328041
113.721	-0.0585885	113.726	0.0930023	113.722	0.347989	113.727	0.0296086
113.819	-0.0583989	113.824	0.0929068	113.82	0.347372	113.825	0.0267438
113.916	-0.0580031	113.922	0.0928009	113.917	0.347021	113.922	0.0241771
114.014	-0.0572197	114.019	0.0926473	114.015	0.347074	114.02	0.0220568
114.112	-0.056288	114.117	0.0921906	114.113	0.347212	114.117	0.0203513
114.209	-0.0552752	114.215	0.0918041	114.21	0.347493	114.215	0.0193806
114.307	-0.054324	114.312	0.0915136	114.308	0.348089	114.313	0.0189193
114.405	-0.0534723	114.41	0.0910465	114.405	0.348771	114.41	0.0186069
114.502	-0.0526414	114.507	0.0905059	114.503	0.349763	114.508	0.0187578
114.6	-0.0518251	114.605	0.0900172	114.601	0.35065	114.606	0.0192047
114.697	-0.0509864	114.703	0.0896704	114.698	0.351477	114.703	0.0200283
114.795	-0.0499509	114.8	0.0894807	114.796	0.352232	114.801	0.0211711
114.893	-0.0491345	114.898	0.0894136	114.894	0.352855	114.898	0.0226601
114.99	-0.0483604	114.995	0.0896979	114.991	0.353132	114.996	0.0245191
115.088	-0.0475732	115.093	0.0905109	115.089	0.352901	115.094	0.0265637
115.185	-0.0469387	115.191	0.0914663	115.186	0.352486	115.191	0.0284807
115.283	-0.0463033	115.288	0.0924906	115.284	0.351884	115.289	0.0306825
115.381	-0.0459415	115.386	0.0937559	115.382	0.351049	115.386	0.0331634
115.478	-0.0456311	115.484	0.0951446	115.479	0.349818	115.484	0.0356177
115.576	-0.0453633	115.581	0.0967549	115.577	0.348338	115.582	0.0382301
115.673	-0.0450417	115.679	0.098458	115.674	0.34634	115.679	0.040706
115.771	-0.0447997	115.776	0.100235	115.772	0.343833	115.777	0.0432051
115.869	-0.0445795	115.874	0.101943	115.87	0.34106	115.875	0.045604
115.966	-0.0448564	115.972	0.103783	115.967	0.337682	115.972	0.047876
116.064	-0.0451518	116.069	0.10567	116.065	0.334504	116.07	0.0500834
116.162	-0.0456141	116.167	0.107525	116.163	0.331181	116.167	0.0523246
116.259	-0.0460395	116.264	0.109481	116.26	0.327554	116.265	0.0542762
116.357	-0.0463737	116.362	0.111716	116.358	0.323675	116.363	0.0562946
116.454	-0.0468461	116.46	0.114098	116.455	0.319413	116.46	0.0581633
116.552	-0.0475882	116.557	0.116438	116.553	0.314682	116.558	0.0598557
116.65	-0.0483754	116.655	0.118953	116.651	0.3097	116.656	0.0612949
116.747	-0.0492582	116.753	0.121545	116.748	0.304421	116.753	0.0626254
116.845	-0.0501347	116.85	0.124197	116.846	0.298883	116.851	0.0636219
116.942	-0.0509471	116.948	0.126688	116.943	0.293502	116.948	0.0642578
117.04	-0.0518037	117.045	0.128978	117.041	0.287738	117.046	0.0647862
117.138	-0.05238	117.143	0.131164	117.139	0.28184	117.144	0.0651198
117.235	-0.0530163	117.241	0.133267	117.236	0.275801	117.241	0.0653084
117.333	-0.0533903	117.338	0.135143	117.334	0.269786	117.339	0.0651684
117.431	-0.0535538	117.436	0.137065	117.432	0.263798	117.436	0.0648818
117.528	-0.0534136	117.533	0.139205	117.529	0.258312	117.534	0.0645326
117.626	-0.0533423	117.631	0.141305	117.627	0.253239	117.632	0.0641411
117.723	-0.0530552	117.729	0.143394	117.724	0.248943	117.729	0.0635247
117.821	-0.0527079	117.826	0.14558	117.822	0.244999	117.827	0.0628478
117.919	-0.0519779	117.924	0.147622	117.92	0.241434	117.925	0.0620753
118.016	-0.0508986	118.022	0.149589	118.017	0.238013	118.022	0.061042
118.114	-0.0498476	118.119	0.151426	118.115	0.234717	118.12	0.0596029
118.211	-0.0486893	118.217	0.152797	118.212	0.231728	118.217	0.0579033
118.309	-0.0475256	118.314	0.153608	118.31	0.229104	118.315	0.0559031
118.407	-0.0464653	118.412	0.153819	118.408	0.226789	118.413	0.0537367
118.504	-0.0449908	118.51	0.153375	118.505	0.224715	118.51	0.0513053
118.602	-0.0431699	118.607	0.152156	118.603	0.222704	118.608	0.0486721
118.7	-0.0414563	118.705	0.150436	118.701	0.22035	118.705	0.045891
118.797	-0.0395214	118.803	0.148149	118.798	0.217745	118.803	0.0431412
118.895	-0.0374721	118.9	0.145341	118.896	0.21466	118.901	0.0403521
118.992	-0.0353598	118.998	0.142066	118.993	0.211709	118.998	0.0374129
119.09	-0.0333066	119.095	0.138372	119.091	0.208743	119.096	0.0345988
119.188	-0.0313872	119.193	0.134359	119.189	0.205681	119.194	0.0317627
119.285	-0.0295901	119.291	0.130017	119.286	0.202296	119.291	0.02884
119.383	-0.0277795	119.388	0.125419	119.384	0.198766	119.389	0.0258674
119.48	-0.0264286	119.486	0.12042	119.481	0.194575	119.486	0.0228681
119.578	-0.0252965	119.583	0.115272	119.579	0.19004	119.584	0.0198418
119.676	-0.0242241	119.681	0.110006	119.677	0.185006	119.682	0.0166143
119.773	-0.023515	119.779	0.104538	119.774	0.179863	119.779	0.0131538
119.871	-0.0230905	119.876	0.0990963	119.872	0.174546	119.877	0.00950257
119.969	-0.0229751	119.974	0.0936635	119.97	0.168846	119.975	0.00592029
120.066	-0.023026	120.072	0.0882483	120.067	0.162887	120.072	0.0022395
120.164	-0.023125	120.169	0.0832183	120.165	0.15681	120.17	-0.00140873
120.261	-0.0234344	120.267	0.0785315	120.262	0.150529	120.267	-0.00480836
120.359	-0.023401	120.364	0.0740343	120.36	0.144137	120.365	-0.00810483
120.457	-0.0231749	120.462	0.0698186	120.458	0.137935	120.463	-0.0112149
120.554	-0.0232948	120.56	0.0658471	120.555	0.131886	120.56	-0.0142606
120.652	-0.0235363	120.657	0.0618048	120.653	0.126259	120.658	-0.0170836
120.749	-0.0237066	120.755	0.057918	120.75	0.120908	120.755	-0.019879
120.847	-0.0239758	120.852	0.0542289	120.848	0.11603	120.853	-0.0223701
120.945	-0.023985	120.95	0.050674	120.946	0.111522	120.951	-0.0247665
121.042	-0.0240922	121.048	0.0472619	121.043	0.107243	121.048	-0.0272102
121.14	-0.0241198	121.145	0.0437246	121.141	0.103111	121.146	-0.0296924
121.237	-0.0243323	121.243	0.0404432	121.239	0.0993943	121.244	-0.0323974
121.335	-0.0249497	121.341	0.0371933	121.336	0.0957833	121.341	-0.0351539
121.433	-0.0257597	121.438	0.0340253	121.434	0.0922887	121.439	-0.0380065
121.53	-0.0264606	121.536	0.0308646	121.531	0.08889	121.536	-0.0407855
121.628	-0.0272013	121.633	0.0277813	121.629	0.0854507	121.634	-0.0435365
121.726	-0.0278648	121.731	0.024699	121.727	0.0819351	121.732	-0.0462284
121.823	-0.0283969	121.829	0.0214463	121.824	0.078378	121.829	-0.0489457
121.921	-0.0292666	121.926	0.0180104	121.922	0.0749692	121.927	-0.051512
122.018	-0.0299733	122.024	0.0147339	122.019	0.0716446	122.024	-0.0537477
122.116	-0.0307567	122.121	0.0115096	122.117	0.0681445	122.122	-0.0558295
122.214	-0.0310574	122.219	0.00818359	122.215	0.064512	122.22	-0.0577756
122.311	-0.0311263	122.317	0.00478142	122.312	0.0609928	122.317	-0.0597775
122.409	-0.0311408	122.414	0.00129817	122.41	0.0576498	122.415	-0.0617802
122.506	-0.0310506	122.512	-0.00216571	122.508	0.0543352	122.513	-0.0636908
122.604	-0.0306272	122.61	-0.00550798	122.605	0.0510357	122.61	-0.0655908
122.702	-0.0302809	122.707	-0.00850475	122.703	0.0476589	122.708	-0.067405
122.799	-0.0298948	122.805	-0.0110304	122.8	0.0442995	122.805	-0.0692779
122.897	-0.0294534	122.902	-0.0128123	122.898	0.0407999	122.903	-0.0711057
122.995	-0.0291095	123	-0.0140028	122.996	0.0372432	123.001	-0.0729875
123.092	-0.0286564	123.098	-0.0145352	123.093	0.0336747	123.098	-0.0747738
123.19	-0.0281083	123.195	-0.0145195	123.191	0.0300805	123.196	-0.076158
123.287	-0.0273696	123.293	-0.0137762	123.288	0.0266165	123.293	-0.0771858
123.385	-0.0264466	123.39	-0.0123677	123.386	0.0232736	123.391	-0.0779358
123.483	-0.0253232	123.488	-0.010334	123.484	0.0200302	123.489	-0.0786245
123.58	-0.0243395	123.586	-0.00775792	123.581	0.0169549	123.586	-0.0791834
123.678	-0.0231764	123.683	-0.00492601	123.679	0.0141839	123.684	-0.0794722
123.775	-0.0218813	123.781	-0.00183599	123.777	0.0114932	123.782	-0.0796396
123.873	-0.0203161	123.879	0.00124592	123.874	0.00884356	123.879	-0.0799478
123.971	-0.0185602	123.976	0.00385892	123.972	0.00638488	123.977	-0.0802907
124.068	-0.0168941	124.074	0.00608229	124.069	0.00425461	124.074	-0.0806742
124.166	-0.0155505	124.171	0.00788855	124.167	0.00231526	124.172	-0.0812864
124.264	-0.0145315	124.269	0.0094741	124.265	0.00029917	124.27	-0.0818381
124.361	-0.0138058	124.367	0.0107916	124.362	-0.0020033	124.367	-0.0824617
124.459	-0.0132568	124.464	0.0119033	124.46	-0.00435692	124.465	-0.08309
124.556	-0.0127208	124.562	0.0127299	124.557	-0.00671146	124.563	-0.0837555
124.654	-0.0122207	124.66	0.0132227	124.655	-0.00917333	124.66	-0.0844437
124.752	-0.0118196	124.757	0.0131015	124.753	-0.0117841	124.758	-0.085242
124.849	-0.0115445	124.855	0.0121015	124.85	-0.0143958	124.855	-0.0860102
124.947	-0.0111036	124.952	0.0105741	124.948	-0.0169746	124.953	-0.0865416
125.044	-0.0105909	125.05	0.00851962	125.046	-0.0193798	125.051	-0.0870033
125.142	-0.0100496	125.148	0.00609535	125.143	-0.0217033	125.148	-0.0876011
125.24	-0.00935409	125.245	0.00323145	125.241	-0.0238486	125.246	-0.0882831
125.337	-0.00862555	125.343	4.05396e-06	125.338	-0.025904	125.343	-0.089012
125.435	-0.00783493	125.44	-0.00359541	125.436	-0.0277301	125.441	-0.0896795
125.532	-0.00714616	125.538	-0.00751018	125.534	-0.0292396	125.539	-0.0902233
125.63	-0.00654228	125.636	-0.0116623	125.631	-0.0306999	125.636	-0.090838
125.728	-0.00587777	125.733	-0.0158897	125.729	-0.031649	125.734	-0.0911052
125.825	-0.00540194	125.831	-0.0197387	125.826	-0.0323885	125.832	-0.0912134
125.923	-0.00505077	125.929	-0.0232382	125.924	-0.0330809	125.929	-0.0913018
126.021	-0.00446629	126.026	-0.0263814	126.022	-0.0338085	126.027	-0.0911365
126.118	-0.00356896	126.124	-0.029198	126.119	-0.0344173	126.124	-0.0905192
126.216	-0.00252417	126.221	-0.0316533	126.217	-0.0347759	126.222	-0.0898808
126.313	-0.00131932	126.319	-0.0338064	126.315	-0.0348202	126.32	-0.0889308
126.411	0.000138238	126.417	-0.0358113	126.412	-0.0345735	126.417	-0.0877567
126.509	0.00182765	126.514	-0.0375315	126.51	-0.0341876	126.515	-0.0863801
126.606	0.00345885	126.612	-0.0390356	126.607	-0.0334006	126.612	-0.0847249
126.704	0.005319	126.709	-0.0401945	126.705	-0.0326328	126.71	-0.0829623
126.801	0.00718157	126.807	-0.041213	126.803	-0.0316426	126.808	-0.0809092
126.899	0.00898012	126.905	-0.0421026	126.9	-0.0303454	126.905	-0.0787776
126.997	0.0105924	127.002	-0.0427607	126.998	-0.0289053	127.003	-0.076451
127.094	0.0119835	127.1	-0.0434643	127.095	-0.0272236	127.101	-0.0740664
127.192	0.0129269	127.198	-0.044276	127.193	-0.0257674	127.198	-0.0717217
127.29	0.0136414	127.295	-0.0451471	127.291	-0.0242414	127.296	-0.0694166
127.387	0.0140144	127.393	-0.0459759	127.388	-0.0230073	127.393	-0.0672803
127.485	0.0143399	127.49	-0.0467628	127.486	-0.0220125	127.491	-0.065267
127.582	0.0148516	127.588	-0.0474345	127.584	-0.0210986	127.589	-0.0632917
127.68	0.0150902	127.686	-0.048138	127.681	-0.0202394	127.686	-0.0613756
127.778	0.0155801	127.783	-0.0486822	127.779	-0.0193867	127.784	-0.0595094
127.875	0.0158915	127.881	-0.0491299	127.876	-0.0186815	127.881	-0.0577113
127.973	0.0159284	127.978	-0.0496011	127.974	-0.0179584	127.979	-0.0563212
128.07	0.015485	128.076	-0.0497484	128.072	-0.0172998	128.077	-0.0553454
128.168	0.0147851	128.174	-0.049752	128.169	-0.0166453	128.174	-0.0543903
128.266	0.0138466	128.271	-0.0495488	128.267	-0.015888	128.272	-0.0537435
128.363	0.0125913	128.369	-0.0490105	128.364	-0.015185	128.37	-0.0532539
128.461	0.0108325	128.467	-0.0483844	128.462	-0.0145017	128.467	-0.0530666
128.559	0.00880501	128.564	-0.0476561	128.56	-0.0137979	128.565	-0.0533194
128.656	0.0062464	128.662	-0.0467119	128.657	-0.0129739	128.662	-0.0539206
128.754	0.00349281	128.759	-0.045553	128.755	-0.0122852	128.76	-0.0549353
128.851	0.000673242	128.857	-0.0441305	128.853	-0.0118005	128.858	-0.0562485
128.949	-0.00207017	128.955	-0.0425409	128.95	-0.0114461	128.955	-0.0579075
129.047	-0.00453032	129.052	-0.0407815	129.048	-0.01141	129.053	-0.0596828
129.144	-0.00652822	129.15	-0.0388932	129.145	-0.0113068	129.151	-0.061565
129.242	-0.00796055	129.247	-0.0369126	129.243	-0.0112415	129.248	-0.0636249
129.339	-0.00890687	129.345	-0.0349735	129.341	-0.0108925	129.346	-0.0657599
129.437	-0.0094443	129.443	-0.0330222	129.438	-0.0103225	129.443	-0.0678747
129.535	-0.0100477	129.54	-0.0309074	129.536	-0.00983744	129.541	-0.0699037
129.632	-0.0102252	129.638	-0.028652	129.633	-0.00956567	129.639	-0.0721926
129.73	-0.0103125	129.736	-0.026503	129.731	-0.00930213	129.736	-0.074608
129.828	-0.0102359	129.833	-0.0243728	129.829	-0.00882848	129.834	-0.077072
129.925	-0.0101612	129.931	-0.0222517	129.926	-0.00824796	129.931	-0.0794012
130.023	-0.00994099	130.028	-0.0202283	130.024	-0.00758156	130.029	-0.081707
130.12	-0.0100414	130.126	-0.0183374	130.122	-0.00686858	130.127	-0.083977
130.218	-0.0104154	130.224	-0.0164194	130.219	-0.0063963	130.224	-0.0860918
130.316	-0.0108868	130.321	-0.0146055	130.317	-0.00598842	130.322	-0.0881968
130.413	-0.0112395	130.419	-0.0127452	130.414	-0.00585049	130.42	-0.0901425
130.511	-0.0113442	130.517	-0.0110696	130.512	-0.00600898	130.517	-0.0919305
130.608	-0.0115465	130.614	-0.00970382	130.61	-0.00630723	130.615	-0.0933299
130.706	-0.0117652	130.712	-0.00846241	130.707	-0.00672561	130.712	-0.0946135
130.804	-0.0121106	130.809	-0.00745207	130.805	-0.00728467	130.81	-0.0957681
130.901	-0.0125355	130.907	-0.00648768	130.902	-0.00805521	130.908	-0.0966813
130.999	-0.0130535	131.005	-0.00566518	131	-0.00889745	131.005	-0.0973819
131.096	-0.0134343	131.102	-0.00490439	131.098	-0.0098146	131.103	-0.0978753
131.194	-0.0139838	131.2	-0.00437917	131.195	-0.0106632	131.2	-0.0981471
131.292	-0.0148593	131.297	-0.00396522	131.293	-0.0114913	131.298	-0.0981205
131.389	-0.0159036	131.395	-0.00368099	131.391	-0.0121933	131.396	-0.0977117
131.487	-0.0170775	131.493	-0.00354992	131.488	-0.0124729	131.493	-0.0968302
131.585	-0.0183371	131.59	-0.00343325	131.586	-0.0124121	131.591	-0.0955741
131.682	-0.0197719	131.688	-0.00346568	131.683	-0.0121358	131.689	-0.093885
131.78	-0.02108	131.786	-0.00364361	131.781	-0.0118284	131.786	-0.0917241
131.877	-0.0222747	131.883	-0.00413594	131.879	-0.0115562	131.884	-0.0890682
131.975	-0.0234757	131.981	-0.00499628	131.976	-0.0112753	131.981	-0.0858715
132.073	-0.0244938	132.078	-0.00597193	132.074	-0.011178	132.079	-0.0823404
132.17	-0.0251651	132.176	-0.0068674	132.171	-0.0110177	132.177	-0.0784381
132.268	-0.0255041	132.274	-0.00775792	132.269	-0.0112492	132.274	-0.0742279
132.365	-0.0259766	132.371	-0.00857907	132.367	-0.0115356	132.372	-0.0698584
132.463	-0.0265979	132.469	-0.00908852	132.464	-0.0119928	132.469	-0.0655291
132.561	-0.0269636	132.566	-0.00920474	132.562	-0.0126994	132.567	-0.0611249
132.658	-0.0273541	132.664	-0.00893627	132.66	-0.0134636	132.665	-0.0566856
132.756	-0.0276956	132.762	-0.00821287	132.757	-0.0140998	132.762	-0.0522096
132.854	-0.0277683	132.859	-0.00703091	132.855	-0.0145844	132.86	-0.0479238
132.951	-0.0276112	132.957	-0.00516024	132.952	-0.0147927	132.958	-0.043802
133.049	-0.0274657	133.055	-0.00260399	133.05	-0.0147717	133.055	-0.0398414
133.146	-0.0274564	133.152	0.000427918	133.148	-0.0146785	133.153	-0.0359187
133.244	-0.027374	133.25	0.00400081	133.245	-0.014489	133.25	-0.0320913
133.342	-0.0273032	133.347	0.00800341	133.343	-0.014372	133.348	-0.0285973
133.439	-0.0271717	133.445	0.0122407	133.44	-0.0143999	133.446	-0.0255368
133.537	-0.0275079	133.543	0.0166437	133.538	-0.0144648	133.543	-0.0227832
133.634	-0.0275467	133.64	0.0212085	133.636	-0.0147064	133.641	-0.0203352
133.732	-0.0277062	133.738	0.0258377	133.733	-0.0149343	133.739	-0.0180923
133.83	-0.0279555	133.835	0.0305668	133.831	-0.0152115	133.836	-0.0160647
133.927	-0.0282417	133.933	0.0353433	133.929	-0.0156436	133.934	-0.01419
134.025	-0.0283547	134.031	0.0398076	134.026	-0.0161465	134.031	-0.0123995
134.123	-0.0281796	134.128	0.0438782	134.124	-0.017049	134.129	-0.0109434
134.22	-0.0280724	134.226	0.0475808	134.221	-0.0177885	134.227	-0.00961968
134.318	-0.027764	134.324	0.0509546	134.319	-0.0183855	134.324	-0.00831538
134.415	-0.0270572	134.421	0.0539226	134.417	-0.0187769	134.422	-0.00668046
134.513	-0.0261255	134.519	0.0563306	134.514	-0.0189701	134.519	-0.00479483
134.611	-0.0251622	134.616	0.0582036	134.612	-0.0192218	134.617	-0.00250797
134.708	-0.023838	134.714	0.0595297	134.709	-0.0198608	134.715	-3.34002e-05
134.806	-0.0225541	134.812	0.0602585	134.807	-0.0205167	134.812	0.00267836
134.903	-0.0215297	134.909	0.0603166	134.905	-0.0214023	134.91	0.00556177
135.001	-0.0208695	135.007	0.0598769	135.002	-0.0224889	135.008	0.00868194
135.099	-0.0204466	135.104	0.0590517	135.1	-0.0237102	135.105	0.0120921
135.196	-0.0197607	135.202	0.0577	135.198	-0.0251897	135.203	0.0156
135.294	-0.018778	135.3	0.055773	135.295	-0.0267874	135.3	0.0192406
135.391	-0.0178215	135.397	0.0534996	135.393	-0.0284084	135.398	0.0226876
135.489	-0.0164406	135.495	0.0507564	135.49	-0.0299942	135.496	0.0261502
135.587	-0.0155098	135.593	0.0476998	135.588	-0.0314142	135.593	0.0295072
135.684	-0.014545	135.69	0.0445106	135.686	-0.0327867	135.691	0.0324502
135.782	-0.0136836	135.788	0.0414152	135.783	-0.0342127	135.788	0.0349814
135.88	-0.0125142	135.885	0.0384162	135.881	-0.0354482	135.886	0.0369651
135.977	-0.0113297	135.983	0.0357703	135.978	-0.0364613	135.984	0.0385282
136.075	-0.0106312	136.081	0.0333235	136.076	-0.0369431	136.081	0.0401745
136.172	-0.0103096	136.178	0.0312407	136.174	-0.0372396	136.179	0.0417663
136.27	-0.0100889	136.276	0.0293885	136.271	-0.037637	136.277	0.0431932
136.368	-0.0101675	136.374	0.0276079	136.369	-0.0380878	136.374	0.0444891
136.465	-0.0103591	136.471	0.0263714	136.467	-0.038661	136.472	0.0453122
136.563	-0.0105871	136.569	0.0256679	136.564	-0.0391447	136.569	0.045828
136.66	-0.0115421	136.666	0.0252715	136.662	-0.0393571	136.667	0.0463405
136.758	-0.0124569	136.764	0.0249548	136.759	-0.0393899	136.765	0.0467476
136.856	-0.0132141	136.862	0.024617	136.857	-0.0393826	136.862	0.0470182
136.953	-0.0138475	136.959	0.0240526	136.955	-0.0392835	136.96	0.0471108
137.051	-0.0138504	137.057	0.0234783	137.052	-0.0393091	137.057	0.0463937
137.149	-0.0139523	137.154	0.0228963	137.15	-0.0392589	137.155	0.0452133
137.246	-0.0142705	137.252	0.0225296	137.247	-0.0389958	137.253	0.0436232
137.344	-0.0143476	137.35	0.0222229	137.345	-0.0389337	137.35	0.0419756
137.441	-0.014658	137.447	0.0219472	137.443	-0.0391241	137.448	0.0400929
137.539	-0.0144844	137.545	0.0216734	137.54	-0.0395315	137.546	0.0379464
137.637	-0.0141997	137.643	0.0212346	137.638	-0.0400362	137.643	0.0359598
137.734	-0.0136899	137.74	0.0205909	137.736	-0.040461	137.741	0.034086
137.832	-0.0135386	137.838	0.0198977	137.833	-0.0407255	137.838	0.0323306
137.929	-0.0133237	137.935	0.019227	137.931	-0.0410511	137.936	0.030472
138.027	-0.0131864	138.033	0.0184329	138.028	-0.041348	138.034	0.0285449
138.125	-0.012845	138.131	0.0173712	138.126	-0.0415883	138.131	0.0265248
138.222	-0.0125001	138.228	0.0159532	138.224	-0.0417527	138.229	0.024479
138.32	-0.0122401	138.326	0.0145046	138.321	-0.041781	138.327	0.0222268
138.418	-0.0118797	138.423	0.0125303	138.419	-0.0415074	138.424	0.0200131
138.515	-0.0115969	138.521	0.0100326	138.516	-0.0410342	138.522	0.0177292
138.613	-0.0109271	138.619	0.00724217	138.614	-0.0405647	138.619	0.0150893
138.71	-0.0106045	138.716	0.00455755	138.712	-0.0404893	138.717	0.0123454
138.808	-0.0101248	138.814	0.00188284	138.809	-0.0406492	138.815	0.00972284
138.906	-0.00965675	138.912	-0.000811692	138.907	-0.0409854	138.912	0.00711636
139.003	-0.00930316	139.009	-0.00362018	139.005	-0.0412681	139.01	0.00492716
139.101	-0.00896411	139.107	-0.00628183	139.102	-0.0417664	139.107	0.00293288
139.198	-0.00876039	139.204	-0.00895609	139.2	-0.0424132	139.205	0.00129373
139.296	-0.00851302	139.302	-0.0116655	139.297	-0.0429576	139.303	-0.000208434
139.394	-0.00826807	139.4	-0.0140916	139.395	-0.0436592	139.4	-0.00149033
139.491	-0.00826468	139.497	-0.0164451	139.493	-0.044316	139.498	-0.00239129
139.589	-0.00809685	139.595	-0.0183662	139.59	-0.0448024	139.596	-0.00309354
139.686	-0.00791399	139.692	-0.0200207	139.688	-0.0450523	139.693	-0.00355902
139.784	-0.00768844	139.79	-0.0214743	139.785	-0.0452939	139.791	-0.00399576
139.882	-0.00749782	139.888	-0.0230292	139.883	-0.0453281	139.888	-0.00418729
139.979	-0.00715392	139.985	-0.024344	139.981	-0.0454725	139.986	-0.0044993
140.077	-0.00664802	140.083	-0.0255336	140.078	-0.0455254	140.084	-0.00473945
140.175	-0.00594956	140.181	-0.0263539	140.176	-0.0454145	140.181	-0.00504808
140.272	-0.00521277	140.278	-0.026894	140.274	-0.0452628	140.279	-0.00516858
140.37	-0.00452207	140.376	-0.0271376	140.371	-0.0448198	140.376	-0.00509543
140.467	-0.00371108	140.473	-0.0270426	140.469	-0.0443379	140.474	-0.00482654
140.565	-0.00280598	140.571	-0.0268494	140.566	-0.0439218	140.572	-0.0043767
140.663	-0.00169669	140.669	-0.0265755	140.664	-0.0432719	140.669	-0.00397547
140.76	-0.00081633	140.766	-0.0261314	140.762	-0.0424616	140.767	-0.00360257
140.858	0.000117381	140.864	-0.0254251	140.859	-0.0415723	140.865	-0.00320684
140.955	0.000667421	140.961	-0.0245373	140.957	-0.0406931	140.962	-0.0026606
141.053	0.000810995	141.059	-0.0236084	141.054	-0.0397471	141.06	-0.0019778
141.151	0.000713986	141.157	-0.0226116	141.152	-0.0389309	141.157	-0.00126498
141.248	0.000376395	141.254	-0.021504	141.25	-0.0381965	141.255	-0.000484514
141.346	0.00010477	141.352	-0.0204058	141.347	-0.0375561	141.353	0.000220695
141.444	1.45513e-05	141.45	-0.019136	141.445	-0.0370231	141.45	0.000750025
141.541	-0.000680033	141.547	-0.0178266	141.543	-0.0365924	141.548	0.000982135
141.639	-0.00149491	141.645	-0.0167586	141.64	-0.0364348	141.645	0.00105612
141.736	-0.002481	141.742	-0.0158257	141.738	-0.0364658	141.743	0.00109079
141.834	-0.00334875	141.84	-0.0147447	141.835	-0.0366682	141.841	0.00101638
141.932	-0.00414228	141.938	-0.0136713	141.933	-0.0367289	141.938	0.000853608
142.029	-0.00484463	142.035	-0.0124245	142.031	-0.0366262	142.036	0.000432512
142.127	-0.00545869	142.133	-0.0110718	142.128	-0.0364042	142.134	-9.13221e-05
142.224	-0.00597381	142.231	-0.00966013	142.226	-0.0360744	142.231	-0.00091914
142.322	-0.0062076	142.328	-0.00822773	142.323	-0.0358492	142.329	-0.00196173
142.42	-0.00637446	142.426	-0.00686155	142.421	-0.035472	142.426	-0.00315273
142.517	-0.00628133	142.523	-0.00554626	142.519	-0.0348832	142.524	-0.00417629
142.615	-0.00587486	142.621	-0.00425801	142.616	-0.0341935	142.622	-0.00493012
142.713	-0.00512013	142.719	-0.00295894	142.714	-0.0334477	142.719	-0.00553513
142.81	-0.0041612	142.816	-0.00169996	142.812	-0.0326689	142.817	-0.00611308
142.908	-0.00258674	142.914	-0.000499087	142.909	-0.0317307	142.914	-0.00668892
143.005	-0.000253193	143.011	0.00063467	143.007	-0.0307186	143.012	-0.00715272
143.103	0.00259353	143.109	0.00170266	143.104	-0.0296461	143.11	-0.00760468
143.201	0.00564543	143.207	0.00257561	143.202	-0.0284947	143.207	-0.00788456
143.298	0.00871771	143.304	0.00336884	143.3	-0.0270322	143.305	-0.00787399
143.396	0.0118453	143.402	0.00420621	143.397	-0.0255395	143.403	-0.00783806
143.493	0.0152037	143.5	0.00515393	143.495	-0.0239729	143.5	-0.0077053
143.591	0.0183483	143.597	0.00649489	143.592	-0.0223163	143.598	-0.00765034
143.689	0.0216213	143.695	0.00782729	143.69	-0.0206829	143.695	-0.00747488
143.786	0.0244948	143.792	0.00885564	143.788	-0.0190268	143.793	-0.00717386
143.884	0.0272653	143.89	0.00976778	143.885	-0.0177556	143.891	-0.00680941
143.981	0.029644	143.988	0.0105317	143.983	-0.0169778	143.988	-0.00627416
144.079	0.0317534	144.085	0.011116	144.081	-0.0165758	144.086	-0.00574906
144.177	0.033583	144.183	0.0115533	144.178	-0.0165804	144.184	-0.00522438
144.274	0.0350013	144.28	0.0119398	144.276	-0.0170372	144.281	-0.00484979
144.372	0.0365321	144.378	0.0121794	144.373	-0.0179749	144.379	-0.00459063
144.47	0.0379242	144.476	0.0122281	144.471	-0.0193108	144.476	-0.00465362
144.567	0.0390621	144.573	0.0119416	144.569	-0.021094	144.574	-0.00499777
144.665	0.0399497	144.671	0.0116038	144.666	-0.0229703	144.672	-0.00564337
144.762	0.0404149	144.769	0.011434	144.764	-0.025006	144.769	-0.00642172
144.86	0.0403101	144.866	0.0112353	144.861	-0.0269938	144.867	-0.00731211
144.958	0.0400123	144.964	0.0108083	144.959	-0.0287943	144.964	-0.00861302
145.055	0.0395137	145.061	0.0101673	145.057	-0.0307359	145.062	-0.0100425
145.153	0.0388259	145.159	0.00956238	145.154	-0.0325954	145.16	-0.0116296
145.25	0.0381531	145.257	0.00894393	145.252	-0.0344278	145.257	-0.0134666
145.348	0.0369337	145.354	0.00817908	145.349	-0.0362133	145.355	-0.0151958
145.446	0.0359331	145.452	0.00713587	145.447	-0.0379859	145.453	-0.0169364
145.543	0.0353903	145.549	0.00577644	145.545	-0.0394671	145.55	-0.018576
145.641	0.034849	145.647	0.0043008	145.642	-0.0405615	145.648	-0.0202304
145.739	0.0347209	145.745	0.0029157	145.74	-0.0414083	145.745	-0.0218843
145.836	0.0346361	145.842	0.00162338	145.838	-0.041987	145.843	-0.0235459
145.934	0.0347515	145.94	0.000444584	145.935	-0.0422729	145.941	-0.0252188
146.031	0.0349412	146.038	-0.000603589	146.033	-0.0420788	146.038	-0.0265823
146.129	0.0355373	146.135	-0.0016905	146.13	-0.0414216	146.136	-0.0278389
146.227	0.0361319	146.233	-0.00284363	146.228	-0.0404624	146.233	-0.0289381
146.324	0.0364715	146.33	-0.00393955	146.326	-0.0391483	146.331	-0.0299651
146.422	0.0363066	146.428	-0.00478097	146.423	-0.0374611	146.429	-0.0306187
146.519	0.0359927	146.526	-0.00544356	146.521	-0.035403	146.526	-0.03111
146.617	0.0354902	146.623	-0.00606337	146.619	-0.0333759	146.624	-0.0315429
146.715	0.0351274	146.721	-0.00686425	146.716	-0.0311863	146.722	-0.0318498
146.812	0.0347593	146.818	-0.0075764	146.814	-0.0291666	146.819	-0.0321069
146.91	0.0336558	146.916	-0.00807593	146.911	-0.0272162	146.917	-0.0319424
147.008	0.0323651	147.014	-0.00846016	147.009	-0.0251732	147.014	-0.0317378
147.105	0.0310715	147.111	-0.00872772	147.107	-0.0231197	147.112	-0.0315585
147.203	0.0297294	147.209	-0.00878763	147.204	-0.0208533	147.21	-0.0311692
147.3	0.02888	147.307	-0.00875339	147.302	-0.0182393	147.307	-0.0307874
147.398	0.0281263	147.404	-0.00869304	147.399	-0.0154372	147.405	-0.0303219
147.496	0.0271193	147.502	-0.0082962	147.497	-0.0127181	147.502	-0.0297482
147.593	0.0263772	147.599	-0.00767504	147.595	-0.0101138	147.6	-0.0289089
147.691	0.025185	147.697	-0.00694037	147.692	-0.00754456	147.698	-0.0278837
147.788	0.0242808	147.795	-0.00636246	147.79	-0.00478261	147.795	-0.0264377
147.886	0.0236765	147.892	-0.00586923	147.888	-0.00203116	147.893	-0.024777
147.984	0.0232433	147.99	-0.00548726	147.985	0.000706589	147.991	-0.0230808
148.081	0.0226623	148.087	-0.00516519	148.083	0.0032251	148.088	-0.021043
148.179	0.0220972	148.185	-0.00486925	148.18	0.00545037	148.186	-0.0188986
148.276	0.0215932	148.283	-0.00447692	148.278	0.00739795	148.283	-0.0163669
148.374	0.0213119	148.38	-0.00400081	148.376	0.00903082	148.381	-0.014023
148.472	0.0210218	148.478	-0.00350172	148.473	0.0104303	148.479	-0.011693
148.569	0.0208981	148.576	-0.00311029	148.571	0.0117489	148.576	-0.00944338
148.667	0.0209486	148.673	-0.00271525	148.668	0.0127903	148.674	-0.00742795
148.765	0.0208458	148.771	-0.00222382	148.766	0.013617	148.772	-0.00566366
148.862	0.0212134	148.868	-0.00166888	148.864	0.0142875	148.869	-0.0041708
148.96	0.02173	148.966	-0.000913492	148.961	0.0148142	148.967	-0.00287495
149.057	0.0221103	149.064	0	149.059	0.0151097	149.064	-0.00168396
149.155	0.0226526	149.161	0.000709443	149.156	0.0150476	149.162	-0.000585983
149.253	0.023011	149.259	0.0012297	149.254	0.0145648	149.26	0.000218581
149.35	0.0230862	149.356	0.00162113	149.352	0.013744	149.357	0.000862063
149.448	0.0231958	149.454	0.00152294	149.449	0.012704	149.455	0.00124004
149.545	0.0230023	149.552	0.00124096	149.547	0.0116083	149.552	0.00131614
149.643	0.0232807	149.649	0.00100989	149.645	0.0102755	149.65	0.00114153
149.741	0.023626	149.747	0.000747279	149.742	0.00863756	149.748	0.000578373
149.838	0.0236896	149.845	0.000513501	149.84	0.00672196	149.845	-0.000387273
149.936	0.0234403	149.942	0.000467106	149.937	0.00438935	149.943	-0.00162266
150.034	0.0230018	150.04	0.000470709	150.035	0.0019864	150.041	-0.00338314
150.131	0.0225924	150.137	0.000518456	150.133	-0.000149813	150.138	-0.00544296
150.229	0.0222019	150.235	0.000504943	150.23	-0.00228831	150.236	-0.00802789
150.326	0.0217547	150.333	0.000408549	150.328	-0.00438981	150.333	-0.0107354
150.424	0.0210354	150.43	0.000630616	150.425	-0.00635428	150.431	-0.0135237
150.522	0.0201774	150.528	0.00100763	150.523	-0.0080785	150.529	-0.0161568
150.619	0.0190031	150.626	0.00114412	150.621	-0.00950173	150.626	-0.0187464
150.717	0.0182789	150.723	0.00115087	150.718	-0.0104938	150.724	-0.0210535
150.814	0.0175669	150.821	0.00103556	150.816	-0.0110834	150.821	-0.023099
150.912	0.0170513	150.918	0.000460349	150.914	-0.0109487	150.919	-0.0247512
151.01	0.0169305	151.016	-0.000369811	151.011	-0.0103289	151.017	-0.0257494
151.107	0.0164886	151.114	-0.00123195	151.109	-0.00943276	151.114	-0.0263206
151.205	0.0160341	151.211	-0.00207653	151.206	-0.00817031	151.212	-0.0260805
151.303	0.0157911	151.309	-0.00273732	151.304	-0.00651414	151.31	-0.02524
151.4	0.015942	151.406	-0.00315758	151.402	-0.00477621	151.407	-0.0239441
151.498	0.0162611	151.504	-0.00356028	151.499	-0.00311639	151.505	-0.0223773
151.595	0.0162829	151.602	-0.00392919	151.597	-0.00116242	151.602	-0.0204811
151.693	0.0156834	151.699	-0.00418909	151.694	0.00107838	151.7	-0.018401
151.791	0.0151009	151.797	-0.00456295	151.792	0.00346352	151.798	-0.0159826
151.888	0.0146236	151.895	-0.00515348	151.89	0.00585825	151.895	-0.0133964
151.986	0.0143219	151.992	-0.00575617	151.987	0.00829728	151.993	-0.0109244
152.083	0.0141371	152.09	-0.00628994	152.085	0.0107254	152.09	-0.00861641
152.181	0.014075	152.187	-0.00664173	152.183	0.0133425	152.188	-0.00662212
152.279	0.0144461	152.285	-0.00699803	152.28	0.0162292	152.286	-0.00507345
152.376	0.0152251	152.383	-0.00776333	152.378	0.0193478	152.383	-0.00376915
152.474	0.0160477	152.48	-0.00857637	152.475	0.0225177	152.481	-0.00280942
152.571	0.017093	152.578	-0.00934933	152.573	0.0257387	152.579	-0.001911
152.669	0.0179767	152.675	-0.0101574	152.671	0.0286673	152.676	-0.00121932
152.767	0.0188202	152.773	-0.0108002	152.768	0.0312416	152.774	-0.000870519
152.864	0.0195439	152.871	-0.0108849	152.866	0.0331919	152.871	-0.000916603
152.962	0.0200692	152.968	-0.0107795	152.963	0.0347375	152.969	-0.00160575
153.06	0.0208603	153.066	-0.0105835	153.061	0.0358511	153.067	-0.00290962
153.157	0.0217028	153.164	-0.0103106	153.159	0.0364759	153.164	-0.00479103
153.255	0.022103	153.261	-0.0100682	153.256	0.0363804	153.262	-0.00715441
153.352	0.022234	153.359	-0.009884	153.354	0.0359557	153.359	-0.00989492
153.45	0.0223824	153.456	-0.00956013	153.452	0.035281	153.457	-0.0128274
153.548	0.0228136	153.554	-0.0091151	153.549	0.0340615	153.555	-0.015896
153.645	0.0235557	153.652	-0.00853808	153.647	0.0323163	153.652	-0.0190614
153.743	0.0242454	153.749	-0.00800161	153.744	0.0303769	153.75	-0.0224999
153.84	0.0249148	153.847	-0.00761603	153.842	0.0284234	153.848	-0.0262221
153.938	0.0254833	153.944	-0.00736379	153.94	0.0262685	153.945	-0.0296319
154.036	0.02585	154.042	-0.00734307	154.037	0.0239848	154.043	-0.0325715
154.133	0.0258015	154.14	-0.00754036	154.135	0.0217197	154.14	-0.0350749
154.231	0.0254658	154.237	-0.00775342	154.232	0.0193177	154.238	-0.036974
154.329	0.0247843	154.335	-0.00777774	154.33	0.0166827	154.336	-0.0385506
154.426	0.0240223	154.433	-0.00785792	154.428	0.0137979	154.433	-0.039805
154.524	0.0229887	154.53	-0.00767099	154.525	0.0109816	154.531	-0.0409076
154.621	0.0219934	154.628	-0.00746694	154.623	0.00849369	154.628	-0.0418817
154.719	0.0209418	154.725	-0.00730838	154.721	0.00626841	154.726	-0.0425519
154.817	0.0195793	154.823	-0.0072701	154.818	0.00420025	154.824	-0.0427239
154.914	0.0182964	154.921	-0.00732685	154.916	0.00224674	154.921	-0.0426288
155.012	0.01685	155.018	-0.00729757	155.013	0.000453551	155.019	-0.0423071
155.109	0.0156451	155.116	-0.0071692	155.111	-0.00123185	155.117	-0.0418378
155.207	0.014903	155.213	-0.00703452	155.209	-0.00250298	155.214	-0.0413169
155.305	0.0139931	155.311	-0.00681876	155.306	-0.00360329	155.312	-0.0407977
155.402	0.0132466	155.409	-0.00670254	155.404	-0.00447111	155.409	-0.0404705
155.5	0.0125093	155.506	-0.00692551	155.501	-0.00525534	155.507	-0.0401635
155.598	0.0117822	155.604	-0.00740253	155.599	-0.0058313	155.605	-0.039767
155.695	0.0111895	155.702	-0.00773855	155.697	-0.00629079	155.702	-0.0391903
155.793	0.0107049	155.799	-0.00794801	155.794	-0.00651916	155.8	-0.0385113
155.89	0.0102606	155.897	-0.00805206	155.892	-0.00661737	155.898	-0.0379113
155.988	0.0104008	155.994	-0.00808269	155.99	-0.0066096	155.995	-0.0374704
156.086	0.0109513	156.092	-0.00815206	156.087	-0.00675896	156.093	-0.0370763
156.183	0.0115513	156.19	-0.00822323	156.185	-0.00677814	156.19	-0.036785
156.281	0.012569	156.287	-0.00847322	156.282	-0.00647988	156.288	-0.0364075
156.378	0.0139368	156.385	-0.00880069	156.38	-0.00614143	156.386	-0.0358676
156.476	0.0157683	156.482	-0.00919843	156.478	-0.00593133	156.483	-0.0355243
156.574	0.0176265	156.58	-0.00945022	156.575	-0.00600943	156.581	-0.0354829
156.671	0.0198985	156.678	-0.0097795	156.673	-0.00644152	156.678	-0.0357306
156.769	0.022508	156.775	-0.0101804	156.77	-0.0072527	156.776	-0.0364033
156.866	0.0252437	156.873	-0.0105912	156.868	-0.00831053	156.874	-0.0374061
156.964	0.0277285	156.971	-0.0110948	156.966	-0.00944464	156.971	-0.0387256
157.062	0.029788	157.068	-0.0117641	157.063	-0.010338	157.069	-0.0403428
157.159	0.0311889	157.166	-0.0127524	157.161	-0.0113159	157.167	-0.0422648
157.257	0.0327924	157.263	-0.0138091	157.259	-0.0124519	157.264	-0.0444498
157.355	0.0338648	157.361	-0.0149258	157.356	-0.0136773	157.362	-0.0468486
157.452	0.0344949	157.459	-0.0158888	157.454	-0.0145963	157.459	-0.0497266
157.55	0.0347132	157.556	-0.0165149	157.551	-0.0152737	157.557	-0.0527774
157.647	0.0347205	157.654	-0.0169536	157.649	-0.0156573	157.655	-0.0560747
157.745	0.0343363	157.751	-0.0172568	157.747	-0.0160076	157.752	-0.0593687
157.843	0.033569	157.849	-0.0172672	157.844	-0.0161255	157.85	-0.0626512
157.94	0.0322526	157.947	-0.0166681	157.942	-0.0159414	157.947	-0.0660288
158.038	0.0307261	158.044	-0.0153532	158.039	-0.0154888	158.045	-0.0693946
158.135	0.0293893	158.142	-0.0131488	158.137	-0.0147425	158.143	-0.0727659
158.233	0.0278338	158.24	-0.0101344	158.235	-0.01385	158.24	-0.0763085
158.331	0.0260561	158.337	-0.00608994	158.332	-0.0122797	158.338	-0.07998
158.428	0.0239733	158.435	-0.00120357	158.43	-0.0104572	158.436	-0.0833906
158.526	0.0220967	158.532	0.00436161	158.528	-0.00819726	158.533	-0.0866203
158.624	0.0198432	158.63	0.0106871	158.625	-0.00523844	158.631	-0.0897544
158.721	0.0178171	158.728	0.0178216	158.723	-0.00139902	158.728	-0.0930606
158.819	0.0156679	158.825	0.0257751	158.82	0.00328356	158.826	-0.0964107
158.916	0.014092	158.923	0.0342433	158.918	0.00858504	158.924	-0.0996493
159.014	0.0126291	159.021	0.0432634	159.016	0.0142218	159.021	-0.10294
159.112	0.0119922	159.118	0.0527384	159.113	0.0202545	159.119	-0.106153
159.209	0.0111546	159.216	0.062599	159.211	0.0268513	159.216	-0.109241
159.307	0.0106933	159.313	0.0724131	159.308	0.0338003	159.314	-0.112105
159.404	0.0107146	159.411	0.0819854	159.406	0.0409794	159.412	-0.114663
159.502	0.0111895	159.509	0.0909532	159.504	0.0483267	159.509	-0.11723
159.6	0.0118613	159.606	0.0993017	159.601	0.055684	159.607	-0.119565
159.697	0.0127567	159.704	0.107215	159.699	0.0633034	159.705	-0.121729
159.795	0.0142763	159.801	0.114527	159.797	0.0711348	159.802	-0.123787
159.892	0.015553	159.899	0.121025	159.894	0.0789599	159.9	-0.125786
159.99	0.0171667	159.997	0.126428	159.992	0.0869831	159.997	-0.127671
160.088	0.0183424	160.094	0.13077	160.089	0.0949547	160.095	-0.129453
160.185	0.0197049	160.192	0.134012	160.187	0.102993	160.193	-0.131084
160.283	0.0207386	160.29	0.136213	160.285	0.110766	160.29	-0.132819
160.381	0.0217819	160.387	0.137379	160.382	0.118513	160.388	-0.134643
160.478	0.0225512	160.485	0.137561	160.48	0.126125	160.485	-0.136323
160.576	0.0234631	160.582	0.13692	160.577	0.133283	160.583	-0.137877
160.673	0.0241572	160.68	0.135262	160.675	0.140001	160.681	-0.138929
160.771	0.0246888	160.778	0.132659	160.773	0.145872	160.778	-0.139552
160.869	0.0252626	160.875	0.129203	160.87	0.151094	160.876	-0.139536
160.966	0.0260032	160.973	0.125215	160.968	0.155549	160.974	-0.138991
161.064	0.0265218	161.07	0.120658	161.066	0.159257	161.071	-0.137985
161.161	0.0269326	161.168	0.115553	161.163	0.16213	161.169	-0.136546
161.259	0.0274191	161.266	0.11032	161.261	0.16439	161.266	-0.13452
161.357	0.0275088	161.363	0.105099	161.358	0.166081	161.364	-0.132162
161.454	0.0275927	161.461	0.100051	161.456	0.167062	161.462	-0.129445
161.552	0.0273138	161.559	0.095177	161.554	0.167522	161.559	-0.126575
161.65	0.0270708	161.656	0.0904699	161.651	0.16732	161.657	-0.123601
161.747	0.0261934	161.754	0.0860187	161.749	0.166672	161.755	-0.120431
161.845	0.0253062	161.851	0.0818251	161.846	0.16561	161.852	-0.117104
161.942	0.0236537	161.949	0.0777499	161.944	0.164123	161.95	-0.113579
162.04	0.0219298	162.047	0.0738473	162.042	0.162273	162.047	-0.110018
162.138	0.020091	162.144	0.0701645	162.139	0.16007	162.145	-0.106383
162.235	0.0183808	162.242	0.0664299	162.237	0.15757	162.243	-0.102731
162.333	0.0165798	162.339	0.0626562	162.335	0.154812	162.34	-0.0990202
162.43	0.0144941	162.437	0.0591148	162.432	0.152117	162.438	-0.095424
162.528	0.0120839	162.535	0.0557266	162.53	0.14947	162.535	-0.0919846
162.626	0.00942587	162.632	0.0526632	162.627	0.146915	162.633	-0.0887955
162.723	0.00688569	162.73	0.0495858	162.725	0.144769	162.731	-0.0856774
162.821	0.00394681	162.828	0.046734	162.823	0.142949	162.828	-0.0829818
162.919	0.000847373	162.925	0.0441503	162.92	0.141583	162.926	-0.0805431
163.016	-0.00249798	163.023	0.0420368	163.018	0.140709	163.024	-0.0780343
163.114	-0.00596459	163.12	0.0402828	163.115	0.140337	163.121	-0.075602
163.211	-0.00946759	163.218	0.0388135	163.213	0.140297	163.219	-0.0733299
163.309	-0.0128454	163.316	0.037595	163.311	0.140423	163.316	-0.071079
163.407	-0.0163761	163.413	0.0365207	163.408	0.140973	163.414	-0.0689845
163.504	-0.0196792	163.511	0.0356113	163.506	0.142058	163.512	-0.0667742
163.602	-0.0229838	163.608	0.0347325	163.604	0.14359	163.609	-0.0645994
163.699	-0.0256385	163.706	0.0339289	163.701	0.145224	163.707	-0.0626321
163.797	-0.0274467	163.804	0.0331114	163.799	0.146987	163.804	-0.0607211
163.895	-0.0283179	163.901	0.03256	163.896	0.148948	163.902	-0.0590926
163.992	-0.0284246	163.999	0.0319236	163.994	0.151211	164	-0.0579477
164.09	-0.0281675	164.097	0.0313425	164.092	0.15345	164.097	-0.0569896
164.188	-0.0273095	164.194	0.0310299	164.189	0.155696	164.195	-0.0561254
164.285	-0.0259848	164.292	0.0309921	164.287	0.158166	164.293	-0.0552795
164.383	-0.0241402	164.389	0.0309191	164.384	0.160323	164.39	-0.0542639
164.48	-0.0216403	164.487	0.030743	164.482	0.162285	164.488	-0.0531423
164.578	-0.0187678	164.585	0.0305817	164.58	0.16397	164.585	-0.0519428
164.676	-0.0159604	164.682	0.0306745	164.677	0.165681	164.683	-0.0507628
164.773	-0.0132796	164.78	0.0309966	164.775	0.167422	164.781	-0.049576
164.871	-0.0105366	164.877	0.0311038	164.873	0.169187	164.878	-0.0482819
164.968	-0.00762878	164.975	0.0310749	164.97	0.17109	164.976	-0.0470135
165.066	-0.00435619	165.073	0.030938	165.068	0.173441	165.073	-0.0457139
165.164	-0.00131496	165.17	0.0305912	165.165	0.176268	165.171	-0.0444552
165.261	0.00188779	165.268	0.0301714	165.263	0.179507	165.269	-0.043203
165.359	0.00530833	165.366	0.0297696	165.361	0.183291	165.366	-0.0418001
165.456	0.00891658	165.463	0.0293619	165.458	0.187361	165.464	-0.0404777
165.554	0.0126538	165.561	0.0288326	165.556	0.191947	165.562	-0.0392364
165.652	0.0162829	165.658	0.0279683	165.653	0.196878	165.659	-0.0379456
165.749	0.0195817	165.756	0.0269399	165.751	0.202493	165.757	-0.0366654
165.847	0.0224207	165.854	0.0257764	165.849	0.208311	165.854	-0.0352169
165.945	0.0245394	165.951	0.0245021	165.946	0.214056	165.952	-0.0332302
166.042	0.0262181	166.049	0.0231116	166.044	0.219731	166.05	-0.0311679
166.14	0.0273449	166.146	0.0215044	166.142	0.225708	166.147	-0.0289529
166.237	0.0280458	166.244	0.0194612	166.239	0.231799	166.245	-0.0266749
166.335	0.0284197	166.342	0.0172762	166.337	0.238163	166.342	-0.0244743
166.433	0.0281054	166.439	0.0150442	166.434	0.245023	166.44	-0.0221566
166.53	0.027762	166.537	0.0125659	166.532	0.252055	166.538	-0.0197015
166.628	0.0272692	166.635	0.00988039	166.63	0.259057	166.635	-0.0172658
166.725	0.0267565	166.732	0.00712731	166.727	0.265803	166.733	-0.0147701
166.823	0.0261279	166.83	0.00449178	166.825	0.272457	166.831	-0.0123095
166.921	0.0255429	166.927	0.00192878	166.922	0.279038	166.928	-0.0101165
167.018	0.0251302	167.025	-0.000656741	167.02	0.285562	167.026	-0.00809257
167.116	0.0248969	167.123	-0.0030175	167.118	0.29165	167.123	-0.00609237
167.214	0.0247033	167.22	-0.00519852	167.215	0.297499	167.221	-0.00435471
167.311	0.0245132	167.318	-0.00724803	167.313	0.302865	167.319	-0.00294641
167.409	0.0242581	167.416	-0.00914528	167.411	0.307596	167.416	-0.00187379
167.506	0.0238239	167.513	-0.0107488	167.508	0.311696	167.514	-0.000991014
167.604	0.0234577	167.611	-0.0117966	167.606	0.3155	167.611	-0.000147976
167.702	0.0232559	167.708	-0.0126614	167.703	0.318675	167.709	0.000605432
167.799	0.0232933	167.806	-0.0134947	167.801	0.321915	167.807	0.0010853
167.897	0.023742	167.904	-0.0141943	167.899	0.325278	167.904	0.00127935
167.994	0.0242551	168.001	-0.0146546	167.996	0.328632	168.002	0.00129669
168.092	0.0250462	168.099	-0.0151686	168.094	0.331805	168.1	0.00106458
168.19	0.0259465	168.196	-0.0153199	168.191	0.334661	168.197	0.000687452
168.287	0.0271096	168.294	-0.0156145	168.289	0.33708	168.295	0.000494661
168.385	0.0285808	168.392	-0.0161289	168.387	0.338945	168.392	0.000231265
168.482	0.0300907	168.489	-0.0167577	168.484	0.340493	168.49	-0.000248599
168.58	0.0317248	168.587	-0.0175798	168.582	0.341679	168.588	-0.00091618
168.678	0.0336742	168.685	-0.0187234	168.68	0.342735	168.685	-0.00177571
168.775	0.0357633	168.782	-0.0201302	168.777	0.343264	168.783	-0.00276038
168.873	0.0375977	168.88	-0.0216094	168.875	0.343381	168.881	-0.00382538
168.971	0.0391606	168.977	-0.0231445	168.972	0.342878	168.978	-0.0048481
169.068	0.0405662	169.075	-0.0248408	169.07	0.342089	169.076	-0.00596426
169.166	0.0418802	169.173	-0.0269512	169.168	0.341055	169.173	-0.00681491
169.263	0.042991	169.27	-0.0292236	169.265	0.339885	169.271	-0.00760552
169.361	0.0440062	169.368	-0.031611	169.363	0.338867	169.369	-0.0080727
169.459	0.044822	169.465	-0.0339933	169.46	0.337725	169.466	-0.00811667
169.556	0.045407	169.563	-0.0365361	169.558	0.336414	169.564	-0.00777802
169.654	0.0455166	169.661	-0.0388883	169.656	0.334857	169.661	-0.00688974
169.751	0.04539	169.758	-0.0409242	169.753	0.332662	169.759	-0.00540956
169.849	0.0451838	169.856	-0.0429742	169.851	0.329757	169.857	-0.00333326
169.947	0.0449811	169.954	-0.045016	169.949	0.326643	169.954	-0.000613887
170.044	0.0444849	170.051	-0.0468282	170.046	0.323482	170.052	0.0028369
170.142	0.0439586	170.149	-0.0485853	170.144	0.320212	170.15	0.00663818
170.24	0.0430458	170.246	-0.0499902	170.241	0.31714	170.247	0.0105473
170.337	0.0422615	170.344	-0.0510731	170.339	0.314088	170.345	0.0146982
170.435	0.0411779	170.442	-0.0519907	170.437	0.311166	170.442	0.0191886
170.532	0.0402931	170.539	-0.0525924	170.534	0.308297	170.54	0.023715
170.63	0.0394293	170.637	-0.0530573	170.632	0.305725	170.638	0.028076
170.728	0.0387672	170.734	-0.0535028	170.729	0.303568	170.735	0.0320896
170.825	0.0383559	170.832	-0.0537573	170.827	0.301636	170.833	0.0359052
170.923	0.0380595	170.93	-0.0539492	170.925	0.299857	170.93	0.0392947
171.02	0.0380779	171.027	-0.0540226	171.022	0.29784	171.028	0.0422576
171.118	0.0380207	171.125	-0.0534294	171.12	0.295702	171.126	0.0446891
171.216	0.0384354	171.223	-0.0524303	171.218	0.293393	171.223	0.0468715
171.313	0.0388555	171.32	-0.0509713	171.315	0.291096	171.321	0.048558
171.411	0.039877	171.418	-0.0492141	171.413	0.288976	171.419	0.0497075
171.509	0.0408199	171.515	-0.0471813	171.51	0.28693	171.516	0.0505015
171.606	0.0420209	171.613	-0.0449512	171.608	0.284978	171.614	0.0508951
171.704	0.0430734	171.711	-0.042458	171.706	0.283278	171.711	0.0510389
171.801	0.04411	171.808	-0.0392819	171.803	0.281915	171.809	0.0510025
171.899	0.045018	171.906	-0.0354613	171.901	0.280586	171.907	0.0506
171.997	0.0460749	172.003	-0.0313839	171.998	0.279124	172.004	0.0497942
172.094	0.0469746	172.101	-0.0272196	172.096	0.27766	172.102	0.0488751
172.192	0.0479214	172.199	-0.0231409	172.194	0.275949	172.199	0.0477251
172.289	0.0484254	172.296	-0.019005	172.291	0.274108	172.297	0.0462272
172.387	0.0488435	172.394	-0.0146902	172.389	0.272141	172.395	0.0443631
172.485	0.0492582	172.492	-0.0103088	172.487	0.270129	172.492	0.0423772
172.582	0.0493121	172.589	-0.00567914	172.584	0.267813	172.59	0.0406049
172.68	0.0491113	172.687	-0.000755387	172.682	0.265299	172.688	0.0392004
172.777	0.0485753	172.784	0.00376973	172.779	0.262663	172.785	0.0377845
172.875	0.0480034	172.882	0.00773225	172.877	0.260074	172.883	0.0366409
172.973	0.0470615	172.98	0.0114862	172.975	0.2577	172.98	0.0357966
173.07	0.0460535	173.077	0.014483	173.072	0.255388	173.078	0.0351848
173.168	0.0444912	173.175	0.0170338	173.17	0.253179	173.176	0.0346128
173.266	0.0428372	173.272	0.0190031	173.267	0.250715	173.273	0.0343515
173.363	0.0407568	173.37	0.0205675	173.365	0.248017	173.371	0.0343405
173.461	0.0383908	173.468	0.021704	173.463	0.245317	173.468	0.0343045
173.558	0.0360752	173.565	0.0222414	173.56	0.242533	173.566	0.034116
173.656	0.033762	173.663	0.0218986	173.658	0.23962	173.664	0.0335486
173.754	0.0315328	173.761	0.0206346	173.756	0.236527	173.761	0.0324654
173.851	0.0291798	173.858	0.0185419	173.853	0.233384	173.859	0.0309447
173.949	0.0269855	173.956	0.0158929	173.951	0.230293	173.957	0.0290058
174.046	0.0251816	174.053	0.0128555	174.048	0.227123	174.054	0.0267379
174.144	0.0237541	174.151	0.00980382	174.146	0.224111	174.152	0.024331
174.242	0.0227544	174.249	0.00649444	174.244	0.221187	174.249	0.0216949
174.339	0.0221564	174.346	0.00277741	174.341	0.218102	174.347	0.0188791
174.437	0.0214142	174.444	-0.00109997	174.439	0.214737	174.445	0.0160274
174.535	0.0209156	174.541	-0.00524627	174.536	0.211321	174.542	0.0130087
174.632	0.0205814	174.639	-0.0096322	174.634	0.207809	174.64	0.010105
174.73	0.0206081	174.737	-0.0139199	174.732	0.204347	174.737	0.00756874
174.827	0.0210058	174.834	-0.0175735	174.829	0.200812	174.835	0.00524256
174.925	0.0215074	174.932	-0.0209355	174.927	0.197283	174.933	0.00315188
175.023	0.022281	175.03	-0.0239161	175.025	0.193881	175.03	0.00133305
175.12	0.0231017	175.127	-0.0270674	175.122	0.190209	175.128	-0.000164464
175.218	0.0243066	175.225	-0.0302903	175.22	0.18657	175.226	-0.00130176
175.315	0.0257282	175.322	-0.0335258	175.317	0.182977	175.323	-0.00215495
175.413	0.0278881	175.42	-0.0368595	175.415	0.179309	175.421	-0.00270542
175.511	0.029953	175.518	-0.0400292	175.513	0.175668	175.518	-0.00287622
175.608	0.0323733	175.615	-0.0426503	175.61	0.172078	175.616	-0.00281957
175.706	0.0347413	175.713	-0.0448525	175.708	0.168641	175.714	-0.00248007
175.804	0.0372621	175.81	-0.0469746	175.805	0.165212	175.811	-0.00156093
175.901	0.0397455	175.908	-0.0490033	175.903	0.161654	175.909	-0.000150935
175.999	0.0418569	176.006	-0.0508263	176.001	0.158263	176.007	0.00163069
176.096	0.0439906	176.103	-0.0526866	176.098	0.155047	176.104	0.00391882
176.194	0.045925	176.201	-0.0542537	176.196	0.151834	176.202	0.00667624
176.292	0.0477187	176.299	-0.0556041	176.294	0.148785	176.299	0.00989576
176.389	0.0493383	176.396	-0.0569297	176.391	0.146046	176.397	0.0135207
176.487	0.0511761	176.494	-0.0580675	176.489	0.143422	176.495	0.0175727
176.584	0.0527491	176.591	-0.059081	176.586	0.141007	176.592	0.0218387
176.682	0.0540548	176.689	-0.059827	176.684	0.138534	176.69	0.0264327
176.78	0.0548755	176.787	-0.0604904	176.782	0.136097	176.787	0.0311095
176.877	0.0557113	176.884	-0.0609094	176.879	0.133914	176.885	0.0356148
176.975	0.0565155	176.982	-0.0608206	176.977	0.131642	176.983	0.0397522
177.072	0.0572872	177.079	-0.0598688	177.074	0.129607	177.08	0.0435023
177.17	0.0578687	177.177	-0.0582009	177.172	0.127626	177.178	0.0467599
177.268	0.0581452	177.275	-0.0559374	177.27	0.12573	177.276	0.0492497
177.365	0.0583252	177.372	-0.0528591	177.367	0.123967	177.373	0.0511611
177.463	0.0582354	177.47	-0.049175	177.465	0.122259	177.471	0.0524946
177.561	0.0581229	177.568	-0.04498	177.563	0.120466	177.568	0.0534758
177.658	0.0582961	177.665	-0.0403098	177.66	0.118883	177.666	0.0539625
177.756	0.0586812	177.763	-0.0351118	177.758	0.117555	177.764	0.0538864
177.853	0.0592831	177.86	-0.0293218	177.855	0.116208	177.861	0.0534112
177.951	0.0599966	177.958	-0.0233589	177.953	0.114667	177.959	0.0525804
178.049	0.0607868	178.056	-0.0171307	178.051	0.112719	178.056	0.051274
178.146	0.0616404	178.153	-0.0109578	178.148	0.110893	178.154	0.0497084
178.244	0.0624733	178.251	-0.00456205	178.246	0.109241	178.252	0.0484485
178.341	0.063454	178.348	0.00191347	178.343	0.107626	178.349	0.0473471
178.439	0.064362	178.446	0.00839845	178.441	0.106025	178.447	0.0461959
178.537	0.065467	178.544	0.0149055	178.539	0.104544	178.545	0.0449182
178.634	0.066424	178.641	0.0214044	178.636	0.102898	178.642	0.0436583
178.732	0.0676356	178.739	0.0278764	178.734	0.101111	178.74	0.0424724
178.83	0.0686251	178.837	0.03426	178.832	0.0991819	178.837	0.0416133
178.927	0.0697295	178.934	0.0404981	178.929	0.0973385	178.935	0.0413254
179.025	0.0709979	179.032	0.0464854	179.027	0.0958266	179.033	0.0416361
179.122	0.0724317	179.129	0.0526222	179.124	0.0943016	179.13	0.042524
179.22	0.0743462	179.227	0.0590171	179.222	0.0929135	179.228	0.0439779
179.318	0.0761913	179.325	0.0656056	179.32	0.0914839	179.325	0.0456911
179.415	0.078359	179.422	0.0726028	179.417	0.0903484	179.423	0.0477682
179.513	0.0804189	179.52	0.0799296	179.515	0.0893207	179.521	0.0502961
179.61	0.082314	179.618	0.0876583	179.612	0.0880409	179.618	0.0530958
179.708	0.0841121	179.715	0.0957401	179.71	0.0867511	179.716	0.0561373
179.806	0.0858631	179.813	0.104031	179.808	0.0856654	179.814	0.0595039
179.903	0.087505	179.91	0.112806	179.905	0.0847048	179.911	0.0630448
180.001	0.0889116	180.008	0.12205	180.003	0.0840453	180.009	0.0666782
180.098	0.0901902	180.106	0.131644	180.101	0.0834757	180.106	0.0702411
180.196	0.0914988	180.203	0.141271	180.198	0.082718	180.204	0.0732378
180.294	0.0926513	180.301	0.151	180.296	0.0820045	180.302	0.0760455
180.391	0.0937004	180.398	0.160574	180.393	0.0812386	180.399	0.0786909
180.489	0.0944809	180.496	0.169946	180.491	0.0805279	180.497	0.0811392
180.587	0.0956309	180.594	0.178996	180.589	0.080405	180.594	0.0832912
180.684	0.0965612	180.691	0.187732	180.686	0.0806937	180.692	0.0853494
180.782	0.0976492	180.789	0.195977	180.784	0.0814569	180.79	0.0869331
180.879	0.0983069	180.887	0.20371	180.881	0.0826851	180.887	0.0880535
180.977	0.0988797	180.984	0.21088	180.979	0.0839969	180.985	0.0888111
181.075	0.0992459	181.082	0.217124	181.077	0.0858202	181.083	0.0892411
181.172	0.0991848	181.179	0.222576	181.174	0.0880181	181.18	0.0895345
181.27	0.0990805	181.277	0.227132	181.272	0.0905485	181.278	0.0897324
181.367	0.0988521	181.375	0.230903	181.37	0.0934461	181.375	0.0899599
181.465	0.0988754	181.472	0.233888	181.467	0.0970096	181.473	0.0899793
181.563	0.098547	181.57	0.236029	181.565	0.101474	181.571	0.0898901
181.66	0.0983874	181.667	0.237443	181.662	0.106531	181.668	0.0894834
181.758	0.0980343	181.765	0.238284	181.76	0.112257	181.766	0.0888488
181.856	0.0981638	181.863	0.23842	181.858	0.118778	181.863	0.0879753
181.953	0.0980542	181.96	0.237895	181.955	0.126072	181.961	0.0869881
182.051	0.0979417	182.058	0.237049	182.053	0.133902	182.059	0.0859556
182.148	0.0978034	182.156	0.235849	182.15	0.14248	182.156	0.0850006
182.246	0.0979722	182.253	0.234477	182.248	0.151773	182.254	0.0835669
182.344	0.0981987	182.351	0.232936	182.346	0.161794	182.352	0.0817307
182.441	0.0987958	182.448	0.231421	182.443	0.172078	182.449	0.079651
182.539	0.0995496	182.546	0.229844	182.541	0.182226	182.547	0.07745
182.636	0.100375	182.644	0.228118	182.639	0.192285	182.644	0.0749391
182.734	0.101246	182.741	0.226403	182.736	0.20181	182.742	0.0724222
182.832	0.102249	182.839	0.224825	182.834	0.210802	182.84	0.0699963
182.929	0.103453	182.936	0.223454	182.931	0.219344	182.937	0.0674849
183.027	0.104633	183.034	0.222274	183.029	0.227436	183.035	0.0647791
183.125	0.105676	183.132	0.221033	183.127	0.234829	183.132	0.0620588
183.222	0.10642	183.229	0.219671	183.224	0.241871	183.23	0.0595902
183.32	0.106941	183.327	0.218137	183.322	0.248066	183.328	0.0571228
183.417	0.106958	183.425	0.216265	183.419	0.253359	183.425	0.0546897
183.515	0.106944	183.522	0.214162	183.517	0.257804	183.523	0.0523817
183.613	0.106468	183.62	0.212099	183.615	0.261752	183.621	0.0506482
183.71	0.10585	183.717	0.210145	183.712	0.265046	183.718	0.0491676
183.808	0.104653	183.815	0.208479	183.81	0.26776	183.816	0.0479449
183.905	0.103547	183.913	0.207078	183.908	0.270053	183.913	0.0466977
184.003	0.102418	184.01	0.205772	184.005	0.272067	184.011	0.0455177
184.101	0.101391	184.108	0.204832	184.103	0.273812	184.109	0.0440938
184.198	0.100041	184.205	0.204177	184.2	0.274838	184.206	0.0427468
184.296	0.0987871	184.303	0.203919	184.298	0.275316	184.304	0.0414518
184.393	0.0971869	184.401	0.203867	184.396	0.27552	184.402	0.0402582
184.491	0.0954563	184.498	0.204301	184.493	0.275631	184.499	0.0388668
184.589	0.0936699	184.596	0.204914	184.591	0.275355	184.597	0.0373503
184.686	0.0920067	184.694	0.20558	184.688	0.275171	184.694	0.0357272
184.784	0.090341	184.791	0.205867	184.786	0.274772	184.792	0.0339464
184.882	0.088702	184.889	0.20575	184.884	0.274226	184.89	0.0323821
184.979	0.0871887	184.986	0.205372	184.981	0.273443	184.987	0.0309286
185.077	0.0859848	185.084	0.204914	185.079	0.272595	185.085	0.0296065
185.174	0.0850841	185.182	0.204404	185.177	0.271641	185.182	0.0281069
185.272	0.0843735	185.279	0.20389	185.274	0.270869	185.28	0.0264733
185.37	0.0840849	185.377	0.203694	185.372	0.270328	185.378	0.0248168
185.467	0.0837483	185.474	0.203656	185.469	0.269832	185.475	0.0232258
185.565	0.0838574	185.572	0.204	185.567	0.269384	185.573	0.0211969
185.662	0.0838729	185.67	0.204333	185.665	0.268852	185.671	0.0187265
185.76	0.0844143	185.767	0.204661	185.762	0.268481	185.768	0.0158452
185.858	0.0847518	185.865	0.204759	185.86	0.268091	185.866	0.0125285
185.955	0.0852762	185.963	0.204901	185.957	0.267547	185.963	0.0089521
186.053	0.0853873	186.06	0.204908	186.055	0.266981	186.061	0.0050595
186.151	0.0855624	186.158	0.204901	186.153	0.266762	186.159	0.0010075
186.248	0.0853712	186.255	0.20481	186.25	0.266799	186.256	-0.00301236
186.346	0.0850923	186.353	0.204383	186.348	0.267049	186.354	-0.00697684
186.443	0.0847785	186.451	0.203601	186.446	0.267362	186.451	-0.0107629
186.541	0.0843085	186.548	0.202707	186.543	0.267975	186.549	-0.0143845
186.639	0.0837725	186.646	0.201968	186.641	0.268797	186.647	-0.017675
186.736	0.0830372	186.743	0.201573	186.738	0.269949	186.744	-0.0208679
186.834	0.0824372	186.841	0.201735	186.836	0.271158	186.842	-0.0241898
186.931	0.0816607	186.939	0.202291	186.934	0.27261	186.94	-0.0276812
187.029	0.081228	187.036	0.202958	187.031	0.274269	187.037	-0.0311138
187.127	0.0809898	187.134	0.203837	187.129	0.27607	187.135	-0.0343591
187.224	0.0810485	187.232	0.204689	187.226	0.277969	187.232	-0.0373879
187.322	0.0810257	187.329	0.205741	187.324	0.279904	187.33	-0.0405263
187.42	0.0814181	187.427	0.206998	187.422	0.281782	187.428	-0.0438109
187.517	0.0819682	187.524	0.207824	187.519	0.283387	187.525	-0.0469992
187.615	0.0829591	187.622	0.208466	187.617	0.285022	187.623	-0.0500149
187.712	0.083937	187.72	0.209071	187.715	0.286397	187.72	-0.0523774
187.81	0.0853683	187.817	0.209758	187.812	0.287524	187.818	-0.0540056
187.908	0.0869224	187.915	0.210202	187.91	0.288541	187.916	-0.0551695
188.005	0.0889834	188.012	0.21072	188.007	0.289336	188.013	-0.0558443
188.103	0.0912049	188.11	0.211094	188.105	0.28969	188.111	-0.0562337
188.2	0.0938004	188.208	0.211486	188.203	0.289669	188.209	-0.0564134
188.298	0.0970288	188.305	0.212041	188.3	0.289067	188.306	-0.0562785
188.396	0.100365	188.403	0.212572	188.398	0.288186	188.404	-0.0559754
188.493	0.103884	188.501	0.213668	188.495	0.287284	188.501	-0.05549
188.591	0.107551	188.598	0.21489	188.593	0.286342	188.599	-0.054945
188.688	0.111495	188.696	0.215928	188.691	0.285503	188.697	-0.0544267
188.786	0.115015	188.793	0.216647	188.788	0.285096	188.794	-0.0538931
188.884	0.118577	188.891	0.217323	188.886	0.284808	188.892	-0.0530746
188.981	0.121399	188.989	0.21794	188.984	0.284727	188.989	-0.0521859
189.079	0.123686	189.086	0.218552	189.081	0.284978	189.087	-0.051348
189.177	0.125334	189.184	0.219125	189.179	0.285501	189.185	-0.050428
189.274	0.126604	189.281	0.219137	189.276	0.28655	189.282	-0.0493989
189.372	0.127383	189.379	0.218666	189.374	0.287918	189.38	-0.048073
189.469	0.127704	189.477	0.217735	189.472	0.289564	189.478	-0.0463388
189.567	0.127181	189.574	0.216528	189.569	0.29126	189.575	-0.0443419
189.665	0.126227	189.672	0.215057	189.667	0.293116	189.673	-0.0425624
189.762	0.124811	189.77	0.213375	189.764	0.294936	189.77	-0.0409605
189.86	0.122896	189.867	0.211637	189.862	0.296819	189.868	-0.0391987
189.957	0.120712	189.965	0.209596	189.96	0.298618	189.966	-0.0372197
190.055	0.118345	190.062	0.207223	190.057	0.300478	190.063	-0.0346656
190.153	0.115963	190.16	0.204555	190.155	0.302356	190.161	-0.0319547
190.25	0.11311	190.258	0.201958	190.253	0.304354	190.258	-0.0292818
190.348	0.110213	190.355	0.199428	190.35	0.306557	190.356	-0.0266128
190.446	0.107207	190.453	0.196349	190.448	0.308758	190.454	-0.0238304
190.543	0.104383	190.55	0.192967	190.545	0.310837	190.551	-0.0209216
190.641	0.101411	190.648	0.18977	190.643	0.312778	190.649	-0.0177431
190.738	0.0989389	190.746	0.186657	190.741	0.314519	190.747	-0.0141452
190.836	0.0966757	190.843	0.183294	190.838	0.316407	190.844	-0.0104699
190.934	0.095059	190.941	0.179966	190.936	0.318194	190.942	-0.00667201
191.031	0.0939493	191.039	0.176511	191.033	0.319594	191.039	-0.00271345
191.129	0.0934599	191.136	0.173148	191.131	0.320693	191.137	0.00114491
191.226	0.0935185	191.234	0.1699	191.229	0.321043	191.235	0.00548355
191.324	0.0941307	191.331	0.166814	191.326	0.320918	191.332	0.0101169
191.422	0.0952128	191.429	0.164129	191.424	0.320362	191.43	0.0146618
191.519	0.0969265	191.527	0.161606	191.522	0.319544	191.527	0.0193856
191.617	0.0991829	191.624	0.159061	191.619	0.318231	191.625	0.0244181
191.715	0.101799	191.722	0.156576	191.717	0.316628	191.723	0.0296539
191.812	0.104862	191.819	0.154296	191.814	0.314504	191.82	0.0349273
191.91	0.107986	191.917	0.15241	191.912	0.312168	191.918	0.0403386
192.007	0.11125	192.015	0.151035	192.01	0.309807	192.016	0.0454061
192.105	0.114063	192.112	0.149986	192.107	0.307618	192.113	0.0505256
192.203	0.11686	192.21	0.149293	192.205	0.305678	192.211	0.0553382
192.3	0.119097	192.308	0.149086	192.302	0.303822	192.308	0.06004
192.398	0.121164	192.405	0.149321	192.4	0.30196	192.406	0.0645157
192.495	0.122651	192.503	0.150016	192.498	0.300274	192.504	0.0685169
192.593	0.123988	192.6	0.150973	192.595	0.298787	192.601	0.0719863
192.691	0.124559	192.698	0.15212	192.693	0.297431	192.699	0.0748279
192.788	0.124672	192.796	0.153383	192.791	0.296066	192.796	0.0771697
192.886	0.12408	192.893	0.154494	192.888	0.294972	192.894	0.0787589
192.983	0.123165	192.991	0.155527	192.986	0.294091	192.992	0.0798371
193.081	0.121981	193.088	0.156364	193.083	0.293317	193.089	0.0804958
193.179	0.120388	193.186	0.157026	193.181	0.293011	193.187	0.0805955
193.276	0.118584	193.284	0.157476	193.279	0.293199	193.285	0.0798975
193.374	0.116625	193.381	0.157719	193.376	0.293919	193.382	0.0787285
193.472	0.114596	193.479	0.157789	193.474	0.295062	193.48	0.0770547
193.569	0.112392	193.577	0.157565	193.571	0.296634	193.577	0.0749602
193.667	0.110089	193.674	0.157188	193.669	0.298781	193.675	0.0724607
193.764	0.107792	193.772	0.156645	193.767	0.301499	193.773	0.0694082
193.862	0.105459	193.869	0.155658	193.864	0.304465	193.87	0.0661328
193.96	0.103169	193.967	0.154526	193.962	0.307709	193.968	0.0626816
194.057	0.101023	194.065	0.153304	194.06	0.310877	194.066	0.05909
194.155	0.09892	194.162	0.151636	194.157	0.314159	194.163	0.0556625
194.252	0.0972267	194.26	0.149667	194.255	0.317411	194.261	0.052344
194.35	0.0954883	194.358	0.147502	194.352	0.320602	194.358	0.0491482
194.448	0.0937921	194.455	0.145408	194.45	0.32349	194.456	0.0462014
194.545	0.0919441	194.553	0.143391	194.548	0.32614	194.554	0.0435323
194.643	0.0903449	194.65	0.141535	194.645	0.328333	194.651	0.0411351
194.741	0.0889892	194.748	0.139965	194.743	0.329989	194.749	0.0390888
194.838	0.0880274	194.846	0.138886	194.84	0.331172	194.846	0.0372983
194.936	0.0869088	194.943	0.138126	194.938	0.33196	194.944	0.035715
195.033	0.0858388	195.041	0.137905	195.036	0.332355	195.042	0.034313
[truncated: 11,332 more rows]

## Sheet: TqCaFLITS
Fly 0 time (s)	Fly 0 Lifetime (ns)	Fly 1 time (s)	Fly 1 Lifetime (ns)	Fly 2 time (s)	Fly 2 Lifetime (ns)	Fly 3 time (s)	Fly 3 Lifetime (ns)	Fly 4 time (s)	Fly 4 Lifetime (ns)
0	1.93993	0	1.96284	0	1.84208	0	1.93538	0	2.00838
0.097613	1.93904	0.0976129	1.96174	0.0976126	1.84033	0.097613	1.93404	0.0976259	2.0069
0.195238	1.93831	0.195226	1.96033	0.195212	1.84254	0.195239	1.93259	0.195239	2.00521
0.292851	1.93755	0.292839	1.95868	0.292824	1.85106	0.292852	1.93105	0.292865	2.00337
0.390464	1.93663	0.390452	1.95685	0.390436	1.86471	0.390478	1.92937	0.390476	2.00148
0.488077	1.93562	0.488064	1.95486	0.488049	1.8809	0.488103	1.92768	0.488089	1.99937
0.58569	1.93464	0.585677	1.95261	0.585662	1.89709	0.585716	1.92615	0.585715	1.99717
0.683303	1.93366	0.683302	1.95032	0.683274	1.91138	0.683342	1.92464	0.683328	1.99484
0.780916	1.93268	0.780915	1.9482	0.780887	1.9233	0.780955	1.92332	0.780954	1.99272
0.878541	1.93168	0.878528	1.94618	0.878486	1.93342	0.878581	1.922	0.878567	1.99078
0.976154	1.93057	0.976141	1.94427	0.976099	1.94217	0.976206	1.92088	0.976179	1.98883
1.07377	1.92901	1.07375	1.9422	1.07371	1.9512	1.07382	1.91926	1.0738	1.9864
1.17138	1.9272	1.17137	1.93984	1.17132	1.9611	1.17145	1.91767	1.17142	1.9839
1.26899	1.92528	1.26898	1.93701	1.26894	1.97087	1.26907	1.91606	1.26903	1.98113
1.36661	1.92325	1.36659	1.93414	1.36655	1.97958	1.36668	1.91423	1.36666	1.97797
1.46422	1.92111	1.4642	1.93114	1.46416	1.98745	1.46431	1.91225	1.46427	1.97449
1.56183	1.91891	1.56182	1.92804	1.56177	1.99562	1.56192	1.90994	1.56189	1.97073
1.65946	1.91666	1.65943	1.92497	1.65937	2.00436	1.65955	1.90776	1.65951	1.96683
1.75707	1.91464	1.75704	1.92221	1.75698	2.01361	1.75717	1.90525	1.75712	1.96295
1.85468	1.91257	1.85466	1.9195	1.8546	2.02337	1.85479	1.90271	1.85475	1.95918
1.9523	1.91029	1.95227	1.91662	1.95221	2.03363	1.95241	1.90027	1.95236	1.95557
2.04991	1.90795	2.04988	1.91368	2.04982	2.04325	2.05003	1.89787	2.04998	1.95203
2.14752	1.90549	2.14749	1.91124	2.14744	2.05011	2.14765	1.89545	2.1476	1.94862
2.24513	1.903	2.24511	1.90914	2.24505	2.05173	2.24528	1.89312	2.24521	1.94538
2.34276	1.90046	2.34272	1.90738	2.34266	2.04826	2.34289	1.8911	2.34283	1.94225
2.44037	1.89799	2.44033	1.90577	2.44026	2.0404	2.44052	1.88914	2.44045	1.93927
2.53799	1.89538	2.53795	1.9046	2.53787	2.02941	2.53813	1.88739	2.53807	1.93635
2.6356	1.89292	2.63556	1.90349	2.63548	2.01721	2.63575	1.88575	2.63569	1.93375
2.73321	1.89058	2.73317	1.90246	2.7331	2.0048	2.73338	1.88421	2.7333	1.93095
2.83082	1.88828	2.83078	1.90156	2.83071	1.99263	2.83099	1.88289	2.83092	1.92811
2.92844	1.88623	2.92841	1.90075	2.92832	1.98096	2.92862	1.88171	2.92854	1.92539
3.02605	1.88433	3.02602	1.8999	3.02593	1.97055	3.02623	1.8806	3.02615	1.92264
3.12368	1.88258	3.12363	1.89904	3.12355	1.96052	3.12386	1.87958	3.12377	1.91991
3.22129	1.88104	3.22125	1.89863	3.22115	1.95119	3.22147	1.8786	3.22139	1.91733
3.3189	1.87954	3.31886	1.89819	3.31876	1.94355	3.3191	1.87756	3.31901	1.9152
3.41651	1.87796	3.41647	1.89796	3.41637	1.93828	3.41672	1.87668	3.41663	1.91337
3.51413	1.87658	3.51409	1.89759	3.51398	1.93474	3.51434	1.87607	3.51424	1.91185
3.61174	1.87527	3.6117	1.8972	3.6116	1.93184	3.61196	1.8756	3.61186	1.91039
3.70935	1.87388	3.70931	1.89676	3.70921	1.92944	3.70957	1.87548	3.70948	1.90921
3.80697	1.87259	3.80692	1.89639	3.80682	1.92668	3.8072	1.87547	3.8071	1.9082
3.90459	1.87146	3.90454	1.89627	3.90443	1.92246	3.90483	1.8757	3.90472	1.90726
4.0022	1.87039	4.00215	1.89614	4.00203	1.91615	4.00244	1.87604	4.00233	1.90631
4.09982	1.86946	4.09976	1.8957	4.09965	1.90921	4.10006	1.87657	4.09995	1.90543
4.19743	1.86849	4.19738	1.89504	4.19726	1.90324	4.19768	1.87724	4.19757	1.90458
4.29504	1.86774	4.29499	1.89399	4.29487	1.89905	4.2953	1.87792	4.29518	1.9036
4.39266	1.86715	4.3926	1.89302	4.39248	1.89625	4.39292	1.87873	4.39281	1.90253
4.49027	1.86683	4.49021	1.89202	4.4901	1.89409	4.49054	1.87923	4.49042	1.90178
4.58788	1.86665	4.58783	1.89124	4.58771	1.89302	4.58817	1.87984	4.58804	1.90091
4.68549	1.86668	4.68544	1.89039	4.68532	1.89376	4.68578	1.88018	4.68566	1.9002
4.78312	1.86689	4.78305	1.88983	4.78292	1.89701	4.78341	1.88034	4.78327	1.89965
4.88073	1.8671	4.88067	1.8893	4.88053	1.90286	4.88102	1.88019	4.88089	1.89934
4.97835	1.86743	4.97828	1.88891	4.97814	1.91036	4.97864	1.88009	4.97851	1.89914
5.07596	1.86779	5.07589	1.88863	5.07576	1.9187	5.07627	1.87981	5.07612	1.89899
5.17357	1.86837	5.1735	1.88842	5.17337	1.92755	5.17388	1.8793	5.17375	1.8989
5.27118	1.86891	5.27112	1.88844	5.27098	1.93578	5.27151	1.8789	5.27136	1.89877
5.3688	1.86946	5.36873	1.88838	5.36859	1.9423	5.36912	1.87849	5.36898	1.89866
5.46641	1.86977	5.46634	1.88842	5.46621	1.94674	5.46675	1.87806	5.4666	1.89826
5.56402	1.87026	5.56397	1.88825	5.56381	1.94914	5.56436	1.87746	5.56421	1.89792
5.66165	1.87084	5.66158	1.88811	5.66142	1.94918	5.66199	1.87681	5.66183	1.89749
5.75926	1.87141	5.75919	1.88777	5.75903	1.94686	5.75961	1.87606	5.75945	1.8968
5.85687	1.87195	5.85681	1.88712	5.85664	1.94299	5.85722	1.87523	5.85706	1.89603
5.95449	1.87254	5.95442	1.88654	5.95426	1.9391	5.95485	1.87425	5.95469	1.89539
6.0521	1.87312	6.05203	1.88604	6.05187	1.93546	6.05246	1.87333	6.0523	1.89459
6.14971	1.87376	6.14964	1.88569	6.14948	1.9323	6.15009	1.87231	6.14992	1.89376
6.24733	1.87459	6.24726	1.8855	6.24709	1.9293	6.2477	1.87119	6.24754	1.893
6.34494	1.87543	6.34487	1.88506	6.34471	1.92741	6.34533	1.86992	6.34515	1.89261
6.44255	1.87627	6.44248	1.88455	6.44231	1.92735	6.44295	1.86874	6.44278	1.89212
6.54018	1.87682	6.5401	1.88416	6.53992	1.92786	6.54057	1.86757	6.54039	1.89176
6.63779	1.8771	6.63771	1.88386	6.63753	1.92761	6.63819	1.86656	6.638	1.89143
6.7354	1.87718	6.73532	1.88319	6.73514	1.92499	6.73581	1.86563	6.73563	1.89107
6.83302	1.87708	6.83293	1.88237	6.83276	1.91946	6.83343	1.86477	6.83324	1.89055
6.93063	1.87679	6.93055	1.88135	6.93037	1.91119	6.93104	1.86384	6.93087	1.89013
7.02824	1.87655	7.02816	1.8802	7.02798	1.90163	7.02867	1.86294	7.02848	1.88988
7.12585	1.87596	7.12577	1.87842	7.12559	1.89146	7.12628	1.86233	7.12609	1.88971
7.22347	1.87531	7.22338	1.87631	7.22319	1.88262	7.22391	1.86167	7.22372	1.88944
7.32108	1.87467	7.321	1.87414	7.3208	1.87697	7.32153	1.86088	7.32133	1.88886
7.41871	1.87406	7.41861	1.87207	7.41842	1.87529	7.41915	1.86002	7.41894	1.88844
7.51632	1.87342	7.51622	1.86991	7.51603	1.87735	7.51677	1.85922	7.51657	1.88796
7.61393	1.87271	7.61384	1.86767	7.61364	1.88261	7.61439	1.85846	7.61418	1.88748
7.71154	1.87213	7.71145	1.8656	7.71126	1.89137	7.71201	1.85779	7.71179	1.88734
7.80916	1.87172	7.80906	1.8638	7.80887	1.90325	7.80962	1.85703	7.80942	1.88743
7.90677	1.87124	7.90667	1.86221	7.90648	1.91666	7.90725	1.85646	7.90703	1.88742
8.00438	1.87057	8.00429	1.8607	8.00408	1.93087	8.00488	1.85572	8.00466	1.88745
8.10199	1.87008	8.1019	1.85938	8.10169	1.94495	8.10249	1.855	8.10227	1.88747
8.19961	1.86933	8.19951	1.85831	8.1993	1.95706	8.20011	1.85432	8.19988	1.88785
8.29722	1.86846	8.29713	1.85766	8.29692	1.96501	8.29773	1.85394	8.29751	1.88807
8.39485	1.86746	8.39474	1.85682	8.39453	1.96833	8.39535	1.85365	8.39512	1.88824
8.49246	1.86663	8.49235	1.85585	8.49214	1.96844	8.49297	1.85319	8.49273	1.88842
8.59007	1.86591	8.58998	1.85471	8.58975	1.96696	8.59059	1.85269	8.59036	1.88875
8.68768	1.86505	8.68759	1.85375	8.68737	1.9651	8.6882	1.8521	8.68797	1.88885
8.7853	1.86421	8.7852	1.8529	8.78498	1.96267	8.78583	1.85156	8.7856	1.88895
8.88291	1.86321	8.88282	1.85209	8.88258	1.95986	8.88346	1.85087	8.88321	1.88896
8.98052	1.86226	8.98043	1.85124	8.98019	1.95574	8.98107	1.85048	8.98082	1.88889
9.07814	1.86146	9.07804	1.85072	9.0778	1.95103	9.07869	1.84997	9.07845	1.88881
9.17575	1.86073	9.17565	1.85033	9.17542	1.94542	9.17631	1.84955	9.17606	1.88862
9.27336	1.86005	9.27327	1.84985	9.27303	1.93867	9.27393	1.84919	9.27367	1.88861
9.37099	1.85935	9.37088	1.84926	9.37064	1.93036	9.37155	1.84886	9.3713	1.88863
9.4686	1.85854	9.46849	1.84895	9.46825	1.92066	9.46917	1.84865	9.46891	1.88883
9.56621	1.85766	9.5661	1.84866	9.56587	1.90959	9.56678	1.8486	9.56652	1.88912
9.66383	1.85679	9.66372	1.84849	9.66347	1.89676	9.66441	1.84871	9.66415	1.88959
9.76144	1.85567	9.76133	1.84829	9.76108	1.88256	9.76202	1.84896	9.76176	1.88993
9.85905	1.85462	9.85894	1.84821	9.85869	1.86836	9.85965	1.84936	9.85939	1.89029
9.95666	1.85362	9.95656	1.84814	9.9563	1.85479	9.95728	1.84978	9.957	1.89096
10.0543	1.85239	10.0542	1.8479	10.0539	1.84183	10.0549	1.85029	10.0546	1.89186
10.1519	1.85116	10.1518	1.84745	10.1515	1.83063	10.1525	1.85088	10.1522	1.89256
10.2495	1.84987	10.2494	1.84682	10.2491	1.82229	10.2501	1.8514	10.2499	1.89335
10.3471	1.84852	10.347	1.84652	10.3468	1.81711	10.3478	1.8521	10.3475	1.89432
10.4447	1.84697	10.4446	1.84607	10.4444	1.81387	10.4454	1.85297	10.4451	1.89511
10.5424	1.84528	10.5422	1.84581	10.542	1.81149	10.543	1.85382	10.5427	1.89578
10.64	1.84362	10.6398	1.8452	10.6396	1.80962	10.6406	1.85489	10.6403	1.89644
10.7376	1.84199	10.7375	1.84442	10.7372	1.80859	10.7382	1.85609	10.7379	1.89716
10.8352	1.84054	10.8351	1.84325	10.8348	1.80825	10.8358	1.85738	10.8356	1.89806
10.9328	1.83896	10.9327	1.84221	10.9324	1.80884	10.9335	1.85854	10.9332	1.89876
11.0304	1.83701	11.0303	1.84116	11.03	1.80995	11.0311	1.85984	11.0308	1.89934
11.128	1.83503	11.1279	1.84006	11.1276	1.81107	11.1287	1.86131	11.1284	1.90007
11.2256	1.83312	11.2255	1.83887	11.2253	1.81086	11.2263	1.86286	11.226	1.9008
11.3233	1.83117	11.3231	1.83744	11.3229	1.80899	11.3239	1.86458	11.3236	1.90152
11.4209	1.82918	11.4207	1.83586	11.4205	1.80697	11.4216	1.86647	11.4213	1.90213
11.5185	1.82743	11.5184	1.83415	11.5181	1.80565	11.5192	1.86832	11.5189	1.90263
11.6161	1.82549	11.616	1.83247	11.6157	1.80561	11.6168	1.87009	11.6165	1.90298
11.7137	1.8236	11.7136	1.83084	11.7133	1.80643	11.7144	1.87219	11.7141	1.90342
11.8113	1.82167	11.8112	1.8291	11.8109	1.80718	11.812	1.87443	11.8117	1.90389
11.9089	1.81985	11.9088	1.82731	11.9085	1.80743	11.9097	1.87688	11.9093	1.90432
12.0066	1.81823	12.0064	1.82542	12.0061	1.80712	12.0073	1.8794	12.007	1.90458
12.1042	1.81648	12.1041	1.82339	12.1038	1.80701	12.1049	1.882	12.1046	1.90485
12.2018	1.81478	12.2017	1.82162	12.2014	1.80833	12.2025	1.88468	12.2022	1.90501
12.2994	1.8132	12.2993	1.81985	12.299	1.81099	12.3001	1.8871	12.2998	1.90508
12.397	1.8118	12.3969	1.8184	12.3966	1.8142	12.3978	1.88951	12.3974	1.90529
12.4946	1.81045	12.4945	1.81691	12.4942	1.81764	12.4954	1.89191	12.495	1.90542
12.5923	1.80948	12.5921	1.81567	12.5918	1.82084	12.593	1.89424	12.5927	1.90575
12.6899	1.8086	12.6897	1.81466	12.6894	1.82343	12.6906	1.89638	12.6903	1.90602
12.7875	1.80771	12.7873	1.81398	12.787	1.82512	12.7882	1.89844	12.7879	1.90607
12.8851	1.80675	12.885	1.81323	12.8846	1.82623	12.8859	1.90049	12.8855	1.90604
12.9827	1.80609	12.9826	1.81256	12.9823	1.82711	12.9835	1.90244	12.9831	1.90601
13.0803	1.80569	13.0802	1.81219	13.0799	1.82757	13.0811	1.90412	13.0808	1.90588
13.1779	1.80518	13.1778	1.81169	13.1775	1.82812	13.1787	1.90577	13.1784	1.90571
13.2755	1.80481	13.2754	1.81137	13.2751	1.82974	13.2763	1.9073	13.276	1.90549
13.3732	1.80464	13.373	1.81087	13.3727	1.83125	13.374	1.90854	13.3736	1.90513
13.4708	1.80445	13.4706	1.81057	13.4703	1.83194	13.4716	1.9098	13.4712	1.90475
13.5684	1.80418	13.5682	1.81025	13.5679	1.83165	13.5692	1.91108	13.5688	1.90424
13.666	1.80388	13.6659	1.80982	13.6655	1.8311	13.6668	1.91212	13.6665	1.9036
13.7636	1.80368	13.7635	1.80947	13.7631	1.83126	13.7644	1.91295	13.7641	1.90305
13.8612	1.80353	13.8611	1.80917	13.8607	1.832	13.8621	1.91362	13.8617	1.90249
13.9588	1.80344	13.9587	1.80918	13.9584	1.83295	13.9597	1.91422	13.9593	1.90195
14.0565	1.80333	14.0563	1.80958	14.056	1.83288	14.0573	1.91473	14.0569	1.90132
14.1541	1.80328	14.1539	1.81003	14.1536	1.8302	14.1549	1.91502	14.1545	1.90066
14.2517	1.80322	14.2515	1.81047	14.2512	1.82411	14.2525	1.91528	14.2522	1.89993
14.3493	1.80307	14.3491	1.81119	14.3488	1.81617	14.3502	1.91553	14.3498	1.89944
14.4469	1.80285	14.4468	1.81194	14.4464	1.80761	14.4478	1.91572	14.4474	1.89905
14.5445	1.80237	14.5444	1.81252	14.544	1.79879	14.5454	1.91576	14.545	1.89861
14.6421	1.8019	14.642	1.81303	14.6416	1.79028	14.643	1.91581	14.6426	1.89839
14.7397	1.80139	14.7396	1.81356	14.7392	1.78218	14.7406	1.91599	14.7402	1.89816
14.8374	1.80102	14.8372	1.8143	14.8369	1.77446	14.8383	1.91612	14.8379	1.89807
14.935	1.80057	14.9348	1.81499	14.9345	1.76678	14.9359	1.9161	14.9355	1.89805
15.0326	1.79998	15.0324	1.81522	15.0321	1.75939	15.0335	1.91618	15.0331	1.89813
15.1302	1.79948	15.13	1.81578	15.1297	1.75195	15.1311	1.91614	15.1307	1.89823
15.2278	1.79896	15.2277	1.81648	15.2273	1.74363	15.2287	1.91617	15.2283	1.89843
15.3254	1.7984	15.3253	1.81727	15.3249	1.73445	15.3264	1.9162	15.3259	1.89855
15.423	1.7978	15.4229	1.81801	15.4225	1.72538	15.424	1.91604	15.4236	1.89882
15.5207	1.79736	15.5205	1.81893	15.5201	1.71683	15.5216	1.91587	15.5212	1.89908
15.6183	1.7969	15.6181	1.81989	15.6177	1.70829	15.6192	1.91556	15.6188	1.89925
15.7159	1.79643	15.7157	1.82079	15.7154	1.69937	15.7168	1.91508	15.7164	1.89931
15.8135	1.79584	15.8133	1.82158	15.813	1.6908	15.8144	1.91464	15.814	1.89926
15.9111	1.79515	15.911	1.82208	15.9106	1.68313	15.9121	1.91411	15.9116	1.89924
16.0087	1.7947	16.0086	1.82246	16.0082	1.67671	16.0097	1.91338	16.0093	1.89931
16.1063	1.79425	16.1062	1.82227	16.1058	1.6727	16.1073	1.91274	16.1069	1.89957
16.204	1.79374	16.2038	1.82193	16.2034	1.67231	16.2049	1.91216	16.2045	1.89984
16.3016	1.79318	16.3014	1.82097	16.301	1.67485	16.3026	1.91151	16.3021	1.89996
16.3992	1.79288	16.399	1.81976	16.3986	1.67837	16.4002	1.91106	16.3997	1.90002
16.4968	1.7927	16.4966	1.8185	16.4962	1.68237	16.4978	1.9106	16.4974	1.90009
16.5944	1.79258	16.5943	1.81713	16.5939	1.68664	16.5954	1.91019	16.595	1.89996
16.692	1.79247	16.6919	1.81576	16.6915	1.69144	16.693	1.90977	16.6926	1.8999
16.7896	1.7923	16.7895	1.8143	16.7891	1.69656	16.7906	1.90931	16.7902	1.89998
16.8873	1.79221	16.8871	1.81321	16.8867	1.70164	16.8883	1.90895	16.8878	1.89986
16.9849	1.79197	16.9847	1.81234	16.9843	1.70723	16.9859	1.90867	16.9854	1.89963
17.0825	1.79172	17.0823	1.81164	17.0819	1.71252	17.0835	1.90851	17.0831	1.8993
17.1801	1.79142	17.1799	1.81097	17.1795	1.71727	17.1811	1.90819	17.1807	1.89901
17.2777	1.79114	17.2775	1.81079	17.2771	1.72273	17.2787	1.90793	17.2783	1.89886
17.3753	1.79074	17.3752	1.81067	17.3747	1.7308	17.3764	1.90759	17.3759	1.89861
17.4729	1.79025	17.4728	1.81059	17.4724	1.7416	17.474	1.90724	17.4735	1.89836
17.5705	1.78999	17.5704	1.81057	17.57	1.75502	17.5716	1.90691	17.5711	1.89843
17.6682	1.78971	17.668	1.81062	17.6676	1.76999	17.6692	1.90658	17.6688	1.89864
17.7658	1.7895	17.7656	1.81087	17.7652	1.78462	17.7668	1.90609	17.7664	1.89875
17.8634	1.78926	17.8632	1.81129	17.8628	1.79775	17.8645	1.90552	17.864	1.89885
17.961	1.7889	17.9608	1.81175	17.9604	1.80882	17.9621	1.90494	17.9616	1.89895
18.0586	1.78858	18.0584	1.81259	18.058	1.81862	18.0597	1.90418	18.0592	1.89884
18.1562	1.78838	18.1561	1.81354	18.1556	1.82754	18.1573	1.90333	18.1568	1.89878
18.2538	1.78809	18.2537	1.81464	18.2532	1.83492	18.2549	1.90235	18.2545	1.89856
18.3515	1.7876	18.3513	1.81607	18.3509	1.84043	18.3526	1.90121	18.3521	1.89835
18.4491	1.78715	18.4489	1.81772	18.4485	1.84412	18.4502	1.90002	18.4497	1.89818
18.5467	1.78642	18.5465	1.81973	18.5461	1.84515	18.5478	1.89872	18.5473	1.89799
18.6443	1.78563	18.6441	1.82167	18.6437	1.84338	18.6454	1.89725	18.6449	1.89756
18.7419	1.785	18.7417	1.82358	18.7413	1.8398	18.743	1.89576	18.7425	1.89694
18.8395	1.78437	18.8393	1.82498	18.8389	1.8358	18.8407	1.89426	18.8402	1.89664
18.9371	1.78391	18.937	1.82644	18.9365	1.83149	18.9383	1.89268	18.9378	1.89636
19.0347	1.78332	19.0346	1.82796	19.0341	1.82819	19.0359	1.89091	19.0354	1.89635
19.1324	1.78271	19.1322	1.82921	19.1317	1.82657	19.1335	1.88911	19.133	1.89614
19.23	1.78224	19.2298	1.83	19.2294	1.82638	19.2311	1.88709	19.2306	1.89605
19.3276	1.78185	19.3274	1.83068	19.327	1.82577	19.3287	1.88506	19.3282	1.89606
19.4252	1.78142	19.425	1.83119	19.4246	1.82478	19.4264	1.88282	19.4259	1.89602
19.5228	1.78087	19.5226	1.8317	19.5222	1.82416	19.524	1.88061	19.5235	1.89573
19.6204	1.78035	19.6202	1.83198	19.6198	1.82493	19.6216	1.87843	19.6211	1.89553
19.7181	1.77967	19.7179	1.83206	19.7174	1.82717	19.7192	1.87634	19.7187	1.89562
19.8157	1.77903	19.8155	1.83208	19.815	1.8304	19.8168	1.87414	19.8163	1.89558
19.9133	1.77839	19.9131	1.83204	19.9126	1.83498	19.9145	1.87191	19.914	1.89574
20.0109	1.77772	20.0107	1.83171	20.0102	1.8398	20.0121	1.86975	20.0116	1.89593
20.1085	1.77699	20.1083	1.83138	20.1079	1.844	20.1097	1.8677	20.1092	1.89612
20.2061	1.7763	20.2059	1.83112	20.2055	1.84705	20.2073	1.8658	20.2068	1.89639
20.3037	1.77572	20.3035	1.83051	20.3031	1.84912	20.3049	1.86393	20.3044	1.89659
20.4013	1.7751	20.4012	1.82995	20.4007	1.85041	20.4026	1.86203	20.402	1.897
20.499	1.77471	20.4988	1.82906	20.4983	1.85267	20.5002	1.86022	20.4997	1.89749
20.5966	1.77448	20.5964	1.82822	20.5959	1.85704	20.5978	1.85846	20.5973	1.89812
20.6942	1.77416	20.694	1.82744	20.6935	1.86342	20.6954	1.85659	20.6949	1.89876
20.7918	1.77394	20.7916	1.82694	20.7911	1.8712	20.793	1.85473	20.7925	1.89943
20.8894	1.77377	20.8892	1.82633	20.8887	1.87957	20.8907	1.85293	20.8901	1.90003
20.987	1.77368	20.9868	1.82552	20.9864	1.88742	20.9883	1.85123	20.9877	1.90035
21.0846	1.77374	21.0845	1.82489	21.084	1.89391	21.0859	1.84953	21.0854	1.90079
21.1823	1.77371	21.1821	1.82431	21.1816	1.89857	21.1835	1.84805	21.183	1.90108
21.2799	1.77372	21.2797	1.82383	21.2792	1.90175	21.2811	1.84664	21.2806	1.90143
21.3775	1.77385	21.3773	1.8231	21.3768	1.90319	21.3788	1.84548	21.3782	1.90172
21.4751	1.77408	21.4749	1.82245	21.4744	1.90173	21.4764	1.84427	21.4758	1.90222
21.5727	1.7742	21.5725	1.82196	21.572	1.89628	21.574	1.84303	21.5734	1.90257
21.6703	1.77449	21.6701	1.82143	21.6696	1.88945	21.6716	1.8419	21.6711	1.90289
21.7679	1.77477	21.7677	1.82081	21.7672	1.88438	21.7692	1.84094	21.7687	1.90343
21.8655	1.77506	21.8654	1.82005	21.8649	1.88217	21.8668	1.84006	21.8663	1.90389
21.9632	1.77554	21.963	1.81931	21.9625	1.88249	21.9645	1.83926	21.9639	1.90454
22.0608	1.77594	22.0606	1.8183	22.0601	1.88426	22.0621	1.83844	22.0615	1.90521
22.1584	1.77647	22.1582	1.81732	22.1577	1.8876	22.1597	1.83753	22.1591	1.90591
22.256	1.77702	22.2558	1.81648	22.2553	1.89306	22.2573	1.83662	22.2568	1.90663
22.3536	1.77747	22.3534	1.81555	22.3529	1.90006	22.3549	1.83586	22.3544	1.90718
22.4512	1.77769	22.451	1.81461	22.4505	1.90745	22.4526	1.83512	22.452	1.90758
22.5488	1.77779	22.5486	1.81347	22.5481	1.91425	22.5502	1.83444	22.5496	1.9081
22.6465	1.77785	22.6463	1.81228	22.6458	1.91912	22.6478	1.83381	22.6472	1.90866
22.7441	1.77772	22.7439	1.81092	22.7434	1.92123	22.7454	1.83324	22.7448	1.90891
22.8417	1.77738	22.8415	1.80955	22.841	1.92064	22.843	1.83273	22.8425	1.90922
22.9393	1.77699	22.9391	1.80823	22.9386	1.91876	22.9407	1.83235	22.9401	1.90957
23.0369	1.77646	23.0367	1.80707	23.0362	1.91724	23.0383	1.83222	23.0377	1.91
23.1345	1.77587	23.1343	1.80605	23.1338	1.91675	23.1359	1.8321	23.1353	1.91055
23.2321	1.77519	23.2319	1.80495	23.2314	1.91689	23.2335	1.83216	23.2329	1.91094
23.3298	1.77452	23.3295	1.80409	23.329	1.91788	23.3311	1.83217	23.3306	1.91131
23.4274	1.77385	23.4272	1.80296	23.4266	1.91968	23.4288	1.83232	23.4282	1.91176
23.525	1.77324	23.5248	1.80179	23.5243	1.92291	23.5264	1.83254	23.5258	1.91218
23.6226	1.77272	23.6224	1.80058	23.6219	1.92538	23.624	1.8329	23.6234	1.91258
23.7202	1.77221	23.72	1.79952	23.7195	1.92493	23.7216	1.83324	23.721	1.91275
23.8178	1.77184	23.8176	1.79867	23.8171	1.92055	23.8192	1.83362	23.8186	1.91276
23.9154	1.77145	23.9152	1.79804	23.9147	1.91313	23.9168	1.8339	23.9163	1.91252
24.013	1.77128	24.0128	1.79753	24.0123	1.90463	24.0145	1.83402	24.0139	1.91224
24.1107	1.77119	24.1104	1.79709	24.1099	1.89536	24.1121	1.83413	24.1115	1.91196
24.2083	1.77107	24.2081	1.7968	24.2075	1.88538	24.2097	1.83423	24.2091	1.91176
24.3059	1.7711	24.3057	1.79636	24.3051	1.87505	24.3073	1.83428	24.3067	1.91156
24.4035	1.77134	24.4033	1.7961	24.4028	1.86486	24.4049	1.83435	24.4043	1.91148
24.5011	1.77173	24.5009	1.79636	24.5004	1.8546	24.5026	1.83445	24.502	1.91128
24.5987	1.77206	24.5985	1.79674	24.598	1.84554	24.6002	1.83456	24.5996	1.91077
24.6963	1.77252	24.6961	1.79711	24.6956	1.83844	24.6978	1.83461	24.6972	1.9106
24.7939	1.77308	24.7937	1.79737	24.7932	1.83377	24.7954	1.83449	24.7948	1.91067
24.8916	1.77371	24.8914	1.79778	24.8908	1.83074	24.893	1.83429	24.8924	1.91091
24.9892	1.77416	24.989	1.79804	24.9884	1.82706	24.9907	1.83389	24.99	1.91101
25.0868	1.77461	25.0866	1.79825	25.086	1.82224	25.0883	1.83343	25.0877	1.91109
25.1844	1.77505	25.1842	1.79851	25.1836	1.81617	25.1859	1.83287	25.1853	1.91139
25.282	1.77547	25.2818	1.79879	25.2813	1.80841	25.2835	1.83223	25.2829	1.91177
25.3796	1.77592	25.3794	1.79927	25.3789	1.80062	25.3811	1.83146	25.3805	1.91172
25.4772	1.77646	25.477	1.79958	25.4765	1.79475	25.4788	1.83077	25.4781	1.91171
25.5749	1.77692	25.5747	1.79983	25.5741	1.79072	25.5764	1.8299	25.5757	1.91171
25.6725	1.7774	25.6723	1.79993	25.6717	1.78887	25.674	1.82924	25.6734	1.91152
25.7701	1.77781	25.7699	1.8003	25.7693	1.78953	25.7716	1.82877	25.771	1.91133
25.8677	1.77807	25.8675	1.80039	25.8669	1.79175	25.8692	1.82853	25.8686	1.91111
25.9653	1.77843	25.9651	1.80057	25.9645	1.79587	25.9668	1.82861	25.9662	1.91082
26.0629	1.77876	26.0627	1.8006	26.0622	1.80236	26.0645	1.82893	26.0638	1.91036
26.1605	1.77929	26.1603	1.80056	26.1598	1.81094	26.1621	1.82939	26.1614	1.90974
26.2582	1.77976	26.2579	1.80087	26.2574	1.82147	26.2597	1.83002	26.2591	1.90886
26.3558	1.78017	26.3556	1.80115	26.355	1.83302	26.3573	1.83063	26.3567	1.90787
26.4534	1.78036	26.4532	1.80115	26.4526	1.84475	26.4549	1.83146	26.4543	1.90686
26.551	1.78058	26.5508	1.80127	26.5502	1.85661	26.5526	1.83248	26.5519	1.90606
26.6486	1.78074	26.6484	1.80178	26.6478	1.86794	26.6502	1.83365	26.6495	1.90502
26.7462	1.7809	26.746	1.80237	26.7454	1.87772	26.7478	1.83503	26.7472	1.9037
26.8438	1.78118	26.8436	1.80264	26.843	1.88566	26.8454	1.83676	26.8448	1.9023
26.9414	1.7817	26.9412	1.80317	26.9407	1.89218	26.943	1.83866	26.9424	1.90102
27.0391	1.78214	27.0388	1.80362	27.0383	1.89722	27.0407	1.84088	27.04	1.89967
27.1367	1.78262	27.1365	1.80398	27.1359	1.9015	27.1383	1.84321	27.1376	1.89816
27.2343	1.78314	27.2341	1.80431	27.2335	1.90586	27.2359	1.84576	27.2352	1.89692
27.3319	1.78356	27.3317	1.80456	27.3311	1.90995	27.3335	1.84849	27.3329	1.89601
27.4295	1.78397	27.4293	1.80491	27.4287	1.91236	27.4311	1.85131	27.4305	1.89513
27.5271	1.78429	27.5269	1.80551	27.5263	1.91415	27.5288	1.85428	27.5281	1.89428
27.6247	1.78448	27.6245	1.80627	27.6239	1.9152	27.6264	1.8572	27.6257	1.89391
27.7224	1.78463	27.7221	1.80667	27.7215	1.91443	27.724	1.85999	27.7233	1.89377
27.82	1.78469	27.8197	1.8077	27.8192	1.91279	27.8216	1.86251	27.8209	1.89377
27.9176	1.78454	27.9174	1.80868	27.9168	1.90948	27.9192	1.86509	27.9186	1.89374
28.0152	1.78425	28.015	1.8096	28.0144	1.90515	28.0168	1.86751	28.0162	1.89377
28.1128	1.78373	28.1126	1.81073	28.112	1.90111	28.1145	1.86979	28.1138	1.89389
28.2104	1.78303	28.2102	1.81152	28.2096	1.89718	28.2121	1.87204	28.2114	1.89416
28.308	1.78237	28.3078	1.81219	28.3072	1.89224	28.3097	1.8745	28.309	1.89454
28.4056	1.78202	28.4054	1.81306	28.4048	1.88605	28.4073	1.87652	28.4066	1.89507
28.5033	1.78186	28.503	1.81379	28.5024	1.87752	28.5049	1.87853	28.5043	1.89571
28.6009	1.78188	28.6006	1.81422	28.6	1.86792	28.6026	1.88042	28.6019	1.89627
28.6985	1.78181	28.6983	1.81466	28.6976	1.86016	28.7002	1.88212	28.6995	1.89675
28.7961	1.78159	28.7959	1.81498	28.7953	1.85501	28.7978	1.88342	28.7971	1.89726
28.8937	1.78137	28.8935	1.81506	28.8929	1.85308	28.8954	1.88446	28.8947	1.89771
28.9913	1.78139	28.9911	1.8153	28.9905	1.85371	28.993	1.88513	28.9923	1.89832
29.0889	1.78145	29.0887	1.81555	29.0881	1.85508	29.0907	1.88578	29.0899	1.89908
29.1865	1.78153	29.1863	1.81592	29.1857	1.85706	29.1883	1.88625	29.1876	1.89963
29.2842	1.78159	29.2839	1.81635	29.2833	1.85958	29.2859	1.88648	29.2852	1.90011
29.3818	1.78126	29.3816	1.81679	29.3809	1.86197	29.3835	1.88658	29.3828	1.90052
29.4794	1.78107	29.4792	1.81712	29.4785	1.86352	29.4811	1.88645	29.4804	1.90074
29.577	1.78094	29.5768	1.81732	29.5762	1.86452	29.5787	1.88614	29.578	1.90082
29.6746	1.78092	29.6744	1.81764	29.6738	1.86642	29.6764	1.88575	29.6756	1.90079
29.7722	1.78087	29.772	1.81762	29.7714	1.86884	29.774	1.88539	29.7733	1.9006
29.8699	1.7807	29.8696	1.81758	29.869	1.87197	29.8716	1.88473	29.8709	1.9006
29.9675	1.78047	29.9672	1.81763	29.9666	1.87556	29.9692	1.88413	29.9685	1.90063
30.0651	1.78024	30.0649	1.81759	30.0642	1.87824	30.0668	1.88347	30.0661	1.90055
30.1627	1.78021	30.1625	1.8177	30.1618	1.87926	30.1645	1.88269	30.1637	1.90059
30.2603	1.78035	30.2601	1.8178	30.2594	1.87964	30.2621	1.88162	30.2614	1.90059
30.3579	1.78041	30.3577	1.81775	30.357	1.88095	30.3597	1.88083	30.359	1.90044
30.4555	1.78023	30.4553	1.81751	30.4547	1.88467	30.4573	1.87988	30.4566	1.90033
30.5531	1.77982	30.5529	1.81731	30.5523	1.88997	30.5549	1.87895	30.5542	1.90022
30.6508	1.77957	30.6505	1.81714	30.6499	1.89474	30.6525	1.87815	30.6518	1.90033
30.7484	1.77948	30.7481	1.81717	30.7475	1.89892	30.7502	1.8776	30.7494	1.90045
30.846	1.77945	30.8458	1.81723	30.8451	1.90194	30.8478	1.87725	30.8471	1.90048
30.9436	1.77937	30.9434	1.81702	30.9427	1.9039	30.9454	1.87691	30.9447	1.90043
31.0412	1.77927	31.041	1.81674	31.0403	1.90535	31.043	1.8765	31.0423	1.9001
31.1388	1.77911	31.1386	1.81633	31.1379	1.90599	31.1406	1.87586	31.1399	1.89962
31.2364	1.77891	31.2362	1.8158	31.2355	1.90536	31.2383	1.87527	31.2375	1.89913
31.334	1.77895	31.3338	1.81524	31.3332	1.90406	31.3359	1.87453	31.3351	1.89857
31.4317	1.77893	31.4314	1.81476	31.4308	1.90256	31.4335	1.87371	31.4328	1.89796
31.5293	1.77903	31.529	1.81422	31.5284	1.90107	31.5311	1.87288	31.5304	1.8974
31.6269	1.77899	31.6267	1.81362	31.626	1.89952	31.6287	1.87186	31.628	1.89681
31.7245	1.77885	31.7243	1.81305	31.7236	1.89719	31.7264	1.87071	31.7256	1.89636
31.8221	1.77881	31.8219	1.8126	31.8212	1.89343	31.824	1.86958	31.8232	1.89595
31.9197	1.77878	31.9195	1.81233	31.9188	1.88777	31.9216	1.86827	31.9208	1.89566
32.0173	1.77887	32.0171	1.81199	32.0164	1.88104	32.0192	1.86687	32.0185	1.89582
32.1149	1.7788	32.1147	1.81176	32.1141	1.87471	32.1168	1.86565	32.1161	1.89574
32.2126	1.77847	32.2123	1.81179	32.2117	1.86976	32.2144	1.86449	32.2137	1.89575
32.3102	1.778	32.3099	1.81159	32.3093	1.86584	32.3121	1.86307	32.3113	1.89591
32.4078	1.77762	32.4076	1.81164	32.4069	1.86247	32.4097	1.86168	32.4089	1.89606
32.5054	1.77715	32.5052	1.81177	32.5045	1.85933	32.5073	1.86012	32.5065	1.89637
32.603	1.7767	32.6028	1.81183	32.6021	1.85576	32.6049	1.85849	32.6042	1.89655
32.7006	1.77628	32.7004	1.8117	32.6997	1.85185	32.7025	1.8566	32.7018	1.89662
32.7982	1.77576	32.798	1.81135	32.7973	1.84894	32.8002	1.85449	32.7994	1.8968
32.8959	1.77528	32.8956	1.81113	32.8949	1.84764	32.8978	1.8524	32.897	1.8968
32.9935	1.7749	32.9932	1.81104	32.9926	1.84906	32.9954	1.85028	32.9946	1.89682
33.0911	1.77461	33.0909	1.81082	33.0902	1.85163	33.093	1.84815	33.0922	1.89722
33.1887	1.77442	33.1885	1.81052	33.1878	1.85413	33.1906	1.84606	33.1899	1.89756
33.2863	1.77444	33.2861	1.81055	33.2854	1.85642	33.2882	1.84407	33.2875	1.89778
33.3839	1.77439	33.3837	1.81036	33.383	1.85865	33.3859	1.8423	33.3851	1.89823
33.4815	1.7744	33.4813	1.81021	33.4806	1.86128	33.4835	1.8405	33.4827	1.89854
33.5792	1.77443	33.5789	1.81012	33.5782	1.86338	33.5811	1.83879	33.5803	1.89888
33.6768	1.77475	33.6765	1.8102	33.6758	1.86544	33.6787	1.83713	33.6779	1.89931
33.7744	1.77517	33.7741	1.81035	33.7734	1.86798	33.7763	1.83552	33.7756	1.89954
33.872	1.77571	33.8718	1.81037	33.8711	1.8715	33.874	1.83401	33.8732	1.89982
33.9696	1.77605	33.9694	1.81029	33.9687	1.87515	33.9716	1.83274	33.9708	1.89963
34.0672	1.77651	34.067	1.81025	34.0663	1.87915	34.0692	1.83131	34.0684	1.89944
34.1648	1.77711	34.1646	1.81015	34.1639	1.88415	34.1668	1.82978	34.166	1.89929
34.2624	1.77765	34.2622	1.81018	34.2615	1.89027	34.2644	1.8284	34.2636	1.89924
34.3601	1.7782	34.3598	1.81026	34.3591	1.89623	34.3621	1.82705	34.3613	1.89902
34.4577	1.77892	34.4574	1.81024	34.4567	1.90084	34.4597	1.82582	34.4589	1.89899
34.5553	1.77965	34.555	1.81015	34.5543	1.9052	34.5573	1.82466	34.5565	1.89901
34.6529	1.78008	34.6527	1.81004	34.652	1.90875	34.6549	1.82369	34.6541	1.89919
34.7505	1.78039	34.7503	1.81011	34.7496	1.90996	34.7525	1.8229	34.7517	1.89933
34.8481	1.78046	34.8479	1.81006	34.8472	1.90827	34.8501	1.8222	34.8493	1.89949
34.9457	1.78057	34.9455	1.81013	34.9448	1.90366	34.9478	1.82143	34.947	1.89989
35.0433	1.78049	35.0431	1.81016	35.0424	1.8991	35.0454	1.82088	35.0446	1.90016
35.141	1.78035	35.1407	1.81038	35.14	1.89568	35.143	1.82045	35.1422	1.9004
35.2386	1.78002	35.2383	1.81017	35.2376	1.89278	35.2406	1.82011	35.2398	1.90083
35.3362	1.77982	35.3359	1.81003	35.3352	1.88936	35.3382	1.81971	35.3374	1.90123
35.4338	1.77946	35.4336	1.80997	35.4328	1.88503	35.4359	1.81951	35.435	1.90138
35.5314	1.77911	35.5312	1.80984	35.5305	1.8805	35.5335	1.81945	35.5327	1.90144
35.629	1.77867	35.6288	1.80963	35.6281	1.87591	35.6311	1.81963	35.6303	1.90128
35.7266	1.77817	35.7264	1.80943	35.7257	1.87191	35.7287	1.81968	35.7279	1.90129
35.8242	1.77778	35.824	1.80929	35.8233	1.86878	35.8263	1.81981	35.8255	1.90118
35.9219	1.77733	35.9216	1.80917	35.9209	1.86809	35.924	1.81975	35.9231	1.90135
36.0195	1.77676	36.0192	1.80916	36.0185	1.86887	36.0216	1.81986	36.0207	1.90164
36.1171	1.77622	36.1169	1.80902	36.1161	1.86959	36.1192	1.82012	36.1184	1.90179
36.2147	1.77595	36.2145	1.80898	36.2137	1.87008	36.2168	1.82038	36.216	1.90186
36.3123	1.77568	36.3121	1.80898	36.3114	1.87145	36.3144	1.82054	36.3136	1.90209
36.4099	1.77536	36.4097	1.80905	36.409	1.87389	36.412	1.82069	36.4112	1.90198
36.5075	1.77498	36.5073	1.80955	36.5066	1.87624	36.5097	1.82072	36.5088	1.90187
36.6052	1.77495	36.6049	1.81026	36.6042	1.8787	36.6073	1.82048	36.6064	1.9018
36.7028	1.77519	36.7025	1.81086	36.7018	1.88168	36.7049	1.82025	36.7041	1.90153
36.8004	1.77541	36.8001	1.81156	36.7994	1.88532	36.8025	1.81992	36.8017	1.90142
36.898	1.77566	36.8978	1.81211	36.897	1.8878	36.9001	1.81976	36.8993	1.90115
36.9956	1.77618	36.9954	1.81255	36.9946	1.88712	36.9978	1.8195	36.9969	1.90078
37.0932	1.77677	37.093	1.81293	37.0922	1.88356	37.0954	1.81892	37.0945	1.90062
37.1908	1.77725	37.1906	1.81352	37.1899	1.87769	37.193	1.81827	37.1922	1.90031
37.2884	1.77759	37.2882	1.81414	37.2875	1.87032	37.2906	1.81771	37.2898	1.89995
37.3861	1.77798	37.3858	1.81482	37.3851	1.8622	37.3882	1.817	37.3874	1.90004
37.4837	1.77852	37.4834	1.81532	37.4827	1.8541	37.4858	1.81644	37.485	1.90031
37.5813	1.77906	37.5811	1.81565	37.5803	1.8463	37.5835	1.81586	37.5826	1.90065
37.6789	1.77957	37.6787	1.81579	37.6779	1.83851	37.6811	1.81553	37.6802	1.90101
37.7765	1.78007	37.7763	1.81592	37.7755	1.82993	37.7787	1.8152	37.7778	1.90139
37.8741	1.78077	37.8739	1.81619	37.8731	1.81925	37.8763	1.81499	37.8755	1.90169
37.9717	1.78143	37.9715	1.81633	37.9708	1.80731	37.9739	1.8149	37.9731	1.90199
38.0694	1.78197	38.0691	1.81621	38.0684	1.79544	38.0716	1.81505	38.0707	1.90228
38.167	1.78236	38.1667	1.81611	38.166	1.7827	38.1692	1.81549	38.1683	1.90244
38.2646	1.78272	38.2643	1.81589	38.2636	1.7691	38.2668	1.8162	38.2659	1.90266
38.3622	1.78318	38.362	1.81537	38.3612	1.75669	38.3644	1.81706	38.3635	1.90305
38.4598	1.78346	38.4596	1.81474	38.4588	1.74646	38.462	1.81808	38.4612	1.90345
38.5574	1.78355	38.5572	1.81404	38.5564	1.73765	38.5596	1.81952	38.5588	1.90373
38.655	1.78352	38.6548	1.81359	38.654	1.73031	38.6573	1.82117	38.6564	1.90422
38.7526	1.78356	38.7524	1.81318	38.7516	1.72553	38.7549	1.82306	38.754	1.90469
38.8503	1.78354	38.85	1.81274	38.8493	1.72559	38.8525	1.82502	38.8516	1.9051
38.9479	1.78343	38.9476	1.81262	38.9469	1.72977	38.9501	1.82718	38.9492	1.90556
39.0455	1.78324	39.0452	1.81293	39.0445	1.7355	39.0477	1.82971	39.0469	1.90594
39.1431	1.78319	39.1429	1.81295	39.1421	1.74341	39.1454	1.83241	39.1445	1.90656
39.2407	1.78334	39.2405	1.81296	39.2397	1.7534	39.243	1.83517	39.2421	1.90699
39.3383	1.78339	39.3381	1.8131	39.3373	1.76398	39.3406	1.83817	39.3397	1.90718
39.4359	1.7833	39.4357	1.81337	39.4349	1.77434	39.4382	1.8411	39.4373	1.90724
39.5336	1.78323	39.5333	1.81367	39.5325	1.78507	39.5358	1.84382	39.5349	1.90723
39.6312	1.7832	39.6309	1.81401	39.6302	1.7956	39.6334	1.84636	39.6326	1.90709
39.7288	1.78309	39.7285	1.81403	39.7278	1.80495	39.7311	1.84884	39.7302	1.90687
39.8264	1.78299	39.8261	1.81395	39.8254	1.8122	39.8287	1.85135	39.8278	1.90666
39.924	1.78293	39.9238	1.81378	39.923	1.81766	39.9263	1.85369	39.9254	1.90642
40.0216	1.78304	40.0214	1.81387	40.0206	1.82272	40.0239	1.85583	40.023	1.90628
40.1192	1.78318	40.119	1.81398	40.1182	1.82892	40.1215	1.85766	40.1206	1.90623
40.2168	1.78332	40.2166	1.81421	40.2158	1.8358	40.2192	1.85936	40.2183	1.90614
40.3145	1.78349	40.3142	1.81466	40.3134	1.84264	40.3168	1.8609	40.3159	1.90592
40.4121	1.78371	40.4118	1.81497	40.411	1.84872	40.4144	1.86234	40.4135	1.90564
40.5097	1.78397	40.5094	1.81539	40.5087	1.85407	40.512	1.86361	40.5111	1.90558
40.6073	1.78416	40.607	1.81569	40.6063	1.85878	40.6096	1.86469	40.6087	1.90566
40.7049	1.78444	40.7047	1.81617	40.7039	1.86276	40.7073	1.8657	40.7064	1.90566
40.8025	1.78452	40.8023	1.81679	40.8015	1.86539	40.8049	1.86643	40.804	1.9058
40.9001	1.78454	40.8999	1.81738	40.8991	1.86651	40.9025	1.86701	40.9016	1.90585
40.9977	1.78446	40.9975	1.81747	40.9967	1.86685	41.0001	1.86733	40.9992	1.90572
41.0954	1.78438	41.0951	1.81782	41.0943	1.86552	41.0977	1.86742	41.0968	1.90553
41.193	1.78414	41.1927	1.81802	41.1919	1.86323	41.1953	1.86736	41.1944	1.90545
41.2906	1.78397	41.2903	1.81785	41.2896	1.8613	41.293	1.86706	41.2921	1.90554
41.3882	1.78401	41.388	1.81778	41.3872	1.86014	41.3906	1.86673	41.3897	1.90577
41.4858	1.78392	41.4856	1.81749	41.4848	1.85952	41.4882	1.86661	41.4873	1.90601
41.5834	1.78382	41.5832	1.81714	41.5824	1.85942	41.5858	1.86655	41.5849	1.90623
41.681	1.78359	41.6808	1.81682	41.68	1.86029	41.6834	1.86663	41.6825	1.90663
41.7786	1.78336	41.7784	1.81643	41.7776	1.86254	41.781	1.86667	41.7801	1.90695
41.8763	1.78325	41.876	1.81587	41.8752	1.86591	41.8787	1.86668	41.8777	1.90728
41.9739	1.78303	41.9736	1.81552	41.9728	1.86868	41.9763	1.86659	41.9754	1.90767
42.0715	1.78275	42.0713	1.81513	42.0704	1.8698	42.0739	1.86655	42.073	1.90793
42.1691	1.78258	42.1689	1.81476	42.1681	1.87001	42.1715	1.86648	42.1706	1.90826
42.2667	1.78231	42.2665	1.81451	42.2657	1.86817	42.2691	1.86627	42.2682	1.90864
42.3643	1.7822	42.3641	1.81423	42.3633	1.86471	42.3668	1.86592	42.3658	1.90887
42.4619	1.78211	42.4617	1.814	42.4609	1.86005	42.4644	1.86532	42.4634	1.90874
42.5595	1.78214	42.5593	1.81393	42.5585	1.85483	42.562	1.86465	42.5611	1.90839
42.6572	1.78233	42.6569	1.81381	42.6561	1.8479	42.6596	1.86371	42.6587	1.90803
42.7548	1.78266	42.7545	1.81362	42.7537	1.83939	42.7572	1.86283	42.7563	1.90757
42.8524	1.78304	42.8522	1.81359	42.8513	1.83058	42.8549	1.86201	42.8539	1.90744
42.95	1.78362	42.9498	1.81359	42.949	1.8227	42.9525	1.86128	42.9515	1.90745
43.0476	1.78424	43.0474	1.81336	43.0466	1.81628	43.0501	1.86057	43.0491	1.90754
43.1452	1.78494	43.145	1.8131	43.1442	1.81123	43.1477	1.85984	43.1468	1.90754
43.2428	1.78567	43.2426	1.81315	43.2418	1.80771	43.2453	1.85923	43.2444	1.90741
43.3405	1.78611	43.3402	1.81308	43.3394	1.80556	43.3429	1.85863	43.342	1.9072
43.4381	1.78666	43.4378	1.81328	43.437	1.80397	43.4406	1.85821	43.4396	1.90712
43.5357	1.78704	43.5354	1.81371	43.5346	1.80233	43.5382	1.85771	43.5372	1.90721
43.6333	1.78727	43.6331	1.81457	43.6322	1.80145	43.6358	1.85709	43.6348	1.90729
43.7309	1.78736	43.7307	1.81553	43.7298	1.80269	43.7334	1.85646	43.7325	1.90752
43.8285	1.78726	43.8283	1.81675	43.8275	1.80624	43.831	1.85581	43.8301	1.90746
43.9261	1.7871	43.9259	1.81782	43.9251	1.8108	43.9286	1.85519	43.9277	1.90716
44.0237	1.78695	44.0235	1.81911	44.0227	1.81642	44.0263	1.85465	44.0253	1.90681
44.1214	1.78657	44.1211	1.82035	44.1203	1.82113	44.1239	1.85409	44.1229	1.90619
44.219	1.78611	44.2187	1.82149	44.2179	1.82502	44.2215	1.85376	44.2206	1.9054
44.3166	1.78552	44.3163	1.82268	44.3155	1.82858	44.3191	1.85355	44.3182	1.90488
44.4142	1.7849	44.414	1.82377	44.4131	1.83201	44.4167	1.8534	44.4158	1.90436
44.5118	1.7843	44.5116	1.82462	44.5107	1.8352	44.5143	1.85348	44.5134	1.90364
44.6094	1.78363	44.6092	1.82536	44.6083	1.83967	44.612	1.8538	44.611	1.9027
44.707	1.78309	44.7068	1.8262	44.706	1.84547	44.7096	1.8542	44.7086	1.90166
44.8046	1.78268	44.8044	1.82669	44.8036	1.85191	44.8072	1.85475	44.8062	1.90019
44.9023	1.78217	44.902	1.82749	44.9012	1.85889	44.9048	1.8554	44.9039	1.8986
44.9999	1.78153	44.9996	1.82828	44.9988	1.8658	45.0024	1.85619	45.0015	1.89677
45.0975	1.78086	45.0972	1.82927	45.0964	1.87241	45.1001	1.85704	45.0991	1.89524
45.1951	1.7802	45.1949	1.83001	45.194	1.87763	45.1977	1.85793	45.1967	1.89369
45.2927	1.77961	45.2925	1.83086	45.2916	1.88023	45.2953	1.85876	45.2943	1.89185
45.3903	1.77899	45.3901	1.83158	45.3892	1.88093	45.3929	1.85934	45.3919	1.88992
45.4879	1.77851	45.4877	1.83212	45.4868	1.88075	45.4905	1.85998	45.4896	1.88811
45.5855	1.77825	45.5853	1.83228	45.5845	1.87916	45.5882	1.86063	45.5872	1.88639
45.6832	1.77821	45.6829	1.83252	45.6821	1.87465	45.6858	1.86121	45.6848	1.8846
45.7808	1.7782	45.7805	1.83285	45.7797	1.8664	45.7834	1.86177	45.7824	1.88326
45.8784	1.77836	45.8782	1.83303	45.8773	1.85603	45.881	1.86233	45.88	1.8821
45.976	1.77863	45.9758	1.83308	45.9749	1.84432	45.9786	1.86284	45.9776	1.88117
46.0736	1.77905	46.0734	1.83308	46.0725	1.83265	46.0762	1.86346	46.0753	1.88038
46.1712	1.77961	46.171	1.83307	46.1701	1.82216	46.1739	1.864	46.1729	1.87977
46.2688	1.78034	46.2686	1.83294	46.2677	1.81253	46.2715	1.86468	46.2705	1.8793
46.3664	1.78115	46.3662	1.83261	46.3654	1.80358	46.3691	1.86551	46.3681	1.87899
46.4641	1.78187	46.4638	1.83238	46.463	1.79483	46.4667	1.86625	46.4657	1.87882
46.5617	1.78245	46.5614	1.83215	46.5606	1.78526	46.5643	1.86692	46.5633	1.87894
46.6593	1.78278	46.6591	1.83154	46.6582	1.77509	46.6619	1.86769	46.661	1.87918
46.7569	1.78293	46.7567	1.83085	46.7558	1.76576	46.7596	1.86833	46.7586	1.87956
46.8545	1.78316	46.8543	1.8298	46.8534	1.75781	46.8572	1.86895	46.8562	1.88018
46.9521	1.78353	46.9519	1.82864	46.951	1.75157	46.9548	1.86953	46.9538	1.88089
47.0497	1.78391	47.0495	1.82758	47.0486	1.74648	47.0524	1.87026	47.0514	1.88144
47.1474	1.78423	47.1471	1.82666	47.1463	1.74291	47.15	1.8709	47.149	1.88224
47.245	1.78459	47.2447	1.82576	47.2439	1.74331	47.2477	1.87155	47.2467	1.88317
47.3426	1.78504	47.3424	1.82494	47.3415	1.74839	47.3453	1.87224	47.3443	1.88419
47.4402	1.78565	47.44	1.82402	47.4391	1.75776	47.4429	1.87294	47.4419	1.88508
47.5378	1.78621	47.5376	1.82319	47.5367	1.77151	47.5405	1.87362	47.5395	1.88572
47.6354	1.78656	47.6352	1.82234	47.6343	1.78935	47.6381	1.87432	47.6371	1.88635
47.733	1.78704	47.7328	1.82103	47.7319	1.81114	47.7358	1.87514	47.7347	1.88682
47.8306	1.78726	47.8304	1.81978	47.8295	1.83582	47.8334	1.87596	47.8324	1.88724
47.9283	1.78738	47.928	1.81848	47.9271	1.86202	47.931	1.8768	47.93	1.88767
48.0259	1.78738	48.0256	1.81686	48.0248	1.88899	48.0286	1.87745	48.0276	1.88816
48.1235	1.78717	48.1233	1.81518	48.1224	1.91509	48.1262	1.87814	48.1252	1.88869
48.2211	1.7868	48.2209	1.81349	48.22	1.93967	48.2238	1.8787	48.2228	1.88909
48.3187	1.78627	48.3185	1.81197	48.3176	1.96306	48.3215	1.87913	48.3204	1.88945
48.4163	1.78565	48.4161	1.81046	48.4152	1.98497	48.4191	1.87949	48.4181	1.89002
48.5139	1.78504	48.5137	1.80884	48.5128	2.00631	48.5167	1.87997	48.5157	1.8906
48.6115	1.78462	48.6113	1.80747	48.6104	2.02605	48.6143	1.88035	48.6133	1.89124
48.7092	1.78415	48.7089	1.80654	48.708	2.04242	48.7119	1.88079	48.7109	1.89203
48.8068	1.78365	48.8065	1.80582	48.8057	2.05564	48.8095	1.88104	48.8085	1.89269
48.9044	1.78306	48.9042	1.80525	48.9033	2.0674	48.9072	1.88124	48.9061	1.89326
49.002	1.7824	49.0018	1.80469	49.0009	2.07828	49.0048	1.88119	49.0038	1.89386
49.0996	1.78193	49.0994	1.8041	49.0985	2.08862	49.1024	1.88112	49.1014	1.8942
49.1972	1.78154	49.197	1.80341	49.1961	2.09747	49.2	1.88109	49.199	1.89469
49.2948	1.78107	49.2946	1.80279	49.2937	2.10366	49.2976	1.88108	49.2966	1.89522
49.3924	1.7804	49.3922	1.80241	49.3913	2.10786	49.3953	1.88114	49.3942	1.89567
49.4901	1.77989	49.4898	1.8022	49.4889	2.10961	49.4929	1.88116	49.4918	1.89629
49.5877	1.77964	49.5874	1.80189	49.5865	2.10964	49.5905	1.88121	49.5895	1.89689
49.6853	1.77932	49.6851	1.80177	49.6842	2.10771	49.6881	1.88108	49.6871	1.8974
49.7829	1.77917	49.7827	1.80164	49.7818	2.10322	49.7857	1.88095	49.7847	1.89789
49.8805	1.77913	49.8803	1.80155	49.8794	2.09632	49.8833	1.88065	49.8823	1.89816
49.9781	1.77909	49.9779	1.80184	49.977	2.08882	49.981	1.88055	49.9799	1.89839
50.0757	1.77922	50.0755	1.80237	50.0746	2.08265	50.0786	1.88037	50.0775	1.89848
50.1733	1.77939	50.1731	1.80294	50.1722	2.07815	50.1762	1.88014	50.1752	1.8985
50.271	1.7797	50.2707	1.80353	50.2698	2.07436	50.2738	1.87976	50.2728	1.89841
50.3686	1.78013	50.3684	1.80399	50.3674	2.07071	50.3714	1.87929	50.3704	1.89821
50.4662	1.78053	50.466	1.80448	50.4651	2.06576	50.469	1.87867	50.468	1.89794
50.5638	1.78088	50.5636	1.80514	50.5627	2.0606	50.5667	1.87797	50.5656	1.89746
50.6614	1.78131	50.6612	1.80568	50.6603	2.05664	50.6643	1.87723	50.6632	1.89689
50.759	1.78186	50.7588	1.8062	50.7579	2.05402	50.7619	1.87667	50.7608	1.89634
50.8566	1.78249	50.8564	1.80671	50.8555	2.05106	50.8595	1.87619	50.8585	1.89613
50.9543	1.78337	50.954	1.80712	50.9531	2.04669	50.9571	1.87586	50.9561	1.89589
51.0519	1.78416	51.0516	1.80744	51.0507	2.04027	51.0548	1.87547	51.0537	1.89554
51.1495	1.78513	51.1493	1.808	51.1483	2.03042	51.1524	1.87507	51.1513	1.89523
51.2471	1.78617	51.2469	1.80854	51.246	2.01768	51.25	1.87476	51.2489	1.8949
51.3447	1.78746	51.3445	1.80912	51.3436	2.00241	51.3476	1.87444	51.3466	1.89454
51.4423	1.78884	51.4421	1.80958	51.4412	1.98639	51.4452	1.87414	51.4442	1.89413
51.5399	1.79011	51.5397	1.80988	51.5388	1.96994	51.5429	1.87375	51.5418	1.89374
51.6375	1.79164	51.6373	1.81031	51.6364	1.95295	51.6405	1.8735	51.6394	1.89336
51.7352	1.79327	51.7349	1.81081	51.734	1.93586	51.7381	1.87315	51.737	1.89306
51.8328	1.79492	51.8325	1.81121	51.8316	1.91889	51.8357	1.87291	51.8346	1.89263
51.9304	1.79676	51.9302	1.81152	51.9292	1.90095	51.9333	1.8724	51.9323	1.89202
52.028	1.79874	52.0278	1.81165	52.0268	1.88089	52.0309	1.87195	52.0299	1.8917
52.1256	1.80072	52.1254	1.81187	52.1245	1.85988	52.1286	1.87159	52.1275	1.89128
52.2232	1.80291	52.223	1.81195	52.2221	1.83915	52.2262	1.87139	52.2251	1.89098
52.3208	1.80515	52.3206	1.81211	52.3197	1.81979	52.3238	1.8712	52.3227	1.89058
52.4184	1.80754	52.4182	1.81236	52.4173	1.8024	52.4214	1.87111	52.4203	1.89002
52.5161	1.81003	52.5158	1.81254	52.5149	1.7866	52.519	1.87122	52.518	1.88974
52.6137	1.8124	52.6134	1.81265	52.6125	1.77317	52.6166	1.87134	52.6156	1.88946
52.7113	1.81464	52.7111	1.81279	52.7101	1.76158	52.7143	1.87129	52.7132	1.88904
52.8089	1.81689	52.8087	1.81313	52.8077	1.7513	52.8119	1.87127	52.8108	1.88845
52.9065	1.819	52.9063	1.81343	52.9054	1.74254	52.9095	1.87117	52.9084	1.88796
53.0041	1.82099	53.0039	1.81389	53.003	1.73559	53.0071	1.8712	53.006	1.88752
53.1017	1.82274	53.1015	1.81406	53.1006	1.73183	53.1047	1.87121	53.1036	1.88722
53.1993	1.8243	53.1991	1.81422	53.1982	1.73157	53.2023	1.87102	53.2013	1.88689
53.297	1.82558	53.2967	1.814	53.2958	1.73501	53.3	1.87091	53.2989	1.88656
53.3946	1.82652	53.3944	1.81379	53.3934	1.74042	53.3976	1.87077	53.3965	1.88646
53.4922	1.82739	53.492	1.81372	53.491	1.74637	53.4952	1.87071	53.4941	1.88652
53.5898	1.82815	53.5896	1.81358	53.5886	1.753	53.5928	1.87052	53.5917	1.88666
53.6874	1.82866	53.6872	1.81319	53.6863	1.76085	53.6904	1.87031	53.6893	1.88673
53.785	1.82904	53.7848	1.81263	53.7839	1.77063	53.7881	1.87001	53.787	1.8871
53.8826	1.82927	53.8824	1.81198	53.8815	1.78174	53.8857	1.86984	53.8846	1.88769
53.9802	1.82915	53.98	1.81142	53.9791	1.79382	53.9833	1.86974	53.9822	1.88809
54.0779	1.82894	54.0777	1.81071	54.0767	1.80578	54.0809	1.86955	54.0798	1.8885
54.1755	1.82833	54.1753	1.81016	54.1743	1.81726	54.1785	1.8694	54.1774	1.88872
54.2731	1.82749	54.2729	1.80982	54.2719	1.82799	54.2761	1.8692	54.275	1.88911
54.3707	1.82654	54.3705	1.80943	54.3695	1.83762	54.3738	1.86907	54.3727	1.88943
54.4683	1.82534	54.4681	1.80903	54.4671	1.84634	54.4714	1.8688	54.4703	1.88932
54.5659	1.82402	54.5657	1.80859	54.5648	1.85267	54.569	1.86851	54.5679	1.88916
54.6635	1.82268	54.6633	1.8083	54.6624	1.8573	54.6666	1.86839	54.6655	1.88929
54.7611	1.82116	54.7609	1.80819	54.76	1.86152	54.7642	1.86826	54.7631	1.88929
54.8588	1.81944	54.8586	1.80823	54.8576	1.86561	54.8618	1.8681	54.8608	1.88916
54.9564	1.81776	54.9562	1.80806	54.9552	1.86978	54.9595	1.86774	54.9584	1.88913
55.054	1.81597	55.0538	1.80797	55.0528	1.87428	55.0571	1.8673	55.056	1.88892
55.1516	1.81434	55.1514	1.80797	55.1504	1.87966	55.1547	1.86684	55.1536	1.88889
55.2492	1.81275	55.249	1.80811	55.248	1.88385	55.2523	1.86618	55.2512	1.88893
55.3468	1.81123	55.3466	1.80813	55.3457	1.88712	55.3499	1.86539	55.3488	1.889
55.4444	1.80966	55.4442	1.80821	55.4433	1.89054	55.4476	1.8645	55.4464	1.88901
55.542	1.80808	55.5418	1.80826	55.5409	1.89384	55.5452	1.86359	55.5441	1.88896
55.6397	1.8065	55.6395	1.80842	55.6385	1.89564	55.6428	1.86275	55.6417	1.88884
55.7373	1.80494	55.7371	1.80844	55.7361	1.89524	55.7404	1.86193	55.7393	1.88869
55.8349	1.80335	55.8347	1.80839	55.8337	1.8946	55.838	1.86111	55.8369	1.8884
55.9325	1.80193	55.9323	1.8081	55.9313	1.89571	55.9356	1.86015	55.9345	1.88797
56.0301	1.80065	56.0299	1.80789	56.0289	1.89768	56.0333	1.85936	56.0321	1.88759
56.1277	1.79953	56.1275	1.80752	56.1266	1.89895	56.1309	1.85857	56.1298	1.88723
56.2253	1.79849	56.2251	1.8071	56.2242	1.89972	56.2285	1.85793	56.2274	1.88681
56.3229	1.79732	56.3227	1.80704	56.3218	1.90049	56.3261	1.85723	56.325	1.88644
56.4206	1.79616	56.4204	1.80681	56.4194	1.90082	56.4237	1.8565	56.4226	1.88641
56.5182	1.79501	56.518	1.80661	56.517	1.90241	56.5214	1.85578	56.5202	1.88629
56.6158	1.79391	56.6156	1.80633	56.6146	1.90593	56.619	1.85498	56.6178	1.88595
56.7134	1.79275	56.7132	1.80598	56.7122	1.91028	56.7166	1.85406	56.7155	1.88557
56.811	1.79167	56.8108	1.80582	56.8098	1.91435	56.8142	1.85323	56.8131	1.88548
56.9086	1.79056	56.9084	1.80606	56.9075	1.9172	56.9118	1.85264	56.9107	1.88561
57.0062	1.78953	57.006	1.80637	57.0051	1.9193	57.0094	1.85201	57.0083	1.88569
57.1038	1.7883	57.1036	1.80661	57.1027	1.92012	57.1071	1.8515	57.1059	1.88556
57.2015	1.78704	57.2013	1.80703	57.2003	1.92025	57.2047	1.85096	57.2035	1.88529
57.2991	1.78589	57.2989	1.8073	57.2979	1.92011	57.3023	1.85049	57.3012	1.88469
57.3967	1.78496	57.3965	1.80754	57.3955	1.92019	57.3999	1.85004	57.3988	1.88397
57.4943	1.78398	57.4941	1.808	57.4931	1.9198	57.4975	1.84979	57.4964	1.88324
57.5919	1.78306	57.5917	1.80859	57.5907	1.91898	57.5951	1.84963	57.594	1.88271
57.6895	1.78217	57.6893	1.80958	57.6883	1.91785	57.6928	1.84943	57.6916	1.88219
57.7871	1.78125	57.7869	1.81063	57.786	1.9156	57.7904	1.84934	57.7892	1.88158
57.8848	1.78043	57.8845	1.81182	57.8836	1.91086	57.888	1.84927	57.8868	1.88095
57.9824	1.77943	57.9822	1.81317	57.9812	1.90493	57.9856	1.84904	57.9845	1.88038
58.08	1.77843	58.0798	1.81488	58.0788	1.89993	58.0832	1.84878	58.0821	1.87995
58.1776	1.77757	58.1774	1.81626	58.1764	1.89677	58.1808	1.84861	58.1797	1.87945
58.2752	1.77689	58.275	1.81726	58.274	1.89551	58.2785	1.84833	58.2773	1.87923
58.3728	1.77629	58.3726	1.8186	58.3716	1.89514	58.3761	1.84821	58.3749	1.87899
58.4704	1.77571	58.4702	1.81989	58.4692	1.89425	58.4737	1.84804	58.4726	1.87884
58.568	1.77507	58.5678	1.82129	58.5669	1.89243	58.5713	1.84788	58.5702	1.87877
58.6657	1.77459	58.6655	1.82237	58.6645	1.89107	58.6689	1.84782	58.6678	1.87861
58.7633	1.77415	58.7631	1.82294	58.7621	1.89142	58.7666	1.84769	58.7654	1.87828
58.8609	1.77357	58.8607	1.82334	58.8597	1.8933	58.8642	1.84744	58.863	1.8777
58.9585	1.77304	58.9583	1.82345	58.9573	1.89521	58.9618	1.84739	58.9606	1.87707
59.0561	1.77274	59.0559	1.82346	59.0549	1.89571	59.0594	1.8473	59.0583	1.87643
59.1537	1.77238	59.1535	1.82348	59.1525	1.89444	59.157	1.84719	59.1559	1.87588
59.2513	1.77192	59.2511	1.82376	59.2501	1.89095	59.2546	1.84729	59.2535	1.87531
59.3489	1.7712	59.3488	1.82407	59.3478	1.88519	59.3523	1.84752	59.3511	1.87466
59.4465	1.77049	59.4464	1.82427	59.4454	1.87954	59.4499	1.84757	59.4487	1.87407
59.5442	1.76999	59.544	1.82413	59.543	1.87606	59.5475	1.8475	59.5463	1.87324
59.6418	1.76934	59.6416	1.82399	59.6406	1.87471	59.6451	1.84763	59.644	1.87249
59.7394	1.76878	59.7392	1.8239	59.7382	1.87378	59.7427	1.84746	59.7416	1.87202
59.837	1.76836	59.8368	1.82387	59.8358	1.87348	59.8403	1.84722	59.8392	1.87162
59.9346	1.76816	59.9344	1.82397	59.9334	1.87395	59.938	1.84695	59.9368	1.87117
60.0322	1.76806	60.032	1.82391	60.031	1.87515	60.0356	1.84664	60.0344	1.87078
60.1298	1.76804	60.1297	1.82397	60.1287	1.87702	60.1332	1.84631	60.132	1.87039
60.2274	1.76804	60.2273	1.8242	60.2263	1.88032	60.2308	1.84591	60.2296	1.87011
60.3251	1.76834	60.3249	1.82416	60.3239	1.88621	60.3284	1.84524	60.3273	1.86978
60.4227	1.76895	60.4225	1.82415	60.4215	1.89273	60.426	1.84462	60.4249	1.8696
60.5203	1.76964	60.5201	1.82414	60.5191	1.89697	60.5237	1.84406	60.5225	1.8695
60.6179	1.77086	60.6177	1.82438	60.6167	1.89808	60.6213	1.84339	60.6201	1.8696
60.7155	1.77234	60.7153	1.82475	60.7143	1.89784	60.7189	1.84289	60.7177	1.86981
60.8131	1.77415	60.8129	1.82493	60.8119	1.89711	60.8165	1.84242	60.8153	1.87012
60.9107	1.77613	60.9106	1.82525	60.9096	1.89581	60.9141	1.84181	60.913	1.87069
61.0083	1.77812	61.0082	1.82531	61.0072	1.89441	61.0118	1.84113	61.0106	1.87113
61.106	1.78032	61.1058	1.82519	61.1048	1.89289	61.1094	1.84033	61.1082	1.87184
61.2036	1.78282	61.2034	1.82522	61.2024	1.89072	61.207	1.83945	61.2058	1.87265
61.3012	1.7855	61.301	1.82493	61.3	1.88796	61.3046	1.83859	61.3034	1.87372
61.3988	1.78825	61.3986	1.82449	61.3976	1.88426	61.4022	1.83791	61.401	1.87471
61.4964	1.79081	61.4962	1.82434	61.4952	1.87977	61.4998	1.83708	61.4987	1.87605
61.594	1.7933	61.5938	1.82382	61.5928	1.87454	61.5975	1.83628	61.5963	1.87732
61.6916	1.79568	61.6915	1.82342	61.6904	1.86885	61.6951	1.83577	61.6939	1.87841
61.7893	1.79785	61.7891	1.82299	61.7881	1.86352	61.7927	1.83543	61.7915	1.87981
61.8869	1.79983	61.8867	1.82233	61.8857	1.85991	61.8903	1.83535	61.8891	1.88131
61.9845	1.80166	61.9843	1.82163	61.9833	1.85807	61.9879	1.83552	61.9867	1.88304
62.0821	1.80336	62.0819	1.82094	62.0809	1.85636	62.0855	1.83578	62.0844	1.88483
62.1797	1.80493	62.1795	1.81994	62.1785	1.85223	62.1832	1.83621	62.182	1.88638
62.2773	1.80626	62.2771	1.81918	62.2761	1.84429	62.2808	1.83688	62.2796	1.88792
62.3749	1.80744	62.3747	1.8185	62.3737	1.83513	62.3784	1.8375	62.3772	1.88928
62.4725	1.80871	62.4724	1.81757	62.4713	1.82719	62.476	1.83831	62.4748	1.89061
62.5702	1.80957	62.57	1.81651	62.569	1.82123	62.5736	1.83905	62.5724	1.89193
62.6678	1.81037	62.6676	1.81554	62.6666	1.81548	62.6712	1.8397	62.6701	1.89314
62.7654	1.81106	62.7652	1.81473	62.7642	1.80888	62.7689	1.84018	62.7677	1.89412
62.863	1.8117	62.8628	1.81391	62.8618	1.8012	62.8665	1.84077	62.8653	1.89498
62.9606	1.81232	62.9604	1.81333	62.9594	1.79283	62.9641	1.84127	62.9629	1.89588
63.0582	1.81273	63.058	1.81298	63.057	1.78594	63.0617	1.84193	63.0605	1.89648
63.1558	1.81282	63.1557	1.81247	63.1546	1.783	63.1593	1.84247	63.1581	1.89738
63.2534	1.8129	63.2533	1.81216	63.2522	1.78425	63.257	1.84275	63.2558	1.89841
63.351	1.81286	63.3509	1.812	63.3499	1.78863	63.3546	1.84282	63.3534	1.89965
63.4487	1.81278	63.4485	1.81192	63.4475	1.79398	63.4522	1.84289	63.451	1.90067
63.5463	1.81305	63.5461	1.81243	63.5451	1.79957	63.5498	1.84288	63.5486	1.90174
63.6439	1.81334	63.6437	1.81285	63.6427	1.80638	63.6474	1.84276	63.6462	1.90288
63.7415	1.8136	63.7413	1.81337	63.7403	1.81456	63.745	1.84262	63.7438	1.9039
63.8391	1.81383	63.8389	1.81383	63.8379	1.82332	63.8427	1.84221	63.8415	1.90468
63.9367	1.81408	63.9366	1.81431	63.9355	1.8311	63.9403	1.84159	63.9391	1.90533
64.0343	1.81441	64.0342	1.81485	64.0331	1.83672	64.0379	1.84081	64.0367	1.90603
64.1319	1.81485	64.1318	1.81552	64.1308	1.84077	64.1355	1.84004	64.1343	1.90667
64.2296	1.81522	64.2294	1.81603	64.2284	1.84389	64.2331	1.83924	64.2319	1.90719
64.3272	1.81554	64.327	1.81641	64.326	1.84704	64.3307	1.83847	64.3295	1.90769
64.4248	1.81571	64.4246	1.8167	64.4236	1.85235	64.4284	1.83755	64.4271	1.90806
64.5224	1.81568	64.5222	1.81674	64.5212	1.85982	64.526	1.83668	64.5248	1.9082
64.62	1.81536	64.6198	1.81655	64.6188	1.86843	64.6236	1.83575	64.6224	1.90851
64.7176	1.81506	64.7175	1.81626	64.7164	1.87718	64.7212	1.83492	64.72	1.909
64.8152	1.81484	64.8151	1.81612	64.814	1.88559	64.8188	1.83406	64.8176	1.90956
64.9129	1.8146	64.9127	1.81614	64.9117	1.89469	64.9164	1.83338	64.9152	1.91028
65.0105	1.81451	65.0103	1.81603	65.0093	1.90491	65.0141	1.83272	65.0128	1.91096
65.1081	1.81451	65.1079	1.81614	65.1069	1.91541	65.1117	1.83182	65.1105	1.91145
65.2057	1.81439	65.2055	1.8162	65.2045	1.92548	65.2093	1.83103	65.2081	1.91174
65.3033	1.81433	65.3031	1.81613	65.3021	1.93359	65.3069	1.83024	65.3057	1.91189
65.4009	1.81441	65.4008	1.81613	65.3997	1.93933	65.4045	1.8295	65.4033	1.91226
65.4985	1.81439	65.4984	1.81587	65.4973	1.94398	65.5022	1.82871	65.5009	1.91256
65.5961	1.81437	65.596	1.81575	65.5949	1.94857	65.5998	1.8279	65.5986	1.91268
65.6938	1.81438	65.6936	1.81543	65.6925	1.95305	65.6974	1.82692	65.6962	1.91253
65.7914	1.81436	65.7912	1.81493	65.7901	1.95604	65.795	1.82575	65.7938	1.91251
65.889	1.81448	65.8888	1.81417	65.8878	1.95719	65.8926	1.82448	65.8914	1.91228
65.9866	1.81452	65.9864	1.81334	65.9854	1.95795	65.9902	1.8231	65.989	1.91196
66.0842	1.81464	66.084	1.81251	66.083	1.9596	66.0879	1.82174	66.0866	1.91163
66.1818	1.81487	66.1817	1.8117	66.1806	1.96368	66.1855	1.82038	66.1842	1.9113
66.2794	1.81524	66.2793	1.81099	66.2782	1.96956	66.2831	1.81913	66.2819	1.91109
66.377	1.81565	66.3769	1.81043	66.3758	1.97475	66.3807	1.81772	66.3795	1.91078
66.4746	1.81611	66.4745	1.81024	66.4734	1.97755	66.4783	1.81627	66.4771	1.91065
66.5723	1.81682	66.5721	1.8101	66.571	1.97774	66.5759	1.81482	66.5747	1.91045
66.6699	1.81756	66.6697	1.80985	66.6687	1.97681	66.6736	1.81337	66.6723	1.91033
66.7675	1.81808	66.7673	1.80966	66.7663	1.97716	66.7712	1.81206	66.7699	1.91017
66.8651	1.81861	66.865	1.80946	66.8639	1.97946	66.8688	1.8108	66.8676	1.90997
66.9627	1.81906	66.9626	1.8092	66.9615	1.98172	66.9664	1.80963	66.9652	1.90994
67.0603	1.81941	67.0602	1.8084	67.0591	1.98225	67.064	1.80874	67.0628	1.90982
67.1579	1.81973	67.1578	1.80779	67.1567	1.98028	67.1616	1.8078	67.1604	1.90976
67.2555	1.82009	67.2554	1.80733	67.2543	1.977	67.2593	1.80686	67.258	1.9097
67.3532	1.82026	67.353	1.80639	67.3519	1.97366	67.3569	1.80608	67.3556	1.90947
67.4508	1.82052	67.4506	1.80517	67.4496	1.96979	67.4545	1.80537	67.4533	1.90938
67.5484	1.82088	67.5482	1.80386	67.5472	1.96485	67.5521	1.80464	67.5509	1.90954
67.646	1.82129	67.6459	1.80271	67.6448	1.95838	67.6497	1.80397	67.6485	1.91001
67.7436	1.82201	67.7435	1.80171	67.7424	1.95124	67.7474	1.80357	67.7461	1.91054
67.8412	1.82254	67.8411	1.80085	67.84	1.94512	67.845	1.80328	67.8437	1.91138
67.9388	1.82312	67.9387	1.8	67.9376	1.93991	67.9426	1.80322	67.9413	1.91214
68.0364	1.82357	68.0363	1.79923	68.0352	1.93503	68.0402	1.80325	68.039	1.91322
68.1341	1.82416	68.1339	1.79823	68.1328	1.92942	68.1378	1.8034	68.1366	1.91467
68.2317	1.82476	68.2315	1.79709	68.2305	1.92271	68.2354	1.80359	68.2342	1.91634
68.3293	1.82549	68.3291	1.79599	68.3281	1.91516	68.3331	1.80407	68.3318	1.91828
68.4269	1.8264	68.4268	1.79475	68.4257	1.90825	68.4307	1.80478	68.4294	1.92006
68.5245	1.82715	68.5244	1.79363	68.5233	1.90406	68.5283	1.80592	68.527	1.92174
68.6221	1.82792	68.622	1.79273	68.6209	1.90269	68.6259	1.80742	68.6246	1.92339
68.7197	1.82868	68.7196	1.79176	68.7185	1.90182	68.7235	1.80879	68.7223	1.92492
68.8174	1.82953	68.8172	1.79069	68.8161	1.89826	68.8211	1.81003	68.8199	1.92623
68.915	1.83048	68.9148	1.78971	68.9137	1.89322	68.9188	1.81116	68.9175	1.92759
69.0126	1.8317	69.0124	1.78915	69.0114	1.88838	69.0164	1.8122	69.0151	1.92908
69.1102	1.83305	69.11	1.78856	69.109	1.88514	69.114	1.81346	69.1127	1.93036
69.2078	1.83431	69.2077	1.78798	69.2066	1.88308	69.2116	1.81487	69.2104	1.93145
69.3054	1.83571	69.3053	1.78785	69.3042	1.88142	69.3092	1.8161	69.308	1.93258
69.403	1.83692	69.4029	1.78791	69.4018	1.87999	69.4068	1.81721	69.4056	1.93383
69.5006	1.83796	69.5005	1.78805	69.4994	1.87776	69.5045	1.81822	69.5032	1.93504
69.5982	1.83902	69.5981	1.78819	69.597	1.87541	69.6021	1.81898	69.6008	1.93591
69.6959	1.83994	69.6957	1.78838	69.6946	1.87461	69.6997	1.81987	69.6984	1.93691
69.7935	1.84103	69.7933	1.78866	69.7923	1.87451	69.7973	1.82087	69.796	1.93781
69.8911	1.84201	69.8909	1.78907	69.8899	1.87487	69.8949	1.82168	69.8937	1.93881
69.9887	1.84291	69.9886	1.78951	69.9875	1.87556	69.9926	1.82231	69.9913	1.93928
70.0863	1.8436	70.0862	1.79016	70.0851	1.87557	70.0902	1.82269	70.0889	1.93953
70.1839	1.84414	70.1838	1.79086	70.1827	1.87491	70.1878	1.82283	70.1865	1.93957
70.2815	1.84452	70.2814	1.7914	70.2803	1.87418	70.2854	1.82279	70.2841	1.93949
70.3791	1.84489	70.379	1.79211	70.3779	1.87348	70.383	1.8226	70.3817	1.93937
70.4768	1.84547	70.4766	1.79293	70.4755	1.8717	70.4806	1.82197	70.4794	1.93913
70.5744	1.84578	70.5742	1.79357	70.5732	1.86763	70.5783	1.82099	70.577	1.93883
70.672	1.84611	70.6718	1.79423	70.6708	1.86165	70.6759	1.81989	70.6746	1.93848
70.7696	1.84618	70.7695	1.79506	70.7684	1.85646	70.7735	1.81861	70.7722	1.93826
70.8672	1.84614	70.8671	1.79581	70.866	1.85216	70.8711	1.81747	70.8698	1.9378
70.9648	1.84597	70.9647	1.79644	70.9636	1.84793	70.9687	1.81642	70.9674	1.93717
71.0624	1.8457	71.0623	1.79713	71.0612	1.84308	71.0663	1.81519	71.0651	1.93664
71.16	1.84531	71.1599	1.79798	71.1588	1.83822	71.164	1.81405	71.1627	1.93627
71.2577	1.84476	71.2575	1.79871	71.2564	1.83485	71.2616	1.81295	71.2603	1.93563
71.3553	1.84411	71.3552	1.79961	71.3541	1.83364	71.3592	1.81201	71.3579	1.93477
71.4529	1.84342	71.4528	1.80025	71.4517	1.83599	71.4568	1.81111	71.4555	1.93399
71.5505	1.84268	71.5504	1.80122	71.5493	1.8404	71.5544	1.81058	71.5531	1.93347
71.6481	1.8419	71.648	1.80215	71.6469	1.84279	71.652	1.80993	71.6508	1.93271
71.7457	1.84102	71.7456	1.80288	71.7445	1.84264	71.7497	1.80924	71.7484	1.9319
71.8433	1.84015	71.8432	1.80374	71.8421	1.84117	71.8473	1.80848	71.846	1.93112
71.9409	1.83942	71.9408	1.80465	71.9397	1.83918	71.9449	1.8076	71.9436	1.93091
72.0385	1.83863	72.0384	1.80572	72.0373	1.838	72.0425	1.80673	72.0412	1.93045
72.1362	1.83805	72.1361	1.80683	72.135	1.83763	72.1401	1.80573	72.1388	1.92987
72.2338	1.83762	72.2337	1.80803	72.2326	1.8372	72.2377	1.80463	72.2364	1.9294
72.3314	1.83715	72.3313	1.80907	72.3302	1.83507	72.3354	1.80342	72.3341	1.92908
72.429	1.83668	72.4289	1.81019	72.4278	1.83062	72.433	1.80241	72.4317	1.92894
72.5266	1.83642	72.5265	1.81112	72.5254	1.82525	72.5306	1.80133	72.5293	1.92882
72.6242	1.83616	72.6241	1.81219	72.623	1.82113	72.6282	1.80043	72.6269	1.92878
72.7218	1.83613	72.7217	1.81329	72.7206	1.81797	72.7258	1.79963	72.7245	1.92875
72.8195	1.83626	72.8193	1.8144	72.8182	1.81463	72.8235	1.79888	72.8222	1.92883
72.9171	1.8365	72.917	1.81562	72.9159	1.81124	72.9211	1.79812	72.9198	1.92893
73.0147	1.83684	73.0146	1.81675	73.0135	1.80827	73.0187	1.79744	73.0174	1.92925
73.1123	1.83718	73.1122	1.81762	73.1111	1.80557	73.1163	1.79684	73.115	1.92964
73.2099	1.83759	73.2098	1.81889	73.2087	1.80187	73.2139	1.79639	73.2126	1.9302
73.3075	1.83817	73.3074	1.8202	73.3063	1.79708	73.3115	1.79595	73.3102	1.93072
73.4051	1.83888	73.405	1.82175	73.4039	1.79134	73.4092	1.79548	73.4079	1.93091
73.5027	1.83956	73.5026	1.82304	73.5015	1.78569	73.5068	1.795	73.5055	1.93084
73.6004	1.84023	73.6002	1.82426	73.5991	1.78103	73.6044	1.79439	73.6031	1.93083
73.698	1.84088	73.6979	1.82562	73.6968	1.77746	73.702	1.79387	73.7007	1.93069
73.7956	1.84148	73.7955	1.82683	73.7944	1.77425	73.7996	1.79356	73.7983	1.93043
73.8932	1.84182	73.8931	1.82791	73.892	1.77088	73.8972	1.79338	73.8959	1.92982
73.9908	1.84224	73.9907	1.8285	73.9896	1.76656	73.9949	1.79327	73.9935	1.92921
74.0884	1.84269	74.0883	1.82912	74.0872	1.76147	74.0925	1.79331	74.0912	1.92865
74.186	1.84291	74.1859	1.8295	74.1848	1.75609	74.1901	1.7933	74.1888	1.92789
74.2836	1.84304	74.2835	1.82971	74.2824	1.75182	74.2877	1.79343	74.2864	1.92698
74.3812	1.84296	74.3811	1.82962	74.38	1.74981	74.3853	1.79357	74.384	1.92602
74.4789	1.84294	74.4788	1.8297	74.4776	1.74898	74.4829	1.79365	74.4816	1.92498
74.5765	1.84306	74.5764	1.82959	74.5753	1.74815	74.5806	1.79384	74.5792	1.92389
74.6741	1.84312	74.674	1.82906	74.6729	1.74749	74.6782	1.79407	74.6769	1.92287
74.7717	1.84303	74.7716	1.82838	74.7705	1.74809	74.7758	1.79404	74.7745	1.92181
74.8693	1.84283	74.8692	1.82754	74.8681	1.75021	74.8734	1.79406	74.8721	1.92075
74.9669	1.84252	74.9668	1.82696	74.9657	1.75315	74.971	1.79423	74.9697	1.91968
75.0645	1.84212	75.0644	1.82645	75.0633	1.75745	75.0686	1.79429	75.0673	1.91855
75.1621	1.84175	75.1621	1.82546	75.1609	1.76405	75.1663	1.79439	75.1649	1.91739
75.2598	1.84135	75.2597	1.82433	75.2585	1.77241	75.2639	1.7944	75.2626	1.91627
75.3574	1.84094	75.3573	1.82302	75.3562	1.77943	75.3615	1.79458	75.3602	1.91537
75.455	1.84052	75.4549	1.82156	75.4538	1.78432	75.4591	1.79482	75.4578	1.9146
75.5526	1.84012	75.5525	1.82019	75.5514	1.7889	75.5567	1.79507	75.5554	1.91378
75.6502	1.83963	75.6501	1.81867	75.649	1.79387	75.6543	1.79509	75.653	1.91305
75.7478	1.83924	75.7477	1.8169	75.7466	1.79897	75.752	1.79516	75.7506	1.91239
75.8454	1.83902	75.8453	1.81499	75.8442	1.80381	75.8496	1.79532	75.8482	1.91182
75.9431	1.83884	75.943	1.81327	75.9418	1.80881	75.9472	1.79538	75.9459	1.91147
76.0407	1.83859	76.0406	1.8116	76.0394	1.81368	76.0448	1.79564	76.0435	1.91106
76.1383	1.83848	76.1382	1.81001	76.1371	1.81854	76.1424	1.79598	76.1411	1.91084
76.2359	1.83839	76.2358	1.80853	76.2347	1.82336	76.24	1.79636	76.2387	1.91097
76.3335	1.83837	76.3334	1.80709	76.3323	1.82782	76.3377	1.79663	76.3363	1.9112
76.4311	1.83827	76.431	1.80578	76.4299	1.83312	76.4353	1.79705	76.434	1.91164
76.5287	1.83796	76.5286	1.80448	76.5275	1.83904	76.5329	1.79736	76.5316	1.91228
76.6263	1.83757	76.6262	1.80364	76.6251	1.84524	76.6305	1.79789	76.6292	1.91286
76.7239	1.83712	76.7239	1.80343	76.7227	1.85105	76.7281	1.79843	76.7268	1.91349
76.8216	1.83668	76.8215	1.8033	76.8203	1.85701	76.8257	1.79901	76.8244	1.91414
76.9192	1.83633	76.9191	1.80307	76.918	1.86451	76.9234	1.79948	76.922	1.91452
77.0168	1.8362	77.0167	1.80268	77.0156	1.87274	77.021	1.79969	77.0197	1.91489
77.1144	1.8361	77.1143	1.80254	77.1132	1.87946	77.1186	1.79977	77.1173	1.91547
77.212	1.83593	77.2119	1.8023	77.2108	1.88344	77.2162	1.79996	77.2149	1.91587
77.3096	1.83575	77.3095	1.80214	77.3084	1.88704	77.3138	1.80011	77.3125	1.91622
77.4072	1.83555	77.4072	1.80198	77.406	1.89126	77.4115	1.80003	77.4101	1.91657
77.5048	1.83539	77.5048	1.80171	77.5036	1.89647	77.5091	1.80012	77.5077	1.91689
77.6025	1.83545	77.6024	1.8015	77.6012	1.90283	77.6067	1.80018	77.6053	1.91712
77.7001	1.83545	77.7	1.80111	77.6989	1.91075	77.7043	1.80014	77.703	1.91725
77.7977	1.83544	77.7976	1.80095	77.7965	1.91973	77.8019	1.79985	77.8006	1.91744
77.8953	1.83528	77.8952	1.80067	77.8941	1.92758	77.8995	1.79962	77.8982	1.91759
77.9929	1.83485	77.9928	1.80032	77.9917	1.93302	77.9972	1.79935	77.9958	1.91778
78.0905	1.83427	78.0904	1.7999	78.0893	1.93717	78.0948	1.79911	78.0934	1.91758
78.1881	1.83377	78.1881	1.79964	78.1869	1.94306	78.1924	1.79883	78.191	1.91723
78.2857	1.83318	78.2857	1.79949	78.2845	1.95471	78.29	1.7986	78.2887	1.91674
78.3833	1.83247	78.3833	1.79958	78.3821	1.97141	78.3876	1.79837	78.3863	1.91596
78.481	1.83171	78.4809	1.79966	78.4798	1.99134	78.4852	1.79798	78.4839	1.91503
78.5786	1.83088	78.5785	1.79944	78.5774	2.01075	78.5829	1.79752	78.5815	1.91409
78.6762	1.83008	78.6761	1.79896	78.675	2.02745	78.6805	1.79721	78.6791	1.91327
78.7738	1.82924	78.7737	1.79872	78.7726	2.04049	78.7781	1.79684	78.7767	1.9124
78.8714	1.82837	78.8713	1.7984	78.8702	2.05054	78.8757	1.79659	78.8744	1.91162
78.969	1.82747	78.969	1.79823	78.9678	2.06007	78.9733	1.79655	78.972	1.91084
79.0666	1.82657	79.0666	1.79817	79.0654	2.07139	79.0709	1.79654	79.0696	1.90981
79.1642	1.82553	79.1642	1.79839	79.163	2.08422	79.1686	1.79639	79.1672	1.90867
79.2619	1.82451	79.2618	1.79878	79.2607	2.09449	79.2662	1.79623	79.2648	1.90742
79.3595	1.8235	79.3594	1.79914	79.3583	2.10029	79.3638	1.79624	79.3624	1.90629
79.4571	1.82244	79.457	1.79982	79.4559	2.10029	79.4614	1.79629	79.46	1.90524
79.5547	1.8212	79.5546	1.80072	79.5535	2.09642	79.559	1.79659	79.5577	1.90433
79.6523	1.82002	79.6523	1.80197	79.6511	2.09124	79.6567	1.79693	79.6553	1.90337
79.7499	1.81894	79.7499	1.80315	79.7487	2.08712	79.7543	1.79743	79.7529	1.90229
79.8475	1.8181	79.8475	1.80463	79.8463	2.08506	79.8519	1.79796	79.8505	1.90119
79.9452	1.81756	79.9451	1.80613	79.9439	2.08481	79.9495	1.79847	79.9481	1.90021
80.0428	1.81715	80.0427	1.80799	80.0416	2.08437	80.0471	1.79893	80.0458	1.89976
80.1404	1.81674	80.1403	1.80974	80.1392	2.08099	80.1447	1.79962	80.1434	1.89936
80.238	1.81643	80.2379	1.81151	80.2368	2.0715	80.2423	1.80031	80.241	1.89901
80.3356	1.81621	80.3355	1.81299	80.3344	2.05714	80.34	1.80104	80.3386	1.8987
80.4332	1.81599	80.4332	1.81466	80.432	2.0399	80.4376	1.80188	80.4362	1.89831
80.5308	1.81586	80.5308	1.8165	80.5296	2.02262	80.5352	1.80267	80.5338	1.89802
80.6284	1.81584	80.6284	1.81825	80.6272	2.00667	80.6328	1.80346	80.6314	1.89772
80.726	1.81559	80.726	1.81976	80.7248	1.99149	80.7304	1.80449	80.7291	1.89752
80.8237	1.81512	80.8236	1.82118	80.8225	1.97565	80.828	1.80521	80.8267	1.89735
80.9213	1.81452	80.9212	1.82282	80.9201	1.95809	80.9257	1.80588	80.9243	1.89725
81.0189	1.81394	81.0188	1.82417	81.0177	1.9386	81.0233	1.80654	81.0219	1.89723
81.1165	1.81359	81.1164	1.82545	81.1153	1.91796	81.1209	1.80713	81.1195	1.89734
81.2141	1.81316	81.2141	1.82653	81.2129	1.89971	81.2185	1.80763	81.2171	1.8977
81.3117	1.81277	81.3117	1.82778	81.3105	1.88516	81.3161	1.80802	81.3148	1.89808
81.4093	1.81234	81.4093	1.82868	81.4081	1.87561	81.4137	1.80844	81.4124	1.89849
81.5069	1.81187	81.5069	1.82951	81.5057	1.86918	81.5114	1.80873	81.51	1.89871
81.6046	1.8112	81.6045	1.83042	81.6034	1.86329	81.609	1.80914	81.6076	1.89886
81.7022	1.81054	81.7021	1.83139	81.701	1.85592	81.7066	1.80933	81.7052	1.89914
81.7998	1.80974	81.7997	1.83242	81.7986	1.84852	81.8042	1.80952	81.8028	1.89942
81.8974	1.80882	81.8973	1.8334	81.8962	1.84271	81.9018	1.80974	81.9005	1.89957
81.995	1.80775	81.995	1.83435	81.9938	1.84021	81.9995	1.81	81.9981	1.89933
82.0926	1.80645	82.0926	1.83521	82.0914	1.84132	82.0971	1.81009	82.0957	1.89914
82.1902	1.80496	82.1902	1.83616	82.189	1.84603	82.1947	1.81013	82.1933	1.89893
82.2878	1.80336	82.2878	1.83722	82.2866	1.85383	82.2923	1.81025	82.2909	1.89875
82.3854	1.8019	82.3854	1.8382	82.3843	1.86293	82.3899	1.81025	82.3885	1.89876
82.4831	1.80048	82.483	1.83908	82.4819	1.87187	82.4875	1.81012	82.4861	1.89878
82.5807	1.79894	82.5806	1.8399	82.5795	1.88105	82.5852	1.80994	82.5838	1.89877
82.6783	1.79739	82.6783	1.84082	82.6771	1.89257	82.6828	1.8094	82.6814	1.89869
82.7759	1.796	82.7759	1.84167	82.7747	1.90824	82.7804	1.80901	82.779	1.89863
82.8735	1.79466	82.8735	1.84225	82.8723	1.92737	82.878	1.80864	82.8766	1.89852
82.9711	1.79315	82.9711	1.84272	82.9699	1.94847	82.9756	1.80832	82.9742	1.89837
83.0687	1.7916	83.0687	1.84311	83.0675	1.97072	83.0732	1.80812	83.0718	1.8984
83.1663	1.79016	83.1663	1.84344	83.1652	1.99401	83.1709	1.80804	83.1695	1.89837
83.264	1.78876	83.2639	1.84354	83.2628	2.01726	83.2685	1.80801	83.2671	1.89822
83.3616	1.78739	83.3616	1.84376	83.3604	2.03954	83.3661	1.80805	83.3647	1.89809
83.4592	1.78602	83.4592	1.84389	83.458	2.06162	83.4637	1.8083	83.4623	1.89798
83.5568	1.78481	83.5568	1.84407	83.5556	2.08364	83.5613	1.80837	83.5599	1.89808
83.6544	1.78359	83.6544	1.84421	83.6532	2.10613	83.6589	1.80888	83.6576	1.89803
83.752	1.7825	83.752	1.84426	83.7508	2.12748	83.7566	1.8095	83.7552	1.89799
83.8496	1.78138	83.8496	1.84434	83.8484	2.14639	83.8542	1.81011	83.8528	1.89785
83.9473	1.78044	83.9472	1.84438	83.9461	2.16181	83.9518	1.81088	83.9504	1.89809
84.0449	1.7797	84.0448	1.84468	84.0437	2.1753	84.0494	1.81169	84.048	1.89808
84.1425	1.77911	84.1425	1.84476	84.1413	2.18695	84.147	1.81266	84.1456	1.89807
84.2401	1.77854	84.2401	1.84485	84.2389	2.19693	84.2446	1.81361	84.2432	1.89805
84.3377	1.778	84.3377	1.84504	84.3365	2.20689	84.3423	1.81468	84.3409	1.89783
84.4353	1.77744	84.4353	1.84543	84.4341	2.21779	84.4399	1.81587	84.4385	1.89759
84.5329	1.77697	84.5329	1.84591	84.5317	2.23002	84.5375	1.81716	84.5361	1.89721
84.6305	1.77653	84.6305	1.8463	84.6294	2.24232	84.6351	1.81856	84.6337	1.89693
84.7281	1.77611	84.7281	1.84715	84.727	2.25275	84.7327	1.82004	84.7313	1.8966
84.8258	1.77583	84.8257	1.84811	84.8246	2.26095	84.8303	1.82151	84.8289	1.89621
84.9234	1.77555	84.9234	1.84938	84.9222	2.26713	84.928	1.82297	84.9266	1.89557
85.021	1.77531	85.021	1.85061	85.0198	2.27201	85.0256	1.82452	85.0242	1.89476
85.1186	1.77498	85.1186	1.8521	85.1174	2.27675	85.1232	1.82607	85.1218	1.89382
85.2162	1.7746	85.2162	1.85386	85.215	2.28283	85.2208	1.82773	85.2194	1.89286
85.3138	1.77433	85.3138	1.85584	85.3126	2.29061	85.3184	1.8292	85.317	1.89181
85.4114	1.77415	85.4114	1.85797	85.4103	2.29857	85.416	1.83051	85.4146	1.89074
85.509	1.77399	85.509	1.85991	85.5079	2.30592	85.5137	1.83194	85.5123	1.88962
85.6067	1.77388	85.6066	1.86189	85.6055	2.31166	85.6113	1.83312	85.6099	1.88832
85.7043	1.77363	85.7043	1.86362	85.7031	2.31659	85.7089	1.83422	85.7075	1.88711
85.8019	1.77338	85.8019	1.86518	85.8007	2.32223	85.8065	1.8354	85.8051	1.886
85.8995	1.77296	85.8995	1.86662	85.8983	2.3301	85.9041	1.83652	85.9027	1.88483
85.9971	1.77237	85.9971	1.86788	85.9959	2.33906	86.0017	1.83763	86.0003	1.88366
86.0947	1.77181	86.0947	1.86914	86.0935	2.34757	86.0994	1.83868	86.0979	1.88228
86.1923	1.7714	86.1923	1.8701	86.1912	2.35396	86.197	1.83966	86.1956	1.88093
86.2899	1.77081	86.2899	1.87066	86.2888	2.35726	86.2946	1.84054	86.2932	1.87971
86.3875	1.77004	86.3875	1.87085	86.3864	2.35797	86.3922	1.84148	86.3908	1.87842
86.4852	1.76917	86.4852	1.87083	86.484	2.35648	86.4898	1.84233	86.4884	1.87726
86.5828	1.76858	86.5828	1.87066	86.5816	2.35272	86.5874	1.84319	86.586	1.87613
86.6804	1.76805	86.6804	1.87004	86.6792	2.34633	86.6851	1.84401	86.6836	1.875
86.778	1.76748	86.778	1.86942	86.7768	2.33733	86.7827	1.84512	86.7813	1.87394
86.8756	1.76711	86.8756	1.86858	86.8744	2.32611	86.8803	1.84623	86.8789	1.87306
86.9732	1.7668	86.9732	1.8675	86.9721	2.31326	86.9779	1.8472	86.9765	1.87232
87.0708	1.76656	87.0708	1.86612	87.0697	2.29879	87.0755	1.84816	87.0741	1.87188
87.1685	1.76638	87.1684	1.86462	87.1673	2.28275	87.1731	1.84906	87.1717	1.87143
87.2661	1.76622	87.2661	1.863	87.2649	2.26512	87.2708	1.85012	87.2693	1.87094
87.3637	1.76608	87.3637	1.86119	87.3625	2.24683	87.3684	1.85122	87.367	1.87065
87.4613	1.76597	87.4613	1.85956	87.4601	2.22813	87.466	1.85235	87.4646	1.87032
87.5589	1.76573	87.5589	1.85775	87.5577	2.21049	87.5636	1.8536	87.5622	1.87024
87.6565	1.76555	87.6565	1.85601	87.6553	2.19485	87.6612	1.85475	87.6598	1.87008
87.7541	1.76526	87.7541	1.85447	87.753	2.18092	87.7588	1.8557	87.7574	1.86998
87.8517	1.76512	87.8518	1.85286	87.8506	2.16616	87.8565	1.85657	87.855	1.86984
87.9493	1.76512	87.9494	1.85141	87.9482	2.14931	87.9541	1.85742	87.9527	1.86979
88.047	1.76507	88.047	1.85026	88.0458	2.13168	88.0517	1.85813	88.0503	1.86998
88.1446	1.76493	88.1446	1.84931	88.1434	2.11519	88.1493	1.85884	88.1479	1.87023
88.2422	1.76489	88.2422	1.84865	88.241	2.10012	88.2469	1.85955	88.2455	1.87045
88.3398	1.76501	88.3398	1.8481	88.3386	2.08528	88.3445	1.86011	88.3431	1.87076
88.4374	1.76526	88.4374	1.84766	88.4362	2.0699	88.4422	1.86047	88.4407	1.87098
88.535	1.7654	88.535	1.84743	88.5339	2.05427	88.5398	1.86061	88.5384	1.8712
88.6326	1.76546	88.6327	1.84732	88.6315	2.03885	88.6374	1.86087	88.636	1.87127
88.7302	1.76548	88.7303	1.84729	88.7291	2.02407	88.735	1.86068	88.7336	1.8713
88.8279	1.76549	88.8279	1.84745	88.8267	2.0112	88.8326	1.86034	88.8312	1.87145
88.9255	1.76539	88.9255	1.84802	88.9243	2.00039	88.9302	1.86008	88.9288	1.8716
89.0231	1.76524	89.0231	1.84849	89.0219	1.99063	89.0279	1.85983	89.0264	1.87135
89.1207	1.76499	89.1207	1.8489	89.1195	1.98173	89.1255	1.85938	89.124	1.87119
89.2183	1.76469	89.2183	1.84917	89.2171	1.97316	89.2231	1.85872	89.2217	1.8712
89.3159	1.76436	89.3159	1.84971	89.3148	1.96453	89.3207	1.85794	89.3193	1.87107
89.4135	1.76387	89.4136	1.85006	89.4124	1.95595	89.4183	1.85693	89.4169	1.87108
89.5111	1.76334	89.5112	1.85058	89.51	1.94655	89.516	1.85574	89.5145	1.87114
89.6087	1.76297	89.6088	1.8512	89.6076	1.93592	89.6136	1.85457	89.6121	1.87126
89.7064	1.76276	89.7064	1.85168	89.7052	1.92325	89.7112	1.8534	89.7097	1.87145
89.804	1.76254	89.804	1.8524	89.8028	1.90974	89.8088	1.85201	89.8074	1.87159
89.9016	1.76246	89.9016	1.85289	89.9004	1.89607	89.9064	1.85045	89.905	1.87178
89.9992	1.76245	89.9992	1.85332	89.998	1.88217	90.004	1.84881	90.0026	1.8721
90.0968	1.76246	90.0968	1.85356	90.0957	1.86675	90.1016	1.84704	90.1002	1.87244
90.1944	1.76257	90.1945	1.85384	90.1933	1.85064	90.1993	1.84512	90.1978	1.87282
90.292	1.7627	90.2921	1.85384	90.2909	1.83509	90.2969	1.84319	90.2954	1.87322
90.3896	1.76277	90.3897	1.85381	90.3885	1.82043	90.3945	1.8414	90.3931	1.87377
90.4873	1.76276	90.4873	1.85371	90.4861	1.80702	90.4921	1.83978	90.4907	1.87418
90.5849	1.76266	90.5849	1.85368	90.5837	1.79496	90.5897	1.83791	90.5883	1.87487
90.6825	1.76252	90.6825	1.85342	90.6813	1.78474	90.6873	1.83617	90.6859	1.87557
90.7801	1.76214	90.7801	1.85286	90.7789	1.77509	90.785	1.83459	90.7835	1.8762
90.8777	1.76179	90.8777	1.85207	90.8765	1.76563	90.8826	1.83294	90.8811	1.87678
90.9753	1.76138	90.9754	1.85141	90.9742	1.75638	90.9802	1.83118	90.9788	1.87747
91.0729	1.76113	91.073	1.8508	91.0718	1.74694	91.0778	1.82962	91.0764	1.87811
91.1705	1.76078	91.1706	1.85016	91.1694	1.73757	91.1754	1.82827	91.174	1.87874
91.2682	1.76041	91.2682	1.84943	91.267	1.72873	91.273	1.82703	91.2716	1.87945
91.3658	1.7602	91.3658	1.84879	91.3646	1.7208	91.3707	1.82596	91.3692	1.88017
91.4634	1.76018	91.4634	1.84805	91.4622	1.7147	91.4683	1.8251	91.4668	1.88078
91.561	1.76006	91.561	1.84727	91.5598	1.71091	91.5659	1.82444	91.5645	1.88144
91.6586	1.75994	91.6586	1.84645	91.6574	1.70954	91.6635	1.82394	91.6621	1.88203
91.7562	1.75991	91.7563	1.84541	91.7551	1.71087	91.7611	1.82367	91.7597	1.88277
91.8538	1.75971	91.8539	1.84455	91.8527	1.7152	91.8588	1.82365	91.8573	1.88363
91.9514	1.75938	91.9515	1.84354	91.9503	1.72241	91.9564	1.82385	91.9549	1.88444
92.0491	1.759	92.0491	1.8428	92.0479	1.73235	92.054	1.82414	92.0525	1.88536
92.1467	1.75857	92.1467	1.84191	92.1455	1.744	92.1516	1.8247	92.1501	1.88623
92.2443	1.75806	92.2443	1.84141	92.2431	1.75659	92.2492	1.82536	92.2478	1.88693
92.3419	1.75754	92.3419	1.84104	92.3407	1.76971	92.3468	1.82616	92.3454	1.88741
92.4395	1.75701	92.4396	1.84072	92.4383	1.78267	92.4445	1.82702	92.443	1.88814
92.5371	1.75655	92.5372	1.84046	92.536	1.79589	92.5421	1.82781	92.5406	1.88882
92.6347	1.75614	92.6348	1.84047	92.6336	1.80898	92.6397	1.82869	92.6382	1.88949
92.7323	1.75578	92.7324	1.84073	92.7312	1.82123	92.7373	1.82957	92.7358	1.89001
92.8299	1.75537	92.83	1.84116	92.8288	1.83303	92.8349	1.83062	92.8335	1.89044
92.9276	1.7552	92.9276	1.8418	92.9264	1.84519	92.9325	1.83174	92.9311	1.89097
93.0252	1.755	93.0252	1.84236	93.024	1.8578	93.0301	1.83292	93.0287	1.89153
93.1228	1.75493	93.1229	1.84303	93.1216	1.87036	93.1278	1.83398	93.1263	1.89199
93.2204	1.75495	93.2205	1.84331	93.2193	1.88158	93.2254	1.8352	93.2239	1.89249
93.318	1.75508	93.3181	1.84353	93.3169	1.89112	93.323	1.83641	93.3215	1.89305
93.4156	1.75503	93.4157	1.84365	93.4145	1.89836	93.4206	1.83744	93.4192	1.89349
93.5132	1.75505	93.5133	1.84375	93.5121	1.90281	93.5182	1.83855	93.5168	1.89388
93.6108	1.75513	93.6109	1.84399	93.6097	1.90658	93.6158	1.83968	93.6144	1.89414
93.7085	1.75527	93.7085	1.84427	93.7073	1.9115	93.7135	1.84088	93.712	1.89433
93.8061	1.75552	93.8061	1.84442	93.8049	1.91629	93.8111	1.84197	93.8096	1.89428
93.9037	1.7558	93.9038	1.84452	93.9025	1.91951	93.9087	1.84297	93.9072	1.89397
94.0013	1.75618	94.0014	1.84441	94.0002	1.92074	94.0063	1.84398	94.0048	1.89354
94.0989	1.75653	94.099	1.84448	94.0978	1.9215	94.1039	1.8449	94.1025	1.89314
94.1965	1.75696	94.1966	1.84453	94.1954	1.92362	94.2016	1.84574	94.2001	1.89277
94.2941	1.7573	94.2942	1.8444	94.293	1.92776	94.2992	1.84645	94.2977	1.89244
94.3917	1.75782	94.3918	1.84414	94.3906	1.93374	94.3968	1.84717	94.3953	1.89184
94.4893	1.75844	94.4894	1.84371	94.4882	1.94019	94.4944	1.84797	94.4929	1.89123
94.587	1.75907	94.587	1.84292	94.5858	1.94586	94.592	1.84871	94.5906	1.89088
94.6846	1.75962	94.6847	1.84218	94.6834	1.95036	94.6896	1.84932	94.6882	1.8909
94.7822	1.76031	94.7823	1.84115	94.7811	1.95391	94.7873	1.84977	94.7858	1.89114
94.8798	1.76085	94.8799	1.83987	94.8787	1.95766	94.8849	1.85025	94.8834	1.89149
94.9774	1.76119	94.9775	1.83883	94.9763	1.96247	94.9825	1.85048	94.981	1.89195
95.075	1.76156	95.0751	1.83768	95.0739	1.96726	95.0801	1.8506	95.0786	1.8926
95.1726	1.76182	95.1727	1.83702	95.1715	1.97119	95.1777	1.85034	95.1762	1.89329
95.2703	1.76198	95.2703	1.83671	95.2691	1.97504	95.2753	1.84998	95.2739	1.89374
95.3679	1.76219	95.3679	1.83681	95.3667	1.97932	95.3729	1.84955	95.3715	1.89457
95.4655	1.76234	95.4656	1.8371	95.4643	1.98376	95.4706	1.84891	95.4691	1.89538
95.5631	1.76236	95.5632	1.8375	95.562	1.98646	95.5682	1.84795	95.5667	1.89625
95.6607	1.76234	95.6608	1.83784	95.6596	1.98598	95.6658	1.84687	95.6643	1.89699
95.7583	1.76208	95.7584	1.8384	95.7572	1.98445	95.7634	1.84569	95.7619	1.89792
95.8559	1.7618	95.856	1.83909	95.8548	1.9839	95.861	1.84445	95.8596	1.8989
95.9535	1.76152	95.9536	1.83976	95.9524	1.98457	95.9586	1.8432	95.9572	1.89989
96.0511	1.7613	96.0512	1.8404	96.05	1.98679	96.0563	1.84219	96.0548	1.90079
96.1488	1.76101	96.1489	1.8408	96.1476	1.99091	96.1539	1.84134	96.1524	1.90171
96.2464	1.76097	96.2465	1.84098	96.2452	1.99528	96.2515	1.84051	96.25	1.90285
96.344	1.76085	96.3441	1.84102	96.3429	1.99836	96.3491	1.83963	96.3476	1.90398
96.4416	1.76073	96.4417	1.84099	96.4405	2.00077	96.4467	1.83873	96.4453	1.9051
96.5392	1.76058	96.5393	1.841	96.5381	2.00342	96.5444	1.83799	96.5429	1.90599
96.6368	1.76063	96.6369	1.84084	96.6357	2.00825	96.642	1.83739	96.6405	1.90665
96.7344	1.7609	96.7345	1.84068	96.7333	2.01398	96.7396	1.83697	96.7381	1.90721
96.832	1.76148	96.8321	1.84042	96.8309	2.01717	96.8372	1.83667	96.8357	1.90762
96.9297	1.76237	96.9298	1.83983	96.9285	2.01723	96.9348	1.83668	96.9333	1.90779
97.0273	1.7632	97.0274	1.8392	97.0261	2.01493	97.0324	1.83685	97.0309	1.90779
97.1249	1.76433	97.125	1.83828	97.1238	2.01014	97.1301	1.83734	97.1286	1.90784
97.2225	1.76561	97.2226	1.83701	97.2214	2.00318	97.2277	1.83798	97.2262	1.90802
97.3201	1.76687	97.3202	1.83532	97.319	1.99537	97.3253	1.83888	97.3238	1.90799
97.4177	1.76814	97.4178	1.83338	97.4166	1.98803	97.4229	1.83999	97.4214	1.90792
97.5153	1.76959	97.5154	1.83115	97.5142	1.98109	97.5205	1.84141	97.519	1.90796
97.6129	1.77113	97.613	1.82895	97.6118	1.97302	97.6181	1.84274	97.6166	1.90806
97.7105	1.77295	97.7107	1.82642	97.7094	1.96242	97.7157	1.84427	97.7143	1.908
97.8082	1.7748	97.8083	1.82386	97.807	1.95008	97.8134	1.8459	97.8119	1.90804
97.9058	1.7767	97.9059	1.82141	97.9047	1.93746	97.911	1.84748	97.9095	1.90805
98.0034	1.77861	98.0035	1.81881	98.0023	1.9229	98.0086	1.84884	98.0071	1.90811
98.101	1.78048	98.1011	1.81647	98.0999	1.90479	98.1062	1.85007	98.1047	1.90817
98.1986	1.78219	98.1987	1.81463	98.1975	1.88372	98.2038	1.85139	98.2023	1.90794
98.2962	1.78407	98.2963	1.81284	98.2951	1.86223	98.3014	1.85271	98.3	1.90786
98.3938	1.78583	98.394	1.81117	98.3927	1.84113	98.3991	1.85403	98.3976	1.90752
98.4915	1.78771	98.4916	1.80988	98.4903	1.82103	98.4967	1.85522	98.4952	1.90701
98.5891	1.78946	98.5892	1.80862	98.588	1.80081	98.5943	1.85652	98.5928	1.90644
98.6867	1.79083	98.6868	1.80765	98.6856	1.7813	98.6919	1.85761	98.6904	1.90566
98.7843	1.79188	98.7844	1.80694	98.7832	1.7641	98.7895	1.8585	98.788	1.90468
98.8819	1.79268	98.882	1.80642	98.8808	1.74887	98.8871	1.85933	98.8857	1.90366
98.9795	1.79353	98.9796	1.80619	98.9784	1.73724	98.9848	1.86	98.9833	1.9025
99.0771	1.79416	99.0772	1.80613	99.076	1.73092	99.0824	1.8605	99.0809	1.90102
99.1747	1.79455	99.1749	1.8062	99.1736	1.72846	99.18	1.86084	99.1785	1.8996
99.2723	1.79482	99.2725	1.80668	99.2712	1.72716	99.2776	1.86083	99.2761	1.89811
99.37	1.79523	99.3701	1.80745	99.3689	1.72474	99.3752	1.86047	99.3737	1.8967
99.4676	1.79558	99.4677	1.80806	99.4665	1.72147	99.4729	1.8599	99.4714	1.89518
99.5652	1.79569	99.5653	1.80871	99.5641	1.71928	99.5705	1.85941	99.569	1.89363
99.6628	1.79567	99.6629	1.80951	99.6617	1.71937	99.6681	1.85869	99.6666	1.89237
99.7604	1.79572	99.7605	1.81023	99.7593	1.72079	99.7657	1.85777	99.7642	1.8912
99.858	1.79566	99.8581	1.81115	99.8569	1.72279	99.8633	1.85684	99.8618	1.89018
99.9556	1.79574	99.9558	1.81188	99.9545	1.72514	99.9609	1.85603	99.9594	1.88927
100.053	1.79596	100.053	1.81244	100.052	1.72687	100.059	1.85509	100.057	1.88834
100.151	1.79647	100.151	1.8127	100.15	1.72895	100.156	1.85406	100.155	1.88746
100.248	1.79685	100.249	1.813	100.247	1.73098	100.254	1.85308	100.252	1.88644
100.346	1.79737	100.346	1.81322	100.345	1.73297	100.351	1.85223	100.35	1.88566
100.444	1.79785	100.444	1.81341	100.443	1.7345	100.449	1.85141	100.448	1.88497
100.541	1.79851	100.541	1.81366	100.54	1.73672	100.547	1.85022	100.545	1.88432
100.639	1.79938	100.639	1.81379	100.638	1.74041	100.644	1.84916	100.643	1.8836
100.737	1.80044	100.737	1.81385	100.735	1.74431	100.742	1.84815	100.74	1.88298
100.834	1.80152	100.834	1.81373	100.833	1.74671	100.839	1.84696	100.838	1.88248
100.932	1.80261	100.932	1.81361	100.931	1.74663	100.937	1.84577	100.936	1.88198
101.029	1.80366	101.03	1.81332	101.028	1.74609	101.035	1.84464	101.033	1.88171
101.127	1.80471	101.127	1.81282	101.126	1.7468	101.132	1.84342	101.131	1.8812
101.225	1.80603	101.225	1.81208	101.223	1.74996	101.23	1.84245	101.228	1.88076
101.322	1.80722	101.322	1.81127	101.321	1.75641	101.328	1.84156	101.326	1.88019
101.42	1.80836	101.42	1.81078	101.419	1.76544	101.425	1.84061	101.424	1.87969
101.517	1.80957	101.518	1.81022	101.516	1.7753	101.523	1.83975	101.521	1.87923
101.615	1.81085	101.615	1.80972	101.614	1.78487	101.62	1.83896	101.619	1.87868
101.713	1.81196	101.713	1.80923	101.712	1.79503	101.718	1.83816	101.717	1.87816
101.81	1.81331	101.81	1.80854	101.809	1.80601	101.816	1.83724	101.814	1.87742
101.908	1.81451	101.908	1.80816	101.907	1.81708	101.913	1.8361	101.912	1.87671
102.005	1.81569	102.006	1.80776	102.004	1.82816	102.011	1.835	102.009	1.87605
102.103	1.81659	102.103	1.80762	102.102	1.83794	102.108	1.83398	102.107	1.87551
102.201	1.81742	102.201	1.80735	102.2	1.84607	102.206	1.83264	102.205	1.87491
102.298	1.81816	102.298	1.8071	102.297	1.85249	102.304	1.83123	102.302	1.87438
102.396	1.81867	102.396	1.80648	102.395	1.85781	102.401	1.82976	102.4	1.87396
102.494	1.81906	102.494	1.80556	102.492	1.86101	102.499	1.82839	102.497	1.87352
102.591	1.81931	102.591	1.80454	102.59	1.86079	102.597	1.82675	102.595	1.87317
102.689	1.81934	102.689	1.80366	102.688	1.85881	102.694	1.82518	102.693	1.87274
102.786	1.81932	102.787	1.80279	102.785	1.85853	102.792	1.82365	102.79	1.87239
102.884	1.81914	102.884	1.80189	102.883	1.86103	102.889	1.82213	102.888	1.87215
102.982	1.81883	102.982	1.8011	102.981	1.86407	102.987	1.82044	102.986	1.87174
103.079	1.81859	103.079	1.8003	103.078	1.86669	103.085	1.81872	103.083	1.87169
103.177	1.81815	103.177	1.7996	103.176	1.8683	103.182	1.81698	103.181	1.87177
103.274	1.81757	103.275	1.79888	103.273	1.86819	103.28	1.81533	103.278	1.87194
103.372	1.81702	103.372	1.7983	103.371	1.86714	103.378	1.8138	103.376	1.87202
103.47	1.81648	103.47	1.7979	103.469	1.86698	103.475	1.81209	103.474	1.87218
103.567	1.81589	103.567	1.79748	103.566	1.8681	103.573	1.81052	103.571	1.87232
103.665	1.81544	103.665	1.79705	103.664	1.86847	103.67	1.80894	103.669	1.87251
103.762	1.81487	103.763	1.79682	103.761	1.86634	103.768	1.80738	103.766	1.87287
103.86	1.81421	103.86	1.79639	103.859	1.86317	103.866	1.80597	103.864	1.87313
103.958	1.81342	103.958	1.79607	103.957	1.86047	103.963	1.80471	103.962	1.87344
104.055	1.81271	104.056	1.79562	104.054	1.85932	104.061	1.80345	104.059	1.87357
104.153	1.81196	104.153	1.79533	104.152	1.86034	104.158	1.80232	104.157	1.87392
104.251	1.81134	104.251	1.79507	104.249	1.8642	104.256	1.80117	104.255	1.874
104.348	1.81084	104.348	1.7949	104.347	1.8704	104.354	1.80002	104.352	1.8741
104.446	1.81034	104.446	1.79499	104.445	1.87762	104.451	1.79901	104.45	1.87418
104.543	1.80988	104.544	1.79509	104.542	1.88567	104.549	1.79828	104.547	1.87441
104.641	1.80951	104.641	1.79523	104.64	1.89411	104.647	1.79745	104.645	1.87456
104.739	1.80907	104.739	1.79549	104.738	1.90184	104.744	1.79666	104.743	1.87466
104.836	1.80883	104.836	1.79559	104.835	1.90809	104.842	1.79585	104.84	1.87469
104.934	1.80876	104.934	1.79567	104.933	1.91345	104.939	1.79518	104.938	1.87491
105.031	1.80872	105.032	1.79607	105.03	1.91789	105.037	1.79476	105.035	1.87497
105.129	1.80852	105.129	1.79638	105.128	1.92185	105.135	1.79436	105.133	1.87493
105.227	1.80851	105.227	1.7965	105.226	1.92652	105.232	1.79386	105.231	1.87502
105.324	1.80846	105.324	1.79647	105.323	1.93182	105.33	1.79333	105.328	1.87522
105.422	1.80842	105.422	1.79639	105.421	1.93878	105.427	1.79289	105.426	1.87535
105.52	1.80834	105.52	1.79637	105.518	1.94734	105.525	1.79223	105.524	1.87535
105.617	1.80828	105.617	1.79617	105.616	1.95797	105.623	1.79179	105.621	1.87515
105.715	1.80822	105.715	1.79565	105.714	1.97158	105.72	1.79161	105.719	1.87491
105.812	1.80837	105.813	1.79538	105.811	1.9873	105.818	1.79143	105.816	1.87474
105.91	1.8087	105.91	1.79516	105.909	2.0038	105.916	1.79117	105.914	1.87452
106.008	1.80903	106.008	1.79485	106.007	2.02044	106.013	1.79079	106.012	1.87442
106.105	1.80968	106.105	1.79451	106.104	2.0362	106.111	1.79043	106.109	1.87408
106.203	1.81025	106.203	1.79457	106.202	2.04879	106.208	1.79018	106.207	1.87374
106.3	1.81097	106.301	1.79476	106.299	2.05725	106.306	1.78996	106.304	1.87328
106.398	1.81173	106.398	1.79506	106.397	2.06153	106.404	1.78941	106.402	1.87282
106.496	1.81254	106.496	1.79558	106.495	2.0629	106.501	1.78877	106.5	1.87233
106.593	1.81333	106.593	1.79598	106.592	2.06214	106.599	1.78805	106.597	1.87218
106.691	1.81423	106.691	1.79653	106.69	2.0596	106.696	1.78724	106.695	1.87199
106.788	1.81499	106.789	1.79716	106.787	2.05668	106.794	1.78648	106.793	1.87172
106.886	1.81572	106.886	1.79762	106.885	2.05537	106.892	1.78571	106.89	1.87121
106.984	1.8164	106.984	1.79815	106.983	2.05591	106.989	1.78486	106.988	1.87064
107.081	1.81728	107.082	1.79872	107.08	2.05821	107.087	1.78394	107.085	1.8701
107.179	1.81808	107.179	1.7992	107.178	2.06264	107.185	1.78297	107.183	1.86944
107.277	1.81878	107.277	1.79971	107.275	2.06953	107.282	1.78206	107.281	1.86858
107.374	1.81937	107.374	1.8003	107.373	2.07757	107.38	1.78143	107.378	1.86783
107.472	1.82005	107.472	1.80086	107.471	2.08557	107.477	1.78098	107.476	1.86724
107.569	1.82054	107.57	1.80192	107.568	2.09279	107.575	1.78065	107.573	1.86655
107.667	1.82109	107.667	1.80313	107.666	2.09821	107.673	1.78032	107.671	1.86575
107.765	1.82151	107.765	1.80418	107.764	2.10027	107.77	1.78008	107.769	1.86476
107.862	1.82174	107.862	1.8056	107.861	2.09806	107.868	1.77997	107.866	1.86393
107.96	1.82199	107.96	1.80724	107.959	2.09207	107.965	1.77999	107.964	1.86314
108.057	1.82188	108.058	1.80917	108.056	2.08325	108.063	1.78008	108.062	1.86244
108.155	1.82182	108.155	1.81083	108.154	2.07398	108.161	1.78019	108.159	1.86208
108.253	1.82169	108.253	1.81246	108.252	2.06584	108.258	1.78057	108.257	1.86186
108.35	1.8216	108.35	1.81411	108.349	2.06035	108.356	1.7811	108.354	1.86154
108.448	1.82133	108.448	1.81574	108.447	2.05818	108.454	1.7817	108.452	1.86116
108.545	1.82116	108.546	1.81727	108.544	2.06028	108.551	1.78229	108.55	1.86082
108.643	1.82077	108.643	1.81874	108.642	2.06646	108.649	1.7829	108.647	1.86065
108.741	1.82048	108.741	1.82049	108.74	2.07567	108.746	1.78349	108.745	1.8606
108.838	1.82009	108.839	1.82221	108.837	2.08551	108.844	1.78396	108.842	1.86066
108.936	1.81974	108.936	1.82353	108.935	2.09486	108.942	1.78447	108.94	1.86067
109.034	1.81932	109.034	1.82486	109.033	2.10183	109.039	1.78522	109.038	1.86058
109.131	1.81889	109.131	1.82643	109.13	2.10485	109.137	1.78611	109.135	1.86053
109.229	1.8185	109.229	1.82803	109.228	2.10346	109.234	1.78685	109.233	1.86069
109.326	1.81807	109.327	1.82941	109.325	2.09755	109.332	1.7874	109.331	1.86094
109.424	1.81751	109.424	1.83073	109.423	2.08753	109.43	1.78789	109.428	1.86119
109.522	1.81711	109.522	1.83185	109.521	2.07374	109.527	1.78816	109.526	1.86171
109.619	1.81659	109.619	1.83306	109.618	2.05731	109.625	1.78834	109.623	1.86232
109.717	1.81607	109.717	1.83416	109.716	2.04026	109.723	1.78866	109.721	1.86317
109.814	1.8157	109.815	1.835	109.813	2.0243	109.82	1.78893	109.819	1.86404
109.912	1.81518	109.912	1.83586	109.911	2.01003	109.918	1.789	109.916	1.8649
110.01	1.81482	110.01	1.83633	110.009	1.99822	110.015	1.78886	110.014	1.86575
110.107	1.81436	110.108	1.83695	110.106	1.98759	110.113	1.78872	110.111	1.86637
110.205	1.81389	110.205	1.83756	110.204	1.97705	110.211	1.78833	110.209	1.86706
110.302	1.8135	110.303	1.83804	110.301	1.96681	110.308	1.78814	110.307	1.86777
110.4	1.81337	110.4	1.83846	110.399	1.95706	110.406	1.78801	110.404	1.86852
110.498	1.81308	110.498	1.83866	110.497	1.94678	110.504	1.78808	110.502	1.86889
110.595	1.81307	110.596	1.83877	110.594	1.93558	110.601	1.78821	110.6	1.86926
110.693	1.81284	110.693	1.83856	110.692	1.92285	110.699	1.78827	110.697	1.86955
110.791	1.81263	110.791	1.83845	110.79	1.90848	110.796	1.7885	110.795	1.86991
110.888	1.81235	110.888	1.83853	110.887	1.8931	110.894	1.7888	110.892	1.87038
110.986	1.81219	110.986	1.83854	110.985	1.8781	110.992	1.7889	110.99	1.87116
111.083	1.81202	111.084	1.8382	111.082	1.86417	111.089	1.7889	111.088	1.87185
111.181	1.8118	111.181	1.83773	111.18	1.85193	111.187	1.78893	111.185	1.8725
111.279	1.81151	111.279	1.8373	111.278	1.84108	111.284	1.78865	111.283	1.87291
111.376	1.81119	111.376	1.83669	111.375	1.83246	111.382	1.78836	111.38	1.87339
111.474	1.81095	111.474	1.83605	111.473	1.8267	111.48	1.78813	111.478	1.87371
111.571	1.81056	111.572	1.83521	111.57	1.82374	111.577	1.78803	111.576	1.87397
111.669	1.81019	111.669	1.83449	111.668	1.82404	111.675	1.7876	111.673	1.87411
111.767	1.8097	111.767	1.8336	111.766	1.82743	111.773	1.78684	111.771	1.8741
111.864	1.80922	111.865	1.83254	111.863	1.83384	111.87	1.78609	111.869	1.87399
111.962	1.80854	111.962	1.83153	111.961	1.84283	111.968	1.78566	111.966	1.87379
112.06	1.8078	112.06	1.83045	112.059	1.85628	112.065	1.78515	112.064	1.87365
112.157	1.80708	112.157	1.82947	112.156	1.87448	112.163	1.78464	112.161	1.87331
112.255	1.80625	112.255	1.82847	112.254	1.89653	112.261	1.7841	112.259	1.87316
112.352	1.80542	112.353	1.82789	112.351	1.91938	112.358	1.78342	112.357	1.87299
112.45	1.80462	112.45	1.82779	112.449	1.94188	112.456	1.78261	112.454	1.87316
112.548	1.80378	112.548	1.82791	112.547	1.96257	112.553	1.78164	112.552	1.8734
112.645	1.8031	112.645	1.8282	112.644	1.98024	112.651	1.78083	112.65	1.87386
112.743	1.80241	112.743	1.82882	112.742	1.99491	112.749	1.78011	112.747	1.87439
112.84	1.80177	112.841	1.82949	112.839	2.00675	112.846	1.77922	112.845	1.8749
112.938	1.80115	112.938	1.83035	112.937	2.01598	112.944	1.77829	112.942	1.87514
113.036	1.80064	113.036	1.8316	113.035	2.0227	113.042	1.77753	113.04	1.8755
113.133	1.80023	113.134	1.83303	113.132	2.02617	113.139	1.77712	113.138	1.876
113.231	1.80001	113.231	1.83453	113.23	2.02645	113.237	1.77702	113.235	1.87663
113.328	1.79994	113.329	1.83613	113.327	2.02447	113.334	1.77706	113.333	1.8771
113.426	1.79978	113.426	1.83761	113.425	2.02062	113.432	1.77717	113.43	1.87759
113.524	1.80004	113.524	1.83912	113.523	2.01545	113.53	1.77724	113.528	1.87811
113.621	1.80035	113.622	1.84066	113.62	2.00949	113.627	1.77749	113.626	1.87834
113.719	1.8008	113.719	1.84193	113.718	2.00384	113.725	1.7781	113.723	1.87857
113.817	1.80138	113.817	1.84341	113.816	1.99865	113.822	1.77919	113.821	1.87884
113.914	1.80201	113.914	1.84493	113.913	1.99294	113.92	1.78025	113.919	1.87941
114.012	1.80271	114.012	1.8462	114.011	1.98385	114.018	1.78127	114.016	1.87993
114.109	1.80337	114.11	1.84748	114.108	1.97081	114.115	1.78218	114.114	1.88027
114.207	1.80392	114.207	1.84877	114.206	1.9546	114.213	1.78315	114.211	1.8805
114.305	1.80424	114.305	1.84954	114.304	1.93643	114.311	1.78407	114.309	1.88072
114.402	1.80465	114.402	1.85012	114.401	1.91663	114.408	1.7852	114.407	1.88084
114.5	1.80488	114.5	1.85041	114.499	1.89656	114.506	1.78628	114.504	1.88074
114.597	1.80506	114.598	1.85047	114.596	1.87765	114.603	1.78736	114.602	1.88057
114.695	1.80534	114.695	1.85041	114.694	1.85993	114.701	1.78833	114.699	1.88031
114.793	1.80562	114.793	1.85028	114.792	1.84327	114.799	1.78926	114.797	1.88004
114.89	1.80601	114.891	1.85009	114.889	1.82916	114.896	1.79012	114.895	1.87981
114.988	1.80636	114.988	1.84998	114.987	1.81889	114.994	1.79095	114.992	1.87938
115.085	1.80666	115.086	1.84971	115.085	1.81328	115.091	1.79158	115.09	1.87893
115.183	1.80701	115.183	1.84954	115.182	1.81212	115.189	1.79205	115.188	1.8784
115.281	1.80739	115.281	1.84944	115.28	1.8135	115.287	1.79262	115.285	1.8779
115.378	1.80758	115.379	1.84942	115.377	1.81646	115.384	1.79299	115.383	1.87727
115.476	1.80749	115.476	1.84957	115.475	1.82064	115.482	1.79338	115.48	1.87668
115.574	1.80715	115.574	1.84973	115.573	1.82486	115.58	1.79361	115.578	1.87635
115.671	1.80673	115.671	1.85012	115.67	1.82871	115.677	1.79387	115.676	1.87605
115.769	1.80625	115.769	1.85009	115.768	1.83222	115.775	1.79377	115.773	1.87592
115.866	1.80567	115.867	1.84995	115.865	1.83653	115.872	1.79375	115.871	1.87563
115.964	1.80502	115.964	1.84966	115.963	1.8437	115.97	1.79385	115.968	1.87538
116.062	1.80434	116.062	1.84914	116.061	1.85405	116.068	1.79418	116.066	1.87527
116.159	1.80367	116.16	1.84827	116.158	1.86495	116.165	1.79449	116.164	1.87534
116.257	1.80306	116.257	1.84757	116.256	1.87548	116.263	1.79488	116.261	1.87537
116.354	1.80241	116.355	1.84658	116.353	1.88618	116.36	1.79535	116.359	1.87545
116.452	1.80194	116.452	1.84564	116.451	1.89668	116.458	1.79614	116.457	1.8755
116.55	1.80151	116.55	1.84464	116.549	1.90719	116.556	1.79721	116.554	1.87546
116.647	1.80093	116.648	1.84344	116.646	1.91762	116.653	1.79839	116.652	1.87525
116.745	1.80024	116.745	1.84212	116.744	1.92696	116.751	1.7999	116.749	1.87497
116.842	1.79948	116.843	1.84056	116.842	1.93226	116.849	1.8016	116.847	1.87454
116.94	1.79876	116.94	1.83898	116.939	1.93182	116.946	1.80339	116.945	1.87422
117.038	1.79809	117.038	1.83754	117.037	1.9262	117.044	1.80536	117.042	1.87372
117.135	1.79743	117.136	1.83592	117.134	1.91814	117.141	1.80755	117.14	1.87303
117.233	1.79661	117.233	1.83436	117.232	1.91049	117.239	1.80962	117.237	1.87233
117.331	1.796	117.331	1.8329	117.33	1.90381	117.337	1.81185	117.335	1.87173
117.428	1.79528	117.429	1.83135	117.427	1.89834	117.434	1.81393	117.433	1.8712
117.526	1.79482	117.526	1.82981	117.525	1.89338	117.532	1.8161	117.53	1.87065
117.623	1.79438	117.624	1.82827	117.622	1.88764	117.629	1.81811	117.628	1.87022
117.721	1.79383	117.721	1.82721	117.72	1.88016	117.727	1.82012	117.726	1.86955
117.819	1.79342	117.819	1.82628	117.818	1.87084	117.825	1.82202	117.823	1.86876
117.916	1.79294	117.917	1.82562	117.915	1.85977	117.922	1.82385	117.921	1.86803
118.014	1.79233	118.014	1.82507	118.013	1.84769	118.02	1.82552	118.018	1.86733
118.111	1.7918	118.112	1.82507	118.111	1.83749	118.118	1.82704	118.116	1.8666
118.209	1.79128	118.209	1.8249	118.208	1.82915	118.215	1.82856	118.214	1.86599
118.307	1.79076	118.307	1.82498	118.306	1.82143	118.313	1.82975	118.311	1.86531
118.404	1.79024	118.405	1.82513	118.403	1.81394	118.41	1.83083	118.409	1.86467
118.502	1.78966	118.502	1.82547	118.501	1.80774	118.508	1.83156	118.506	1.8639
118.6	1.78926	118.6	1.82615	118.599	1.80323	118.606	1.83225	118.604	1.86342
118.697	1.78906	118.697	1.82684	118.696	1.80187	118.703	1.83276	118.702	1.86311
118.795	1.78867	118.795	1.82767	118.794	1.80534	118.801	1.83311	118.799	1.86304
118.892	1.78815	118.893	1.82822	118.891	1.81381	118.899	1.83343	118.897	1.86295
118.99	1.78778	118.99	1.82865	118.989	1.826	118.996	1.83356	118.995	1.86314
119.088	1.78725	119.088	1.82911	119.087	1.83805	119.094	1.83367	119.092	1.86335
119.185	1.78674	119.186	1.82943	119.184	1.8481	119.191	1.83381	119.19	1.86362
119.283	1.78613	119.283	1.82975	119.282	1.85705	119.289	1.83405	119.287	1.86402
119.38	1.78564	119.381	1.83004	119.379	1.86492	119.387	1.83434	119.385	1.86431
119.478	1.78505	119.478	1.83034	119.477	1.87195	119.484	1.83467	119.483	1.86479
119.576	1.78428	119.576	1.83039	119.575	1.87879	119.582	1.8352	119.58	1.86515
119.673	1.78351	119.674	1.83029	119.672	1.88558	119.679	1.83581	119.678	1.86549
119.771	1.78283	119.771	1.83015	119.77	1.89138	119.777	1.83659	119.775	1.86601
119.868	1.78241	119.869	1.82992	119.868	1.89565	119.875	1.83744	119.873	1.86656
119.966	1.78199	119.966	1.8297	119.965	1.8977	119.972	1.83821	119.971	1.86705
120.064	1.78143	120.064	1.82937	120.063	1.89704	120.07	1.839	120.068	1.8675
120.161	1.78095	120.162	1.82936	120.16	1.89548	120.168	1.83973	120.166	1.86783
120.259	1.78039	120.259	1.82934	120.258	1.89419	120.265	1.84058	120.264	1.8682
120.357	1.77966	120.357	1.82935	120.356	1.89382	120.363	1.84151	120.361	1.86876
120.454	1.77899	120.454	1.82929	120.453	1.89335	120.46	1.84243	120.459	1.86958
120.552	1.77811	120.552	1.82933	120.551	1.89296	120.558	1.84308	120.556	1.87043
120.649	1.77703	120.65	1.82942	120.648	1.89167	120.656	1.84369	120.654	1.87152
120.747	1.77606	120.747	1.82956	120.746	1.88934	120.753	1.84419	120.752	1.87252
120.845	1.7749	120.845	1.82999	120.844	1.88683	120.851	1.84446	120.849	1.87335
120.942	1.77364	120.943	1.83031	120.941	1.88448	120.948	1.8448	120.947	1.87395
121.04	1.77254	121.04	1.83059	121.039	1.88287	121.046	1.84509	121.044	1.87464
121.137	1.77144	121.138	1.83117	121.137	1.88107	121.144	1.84517	121.142	1.87544
121.235	1.77037	121.235	1.83186	121.234	1.87819	121.241	1.84505	121.24	1.87618
121.333	1.76931	121.333	1.83265	121.332	1.87363	121.339	1.84479	121.337	1.87702
121.43	1.76823	121.431	1.83351	121.429	1.86737	121.437	1.84451	121.435	1.87765
121.528	1.76751	121.528	1.83439	121.527	1.8593	121.534	1.8443	121.533	1.87799
121.625	1.76677	121.626	1.83544	121.625	1.8506	121.632	1.84409	121.63	1.87822
121.723	1.76591	121.723	1.83664	121.722	1.84289	121.729	1.84372	121.728	1.87834
121.821	1.76504	121.821	1.83781	121.82	1.83594	121.827	1.84324	121.825	1.87848
121.918	1.76418	121.919	1.83918	121.917	1.82953	121.925	1.84268	121.923	1.87868
122.016	1.76342	122.016	1.84039	122.015	1.82361	122.022	1.84209	122.021	1.87915
122.114	1.76264	122.114	1.84117	122.113	1.81728	122.12	1.84165	122.118	1.87977
122.211	1.76198	122.212	1.84192	122.21	1.80968	122.217	1.84137	122.216	1.88034
122.309	1.76146	122.309	1.84262	122.308	1.80062	122.315	1.84103	122.313	1.88083
122.406	1.76085	122.407	1.8432	122.406	1.79007	122.413	1.84082	122.411	1.88119
122.504	1.76033	122.504	1.84358	122.503	1.77839	122.51	1.84062	122.509	1.8816
122.602	1.75996	122.602	1.84388	122.601	1.76704	122.608	1.84031	122.606	1.88193
122.699	1.75966	122.7	1.84417	122.698	1.75641	122.706	1.84008	122.704	1.88245
122.797	1.75944	122.797	1.84435	122.796	1.74627	122.803	1.84014	122.802	1.8832
122.894	1.75911	122.895	1.84457	122.894	1.736	122.901	1.84031	122.899	1.88411
122.992	1.75859	122.992	1.84481	122.991	1.72624	122.998	1.84042	122.997	1.88485
123.09	1.75803	123.09	1.84493	123.089	1.71874	123.096	1.84072	123.094	1.88533
123.187	1.75739	123.188	1.84478	123.186	1.71505	123.194	1.84091	123.192	1.88571
123.285	1.75665	123.285	1.84446	123.284	1.71466	123.291	1.84118	123.29	1.88586
123.382	1.75603	123.383	1.84392	123.382	1.71746	123.389	1.84148	123.387	1.88602
123.48	1.75517	123.481	1.8434	123.479	1.72292	123.486	1.84162	123.485	1.88642
123.578	1.75443	123.578	1.84267	123.577	1.72912	123.584	1.84166	123.582	1.88682
123.675	1.75364	123.676	1.84165	123.674	1.734	123.682	1.84169	123.68	1.88715
123.773	1.7529	123.773	1.84057	123.772	1.73787	123.779	1.8418	123.778	1.88735
123.871	1.75251	123.871	1.83915	123.87	1.74211	123.877	1.84196	123.875	1.88774
123.968	1.75228	123.969	1.83774	123.967	1.7461	123.975	1.8422	123.973	1.88801
124.066	1.75193	124.066	1.83649	124.065	1.74904	124.072	1.84234	124.071	1.8884
124.163	1.75166	124.164	1.83509	124.163	1.74994	124.17	1.84244	124.168	1.88869
124.261	1.7515	124.261	1.83359	124.26	1.74952	124.267	1.84253	124.266	1.88909
124.359	1.75141	124.359	1.83221	124.358	1.74845	124.365	1.84267	124.363	1.88956
124.456	1.75145	124.457	1.83085	124.455	1.74647	124.463	1.84314	124.461	1.88979
124.554	1.75144	124.554	1.82946	124.553	1.74335	124.56	1.84389	124.559	1.88982
124.651	1.75135	124.652	1.8278	124.651	1.73892	124.658	1.84485	124.656	1.88979
124.749	1.75132	124.749	1.82631	124.748	1.73348	124.755	1.84566	124.754	1.88958
124.847	1.75124	124.847	1.82505	124.846	1.72816	124.853	1.84643	124.851	1.88905
124.944	1.75131	124.945	1.82378	124.943	1.72349	124.951	1.84722	124.949	1.88851
125.042	1.75147	125.042	1.82248	125.041	1.71881	125.048	1.84814	125.047	1.88794
125.139	1.75162	125.14	1.82136	125.139	1.71352	125.146	1.84922	125.144	1.88746
125.237	1.75182	125.238	1.82033	125.236	1.70941	125.244	1.85045	125.242	1.88701
125.335	1.75187	125.335	1.81939	125.334	1.70721	125.341	1.85142	125.34	1.88651
125.432	1.75193	125.433	1.81868	125.432	1.70649	125.439	1.85232	125.437	1.8861
125.53	1.75189	125.53	1.81823	125.529	1.70753	125.536	1.85326	125.535	1.88575
125.628	1.75202	125.628	1.81827	125.627	1.71124	125.634	1.8541	125.632	1.88529
125.725	1.75197	125.726	1.8183	125.724	1.71785	125.732	1.85496	125.73	1.88496
125.823	1.75183	125.823	1.81839	125.822	1.72605	125.829	1.85585	125.828	1.88434
125.92	1.75142	125.921	1.8185	125.92	1.73541	125.927	1.85674	125.925	1.88359
126.018	1.75126	126.018	1.81872	126.017	1.7456	126.024	1.85763	126.023	1.88237
126.116	1.75105	126.116	1.81922	126.115	1.75704	126.122	1.85837	126.121	1.88125
126.213	1.75076	126.214	1.82006	126.212	1.7683	126.22	1.85895	126.218	1.88008
126.311	1.75057	126.311	1.82085	126.31	1.77896	126.317	1.85941	126.316	1.87871
126.408	1.75028	126.409	1.82141	126.408	1.78935	126.415	1.85962	126.413	1.87739
126.506	1.74993	126.507	1.82205	126.505	1.79905	126.513	1.85972	126.511	1.87602
126.604	1.74966	126.604	1.82301	126.603	1.80776	126.61	1.85964	126.609	1.87455
126.701	1.74946	126.702	1.82395	126.7	1.815	126.708	1.85949	126.706	1.87304
126.799	1.74927	126.799	1.82493	126.798	1.8203	126.805	1.85935	126.804	1.87175
126.897	1.74919	126.897	1.82626	126.896	1.82383	126.903	1.85918	126.901	1.87088
126.994	1.74906	126.995	1.82761	126.993	1.8267	127.001	1.85864	126.999	1.8703
127.092	1.74907	127.092	1.82902	127.091	1.8289	127.098	1.85806	127.097	1.86966
127.189	1.7492	127.19	1.83044	127.189	1.82937	127.196	1.85743	127.194	1.86908
127.287	1.74946	127.287	1.83216	127.286	1.82697	127.294	1.85692	127.292	1.8688
127.385	1.74988	127.385	1.83409	127.384	1.82246	127.391	1.8565	127.39	1.86835
127.482	1.75056	127.483	1.83604	127.481	1.81684	127.489	1.85603	127.487	1.86813
127.58	1.7513	127.58	1.8377	127.579	1.81279	127.586	1.8556	127.585	1.86814
127.677	1.75208	127.678	1.83964	127.677	1.81277	127.684	1.85516	127.682	1.86813
127.775	1.75278	127.775	1.84185	127.774	1.81607	127.782	1.8547	127.78	1.8684
127.873	1.75367	127.873	1.84423	127.872	1.82214	127.879	1.85434	127.878	1.86844
127.97	1.75445	127.971	1.84655	127.969	1.83086	127.977	1.85404	127.975	1.86872
128.068	1.75521	128.068	1.84875	128.067	1.84158	128.074	1.85385	128.073	1.86902
128.165	1.75599	128.166	1.85069	128.165	1.85399	128.172	1.85374	128.17	1.86929
128.263	1.75664	128.264	1.85275	128.262	1.86841	128.27	1.8538	128.268	1.86961
128.361	1.75719	128.361	1.85501	128.36	1.8844	128.367	1.85398	128.366	1.86986
128.458	1.7578	128.459	1.85722	128.458	1.9015	128.465	1.85408	128.463	1.8701
128.556	1.75819	128.556	1.85941	128.555	1.91767	128.563	1.85431	128.561	1.87035
128.654	1.7587	128.654	1.86135	128.653	1.93046	128.66	1.85452	128.659	1.87077
128.751	1.75924	128.752	1.86325	128.75	1.94076	128.758	1.85454	128.756	1.87113
128.849	1.75959	128.849	1.86472	128.848	1.94953	128.855	1.85442	128.854	1.87108
128.946	1.75999	128.947	1.86598	128.946	1.95708	128.953	1.85454	128.951	1.87088
129.044	1.76026	129.044	1.86706	129.043	1.96422	129.051	1.85457	129.049	1.87068
129.142	1.7604	129.142	1.86827	129.141	1.972	129.148	1.85456	129.147	1.87056
129.239	1.76038	129.24	1.86915	129.238	1.98084	129.246	1.85458	129.244	1.87017
129.337	1.76041	129.337	1.86973	129.336	1.99095	129.343	1.85442	129.342	1.86994
129.434	1.76029	129.435	1.87005	129.434	2.00115	129.441	1.85418	129.439	1.86967
129.532	1.76013	129.533	1.87029	129.531	2.00846	129.539	1.8538	129.537	1.86944
129.63	1.75986	129.63	1.87056	129.629	2.01075	129.636	1.85344	129.635	1.86913
129.727	1.75966	129.728	1.87064	129.726	2.01011	129.734	1.85308	129.732	1.86866
129.825	1.75946	129.825	1.87045	129.824	2.00759	129.832	1.85263	129.83	1.86857
129.922	1.75908	129.923	1.8703	129.922	2.00272	129.929	1.85199	129.928	1.86846
130.02	1.75879	130.021	1.87039	130.019	1.99547	130.027	1.85117	130.025	1.8684
130.118	1.75857	130.118	1.87034	130.117	1.98619	130.124	1.85032	130.123	1.86822
130.215	1.75841	130.216	1.87018	130.215	1.97501	130.222	1.84914	130.22	1.86814
130.313	1.75827	130.313	1.86982	130.312	1.96198	130.32	1.84788	130.318	1.86831
130.411	1.75812	130.411	1.86946	130.41	1.94852	130.417	1.84674	130.416	1.86841
130.508	1.75824	130.509	1.86911	130.507	1.9368	130.515	1.84547	130.513	1.86853
130.606	1.75846	130.606	1.86858	130.605	1.92937	130.612	1.84431	130.611	1.86869
130.703	1.75871	130.704	1.86759	130.703	1.92503	130.71	1.84314	130.708	1.86894
130.801	1.759	130.801	1.86662	130.8	1.92215	130.808	1.84205	130.806	1.86944
130.899	1.75937	130.899	1.86588	130.898	1.91983	130.905	1.84093	130.904	1.87
130.996	1.75968	130.997	1.86476	130.995	1.91765	131.003	1.83993	131.001	1.87051
131.094	1.75994	131.094	1.86357	131.093	1.91562	131.101	1.83895	131.099	1.87111
131.191	1.76038	131.192	1.86239	131.191	1.91377	131.198	1.83802	131.197	1.87181
131.289	1.76062	131.29	1.86122	131.288	1.91153	131.296	1.83725	131.294	1.87236
131.387	1.76078	131.387	1.86024	131.386	1.90944	131.393	1.83658	131.392	1.87292
131.484	1.76085	131.485	1.85907	131.484	1.90964	131.491	1.83614	131.489	1.87347
131.582	1.76097	131.582	1.85776	131.581	1.91173	131.589	1.83552	131.587	1.87404
131.679	1.76095	131.68	1.85672	131.679	1.91314	131.686	1.83508	131.685	1.87457
131.777	1.76087	131.778	1.85615	131.776	1.91302	131.784	1.83466	131.782	1.8748
131.875	1.76099	131.875	1.85555	131.874	1.91363	131.881	1.83434	131.88	1.87507
131.972	1.76094	131.973	1.85507	131.972	1.9163	131.979	1.83404	131.977	1.87538
132.07	1.76096	132.07	1.8548	132.069	1.92072	132.077	1.83372	132.075	1.87566
132.168	1.7609	132.168	1.85477	132.167	1.926	132.174	1.83358	132.173	1.87578
132.265	1.76105	132.266	1.85489	132.264	1.93194	132.272	1.83357	132.27	1.87577
132.363	1.76106	132.363	1.85517	132.362	1.93723	132.37	1.83355	132.368	1.87572
132.46	1.76091	132.461	1.85545	132.46	1.94042	132.467	1.83361	132.466	1.87557
132.558	1.76046	132.559	1.85615	132.557	1.94215	132.565	1.83372	132.563	1.87523
132.656	1.76008	132.656	1.85695	132.655	1.94496	132.662	1.83382	132.661	1.87487
132.753	1.75959	132.754	1.85777	132.752	1.95051	132.76	1.83395	132.758	1.87439
132.851	1.75906	132.851	1.85831	132.85	1.95685	132.858	1.83402	132.856	1.87387
132.948	1.75868	132.949	1.85915	132.948	1.96208	132.955	1.83413	132.954	1.87341
133.046	1.75831	133.047	1.85976	133.045	1.96549	133.053	1.83431	133.051	1.87289
133.144	1.75781	133.144	1.86021	133.143	1.9675	133.15	1.83447	133.149	1.87238
133.241	1.7573	133.242	1.86059	133.241	1.96838	133.248	1.83449	133.246	1.87187
133.339	1.75674	133.339	1.86056	133.338	1.96838	133.346	1.83448	133.344	1.8714
133.436	1.75613	133.437	1.86086	133.436	1.96681	133.443	1.83443	133.442	1.87085
133.534	1.75554	133.535	1.86079	133.533	1.96331	133.541	1.83457	133.539	1.87033
133.632	1.75507	133.632	1.86048	133.631	1.95724	133.639	1.83473	133.637	1.86986
133.729	1.75475	133.73	1.8596	133.729	1.94808	133.736	1.83497	133.735	1.86942
133.827	1.75433	133.828	1.85873	133.826	1.93585	133.834	1.8353	133.832	1.86901
133.925	1.75397	133.925	1.85748	133.924	1.92125	133.931	1.83575	133.93	1.86848
134.022	1.7534	134.023	1.85626	134.021	1.90569	134.029	1.83631	134.027	1.86805
134.12	1.7529	134.12	1.85471	134.119	1.88991	134.127	1.83679	134.125	1.86783
134.217	1.75245	134.218	1.85307	134.217	1.87431	134.224	1.83731	134.223	1.86767
134.315	1.75232	134.316	1.85135	134.314	1.85955	134.322	1.83783	134.32	1.86751
134.413	1.75237	134.413	1.84941	134.412	1.84702	134.419	1.8383	134.418	1.86756
134.51	1.75253	134.511	1.84736	134.51	1.83646	134.517	1.83863	134.515	1.86769
134.608	1.75258	134.608	1.84554	134.607	1.8264	134.615	1.83905	134.613	1.86763
134.705	1.75284	134.706	1.84377	134.705	1.81521	134.712	1.83952	134.711	1.86769
134.803	1.75315	134.804	1.8421	134.802	1.8043	134.81	1.83998	134.808	1.86758
134.901	1.75352	134.901	1.84034	134.9	1.79514	134.908	1.84037	134.906	1.86746
134.998	1.75417	134.999	1.83855	134.998	1.78722	135.005	1.84072	135.004	1.86729
135.096	1.75491	135.096	1.83698	135.095	1.78032	135.103	1.84122	135.101	1.86698
135.193	1.75561	135.194	1.83555	135.193	1.77475	135.2	1.84179	135.199	1.86669
135.291	1.75643	135.292	1.83431	135.29	1.77041	135.298	1.84237	135.296	1.86635
135.389	1.7575	135.389	1.83299	135.388	1.76576	135.396	1.84285	135.394	1.86607
135.486	1.75883	135.487	1.83201	135.486	1.76104	135.493	1.84326	135.492	1.86594
135.584	1.76026	135.585	1.83088	135.583	1.75863	135.591	1.84355	135.589	1.86572
135.682	1.7616	135.682	1.83007	135.681	1.76026	135.688	1.84358	135.687	1.86554
135.779	1.7631	135.78	1.82919	135.778	1.76532	135.786	1.84365	135.784	1.86535
135.877	1.76453	135.877	1.82847	135.876	1.77283	135.884	1.84358	135.882	1.86526
135.974	1.76609	135.975	1.82766	135.974	1.78144	135.981	1.84328	135.98	1.86518
136.072	1.76778	136.073	1.82701	136.071	1.79006	136.079	1.84293	136.077	1.86512
136.17	1.76963	136.17	1.82632	136.169	1.79739	136.177	1.84248	136.175	1.86488
136.267	1.77129	136.268	1.82544	136.267	1.8028	136.274	1.84187	136.273	1.86484
136.365	1.77276	136.365	1.82455	136.364	1.80712	136.372	1.84128	136.37	1.86457
136.462	1.7742	136.463	1.82334	136.462	1.81132	136.469	1.84074	136.468	1.86412
136.56	1.77563	136.561	1.82199	136.559	1.81481	136.567	1.84012	136.565	1.8639
136.658	1.77698	136.658	1.82046	136.657	1.81744	136.665	1.83955	136.663	1.86361
136.755	1.77817	136.756	1.81893	136.755	1.81888	136.762	1.83885	136.761	1.86353
136.853	1.77933	136.853	1.81757	136.852	1.81814	136.86	1.83823	136.858	1.86332
136.951	1.78022	136.951	1.8162	136.95	1.81596	136.957	1.83762	136.956	1.86314
137.048	1.78099	137.049	1.8147	137.047	1.8133	137.055	1.83668	137.053	1.86298
137.146	1.78171	137.146	1.81309	137.145	1.81061	137.153	1.83566	137.151	1.86302
137.243	1.78242	137.244	1.81149	137.243	1.80789	137.25	1.83453	137.249	1.86282
137.341	1.78289	137.342	1.80997	137.34	1.80568	137.348	1.83334	137.346	1.86238
137.439	1.78303	137.439	1.80841	137.438	1.80353	137.446	1.83195	137.444	1.8618
137.536	1.78296	137.537	1.80706	137.536	1.80048	137.543	1.83053	137.542	1.86123
137.634	1.78285	137.634	1.80569	137.633	1.79672	137.641	1.82925	137.639	1.86065
137.731	1.78269	137.732	1.80456	137.731	1.79275	137.738	1.82772	137.737	1.85999
137.829	1.7825	137.83	1.80333	137.828	1.78924	137.836	1.82607	137.834	1.85927
137.927	1.78233	137.927	1.8022	137.926	1.78632	137.934	1.82461	137.932	1.8585
138.024	1.78198	138.025	1.80118	138.024	1.78412	138.031	1.82332	138.03	1.85784
138.122	1.78133	138.122	1.80036	138.121	1.78293	138.129	1.82206	138.127	1.85712
138.219	1.78072	138.22	1.7998	138.219	1.78365	138.226	1.82089	138.225	1.85617
138.317	1.78035	138.318	1.79944	138.316	1.78635	138.324	1.81975	138.322	1.85544
138.415	1.78017	138.415	1.79955	138.414	1.78959	138.422	1.81881	138.42	1.85477
138.512	1.78014	138.513	1.79979	138.512	1.79349	138.519	1.81781	138.518	1.85405
138.61	1.78002	138.611	1.80038	138.609	1.79774	138.617	1.81681	138.615	1.85343
138.708	1.78001	138.708	1.80101	138.707	1.80163	138.715	1.8161	138.713	1.85268
138.805	1.77996	138.806	1.80169	138.804	1.8057	138.812	1.81538	138.811	1.85196
138.903	1.78008	138.903	1.80265	138.902	1.81039	138.91	1.81451	138.908	1.85123
139	1.78033	139.001	1.80373	139	1.81519	139.007	1.81371	139.006	1.85038
139.098	1.78085	139.099	1.80484	139.097	1.81954	139.105	1.81296	139.103	1.84934
139.196	1.78129	139.196	1.80595	139.195	1.82261	139.203	1.81233	139.201	1.84853
139.293	1.78179	139.294	1.80689	139.293	1.82333	139.3	1.81168	139.299	1.84789
139.391	1.78233	139.391	1.80798	139.39	1.82292	139.398	1.81111	139.396	1.84735
139.488	1.7829	139.489	1.80905	139.488	1.82234	139.496	1.81052	139.494	1.84707
139.586	1.78352	139.587	1.80994	139.585	1.82138	139.593	1.80976	139.591	1.84671
139.684	1.784	139.684	1.81068	139.683	1.82018	139.691	1.80899	139.689	1.84628
139.781	1.78454	139.782	1.81134	139.781	1.81801	139.788	1.80841	139.787	1.84595
139.879	1.78485	139.88	1.81194	139.878	1.81503	139.886	1.80775	139.884	1.84566
139.976	1.78527	139.977	1.81219	139.976	1.81223	139.984	1.80702	139.982	1.84534
140.074	1.78574	140.075	1.81241	140.073	1.80971	140.081	1.80627	140.08	1.84531
140.172	1.78622	140.172	1.81269	140.171	1.80655	140.179	1.80549	140.177	1.84553
140.269	1.78655	140.27	1.81297	140.269	1.80204	140.276	1.80471	140.275	1.84567
140.367	1.78677	140.368	1.81302	140.366	1.79689	140.374	1.80366	140.372	1.8459
140.465	1.787	140.465	1.813	140.464	1.79095	140.472	1.80279	140.47	1.8461
140.562	1.78755	140.563	1.81274	140.562	1.78514	140.569	1.80188	140.568	1.84635
140.66	1.7882	140.66	1.81274	140.659	1.78019	140.667	1.80082	140.665	1.84678
140.757	1.78901	140.758	1.81283	140.757	1.77663	140.765	1.79968	140.763	1.84741
140.855	1.78982	140.856	1.81272	140.854	1.77358	140.862	1.79867	140.86	1.8481
140.953	1.79064	140.953	1.81269	140.952	1.76959	140.96	1.79789	140.958	1.84893
141.05	1.79127	141.051	1.81285	141.05	1.76491	141.057	1.79709	141.056	1.84986
141.148	1.79213	141.148	1.81299	141.147	1.76137	141.155	1.79623	141.153	1.85068
141.245	1.79299	141.246	1.81325	141.245	1.76013	141.253	1.79538	141.251	1.85165
141.343	1.79402	141.344	1.81334	141.342	1.76043	141.35	1.79465	141.349	1.85264
141.441	1.79505	141.441	1.81352	141.44	1.76216	141.448	1.79383	141.446	1.85352
141.538	1.79591	141.539	1.81394	141.538	1.76515	141.545	1.79327	141.544	1.85443
141.636	1.79682	141.637	1.81416	141.635	1.76839	141.643	1.79297	141.641	1.85542
141.733	1.79776	141.734	1.81442	141.733	1.77115	141.741	1.79279	141.739	1.85618
141.831	1.79884	141.832	1.81494	141.831	1.77298	141.838	1.79276	141.837	1.85705
141.929	1.79985	141.929	1.81593	141.928	1.77398	141.936	1.79263	141.934	1.8579
142.026	1.80096	142.027	1.81697	142.026	1.77496	142.034	1.79245	142.032	1.85848
142.124	1.80199	142.125	1.81794	142.123	1.77577	142.131	1.79228	142.129	1.85903
142.222	1.80301	142.222	1.8189	142.221	1.7764	142.229	1.79237	142.227	1.85955
142.319	1.80391	142.32	1.81993	142.319	1.77603	142.326	1.79257	142.325	1.86008
142.417	1.8048	142.417	1.8212	142.416	1.77471	142.424	1.79278	142.422	1.86049
142.514	1.80566	142.515	1.82256	142.514	1.7721	142.522	1.7931	142.52	1.8609
142.612	1.8066	142.613	1.82379	142.611	1.76912	142.619	1.79339	142.618	1.86121
142.71	1.80726	142.71	1.82499	142.709	1.76571	142.717	1.79373	142.715	1.86164
142.807	1.8079	142.808	1.82633	142.807	1.76277	142.814	1.794	142.813	1.86195
142.905	1.80843	142.906	1.82752	142.904	1.7612	142.912	1.79419	142.91	1.86216
143.002	1.8089	143.003	1.82858	143.002	1.75987	143.01	1.79464	143.008	1.86248
143.1	1.80931	143.101	1.82968	143.099	1.7579	143.107	1.7952	143.106	1.86279
143.198	1.80975	143.198	1.83079	143.197	1.75567	143.205	1.7956	143.203	1.86303
143.295	1.81013	143.296	1.83193	143.295	1.75462	143.303	1.79602	143.301	1.86296
143.393	1.81043	143.394	1.83306	143.392	1.75521	143.4	1.79652	143.399	1.86289
143.49	1.81067	143.491	1.83393	143.49	1.75769	143.498	1.79679	143.496	1.86276
143.588	1.81075	143.589	1.835	143.588	1.76052	143.595	1.79697	143.594	1.86294
143.686	1.81086	143.686	1.83613	143.685	1.76402	143.693	1.79698	143.691	1.86324
143.783	1.81094	143.784	1.83699	143.783	1.76908	143.791	1.7969	143.789	1.86334
143.881	1.8112	143.882	1.83762	143.88	1.77482	143.888	1.79689	143.887	1.86343
143.979	1.81148	143.979	1.83815	143.978	1.7807	143.986	1.79676	143.984	1.86359
144.076	1.81159	144.077	1.83852	144.076	1.78701	144.083	1.79662	144.082	1.86375
144.174	1.8117	144.174	1.83899	144.173	1.79319	144.181	1.79623	144.179	1.86397
144.271	1.8118	144.272	1.83926	144.271	1.79898	144.279	1.79574	144.277	1.86442
144.369	1.81187	144.37	1.83888	144.368	1.80367	144.376	1.79527	144.375	1.86496
144.467	1.81172	144.467	1.83865	144.466	1.80746	144.474	1.79455	144.472	1.86544
144.564	1.81159	144.565	1.83825	144.564	1.81119	144.572	1.7938	144.57	1.86565
144.662	1.81161	144.663	1.83772	144.661	1.81551	144.669	1.79286	144.668	1.86562
144.759	1.81146	144.76	1.83692	144.759	1.81966	144.767	1.79198	144.765	1.86578
144.857	1.81123	144.858	1.83604	144.857	1.82366	144.864	1.79113	144.863	1.86602
144.955	1.81105	144.955	1.83514	144.954	1.82851	144.962	1.79009	144.96	1.86625
145.052	1.81082	145.053	1.83437	145.052	1.83538	145.06	1.78904	145.058	1.86666
145.15	1.81038	145.151	1.83349	145.149	1.84477	145.157	1.78835	145.156	1.86708
145.247	1.80999	145.248	1.83272	145.247	1.85526	145.255	1.7876	145.253	1.86768
145.345	1.80957	145.346	1.83193	145.345	1.86604	145.352	1.78691	145.351	1.86841
145.443	1.80936	145.443	1.83122	145.442	1.8755	145.45	1.7864	145.448	1.86942
145.54	1.80921	145.541	1.83054	145.54	1.88393	145.548	1.78601	145.546	1.87034
145.638	1.809	145.639	1.82966	145.637	1.89044	145.645	1.7858	145.644	1.87146
145.736	1.80894	145.736	1.82881	145.735	1.8948	145.743	1.78543	145.741	1.87264
145.833	1.80876	145.834	1.8278	145.833	1.89921	145.841	1.7851	145.839	1.87377
145.931	1.80837	145.932	1.82662	145.93	1.9053	145.938	1.78503	145.937	1.8749
146.028	1.80807	146.029	1.82542	146.028	1.91216	146.036	1.78488	146.034	1.87577
146.126	1.80792	146.127	1.82391	146.125	1.91857	146.133	1.78463	146.132	1.87669
146.224	1.80789	146.224	1.82252	146.223	1.92449	146.231	1.78461	146.229	1.87735
146.321	1.80787	146.322	1.82176	146.321	1.93013	146.329	1.78464	146.327	1.87783
146.419	1.80795	146.42	1.82072	146.418	1.93624	146.426	1.78486	146.425	1.87833
146.516	1.80774	146.517	1.81979	146.516	1.94307	146.524	1.78512	146.522	1.87901
146.614	1.80755	146.615	1.8189	146.614	1.95079	146.621	1.78555	146.62	1.87959
146.712	1.80749	146.712	1.81813	146.711	1.9588	146.719	1.78618	146.717	1.88005
146.809	1.80745	146.81	1.8177	146.809	1.96547	146.817	1.78662	146.815	1.88054
146.907	1.80749	146.908	1.81744	146.906	1.96919	146.914	1.78705	146.913	1.88085
147.005	1.80762	147.005	1.81689	147.004	1.96836	147.012	1.78752	147.01	1.88114
147.102	1.80787	147.103	1.81638	147.102	1.96363	147.11	1.78793	147.108	1.88116
147.2	1.8081	147.2	1.81576	147.199	1.95759	147.207	1.78833	147.206	1.88129
147.297	1.80823	147.298	1.81504	147.297	1.95207	147.305	1.78863	147.303	1.88121
147.395	1.80827	147.396	1.8144	147.394	1.94724	147.402	1.78892	147.401	1.88093
147.493	1.80844	147.493	1.81387	147.492	1.94282	147.5	1.78904	147.498	1.88046
147.59	1.80855	147.591	1.81369	147.59	1.93884	147.598	1.78899	147.596	1.87978
147.688	1.80851	147.689	1.8137	147.687	1.93511	147.695	1.78904	147.694	1.87917
147.785	1.80847	147.786	1.81391	147.785	1.92999	147.793	1.78923	147.791	1.87847
147.883	1.8086	147.884	1.81434	147.883	1.92236	147.89	1.7893	147.889	1.87775
147.981	1.80885	147.981	1.81499	147.98	1.91407	147.988	1.7895	147.986	1.87711
148.078	1.80899	148.079	1.81581	148.078	1.90706	148.086	1.78978	148.084	1.87641
148.176	1.80911	148.177	1.81679	148.175	1.90163	148.183	1.78996	148.182	1.87578
148.273	1.80943	148.274	1.81742	148.273	1.89708	148.281	1.79003	148.279	1.87533
148.371	1.80983	148.372	1.81811	148.371	1.89347	148.379	1.78999	148.377	1.87479
148.469	1.81042	148.469	1.81854	148.468	1.88928	148.476	1.79	148.475	1.87418
148.566	1.81103	148.567	1.8189	148.566	1.88312	148.574	1.79011	148.572	1.87383
148.664	1.81151	148.665	1.81925	148.663	1.87626	148.671	1.79007	148.67	1.87348
148.762	1.8121	148.762	1.81935	148.761	1.87119	148.769	1.79018	148.767	1.87335
148.859	1.81248	148.86	1.81916	148.859	1.87005	148.867	1.7903	148.865	1.87325
148.957	1.81266	148.958	1.81912	148.956	1.87413	148.964	1.79042	148.963	1.87311
149.054	1.81284	149.055	1.819	149.054	1.8816	149.062	1.79055	149.06	1.87323
149.152	1.81291	149.153	1.8189	149.152	1.88946	149.159	1.79078	149.158	1.87307
149.25	1.81311	149.25	1.81878	149.249	1.89543	149.257	1.79108	149.255	1.87294
149.347	1.81315	149.348	1.81856	149.347	1.90055	149.355	1.79152	149.353	1.87277
149.445	1.8131	149.446	1.81834	149.444	1.90741	149.452	1.79207	149.451	1.87273
149.542	1.8131	149.543	1.81794	149.542	1.9182	149.55	1.7926	149.548	1.87279
149.64	1.81301	149.641	1.81735	149.64	1.93243	149.648	1.79317	149.646	1.8728
149.738	1.81275	149.738	1.8166	149.737	1.9485	149.745	1.7936	149.744	1.87271
149.835	1.81253	149.836	1.81595	149.835	1.96449	149.843	1.7942	149.841	1.87279
149.933	1.81218	149.934	1.81502	149.932	1.97896	149.94	1.79472	149.939	1.87295
150.03	1.81167	150.031	1.81403	150.03	1.99186	150.038	1.79511	150.036	1.87314
150.128	1.81102	150.129	1.81291	150.128	2.00411	150.136	1.79558	150.134	1.87342
150.226	1.80987	150.227	1.81203	150.225	2.01819	150.233	1.79601	150.232	1.87383
150.323	1.80858	150.324	1.81145	150.323	2.03287	150.331	1.79651	150.329	1.87442
150.421	1.80716	150.422	1.8111	150.42	2.04678	150.428	1.79708	150.427	1.87519
150.519	1.80547	150.519	1.81064	150.518	2.05986	150.526	1.79765	150.524	1.87581
150.616	1.80385	150.617	1.81037	150.616	2.07338	150.624	1.79823	150.622	1.87655
150.714	1.80211	150.715	1.81012	150.713	2.08853	150.721	1.79883	150.72	1.87727
150.811	1.80046	150.812	1.81005	150.811	2.10436	150.819	1.79943	150.817	1.87804
150.909	1.79885	150.91	1.81007	150.909	2.11893	150.917	1.8001	150.915	1.87893
151.007	1.79735	151.007	1.81027	151.006	2.13201	151.014	1.80103	151.013	1.87987
151.104	1.79598	151.105	1.81053	151.104	2.1422	151.112	1.80193	151.11	1.88091
151.202	1.79468	151.203	1.81097	151.201	2.14853	151.209	1.80299	151.208	1.88196
151.299	1.7936	151.3	1.81138	151.299	2.15192	151.307	1.80395	151.305	1.88309
151.397	1.79269	151.398	1.81177	151.397	2.15369	151.405	1.80478	151.403	1.88406
151.495	1.79199	151.495	1.81234	151.494	2.15311	151.502	1.80587	151.501	1.88504
151.592	1.79148	151.593	1.81285	151.592	2.14929	151.6	1.80709	151.598	1.88597
151.69	1.79133	151.691	1.81347	151.689	2.14192	151.697	1.80844	151.696	1.88697
151.787	1.79105	151.788	1.81386	151.787	2.13287	151.795	1.8097	151.793	1.88772
151.885	1.79089	151.886	1.81446	151.885	2.12413	151.893	1.81102	151.891	1.88842
151.983	1.79069	151.984	1.81524	151.982	2.11585	151.99	1.81251	151.989	1.88905
152.08	1.79038	152.081	1.81615	152.08	2.10851	152.088	1.81392	152.086	1.88959
152.178	1.79024	152.179	1.81691	152.178	2.10052	152.186	1.81536	152.184	1.89009
152.276	1.79003	152.276	1.81737	152.275	2.09126	152.283	1.81667	152.282	1.89025
152.373	1.78967	152.374	1.81771	152.373	2.08089	152.381	1.81797	152.379	1.89026
152.471	1.78931	152.472	1.81814	152.47	2.07043	152.478	1.8191	152.477	1.89018
152.568	1.7889	152.569	1.8185	152.568	2.0593	152.576	1.82018	152.574	1.88984
152.666	1.78839	152.667	1.81899	152.666	2.04675	152.674	1.82106	152.672	1.88934
152.764	1.78795	152.764	1.81957	152.763	2.03379	152.771	1.82191	152.77	1.88877
152.861	1.78746	152.862	1.8201	152.861	2.02093	152.869	1.82267	152.867	1.88799
152.959	1.78689	152.96	1.82058	152.958	2.00877	152.967	1.8231	152.965	1.88693
153.056	1.78648	153.057	1.82084	153.056	1.99994	153.064	1.82346	153.062	1.88583
153.154	1.78616	153.155	1.82127	153.154	1.99632	153.162	1.82393	153.16	1.88463
153.252	1.78581	153.253	1.82171	153.251	1.99722	153.259	1.82446	153.258	1.88354
153.349	1.78527	153.35	1.82209	153.349	2.00005	153.357	1.82498	153.355	1.88238
153.447	1.78454	153.448	1.82229	153.446	2.00364	153.455	1.82523	153.453	1.8811
153.544	1.78367	153.545	1.82226	153.544	2.00795	153.552	1.82538	153.551	1.87988
153.642	1.78263	153.643	1.82219	153.642	2.0135	153.65	1.82557	153.648	1.87881
153.74	1.7816	153.741	1.82212	153.739	2.01893	153.747	1.82577	153.746	1.87776
153.837	1.78059	153.838	1.82187	153.837	2.02313	153.845	1.82587	153.843	1.87674
153.935	1.77978	153.936	1.82145	153.935	2.0255	153.943	1.82602	153.941	1.87595
154.033	1.77921	154.033	1.82106	154.032	2.02436	154.04	1.82608	154.039	1.87521
154.13	1.77852	154.131	1.8205	154.13	2.02027	154.138	1.82606	154.136	1.87425
154.228	1.77792	154.229	1.82008	154.227	2.01407	154.236	1.82628	154.234	1.87349
154.325	1.77743	154.326	1.81961	154.325	2.00712	154.333	1.82654	154.331	1.87273
154.423	1.77707	154.424	1.81932	154.423	1.99924	154.431	1.82697	154.429	1.8719
154.521	1.77688	154.521	1.81927	154.52	1.9904	154.528	1.82745	154.527	1.87113
154.618	1.77688	154.619	1.81908	154.618	1.98084	154.626	1.82802	154.624	1.87027
154.716	1.77691	154.717	1.81877	154.715	1.9705	154.724	1.82873	154.722	1.86953
154.813	1.77703	154.814	1.81822	154.813	1.95944	154.821	1.82942	154.82	1.86891
154.911	1.77718	154.912	1.81748	154.911	1.94731	154.919	1.83003	154.917	1.86837
155.009	1.77693	155.01	1.81661	155.008	1.93353	155.016	1.83076	155.015	1.86782
155.106	1.77663	155.107	1.81536	155.106	1.91808	155.114	1.83119	155.112	1.86747
155.204	1.77635	155.205	1.81422	155.204	1.901	155.212	1.83137	155.21	1.86683
155.301	1.77615	155.302	1.81302	155.301	1.88239	155.309	1.83162	155.308	1.86628
155.399	1.77591	155.4	1.81157	155.399	1.86369	155.407	1.83185	155.405	1.86597
155.497	1.77565	155.498	1.81022	155.496	1.84613	155.505	1.83212	155.503	1.86574
155.594	1.77524	155.595	1.80894	155.594	1.82968	155.602	1.83227	155.6	1.86548
155.692	1.77473	155.693	1.80764	155.692	1.81494	155.7	1.83229	155.698	1.86517
155.79	1.77409	155.79	1.8065	155.789	1.80332	155.797	1.83239	155.796	1.86475
155.887	1.77319	155.888	1.80536	155.887	1.79676	155.895	1.83234	155.893	1.86396
155.985	1.77222	155.986	1.80435	155.984	1.79497	155.993	1.83236	155.991	1.86308
156.082	1.77141	156.083	1.80355	156.082	1.79592	156.09	1.83246	156.089	1.86221
156.18	1.77051	156.181	1.80249	156.18	1.79901	156.188	1.83245	156.186	1.8616
156.278	1.7697	156.279	1.80171	156.277	1.80432	156.285	1.83215	156.284	1.86114
156.375	1.76907	156.376	1.80096	156.375	1.811	156.383	1.83171	156.381	1.86085
156.473	1.76819	156.474	1.79998	156.473	1.8188	156.481	1.83127	156.479	1.86051
156.57	1.76735	156.571	1.79896	156.57	1.82628	156.578	1.83093	156.577	1.86018
156.668	1.76656	156.669	1.79798	156.668	1.8327	156.676	1.83059	156.674	1.8597
156.766	1.76577	156.767	1.79732	156.765	1.83755	156.774	1.83023	156.772	1.85924
156.863	1.76511	156.864	1.79714	156.863	1.84042	156.871	1.83005	156.869	1.85901
156.961	1.76466	156.962	1.79719	156.961	1.84235	156.969	1.82977	156.967	1.85894
157.059	1.76408	157.059	1.79732	157.058	1.84517	157.066	1.8296	157.065	1.85885
157.156	1.76356	157.157	1.79724	157.156	1.84985	157.164	1.82967	157.162	1.85861
157.254	1.7629	157.255	1.79729	157.253	1.85696	157.262	1.82984	157.26	1.8584
157.351	1.76218	157.352	1.79762	157.351	1.86562	157.359	1.83024	157.358	1.85784
157.449	1.76158	157.45	1.79811	157.449	1.87311	157.457	1.83047	157.455	1.85719
157.547	1.76101	157.547	1.79872	157.546	1.87994	157.554	1.8306	157.553	1.85645
157.644	1.76037	157.645	1.79946	157.644	1.88583	157.652	1.83088	157.65	1.85586
157.742	1.75971	157.743	1.80032	157.741	1.89132	157.75	1.83101	157.748	1.8553
157.839	1.75928	157.84	1.80099	157.839	1.89648	157.847	1.83116	157.846	1.85462
157.937	1.75892	157.938	1.80136	157.937	1.90238	157.945	1.83141	157.943	1.85386
158.035	1.75856	158.036	1.80178	158.034	1.90977	158.043	1.83171	158.041	1.85324
158.132	1.75829	158.133	1.80271	158.132	1.91864	158.14	1.83192	158.138	1.85231
158.23	1.75819	158.231	1.80368	158.23	1.92765	158.238	1.83228	158.236	1.85132
158.327	1.75796	158.328	1.80442	158.327	1.93675	158.335	1.83249	158.334	1.85031
158.425	1.7579	158.426	1.80517	158.425	1.94675	158.433	1.83267	158.431	1.84944
158.523	1.75785	158.524	1.8059	158.522	1.95805	158.531	1.83285	158.529	1.84863
158.62	1.75781	158.621	1.80674	158.62	1.97007	158.628	1.8328	158.627	1.84789
158.718	1.75771	158.719	1.8074	158.718	1.98134	158.726	1.83286	158.724	1.84727
158.816	1.75737	158.816	1.80786	158.815	1.99089	158.823	1.83294	158.822	1.8465
158.913	1.75696	158.914	1.80829	158.913	1.99774	158.921	1.8329	158.919	1.84566
159.011	1.75669	159.012	1.80887	159.01	2.00051	159.019	1.83279	159.017	1.84466
159.108	1.75636	159.109	1.80954	159.108	1.99845	159.116	1.83266	159.115	1.84405
159.206	1.75601	159.207	1.81	159.206	1.99166	159.214	1.83235	159.212	1.84345
159.304	1.75581	159.305	1.81041	159.303	1.98088	159.312	1.83195	159.31	1.84306
159.401	1.75559	159.402	1.81074	159.401	1.96942	159.409	1.83175	159.407	1.84257
159.499	1.7555	159.5	1.81086	159.499	1.95807	159.507	1.83153	159.505	1.84215
159.596	1.75556	159.597	1.81083	159.596	1.94762	159.604	1.83125	159.603	1.8417
159.694	1.75578	159.695	1.81061	159.694	1.93683	159.702	1.83098	159.7	1.84134
159.792	1.75609	159.793	1.81051	159.791	1.92399	159.8	1.83063	159.798	1.84131
159.889	1.75651	159.89	1.8105	159.889	1.90969	159.897	1.83018	159.896	1.84147
159.987	1.75699	159.988	1.81053	159.987	1.89562	159.995	1.82965	159.993	1.84165
160.084	1.75749	160.085	1.81029	160.084	1.88274	160.092	1.82919	160.091	1.84172
160.182	1.75804	160.183	1.80994	160.182	1.87156	160.19	1.82885	160.188	1.84167
160.28	1.75846	160.281	1.8099	160.279	1.86195	160.288	1.82882	160.286	1.84176
160.377	1.75886	160.378	1.80989	160.377	1.85136	160.385	1.82868	160.384	1.84201
160.475	1.75918	160.476	1.81001	160.475	1.83943	160.483	1.82855	160.481	1.84246
160.573	1.75962	160.573	1.8102	160.572	1.82725	160.581	1.82853	160.579	1.84293
160.67	1.7603	160.671	1.81061	160.67	1.81739	160.678	1.82852	160.676	1.84303
160.768	1.76093	160.769	1.81096	160.767	1.81183	160.776	1.8286	160.774	1.84317
160.865	1.76143	160.866	1.81135	160.865	1.80961	160.873	1.82888	160.872	1.84309
160.963	1.76179	160.964	1.81136	160.963	1.80891	160.971	1.82927	160.969	1.84317
161.061	1.76211	161.062	1.81148	161.06	1.80902	161.069	1.82959	161.067	1.84338
161.158	1.76241	161.159	1.81171	161.158	1.80973	161.166	1.82997	161.165	1.84358
161.256	1.76262	161.257	1.81191	161.256	1.81041	161.264	1.83028	161.262	1.84378
161.353	1.76284	161.354	1.81222	161.353	1.81086	161.361	1.83061	161.36	1.84397
161.451	1.76288	161.452	1.81277	161.451	1.81117	161.459	1.83109	161.457	1.84395
161.549	1.76275	161.55	1.81339	161.548	1.81131	161.557	1.83167	161.555	1.84393
161.646	1.76233	161.647	1.8139	161.646	1.81143	161.654	1.83239	161.653	1.84414
161.744	1.76181	161.745	1.81454	161.744	1.81313	161.752	1.83329	161.75	1.84427
161.841	1.7612	161.842	1.81527	161.841	1.81712	161.85	1.83425	161.848	1.8445
161.939	1.7606	161.94	1.81643	161.939	1.8228	161.947	1.83534	161.945	1.84463
162.037	1.75992	162.038	1.81773	162.036	1.82814	162.045	1.83649	162.043	1.84479
162.134	1.7591	162.135	1.81902	162.134	1.83324	162.142	1.83764	162.141	1.84525
162.232	1.75861	162.233	1.82003	162.232	1.83918	162.24	1.83857	162.238	1.84552
162.33	1.75811	162.331	1.82099	162.329	1.84609	162.338	1.83948	162.336	1.84554
162.427	1.75786	162.428	1.82176	162.427	1.85371	162.435	1.84041	162.434	1.84545
162.525	1.7574	162.526	1.82223	162.525	1.8615	162.533	1.84128	162.531	1.84529
162.622	1.75692	162.623	1.82264	162.622	1.87018	162.63	1.84202	162.629	1.84519
162.72	1.75674	162.721	1.82308	162.72	1.87898	162.728	1.84243	162.726	1.84517
162.818	1.75676	162.819	1.8234	162.817	1.888	162.826	1.84269	162.824	1.84538
162.915	1.75707	162.916	1.82359	162.915	1.89853	162.923	1.84283	162.922	1.84554
163.013	1.75753	163.014	1.82357	163.013	1.91107	163.021	1.843	163.019	1.84563
163.11	1.75809	163.111	1.82325	163.11	1.92419	163.119	1.84314	163.117	1.84575
163.208	1.75876	163.209	1.82309	163.208	1.93763	163.216	1.84327	163.215	1.84582
163.306	1.75952	163.307	1.82291	163.305	1.95176	163.314	1.84345	163.312	1.8461
163.403	1.76043	163.404	1.82253	163.403	1.96606	163.411	1.84352	163.41	1.84661
163.501	1.76163	163.502	1.82213	163.501	1.97974	163.509	1.84349	163.507	1.84715
163.598	1.76297	163.6	1.82171	163.598	1.99098	163.607	1.84319	163.605	1.84751
163.696	1.76451	163.697	1.82121	163.696	1.99846	163.704	1.84294	163.703	1.84794
163.794	1.76601	163.795	1.8207	163.794	2.00107	163.802	1.84249	163.8	1.84821
163.891	1.76728	163.892	1.81987	163.891	1.99867	163.899	1.84195	163.898	1.84858
163.989	1.76866	163.99	1.8189	163.989	1.99382	163.997	1.84124	163.995	1.849
164.087	1.77001	164.088	1.81827	164.086	1.98955	164.095	1.84041	164.093	1.84907
164.184	1.77108	164.185	1.81776	164.184	1.98601	164.192	1.83963	164.191	1.84934
164.282	1.77213	164.283	1.81717	164.282	1.98313	164.29	1.83889	164.288	1.84984
164.379	1.77313	164.38	1.81689	164.379	1.98099	164.388	1.83804	164.386	1.85019
164.477	1.77425	164.478	1.81682	164.477	1.97888	164.485	1.83725	164.484	1.85073
164.575	1.77536	164.576	1.81668	164.574	1.97519	164.583	1.83653	164.581	1.85167
164.672	1.77633	164.673	1.81638	164.672	1.97064	164.68	1.836	164.679	1.85249
164.77	1.77722	164.771	1.81609	164.77	1.96637	164.778	1.83555	164.776	1.85319
164.867	1.77794	164.868	1.81605	164.867	1.96217	164.876	1.83527	164.874	1.85376
164.965	1.77835	164.966	1.8163	164.965	1.9573	164.973	1.83492	164.972	1.8542
165.063	1.77881	165.064	1.81653	165.062	1.95176	165.071	1.83459	165.069	1.85467
165.16	1.77919	165.161	1.81665	165.16	1.94531	165.168	1.83434	165.167	1.85507
165.258	1.77942	165.259	1.81673	165.258	1.9386	165.266	1.83399	165.264	1.85541
165.355	1.77932	165.357	1.81664	165.355	1.93267	165.364	1.83369	165.362	1.85576
165.453	1.77905	165.454	1.81655	165.453	1.92858	165.461	1.83358	165.46	1.85599
165.551	1.77881	165.552	1.81656	165.551	1.92781	165.559	1.83375	165.557	1.85594
165.648	1.77804	165.649	1.81657	165.648	1.93144	165.657	1.83378	165.655	1.85574
165.746	1.77728	165.747	1.81639	165.746	1.94033	165.754	1.83402	165.753	1.85548
165.844	1.77672	165.845	1.81616	165.843	1.95523	165.852	1.83417	165.85	1.8553
165.941	1.77617	165.942	1.81572	165.941	1.97382	165.949	1.83454	165.948	1.85513
166.039	1.7755	166.04	1.81503	166.039	1.99237	166.047	1.83501	166.045	1.85499
166.136	1.77485	166.137	1.81429	166.136	2.00981	166.145	1.83574	166.143	1.85467
166.234	1.77426	166.235	1.81383	166.234	2.02535	166.242	1.83664	166.241	1.85407
166.332	1.77353	166.333	1.81331	166.331	2.03756	166.34	1.83773	166.338	1.85351
166.429	1.77257	166.43	1.81274	166.429	2.04718	166.437	1.83867	166.436	1.85267
166.527	1.77122	166.528	1.81212	166.527	2.05542	166.535	1.83958	166.533	1.85177
166.624	1.77004	166.626	1.81154	166.624	2.06189	166.633	1.84064	166.631	1.8509
166.722	1.76885	166.723	1.81139	166.722	2.06528	166.73	1.84176	166.729	1.85019
166.82	1.76755	166.821	1.81126	166.82	2.06466	166.828	1.84281	166.826	1.84959
166.917	1.76651	166.918	1.81112	166.917	2.06207	166.926	1.84374	166.924	1.84914
167.015	1.76533	167.016	1.81129	167.015	2.06002	167.023	1.84475	167.022	1.84861
167.112	1.76415	167.114	1.81131	167.112	2.05912	167.121	1.84559	167.119	1.8483
167.21	1.76304	167.211	1.81126	167.21	2.05844	167.218	1.84636	167.217	1.84788
167.308	1.76238	167.309	1.81122	167.308	2.05817	167.316	1.8471	167.314	1.84749
167.405	1.76185	167.406	1.81131	167.405	2.05833	167.414	1.8477	167.412	1.84736
167.503	1.76138	167.504	1.8117	167.503	2.05909	167.511	1.84823	167.51	1.84721
167.601	1.76122	167.602	1.81215	167.6	2.05999	167.609	1.84872	167.607	1.84711
167.698	1.761	167.699	1.81242	167.698	2.06026	167.706	1.84909	167.705	1.847
167.796	1.76075	167.797	1.81258	167.796	2.05887	167.804	1.84957	167.802	1.84673
167.893	1.76033	167.894	1.813	167.893	2.05548	167.902	1.85005	167.9	1.84635
167.991	1.76002	167.992	1.81328	167.991	2.0492	167.999	1.85052	167.998	1.84606
168.089	1.75982	168.09	1.8137	168.088	2.04002	168.097	1.85072	168.095	1.84581
168.186	1.75951	168.187	1.81382	168.186	2.02972	168.195	1.85062	168.193	1.84585
168.284	1.75904	168.285	1.81394	168.284	2.01972	168.292	1.85027	168.291	1.84587
168.381	1.75874	168.383	1.81405	168.381	2.01015	168.39	1.85007	168.388	1.84576
168.479	1.75867	168.48	1.8141	168.479	2.00164	168.487	1.84995	168.486	1.84563
168.577	1.7586	168.578	1.81429	168.577	1.99554	168.585	1.84972	168.583	1.84556
168.674	1.75842	168.675	1.81419	168.674	1.99195	168.683	1.84949	168.681	1.84535
168.772	1.75836	168.773	1.8143	168.772	1.99139	168.78	1.84933	168.779	1.84524
168.869	1.75835	168.871	1.81435	168.869	1.99192	168.878	1.84922	168.876	1.84486
168.967	1.75841	168.968	1.81446	168.967	1.9923	168.975	1.84898	168.974	1.84468
169.065	1.75853	169.066	1.81458	169.065	1.99251	169.073	1.84899	169.071	1.84442
169.162	1.75853	169.163	1.81489	169.162	1.9929	169.171	1.84915	169.169	1.84432
169.26	1.75833	169.261	1.81545	169.26	1.99289	169.268	1.84937	169.267	1.84407
169.358	1.7579	169.359	1.81615	169.357	1.99175	169.366	1.84956	169.364	1.84386
169.455	1.75755	169.456	1.81657	169.455	1.9884	169.464	1.84984	169.462	1.84385
169.553	1.75716	169.554	1.81699	169.553	1.9813	169.561	1.85008	169.56	1.8438
169.65	1.75692	169.652	1.81745	169.65	1.97157	169.659	1.85033	169.657	1.84392
169.748	1.75667	169.749	1.81776	169.748	1.95969	169.756	1.85051	169.755	1.84401
169.846	1.75645	169.847	1.81787	169.846	1.94762	169.854	1.85064	169.852	1.84431
169.943	1.75629	169.944	1.81789	169.943	1.93742	169.952	1.85072	169.95	1.84451
170.041	1.75611	170.042	1.81789	170.041	1.92997	170.049	1.85086	170.048	1.84469
170.138	1.75614	170.14	1.81793	170.138	1.9258	170.147	1.85107	170.145	1.84466
170.236	1.75637	170.237	1.81774	170.236	1.92577	170.245	1.85141	170.243	1.84475
170.334	1.75653	170.335	1.81719	170.334	1.92991	170.342	1.85173	170.34	1.84524
170.431	1.75653	170.432	1.81651	170.431	1.93639	170.44	1.85188	170.438	1.84552
170.529	1.75648	170.53	1.81568	170.529	1.94269	170.537	1.85206	170.536	1.84574
170.627	1.75651	170.628	1.81507	170.626	1.94762	170.635	1.85219	170.633	1.84616
170.724	1.75657	170.725	1.81448	170.724	1.95175	170.733	1.8523	170.731	1.84651
170.822	1.75651	170.823	1.8138	170.822	1.95584	170.83	1.85241	170.829	1.84708
170.919	1.75644	170.92	1.81322	170.919	1.96045	170.928	1.85249	170.926	1.84767
171.017	1.75632	171.018	1.81262	171.017	1.96592	171.025	1.85243	171.024	1.84819
171.115	1.75624	171.116	1.812	171.115	1.97068	171.123	1.85231	171.121	1.84852
171.212	1.75629	171.213	1.8113	171.212	1.97367	171.221	1.8523	171.219	1.84891
171.31	1.75661	171.311	1.81084	171.31	1.97472	171.318	1.8523	171.317	1.84899
171.407	1.75683	171.409	1.8106	171.407	1.97452	171.416	1.85222	171.414	1.84914
171.505	1.757	171.506	1.81016	171.505	1.97504	171.514	1.85219	171.512	1.8494
171.603	1.75728	171.604	1.80982	171.603	1.97576	171.611	1.85218	171.609	1.84946
171.7	1.75751	171.701	1.80975	171.7	1.97677	171.709	1.85223	171.707	1.84954
171.798	1.75785	171.799	1.80981	171.798	1.97767	171.806	1.85228	171.805	1.84959
171.895	1.75797	171.897	1.81002	171.895	1.97834	171.904	1.85237	171.902	1.8497
171.993	1.758	171.994	1.81041	171.993	1.97712	172.002	1.85257	172	1.84989
172.091	1.75792	172.092	1.81076	172.091	1.9726	172.099	1.85298	172.098	1.85002
172.188	1.75775	172.189	1.81136	172.188	1.9641	172.197	1.85331	172.195	1.84996
172.286	1.75759	172.287	1.812	172.286	1.95195	172.294	1.85368	172.293	1.84973
172.384	1.7576	172.385	1.81276	172.383	1.93819	172.392	1.85411	172.39	1.84949
172.481	1.75762	172.482	1.81386	172.481	1.92549	172.49	1.85459	172.488	1.84931
172.579	1.75751	172.58	1.81474	172.579	1.91761	172.587	1.85501	172.586	1.84893
172.676	1.75733	172.678	1.81546	172.676	1.91479	172.685	1.85541	172.683	1.84859
172.774	1.75734	172.775	1.8162	172.774	1.91583	172.783	1.85584	172.781	1.84804
172.872	1.7575	172.873	1.81657	172.872	1.91852	172.88	1.85644	172.878	1.84712
172.969	1.7577	172.97	1.81698	172.969	1.92241	172.978	1.85709	172.976	1.84629
173.067	1.75805	173.068	1.81727	173.067	1.92783	173.075	1.85763	173.074	1.8458
173.164	1.75827	173.166	1.81748	173.164	1.9339	173.173	1.85805	173.171	1.84552
173.262	1.75831	173.263	1.81719	173.262	1.94023	173.271	1.85844	173.269	1.84542
173.36	1.7584	173.361	1.81687	173.36	1.94564	173.368	1.85886	173.367	1.84529
173.457	1.75857	173.458	1.81662	173.457	1.94873	173.466	1.85922	173.464	1.84513
173.555	1.7586	173.556	1.81658	173.555	1.94855	173.563	1.85961	173.562	1.8451
173.652	1.75867	173.654	1.81643	173.652	1.94516	173.661	1.85972	173.659	1.84511
173.75	1.75858	173.751	1.81642	173.75	1.93869	173.759	1.85967	173.757	1.84497
173.848	1.75867	173.849	1.8164	173.848	1.92931	173.856	1.85947	173.855	1.84492
173.945	1.75877	173.946	1.81597	173.945	1.91846	173.954	1.85908	173.952	1.84485
174.043	1.75885	174.044	1.81576	174.043	1.90763	174.052	1.85848	174.05	1.84478
174.141	1.75894	174.142	1.81548	174.141	1.89969	174.149	1.85787	174.147	1.84472
174.238	1.75896	174.239	1.81571	174.238	1.89459	174.247	1.85714	174.245	1.84452
174.336	1.75895	174.337	1.81594	174.336	1.89033	174.344	1.8563	174.343	1.84441
174.433	1.75878	174.435	1.81591	174.433	1.88573	174.442	1.85539	174.44	1.84423
174.531	1.75887	174.532	1.8158	174.531	1.87918	174.54	1.85432	174.538	1.84407
174.629	1.75897	174.63	1.81569	174.629	1.87018	174.637	1.8533	174.636	1.84389
174.726	1.7589	174.727	1.8157	174.726	1.85908	174.735	1.85235	174.733	1.84398
174.824	1.75867	174.825	1.81594	174.824	1.8465	174.832	1.85128	174.831	1.84421
174.921	1.75845	174.923	1.81634	174.921	1.83239	174.93	1.85005	174.928	1.84435
175.019	1.75816	175.02	1.81683	175.019	1.81677	175.028	1.84889	175.026	1.84417
175.117	1.75793	175.118	1.81731	175.117	1.80081	175.125	1.84754	175.124	1.84392
175.214	1.75792	175.215	1.81772	175.214	1.78552	175.223	1.84629	175.221	1.8437
175.312	1.7581	175.313	1.81809	175.312	1.77293	175.321	1.84499	175.319	1.84357
175.409	1.75854	175.411	1.81846	175.41	1.7641	175.418	1.84366	175.416	1.84346
175.507	1.75892	175.508	1.81866	175.507	1.75901	175.516	1.8424	175.514	1.84334
175.605	1.75937	175.606	1.81881	175.605	1.75633	175.613	1.84139	175.612	1.84319
175.702	1.76001	175.704	1.81872	175.702	1.75615	175.711	1.84031	175.709	1.84311
175.8	1.76081	175.801	1.81849	175.8	1.75932	175.809	1.83924	175.807	1.84311
175.898	1.76181	175.899	1.81842	175.898	1.76569	175.906	1.83828	175.905	1.84311
175.995	1.76287	175.996	1.81822	175.995	1.77431	176.004	1.83729	176.002	1.84336
176.093	1.76402	176.094	1.81798	176.093	1.78143	176.101	1.83643	176.1	1.84377
176.19	1.76523	176.192	1.8176	176.19	1.78777	176.199	1.83545	176.197	1.84426
176.288	1.76639	176.289	1.81724	176.288	1.79566	176.297	1.8346	176.295	1.8446
176.386	1.76759	176.387	1.8171	176.386	1.80504	176.394	1.83384	176.393	1.84496
176.483	1.76858	176.484	1.8171	176.483	1.81501	176.492	1.83327	176.49	1.84532
176.581	1.76959	176.582	1.81711	176.581	1.82636	176.59	1.83259	176.588	1.84562
176.678	1.7705	176.68	1.81715	176.678	1.83924	176.687	1.83194	176.685	1.84584
176.776	1.77136	176.777	1.8172	176.776	1.85307	176.785	1.83152	176.783	1.84617
176.874	1.77211	176.875	1.81713	176.874	1.86709	176.882	1.83134	176.881	1.84664
176.971	1.77266	176.973	1.81701	176.971	1.88151	176.98	1.83122	176.978	1.84711
177.069	1.77333	177.07	1.81679	177.069	1.89676	177.078	1.83131	177.076	1.84757
177.166	1.77371	177.168	1.81653	177.167	1.91219	177.175	1.83155	177.174	1.84807
177.264	1.77357	177.265	1.8163	177.264	1.92516	177.273	1.83172	177.271	1.84854
177.362	1.77306	177.363	1.81607	177.362	1.9352	177.37	1.83193	177.369	1.84908
177.459	1.77251	177.461	1.81584	177.459	1.943	177.468	1.83199	177.466	1.84955
177.557	1.77179	177.558	1.81567	177.557	1.9493	177.566	1.83206	177.564	1.84998
177.655	1.77101	177.656	1.81529	177.655	1.95351	177.663	1.83239	177.662	1.85043
177.752	1.76994	177.753	1.8151	177.752	1.9558	177.761	1.83278	177.759	1.85072
177.85	1.76865	177.851	1.81492	177.85	1.95702	177.859	1.83314	177.857	1.85099
177.947	1.76732	177.949	1.81466	177.947	1.95667	177.956	1.83361	177.954	1.85123
178.045	1.76578	178.046	1.81451	178.045	1.95489	178.054	1.83396	178.052	1.85133
178.143	1.76425	178.144	1.8145	178.143	1.95127	178.151	1.83443	178.15	1.85144
178.24	1.76293	178.241	1.81439	178.24	1.94756	178.249	1.83489	178.247	1.85169
178.338	1.76172	178.339	1.81415	178.338	1.94281	178.347	1.83522	178.345	1.85193
178.435	1.76064	178.437	1.81387	178.436	1.93713	178.444	1.83561	178.443	1.85235
178.533	1.75955	178.534	1.81351	178.533	1.93023	178.542	1.83591	178.54	1.85291
178.631	1.75865	178.632	1.81333	178.631	1.92381	178.639	1.8361	178.638	1.85329
178.728	1.75783	178.73	1.8131	178.728	1.91903	178.737	1.83611	178.735	1.85367
178.826	1.75725	178.827	1.81293	178.826	1.91583	178.835	1.83608	178.833	1.85386
178.923	1.75686	178.925	1.81286	178.924	1.91461	178.932	1.83601	178.931	1.85424
179.021	1.75626	179.022	1.81279	179.021	1.91483	179.03	1.83585	179.028	1.85442
179.119	1.75579	179.12	1.81283	179.119	1.91528	179.128	1.83545	179.126	1.85443
179.216	1.7555	179.218	1.81287	179.216	1.91557	179.225	1.83522	179.223	1.85428
179.314	1.75528	179.315	1.81302	179.314	1.91755	179.323	1.8352	179.321	1.85396
179.412	1.75511	179.413	1.81315	179.412	1.92188	179.42	1.83529	179.419	1.8535
179.509	1.75501	179.51	1.8135	179.509	1.92826	179.518	1.83545	179.516	1.85314
179.607	1.75487	179.608	1.81398	179.607	1.93577	179.616	1.83548	179.614	1.85296
179.704	1.75486	179.706	1.81448	179.704	1.94388	179.713	1.83565	179.712	1.85295
179.802	1.75484	179.803	1.81499	179.802	1.95385	179.811	1.83582	179.809	1.85287
179.9	1.75494	179.901	1.81555	179.9	1.96653	179.908	1.83595	179.907	1.85262
179.997	1.75511	179.999	1.81612	179.997	1.98161	180.006	1.83626	180.004	1.85259
180.095	1.7553	180.096	1.81648	180.095	1.99783	180.104	1.83684	180.102	1.85272
180.192	1.75541	180.194	1.81687	180.193	2.01256	180.201	1.83747	180.2	1.85286
180.29	1.75548	180.291	1.81704	180.29	2.0268	180.299	1.838	180.297	1.85312
180.388	1.7554	180.389	1.81723	180.388	2.04151	180.397	1.83855	180.395	1.85345
180.485	1.75536	180.487	1.81737	180.485	2.05687	180.494	1.83927	180.492	1.8536
180.583	1.75517	180.584	1.81729	180.583	2.07098	180.592	1.84004	180.59	1.85387
180.68	1.75504	180.682	1.81713	180.681	2.08269	180.689	1.84079	180.688	1.85401
180.778	1.75453	180.779	1.81696	180.778	2.09004	180.787	1.84146	180.785	1.85441
180.876	1.75381	180.877	1.81671	180.876	2.0916	180.885	1.84216	180.883	1.85468
180.973	1.75324	180.975	1.81669	180.973	2.08854	180.982	1.84276	180.981	1.85509
181.071	1.75264	181.072	1.81678	181.071	2.08294	181.08	1.84336	181.078	1.85551
181.169	1.75194	181.17	1.81679	181.169	2.07711	181.177	1.84383	181.176	1.85599
181.266	1.75118	181.267	1.81671	181.266	2.07013	181.275	1.84403	181.273	1.85664
181.364	1.75045	181.365	1.81681	181.364	2.06098	181.373	1.84423	181.371	1.85738
181.461	1.74974	181.463	1.81664	181.462	2.04992	181.47	1.84437	181.469	1.85824
181.559	1.74899	181.56	1.81664	181.559	2.03833	181.568	1.84443	181.566	1.85882
181.657	1.74814	181.658	1.81645	181.657	2.02613	181.666	1.8443	181.664	1.85937
181.754	1.74752	181.756	1.81636	181.754	2.01299	181.763	1.8441	181.761	1.8598
181.852	1.74686	181.853	1.81656	181.852	1.99852	181.861	1.84393	181.859	1.86024
181.949	1.74632	181.951	1.8167	181.95	1.98271	181.958	1.84379	181.957	1.86048
182.047	1.74584	182.048	1.81676	182.047	1.96576	182.056	1.84351	182.054	1.86047
182.145	1.74541	182.146	1.81706	182.145	1.94759	182.154	1.84308	182.152	1.86037
182.242	1.74502	182.244	1.81756	182.242	1.92761	182.251	1.84294	182.25	1.85998
182.34	1.74496	182.341	1.81805	182.34	1.90566	182.349	1.84255	182.347	1.85931
182.438	1.74485	182.439	1.81906	182.438	1.88096	182.446	1.84207	182.445	1.85853
182.535	1.74485	182.536	1.82028	182.535	1.85412	182.544	1.8417	182.542	1.85759
182.633	1.74485	182.634	1.82176	182.633	1.82613	182.642	1.84148	182.64	1.85649
182.73	1.74512	182.732	1.82331	182.731	1.79954	182.739	1.84131	182.738	1.85528
182.828	1.74555	182.829	1.82479	182.828	1.77675	182.837	1.84112	182.835	1.85408
182.926	1.74591	182.927	1.82627	182.926	1.75775	182.935	1.84091	182.933	1.85291
183.023	1.74624	183.025	1.82778	183.023	1.74223	183.032	1.84063	183.03	1.85186
183.121	1.74689	183.122	1.8293	183.121	1.72939	183.13	1.84046	183.128	1.85092
183.218	1.74773	183.22	1.83078	183.219	1.71935	183.227	1.84033	183.226	1.84996
183.316	1.7484	183.317	1.83223	183.316	1.71247	183.325	1.8402	183.323	1.84907
183.414	1.74904	183.415	1.83359	183.414	1.70909	183.423	1.84005	183.421	1.84809
183.511	1.7498	183.513	1.83486	183.511	1.70783	183.52	1.83999	183.519	1.84742
183.609	1.75061	183.61	1.83636	183.609	1.70789	183.618	1.83997	183.616	1.84667
183.706	1.7512	183.708	1.83773	183.707	1.70746	183.715	1.84	183.714	1.84609
183.804	1.75171	183.805	1.83872	183.804	1.70727	183.813	1.84002	183.811	1.84551
183.902	1.7522	183.903	1.83968	183.902	1.70871	183.911	1.83992	183.909	1.84497
183.999	1.7526	184.001	1.84088	183.999	1.712	184.008	1.83969	184.007	1.84447
184.097	1.7529	184.098	1.84216	184.097	1.71784	184.106	1.83952	184.104	1.84406
184.195	1.75312	184.196	1.84361	184.195	1.72737	184.204	1.83917	184.202	1.84379
184.292	1.75328	184.293	1.84495	184.292	1.73992	184.301	1.83896	184.299	1.84357
184.39	1.75345	184.391	1.84587	184.39	1.75417	184.399	1.83877	184.397	1.84348
184.487	1.75351	184.489	1.84656	184.488	1.76859	184.496	1.83849	184.495	1.84341
184.585	1.7537	184.586	1.8471	184.585	1.78313	184.594	1.83803	184.592	1.84374
184.683	1.75388	184.684	1.84751	184.683	1.79772	184.692	1.83758	184.69	1.84407
184.78	1.7541	184.782	1.84812	184.78	1.81111	184.789	1.8371	184.788	1.84464
184.878	1.75431	184.879	1.84864	184.878	1.82208	184.887	1.8368	184.885	1.84521
184.975	1.75459	184.977	1.84901	184.976	1.83056	184.984	1.83662	184.983	1.84566
185.073	1.75476	185.074	1.84903	185.073	1.83664	185.082	1.83636	185.08	1.84617
185.171	1.75492	185.172	1.84908	185.171	1.83987	185.18	1.83624	185.178	1.84672
185.268	1.75504	185.27	1.84901	185.268	1.84094	185.277	1.83617	185.276	1.84732
185.366	1.75537	185.367	1.8491	185.366	1.84064	185.375	1.83618	185.373	1.84789
185.463	1.75558	185.465	1.84914	185.464	1.84084	185.473	1.83617	185.471	1.84834
185.561	1.75577	185.562	1.84894	185.561	1.84193	185.57	1.83621	185.569	1.84862
185.659	1.75599	185.66	1.8485	185.659	1.84346	185.668	1.83623	185.666	1.84896
185.756	1.75632	185.758	1.84826	185.757	1.84431	185.765	1.83614	185.764	1.84927
185.854	1.75666	185.855	1.84771	185.854	1.84387	185.863	1.83605	185.861	1.84957
185.952	1.75717	185.953	1.84704	185.952	1.84174	185.961	1.83613	185.959	1.85009
186.049	1.75769	186.051	1.8462	186.049	1.83736	186.058	1.83628	186.057	1.85048
186.147	1.75824	186.148	1.84503	186.147	1.82985	186.156	1.83638	186.154	1.85074
186.244	1.75872	186.246	1.84398	186.245	1.81873	186.253	1.83645	186.252	1.85098
186.342	1.75903	186.343	1.84298	186.342	1.80542	186.351	1.83657	186.349	1.85131
186.44	1.75951	186.441	1.84174	186.44	1.79088	186.449	1.83652	186.447	1.85185
186.537	1.75987	186.539	1.84038	186.537	1.77568	186.546	1.83652	186.545	1.85222
186.635	1.76025	186.636	1.83916	186.635	1.76134	186.644	1.83656	186.642	1.8524
186.732	1.76045	186.734	1.83764	186.733	1.74899	186.742	1.83663	186.74	1.85241
186.83	1.76061	186.831	1.83621	186.83	1.73986	186.839	1.83669	186.838	1.85236
186.928	1.7607	186.929	1.83467	186.928	1.73377	186.937	1.83666	186.935	1.85229
187.025	1.76071	187.027	1.83341	187.026	1.73085	187.034	1.83681	187.033	1.85214
187.123	1.76054	187.124	1.83215	187.123	1.73086	187.132	1.83684	187.13	1.85207
187.22	1.76053	187.222	1.83065	187.221	1.73325	187.23	1.8367	187.228	1.85197
187.318	1.76043	187.32	1.82903	187.318	1.73681	187.327	1.83635	187.326	1.85184
187.416	1.76039	187.417	1.8278	187.416	1.74059	187.425	1.83607	187.423	1.85157
187.513	1.76042	187.515	1.82668	187.514	1.74464	187.522	1.83589	187.521	1.85143
187.611	1.76041	187.612	1.82584	187.611	1.74853	187.62	1.83568	187.618	1.85135
187.709	1.76036	187.71	1.82484	187.709	1.75191	187.718	1.83565	187.716	1.85123
187.806	1.76032	187.808	1.82415	187.806	1.75376	187.815	1.83553	187.814	1.85114
187.904	1.76016	187.905	1.82336	187.904	1.75454	187.913	1.83543	187.911	1.85082
188.001	1.76014	188.003	1.82266	188.002	1.75457	188.011	1.83521	188.009	1.85063
188.099	1.76022	188.1	1.82212	188.099	1.75396	188.108	1.83518	188.107	1.85053
188.197	1.76029	188.198	1.8217	188.197	1.75375	188.206	1.83532	188.204	1.85057
188.294	1.76061	188.296	1.82139	188.294	1.75407	188.303	1.83559	188.302	1.85057
188.392	1.7609	188.393	1.82136	188.392	1.75497	188.401	1.8361	188.399	1.85054
188.489	1.7612	188.491	1.82133	188.49	1.75538	188.499	1.83653	188.497	1.85062
188.587	1.76153	188.588	1.82121	188.587	1.75483	188.596	1.83685	188.595	1.85087
188.685	1.76188	188.686	1.82115	188.685	1.75337	188.694	1.83722	188.692	1.85127
188.782	1.76229	188.784	1.82092	188.783	1.75075	188.791	1.83771	188.79	1.85171
188.88	1.76289	188.881	1.82114	188.88	1.74675	188.889	1.83833	188.887	1.85234
188.977	1.76352	188.979	1.82133	188.978	1.74168	188.987	1.83883	188.985	1.85289
189.075	1.76422	189.077	1.82148	189.075	1.73686	189.084	1.83936	189.083	1.85334
189.173	1.76487	189.174	1.82182	189.173	1.73182	189.182	1.84	189.18	1.85381
189.27	1.76531	189.272	1.82221	189.271	1.72641	189.28	1.84076	189.278	1.85418
189.368	1.76561	189.369	1.82223	189.368	1.72084	189.377	1.84156	189.376	1.85461
189.466	1.76584	189.467	1.82215	189.466	1.71539	189.475	1.8424	189.473	1.85508
189.563	1.76618	189.565	1.82211	189.563	1.71081	189.572	1.84334	189.571	1.85546
189.661	1.76661	189.662	1.82226	189.661	1.70702	189.67	1.84407	189.668	1.85586
189.758	1.76692	189.76	1.82243	189.759	1.70487	189.768	1.84482	189.766	1.85632
189.856	1.76707	189.857	1.82235	189.856	1.70438	189.865	1.84535	189.864	1.85697
189.954	1.76725	189.955	1.82197	189.954	1.7049	189.963	1.84606	189.961	1.85763
190.051	1.76727	190.053	1.82146	190.052	1.70562	190.06	1.84656	190.059	1.85829
190.149	1.76723	190.15	1.82082	190.149	1.70593	190.158	1.84689	190.156	1.85891
190.246	1.7672	190.248	1.82005	190.247	1.70592	190.256	1.84711	190.254	1.85965
190.344	1.76714	190.346	1.81906	190.344	1.70548	190.353	1.84715	190.352	1.86032
190.442	1.76695	190.443	1.81826	190.442	1.70607	190.451	1.84722	190.449	1.86091
190.539	1.76673	190.541	1.81739	190.54	1.70702	190.549	1.8474	190.547	1.86142
190.637	1.76646	190.638	1.81662	190.637	1.70856	190.646	1.84767	190.645	1.86169
190.734	1.7662	190.736	1.81601	190.735	1.71069	190.744	1.84774	190.742	1.86193
190.832	1.7658	190.834	1.81522	190.832	1.71311	190.841	1.84764	190.84	1.86185
190.93	1.76522	190.931	1.81452	190.93	1.71591	190.939	1.84737	190.937	1.86184
191.027	1.76458	191.029	1.81401	191.028	1.71854	191.037	1.84714	191.035	1.86171
191.125	1.76404	191.126	1.81362	191.125	1.72205	191.134	1.84685	191.133	1.86153
191.223	1.76371	191.224	1.81308	191.223	1.72732	191.232	1.84655	191.23	1.86131
191.32	1.76331	191.322	1.8129	191.32	1.73393	191.329	1.84613	191.328	1.86102
191.418	1.76302	191.419	1.81282	191.418	1.74062	191.427	1.84566	191.425	1.86053
191.515	1.76253	191.517	1.81269	191.516	1.74647	191.525	1.84508	191.523	1.86002
191.613	1.76202	191.614	1.81276	191.613	1.75073	191.622	1.8446	191.621	1.8595
191.711	1.76142	191.712	1.81269	191.711	1.7532	191.72	1.84416	191.718	1.85887
191.808	1.76112	191.81	1.81299	191.809	1.75491	191.818	1.84385	191.816	1.85808
191.906	1.76062	191.907	1.81359	191.906	1.75642	191.915	1.84349	191.914	1.85714
192.003	1.76026	192.005	1.81412	192.004	1.75856	192.013	1.84311	192.011	1.85625
192.101	1.75987	192.103	1.81483	192.101	1.7615	192.11	1.84271	192.109	1.85536
192.199	1.75949	192.2	1.81554	192.199	1.76472	192.208	1.84226	192.206	1.85426
192.296	1.75917	192.298	1.8164	192.297	1.76776	192.306	1.84188	192.304	1.85327
192.394	1.75892	192.395	1.81722	192.394	1.7692	192.403	1.84155	192.402	1.85226
192.491	1.75874	192.493	1.81802	192.492	1.76967	192.501	1.8411	192.499	1.85129
192.589	1.75863	192.591	1.81876	192.589	1.77002	192.598	1.84047	192.597	1.8504
192.687	1.75862	192.688	1.81934	192.687	1.77047	192.696	1.83985	192.694	1.84948
192.784	1.75848	192.786	1.81983	192.785	1.77054	192.794	1.83954	192.792	1.84873
192.882	1.7585	192.883	1.82022	192.882	1.76983	192.891	1.83935	192.89	1.84784
192.98	1.75857	192.981	1.82039	192.98	1.76843	192.989	1.8392	192.987	1.84692
193.077	1.7585	193.079	1.82032	193.078	1.76644	193.087	1.8393	193.085	1.84589
193.175	1.75829	193.176	1.82049	193.175	1.76361	193.184	1.83951	193.183	1.84489
193.272	1.75826	193.274	1.82035	193.273	1.76049	193.282	1.8398	193.28	1.84383
193.37	1.75812	193.372	1.82012	193.37	1.75787	193.379	1.84009	193.378	1.84294
193.468	1.75812	193.469	1.81989	193.468	1.75629	193.477	1.84075	193.475	1.84206
193.565	1.75799	193.567	1.81938	193.566	1.75666	193.575	1.84159	193.573	1.84134
193.663	1.75805	193.664	1.81906	193.663	1.75871	193.672	1.84255	193.671	1.8407
193.76	1.75794	193.762	1.81879	193.761	1.76214	193.77	1.84353	193.768	1.8401
193.858	1.75793	193.86	1.81836	193.858	1.76657	193.867	1.84459	193.866	1.83959
193.956	1.75787	193.957	1.81832	193.956	1.77247	193.965	1.84589	193.963	1.83915
194.053	1.75798	194.055	1.81818	194.054	1.77885	194.063	1.84718	194.061	1.83876
194.151	1.7579	194.152	1.81798	194.151	1.78458	194.16	1.84857	194.159	1.8386
194.249	1.7577	194.25	1.81779	194.249	1.79016	194.258	1.85013	194.256	1.8384
194.346	1.75756	194.348	1.8177	194.347	1.79733	194.356	1.85153	194.354	1.8382
194.444	1.7574	194.445	1.81768	194.444	1.8081	194.453	1.85277	194.452	1.83812
194.541	1.75734	194.543	1.81767	194.542	1.82093	194.551	1.85399	194.549	1.83799
194.639	1.75704	194.64	1.81784	194.639	1.83476	194.648	1.85517	194.647	1.83792
194.737	1.75693	194.738	1.81801	194.737	1.84913	194.746	1.85606	194.744	1.838
194.834	1.75687	194.836	1.8184	194.835	1.86404	194.844	1.85692	194.842	1.83836
194.932	1.75679	194.933	1.8188	194.932	1.87835	194.941	1.85762	194.94	1.83883
195.029	1.75682	195.031	1.81965	195.03	1.89143	195.039	1.85812	195.037	1.83934
[truncated: 25,869 more rows]

## Sheet: GCaFLITS
Fly 0 time (s)	Fly 0 Lifetime (ns)	Fly 1 time (s)	Fly 1 Lifetime (ns)	Fly 2 time (s)	Fly 2 Lifetime (ns)	Fly 3 time (s)	Fly 3 Lifetime (ns)	Fly 4 time (s)	Fly 4 Lifetime (ns)	Fly 5 time (s)	Fly 5 Lifetime (ns)	Fly 6 time (s)	Fly 6 Lifetime (ns)	Fly 7 time (s)	Fly 7 Lifetime (ns)	Fly 8 time (s)	Fly 8 Lifetime (ns)	Fly 9 time (s)	Fly 9 Lifetime (ns)
0	2.81062	0	2.74	0	2.65716	0	2.6886	0	2.78692	0	2.78771	0	2.82814	0	2.88993	0	2.77173	0	2.60534
0.113884	2.80969	0.113896	2.73826	0.113882	2.65436	0.113883	2.68577	0.097613	2.78498	0.097625	2.78709	0.0975998	2.82759	0.0976131	2.88833	0.0976119	2.77051	0.097613	2.60573
0.227779	2.8088	0.227779	2.7368	0.227753	2.65152	0.227767	2.683	0.195225	2.78369	0.195237	2.78641	0.1952	2.82709	0.195212	2.8867	0.195225	2.76942	0.195225	2.60546
0.341663	2.80804	0.341662	2.73562	0.341636	2.64935	0.341636	2.68041	0.292838	2.78217	0.292863	2.7859	0.292798	2.8267	0.292825	2.88488	0.292837	2.76787	0.292838	2.60544
0.455546	2.80715	0.455559	2.73442	0.45552	2.64754	0.45552	2.67783	0.39045	2.78049	0.390475	2.78554	0.390398	2.82627	0.390425	2.88349	0.39045	2.76621	0.390451	2.60527
0.569443	2.8065	0.569442	2.73278	0.56939	2.64603	0.569403	2.67527	0.488063	2.77918	0.4881	2.78456	0.487998	2.82543	0.488038	2.8819	0.488062	2.76449	0.48805	2.60514
0.683326	2.80586	0.683326	2.73149	0.683274	2.64459	0.683287	2.6727	0.585675	2.77765	0.585726	2.78381	0.585598	2.8245	0.585638	2.88035	0.585675	2.76274	0.585663	2.60466
0.797209	2.80508	0.797222	2.73056	0.797157	2.64376	0.79717	2.67043	0.683288	2.77594	0.683338	2.78272	0.683197	2.82353	0.683251	2.87875	0.6833	2.76141	0.683275	2.60436
0.911106	2.80434	0.911106	2.73019	0.911041	2.64294	0.911054	2.6682	0.780887	2.77447	0.780963	2.78149	0.780796	2.82248	0.78085	2.87686	0.780912	2.76043	0.780888	2.60398
1.02499	2.80361	1.02499	2.73017	1.02491	2.64213	1.02492	2.66611	0.8785	2.77338	0.878576	2.78017	0.878396	2.82126	0.878463	2.87489	0.878525	2.75942	0.878501	2.60312
1.13887	2.80295	1.13887	2.73044	1.13879	2.64147	1.13881	2.66445	0.976112	2.77223	0.976201	2.77904	0.975995	2.82002	0.976063	2.87288	0.976137	2.75846	0.976113	2.60208
1.25277	2.80188	1.25277	2.73015	1.25268	2.63958	1.25269	2.66184	1.07372	2.77059	1.07381	2.77769	1.07359	2.81834	1.07368	2.87055	1.07375	2.75729	1.07371	2.60165
1.36665	2.80047	1.36665	2.72947	1.36655	2.63799	1.36657	2.65913	1.17134	2.76903	1.17144	2.77615	1.17119	2.81682	1.17128	2.86793	1.17136	2.75582	1.17132	2.60113
1.48054	2.79918	1.48054	2.72865	1.48043	2.63633	1.48046	2.6563	1.26895	2.76735	1.26906	2.77488	1.26879	2.81529	1.26889	2.86523	1.26898	2.75461	1.26894	2.60119
1.59443	2.79798	1.59443	2.72748	1.59431	2.63486	1.59434	2.65331	1.36656	2.76536	1.36668	2.77354	1.36639	2.81384	1.36649	2.8625	1.36659	2.7534	1.36655	2.60168
1.70832	2.79651	1.70832	2.72604	1.70819	2.63322	1.70821	2.65066	1.46417	2.76355	1.4643	2.77223	1.46399	2.81252	1.4641	2.85987	1.46421	2.75182	1.46416	2.6017
1.8222	2.79489	1.8222	2.72453	1.82207	2.63118	1.82209	2.64816	1.56179	2.76132	1.56191	2.77104	1.56159	2.81105	1.5617	2.85693	1.56182	2.75075	1.56178	2.60182
1.9361	2.79307	1.9361	2.72292	1.93595	2.6297	1.93598	2.64572	1.6594	2.75899	1.65954	2.76973	1.65919	2.80998	1.65931	2.85445	1.65944	2.75015	1.65937	2.6017
2.04998	2.79148	2.04998	2.72095	2.04984	2.62859	2.04986	2.64376	1.75701	2.75757	1.75715	2.76873	1.75679	2.80892	1.75691	2.85196	1.75705	2.74964	1.75699	2.60111
2.16386	2.79025	2.16386	2.71944	2.16371	2.62738	2.16374	2.64178	1.85462	2.75603	1.85478	2.76785	1.85439	2.80815	1.85453	2.84989	1.85466	2.74882	1.8546	2.60029
2.27776	2.78891	2.27774	2.71769	2.27759	2.62657	2.27763	2.64015	1.95224	2.75496	1.95239	2.76676	1.95199	2.80706	1.95213	2.8482	1.95228	2.74786	1.95221	2.59932
2.39164	2.78743	2.39164	2.71664	2.39147	2.62639	2.3915	2.63875	2.04984	2.75414	2.05002	2.76581	2.04959	2.80601	2.04974	2.8467	2.04989	2.74713	2.04982	2.59826
2.50553	2.7862	2.50552	2.71584	2.50534	2.62647	2.50538	2.63752	2.14745	2.75299	2.14763	2.76475	2.14719	2.80479	2.14734	2.8454	2.1475	2.74629	2.14744	2.59667
2.61942	2.78526	2.61941	2.71497	2.61923	2.62631	2.61927	2.63628	2.24506	2.75212	2.24525	2.76356	2.24479	2.80339	2.24495	2.84451	2.24513	2.74578	2.24504	2.59453
2.7333	2.78449	2.7333	2.71448	2.73311	2.62609	2.73315	2.63533	2.34267	2.75154	2.34288	2.76232	2.34239	2.80189	2.34255	2.84359	2.34274	2.74514	2.34265	2.59259
2.84719	2.78366	2.84719	2.71439	2.84698	2.62568	2.84703	2.63451	2.44028	2.75062	2.44049	2.76144	2.43999	2.80069	2.44016	2.84289	2.44035	2.74492	2.44026	2.59049
2.96109	2.78287	2.96107	2.71404	2.96086	2.62533	2.96092	2.63369	2.5379	2.74994	2.53812	2.76031	2.53759	2.79964	2.53776	2.84257	2.53796	2.74439	2.53787	2.58922
3.07497	2.78244	3.07497	2.71369	3.07475	2.6245	3.07478	2.63285	2.63551	2.74958	2.63573	2.75952	2.63519	2.79874	2.63538	2.84221	2.63558	2.7434	2.63549	2.58727
3.18885	2.78215	3.18885	2.71305	3.18863	2.624	3.18867	2.63228	2.73312	2.74875	2.73335	2.75884	2.73279	2.79793	2.73298	2.84232	2.73319	2.74277	2.7331	2.58535
3.30273	2.78168	3.30273	2.71168	3.3025	2.62359	3.30255	2.63178	2.83073	2.74748	2.83097	2.75824	2.83039	2.79727	2.83059	2.84241	2.8308	2.74235	2.8307	2.58363
3.41663	2.78142	3.41662	2.70997	3.41638	2.62352	3.41644	2.63077	2.92835	2.74637	2.92859	2.75761	2.92799	2.7967	2.92819	2.84276	2.92841	2.742	2.92831	2.58169
3.53052	2.78141	3.53051	2.70862	3.53027	2.62379	3.53032	2.62981	3.02596	2.74522	3.0262	2.75686	3.02559	2.79575	3.0258	2.84302	3.02603	2.74126	3.02592	2.57873
3.6444	2.78164	3.6444	2.70727	3.64414	2.62375	3.6442	2.62891	3.12357	2.74435	3.12383	2.75639	3.12318	2.79501	3.1234	2.84365	3.12365	2.74103	3.12354	2.57601
3.7583	2.78163	3.75828	2.70617	3.75802	2.62429	3.75807	2.62831	3.22117	2.74353	3.22144	2.75579	3.22078	2.79433	3.221	2.8443	3.22126	2.74027	3.22115	2.57261
3.87218	2.78144	3.87216	2.70539	3.8719	2.62491	3.87196	2.62741	3.31878	2.74292	3.31907	2.75505	3.31838	2.79362	3.31861	2.84495	3.31888	2.73961	3.31876	2.56816
3.98606	2.78154	3.98606	2.70461	3.98577	2.62595	3.98584	2.62628	3.4164	2.74224	3.41669	2.7539	3.41598	2.79249	3.41621	2.8455	3.41649	2.73895	3.41636	2.56407
4.09996	2.78146	4.09994	2.704	4.09966	2.62725	4.09972	2.62498	3.51401	2.74168	3.5143	2.75297	3.51358	2.79151	3.51383	2.84612	3.5141	2.73808	3.51397	2.55971
4.21384	2.78158	4.21383	2.70348	4.21354	2.62857	4.21361	2.62344	3.61162	2.74101	3.61193	2.75228	3.61118	2.79035	3.61143	2.84656	3.61171	2.73676	3.61159	2.55586
4.32773	2.7816	4.32772	2.70358	4.32742	2.62958	4.32749	2.62193	3.70923	2.74015	3.70954	2.75143	3.70878	2.78913	3.70904	2.84683	3.70933	2.73543	3.7092	2.55235
4.44161	2.78145	4.44161	2.70352	4.44129	2.63051	4.44136	2.62043	3.80685	2.73919	3.80717	2.75057	3.80638	2.78788	3.80664	2.8466	3.80694	2.73444	3.80681	2.54879
4.5555	2.78146	4.55549	2.70365	4.55518	2.63079	4.55524	2.61918	3.90446	2.73794	3.90478	2.75031	3.90399	2.78733	3.90425	2.84622	3.90455	2.73376	3.90442	2.54501
4.66939	2.78174	4.66937	2.70298	4.66906	2.63102	4.66913	2.61813	4.00207	2.73649	4.00241	2.75015	4.00159	2.78683	4.00185	2.84607	4.00218	2.73346	4.00202	2.54205
4.78327	2.78178	4.78327	2.70207	4.78293	2.6314	4.78301	2.6171	4.09968	2.73521	4.10002	2.75036	4.09919	2.78655	4.09946	2.84563	4.09979	2.73334	4.09964	2.53998
4.89717	2.78168	4.89715	2.70085	4.89682	2.63174	4.89689	2.61607	4.1973	2.73395	4.19764	2.7508	4.19679	2.78647	4.19706	2.84515	4.1974	2.7334	4.19725	2.53832
5.01105	2.78168	5.01104	2.69919	5.0107	2.63189	5.01078	2.61542	4.29491	2.73246	4.29526	2.75145	4.29439	2.78652	4.29468	2.84458	4.29501	2.73386	4.29486	2.53673
5.12494	2.78173	5.12493	2.69724	5.12457	2.6321	5.12465	2.6153	4.39252	2.73141	4.39288	2.7525	4.39199	2.78676	4.39228	2.84417	4.39263	2.73466	4.39247	2.53523
5.23883	2.7819	5.23882	2.69559	5.23845	2.63228	5.23853	2.61552	4.49012	2.7304	4.49049	2.75361	4.48959	2.78713	4.48989	2.84347	4.49024	2.7361	4.49009	2.53298
5.35271	2.78192	5.3527	2.69378	5.35234	2.63295	5.35241	2.61631	4.58773	2.7293	4.58812	2.75443	4.58719	2.78731	4.58749	2.84306	4.58785	2.73798	4.58769	2.53128
5.4666	2.78179	5.46658	2.69158	5.46622	2.63344	5.4663	2.61702	4.68534	2.72878	4.68573	2.75558	4.68479	2.78769	4.6851	2.84252	4.68546	2.73944	4.6853	2.52973
5.58048	2.78165	5.58048	2.69047	5.58009	2.63393	5.58018	2.61785	4.78296	2.72889	4.78336	2.75694	4.78239	2.78821	4.7827	2.84224	4.78308	2.7406	4.78291	2.52848
5.69438	2.78134	5.69436	2.68943	5.69397	2.63437	5.69406	2.61897	4.88057	2.72925	4.88098	2.75816	4.87999	2.78864	4.88031	2.84189	4.88069	2.74177	4.88052	2.52768
5.80826	2.78058	5.80825	2.68835	5.80786	2.63445	5.80793	2.62008	4.97818	2.72978	4.97859	2.7591	4.97759	2.78936	4.97791	2.84144	4.97831	2.74321	4.97814	2.52709
5.92214	2.77977	5.92213	2.68753	5.92173	2.63408	5.92182	2.62111	5.07579	2.73	5.07622	2.75955	5.07519	2.78994	5.07553	2.84081	5.07593	2.74417	5.07574	2.52644
6.03604	2.77908	6.03603	2.68671	6.03561	2.63325	6.0357	2.62223	5.17341	2.73004	5.17383	2.76017	5.17279	2.7904	5.17313	2.84001	5.17354	2.74511	5.17335	2.5261
6.14992	2.77839	6.14991	2.68608	6.14949	2.63241	6.14958	2.62359	5.27102	2.73004	5.27146	2.7608	5.27039	2.79086	5.27074	2.83934	5.27115	2.74549	5.27096	2.5263
6.26381	2.77783	6.26379	2.68585	6.26336	2.63116	6.26347	2.62471	5.36863	2.73015	5.36907	2.76137	5.36799	2.79169	5.36834	2.83841	5.36876	2.74614	5.36857	2.5264
6.37769	2.77761	6.37769	2.68531	6.37725	2.63021	6.37735	2.62573	5.46624	2.73033	5.46669	2.76174	5.46559	2.79251	5.46595	2.83759	5.46638	2.74656	5.46619	2.52689
6.49159	2.77725	6.49157	2.68509	6.49113	2.62918	6.49122	2.62669	5.56386	2.73064	5.56431	2.76212	5.56319	2.7933	5.56355	2.83666	5.56399	2.74725	5.5638	2.52714
6.60547	2.77726	6.60546	2.68461	6.60501	2.62819	6.6051	2.62756	5.66147	2.7309	5.66193	2.7622	5.66078	2.79418	5.66115	2.83581	5.6616	2.74817	5.6614	2.52758
6.71935	2.77738	6.71934	2.68378	6.71888	2.62728	6.71899	2.62844	5.75907	2.73102	5.75954	2.76188	5.75838	2.79503	5.75877	2.8351	5.75921	2.74967	5.75901	2.528
6.83325	2.77762	6.83323	2.68317	6.83277	2.62672	6.83287	2.62901	5.85668	2.7314	5.85717	2.76105	5.85598	2.79546	5.85636	2.83447	5.85683	2.75067	5.85662	2.52855
6.94713	2.77795	6.94712	2.68268	6.94665	2.62615	6.94675	2.6295	5.95429	2.73176	5.95478	2.76013	5.95358	2.79591	5.95398	2.83399	5.95444	2.75119	5.95424	2.52895
7.06102	2.77839	7.061	2.68213	7.06052	2.62575	7.06064	2.63039	6.05191	2.73214	6.05241	2.75919	6.05118	2.79631	6.05158	2.83375	6.05205	2.75174	6.05185	2.52935
7.1749	2.77882	7.17489	2.68192	7.17441	2.62562	7.17451	2.63092	6.14952	2.73257	6.15002	2.75812	6.14878	2.79655	6.14919	2.83349	6.14968	2.75246	6.14945	2.52988
7.2888	2.77918	7.28878	2.6822	7.28829	2.62569	7.28839	2.63091	6.24713	2.73304	6.24765	2.75682	6.24638	2.7967	6.24679	2.83331	6.24729	2.75332	6.24706	2.53065
7.40268	2.77938	7.40267	2.68248	7.40216	2.62587	7.40228	2.63048	6.34474	2.73308	6.34526	2.75507	6.34398	2.79636	6.3444	2.83313	6.3449	2.75321	6.34467	2.53187
7.51656	2.77922	7.51655	2.68272	7.51604	2.6257	7.51616	2.62988	6.44236	2.73307	6.44288	2.75368	6.44158	2.79576	6.442	2.83287	6.44251	2.7528	6.44229	2.5331
7.63045	2.77903	7.63043	2.68263	7.62993	2.62499	7.63004	2.62883	6.53997	2.73309	6.5405	2.75226	6.53918	2.79545	6.53962	2.83239	6.54013	2.75215	6.5399	2.53454
7.74434	2.77871	7.74433	2.68318	7.74381	2.62437	7.74392	2.62813	6.63758	2.73294	6.63812	2.75066	6.63678	2.79502	6.63722	2.832	6.63774	2.75149	6.63751	2.53573
7.85823	2.77845	7.85821	2.68317	7.85768	2.62378	7.8578	2.62739	6.73519	2.73249	6.73573	2.74894	6.73438	2.7946	6.73483	2.83155	6.73535	2.75086	6.73511	2.5371
7.97211	2.7779	7.97209	2.68326	7.97156	2.62312	7.97168	2.62661	6.83281	2.7315	6.83336	2.74759	6.83198	2.79415	6.83243	2.83122	6.83296	2.75002	6.83272	2.53819
8.08601	2.77749	8.08598	2.68359	8.08545	2.62273	8.08556	2.62592	6.93042	2.73038	6.93097	2.74671	6.92958	2.79366	6.93004	2.83089	6.93058	2.74932	6.93033	2.5393
8.19989	2.77717	8.19987	2.68384	8.19932	2.62281	8.19945	2.62516	7.02802	2.7292	7.0286	2.74609	7.02718	2.79311	7.02764	2.83045	7.02819	2.7486	7.02795	2.54023
8.31377	2.77715	8.31376	2.68391	8.3132	2.62272	8.31333	2.62387	7.12563	2.72828	7.12621	2.7453	7.12478	2.79267	7.12525	2.83028	7.1258	2.74772	7.12556	2.54088
8.42766	2.77715	8.42764	2.68326	8.42708	2.62242	8.42721	2.62289	7.22324	2.72737	7.22383	2.74465	7.22238	2.7925	7.22285	2.83006	7.22341	2.747	7.22316	2.5418
8.54155	2.77704	8.54152	2.6821	8.54095	2.62228	8.54108	2.62227	7.32085	2.72641	7.32146	2.74431	7.31998	2.7923	7.32047	2.82995	7.32104	2.74645	7.32077	2.54242
8.65544	2.77699	8.65542	2.68121	8.65484	2.62183	8.65497	2.62186	7.41847	2.7256	7.41907	2.74362	7.41758	2.79182	7.41807	2.82993	7.41865	2.746	7.41838	2.54328
8.76932	2.77711	8.7693	2.68024	8.76872	2.62155	8.76885	2.6219	7.51608	2.72451	7.5167	2.74288	7.51518	2.79135	7.51567	2.83003	7.51627	2.74541	7.516	2.54427
8.8832	2.77712	8.88319	2.67923	8.8826	2.62185	8.88273	2.62167	7.61369	2.72333	7.61431	2.74244	7.61278	2.79084	7.61328	2.83014	7.61388	2.74493	7.61361	2.54506
8.9971	2.77724	8.99707	2.67861	8.99647	2.62242	8.99662	2.62148	7.7113	2.72223	7.71193	2.74244	7.71038	2.78997	7.71088	2.83007	7.71149	2.74359	7.71122	2.54614
9.11098	2.77734	9.11097	2.67768	9.11036	2.62321	9.1105	2.62133	7.80892	2.72145	7.80955	2.74246	7.80797	2.78867	7.80849	2.83001	7.8091	2.74278	7.80882	2.54768
9.22487	2.77742	9.22485	2.677	9.22424	2.62397	9.22437	2.62111	7.90653	2.7209	7.90717	2.74264	7.90557	2.78726	7.90609	2.82983	7.90671	2.74201	7.90643	2.5492
9.33876	2.77731	9.33873	2.67642	9.33811	2.62453	9.33825	2.62073	8.00414	2.72047	8.00478	2.74262	8.00317	2.78618	8.0037	2.82978	8.00433	2.74138	8.00405	2.55063
9.45265	2.77716	9.45262	2.67612	9.45199	2.62492	9.45214	2.62143	8.10175	2.71995	8.10241	2.74253	8.10077	2.78522	8.1013	2.82954	8.10194	2.7401	8.10166	2.55185
9.56653	2.7769	9.56651	2.67577	9.56588	2.62538	9.56602	2.62235	8.19937	2.71955	8.20002	2.74238	8.19837	2.78429	8.19892	2.82933	8.19955	2.73838	8.19927	2.55283
9.68041	2.77641	9.6804	2.67606	9.67975	2.62573	9.6799	2.62295	8.29697	2.71953	8.29765	2.74238	8.29597	2.78375	8.29652	2.82912	8.29716	2.73714	8.29687	2.55376
9.79431	2.77627	9.79428	2.67618	9.79363	2.62639	9.79379	2.62358	8.39458	2.71959	8.39526	2.74239	8.39357	2.78365	8.39413	2.82896	8.39478	2.7362	8.39448	2.55455
9.90819	2.77599	9.90816	2.67653	9.90751	2.62714	9.90766	2.62411	8.49219	2.71996	8.49289	2.74273	8.49117	2.78346	8.49173	2.82892	8.49239	2.73555	8.4921	2.55523
10.0221	2.77575	10.0221	2.67676	10.0214	2.62788	10.0215	2.62438	8.5898	2.72051	8.5905	2.74281	8.58877	2.78346	8.58934	2.82888	8.59	2.73482	8.58971	2.5561
10.136	2.7756	10.1359	2.67668	10.1353	2.62825	10.1354	2.62439	8.68742	2.72085	8.68812	2.74291	8.68637	2.78373	8.68694	2.82898	8.68763	2.73399	8.68732	2.55634
10.2499	2.77589	10.2498	2.67626	10.2492	2.62825	10.2493	2.62448	8.78503	2.72135	8.78574	2.74291	8.78397	2.7844	8.78455	2.82875	8.78524	2.73336	8.78492	2.55691
10.3637	2.7761	10.3637	2.67553	10.363	2.62806	10.3632	2.62454	8.88264	2.72174	8.88336	2.74276	8.88157	2.7854	8.88215	2.82852	8.88285	2.73263	8.88253	2.55797
10.4776	2.77659	10.4776	2.67475	10.4769	2.62752	10.4771	2.62462	8.98025	2.72227	8.98097	2.74271	8.97917	2.7861	8.97977	2.82818	8.98047	2.73239	8.98015	2.55885
10.5915	2.77674	10.5915	2.67351	10.5908	2.62721	10.5909	2.62488	9.07786	2.72255	9.0786	2.7428	9.07677	2.78666	9.07737	2.82766	9.07808	2.73292	9.07776	2.55993
10.7054	2.77714	10.7054	2.67282	10.7047	2.62702	10.7048	2.62471	9.17548	2.7229	9.17621	2.74306	9.17437	2.78683	9.17497	2.82726	9.17569	2.73393	9.17537	2.56076
10.8193	2.77765	10.8193	2.67202	10.8186	2.62681	10.8187	2.62459	9.27309	2.72311	9.27384	2.74326	9.27197	2.78692	9.27258	2.82685	9.2733	2.73469	9.27297	2.5618
10.9332	2.77776	10.9332	2.67174	10.9324	2.62697	10.9326	2.62424	9.3707	2.72269	9.37145	2.74354	9.36957	2.78719	9.37018	2.82647	9.37091	2.7354	9.37058	2.56254
11.0471	2.77786	11.047	2.67147	11.0463	2.62728	11.0465	2.62369	9.46831	2.72254	9.46907	2.74358	9.46717	2.78739	9.46779	2.82602	9.46853	2.73596	9.4682	2.56303
11.161	2.77793	11.1609	2.67128	11.1602	2.62685	11.1604	2.62338	9.56593	2.72239	9.56669	2.74389	9.56477	2.78751	9.56539	2.82553	9.56614	2.7365	9.56581	2.56365
11.2748	2.77784	11.2748	2.6714	11.2741	2.62618	11.2742	2.62325	9.66353	2.72243	9.66431	2.74397	9.66237	2.78788	9.663	2.82509	9.66375	2.7378	9.66342	2.564
11.3887	2.77762	11.3887	2.67208	11.3879	2.62557	11.3881	2.62335	9.76114	2.72216	9.76192	2.74421	9.75996	2.78853	9.7606	2.82464	9.76137	2.73859	9.76103	2.56347
11.5026	2.77728	11.5026	2.67262	11.5018	2.62482	11.502	2.62333	9.85875	2.72174	9.85955	2.7444	9.85756	2.78898	9.85822	2.82425	9.85898	2.73984	9.85863	2.56231
11.6165	2.77699	11.6165	2.6735	11.6157	2.62411	11.6159	2.62328	9.95636	2.72104	9.95716	2.74446	9.95516	2.78912	9.95582	2.82395	9.95659	2.74033	9.95625	2.561
11.7304	2.77652	11.7303	2.6744	11.7296	2.62352	11.7298	2.62241	10.054	2.72051	10.0548	2.74473	10.0528	2.78923	10.0534	2.82396	10.0542	2.74134	10.0539	2.55992
11.8443	2.77627	11.8442	2.67535	11.8435	2.62258	11.8436	2.62148	10.1516	2.71983	10.1524	2.74497	10.1504	2.78943	10.151	2.82364	10.1518	2.74257	10.1515	2.55842
11.9581	2.7763	11.9581	2.67604	11.9574	2.62193	11.9575	2.62078	10.2492	2.71906	10.25	2.74531	10.248	2.78941	10.2486	2.82336	10.2494	2.74362	10.2491	2.5568
12.072	2.77638	12.072	2.67648	12.0712	2.62122	12.0714	2.62027	10.3468	2.71837	10.3476	2.74535	10.3456	2.78897	10.3462	2.82314	10.3471	2.74431	10.3467	2.55533
12.1859	2.7768	12.1859	2.67705	12.1851	2.6204	12.1853	2.62003	10.4444	2.71709	10.4453	2.74561	10.4432	2.78862	10.4439	2.8229	10.4447	2.7448	10.4443	2.55385
12.2998	2.77741	12.2998	2.67743	12.299	2.61937	12.2992	2.61997	10.542	2.71551	10.5429	2.74588	10.5408	2.7881	10.5415	2.82286	10.5423	2.74503	10.5419	2.55219
12.4137	2.77789	12.4137	2.67778	12.4129	2.61884	12.4131	2.62028	10.6397	2.71413	10.6405	2.74578	10.6384	2.78744	10.6391	2.82273	10.6399	2.74568	10.6395	2.55126
12.5276	2.77824	12.5276	2.67848	12.5267	2.61837	12.5269	2.62033	10.7373	2.71293	10.7381	2.74547	10.736	2.78662	10.7367	2.8232	10.7375	2.74644	10.7371	2.55043
12.6415	2.77872	12.6414	2.67928	12.6406	2.61791	12.6408	2.62009	10.8349	2.71204	10.8357	2.74479	10.8336	2.78583	10.8343	2.82388	10.8351	2.74692	10.8347	2.54902
12.7554	2.77911	12.7553	2.67987	12.7545	2.61787	12.7547	2.61987	10.9325	2.71133	10.9334	2.74415	10.9312	2.78547	10.9319	2.82498	10.9327	2.74734	10.9323	2.548
12.8692	2.77944	12.8692	2.68088	12.8684	2.61776	12.8686	2.61973	11.0301	2.71077	11.031	2.74322	11.0288	2.78524	11.0295	2.82611	11.0303	2.7474	11.03	2.5467
12.9831	2.77945	12.9831	2.68149	12.9823	2.61818	12.9825	2.61984	11.1277	2.71045	11.1286	2.74208	11.1264	2.7851	11.1271	2.82735	11.128	2.74679	11.1276	2.54573
13.097	2.77919	13.097	2.68228	13.0961	2.61868	13.0963	2.61982	11.2253	2.70999	11.2262	2.74095	11.224	2.78515	11.2247	2.82856	11.2256	2.74651	11.2252	2.54453
13.2109	2.77898	13.2109	2.68252	13.21	2.6187	13.2102	2.61971	11.3229	2.71008	11.3238	2.74028	11.3216	2.78525	11.3223	2.82964	11.3232	2.74673	11.3228	2.54317
13.3248	2.77878	13.3248	2.68287	13.3239	2.61877	13.3241	2.6197	11.4205	2.71012	11.4214	2.73954	11.4192	2.78542	11.4199	2.83076	11.4208	2.74739	11.4204	2.54163
13.4387	2.77832	13.4387	2.68332	13.4378	2.61935	13.438	2.61995	11.5181	2.71034	11.5191	2.73853	11.5168	2.78556	11.5175	2.83181	11.5184	2.74846	11.518	2.54027
13.5526	2.77758	13.5525	2.68387	13.5517	2.61984	13.5519	2.62013	11.6158	2.71049	11.6167	2.73789	11.6144	2.78569	11.6151	2.83299	11.616	2.7485	11.6156	2.53865
13.6664	2.77717	13.6664	2.68387	13.6655	2.62004	13.6657	2.61987	11.7134	2.71056	11.7143	2.73747	11.712	2.78599	11.7127	2.83413	11.7136	2.7488	11.7132	2.53715
13.7803	2.77689	13.7803	2.68434	13.7794	2.62071	13.7796	2.62012	11.811	2.71077	11.8119	2.73734	11.8096	2.78634	11.8103	2.83492	11.8112	2.74884	11.8108	2.53638
13.8942	2.77664	13.8942	2.68458	13.8933	2.62108	13.8935	2.62023	11.9086	2.71093	11.9095	2.73762	11.9072	2.78654	11.9079	2.83546	11.9089	2.74923	11.9084	2.53577
14.0081	2.77674	14.0081	2.68454	14.0072	2.62166	14.0074	2.62073	12.0062	2.71084	12.0072	2.73773	12.0048	2.78659	12.0055	2.83598	12.0065	2.74922	12.0061	2.53547
14.122	2.77669	14.122	2.68438	14.1211	2.62255	14.1213	2.62121	12.1038	2.71089	12.1048	2.73795	12.1024	2.78658	12.1031	2.83657	12.1041	2.74925	12.1037	2.53527
14.2359	2.77691	14.2358	2.68398	14.2349	2.62315	14.2351	2.62178	12.2014	2.71108	12.2024	2.73803	12.2	2.78651	12.2008	2.83712	12.2017	2.74941	12.2013	2.53524
14.3498	2.77713	14.3497	2.68383	14.3488	2.62356	14.349	2.62207	12.299	2.71157	12.3	2.73812	12.2976	2.78654	12.2984	2.83751	12.2993	2.74981	12.2989	2.5356
14.4637	2.77697	14.4636	2.68321	14.4627	2.62417	14.4629	2.62202	12.3966	2.71259	12.3976	2.73804	12.3952	2.78632	12.396	2.83784	12.3969	2.74984	12.3965	2.53615
14.5775	2.77681	14.5775	2.68254	14.5766	2.62484	14.5768	2.62161	12.4943	2.7136	12.4953	2.73806	12.4928	2.7862	12.4936	2.83792	12.4945	2.75002	12.4941	2.53693
14.6914	2.77695	14.6914	2.6819	14.6905	2.62519	14.6907	2.62108	12.5919	2.71453	12.5929	2.73835	12.5904	2.78569	12.5912	2.83795	12.5922	2.75027	12.5917	2.53756
14.8053	2.77694	14.8053	2.68142	14.8043	2.62581	14.8046	2.62103	12.6895	2.71529	12.6905	2.73861	12.688	2.78473	12.6888	2.83769	12.6898	2.75026	12.6893	2.538
14.9192	2.7769	14.9192	2.68059	14.9182	2.62656	14.9184	2.62102	12.7871	2.71574	12.7881	2.73924	12.7856	2.78383	12.7864	2.83726	12.7874	2.75075	12.7869	2.53936
15.0331	2.77647	15.0331	2.68006	15.0321	2.62721	15.0323	2.6212	12.8847	2.71614	12.8857	2.73991	12.8832	2.78303	12.884	2.83651	12.885	2.75132	12.8845	2.54022
15.147	2.77616	15.1469	2.67951	15.146	2.62782	15.1462	2.62091	12.9823	2.71656	12.9833	2.74097	12.9808	2.78246	12.9816	2.83561	12.9826	2.7519	12.9822	2.54115
15.2609	2.77605	15.2608	2.67939	15.2599	2.62747	15.2601	2.62048	13.0799	2.71661	13.081	2.74217	13.0784	2.78194	13.0792	2.83461	13.0802	2.75284	13.0798	2.54239
15.3747	2.776	15.3747	2.67922	15.3737	2.6269	15.374	2.62017	13.1775	2.71702	13.1786	2.74323	13.176	2.7812	13.1768	2.83365	13.1778	2.75328	13.1774	2.54391
15.4886	2.77598	15.4886	2.67917	15.4876	2.62679	15.4878	2.62036	13.2752	2.71702	13.2762	2.74402	13.2736	2.78042	13.2744	2.83267	13.2754	2.75281	13.275	2.5454
15.6025	2.77588	15.6025	2.67906	15.6015	2.62617	15.6017	2.62046	13.3728	2.71706	13.3738	2.74489	13.3712	2.77971	13.372	2.83165	13.3731	2.75222	13.3726	2.54743
15.7164	2.77576	15.7164	2.67894	15.7154	2.6254	15.7156	2.62025	13.4704	2.71715	13.4714	2.74589	13.4688	2.77893	13.4696	2.83071	13.4707	2.75111	13.4702	2.54904
15.8303	2.77579	15.8303	2.67849	15.8293	2.62491	15.8295	2.61986	13.568	2.71739	13.5691	2.74645	13.5664	2.77845	13.5672	2.8297	13.5683	2.75041	13.5678	2.55082
15.9442	2.77534	15.9442	2.678	15.9431	2.62471	15.9434	2.61991	13.6656	2.71798	13.6667	2.74674	13.664	2.77812	13.6648	2.82867	13.6659	2.74948	13.6654	2.55353
16.0581	2.77458	16.058	2.67746	16.057	2.62365	16.0572	2.61999	13.7632	2.71828	13.7643	2.74641	13.7616	2.77763	13.7624	2.82816	13.7635	2.74798	13.763	2.55557
16.172	2.77407	16.1719	2.6766	16.1709	2.62299	16.1711	2.62022	13.8608	2.71891	13.8619	2.74551	13.8592	2.77707	13.8601	2.82779	13.8611	2.74655	13.8606	2.55789
16.2858	2.77319	16.2858	2.67587	16.2848	2.622	16.285	2.6206	13.9584	2.71968	13.9595	2.74452	13.9568	2.77647	13.9577	2.82723	13.9587	2.74531	13.9583	2.55985
16.3997	2.77227	16.3997	2.67497	16.3986	2.62115	16.3989	2.62109	14.056	2.72031	14.0571	2.74362	14.0544	2.776	14.0553	2.82687	14.0563	2.74403	14.0559	2.56158
16.5136	2.77139	16.5136	2.67426	16.5125	2.62032	16.5128	2.62139	14.1537	2.72056	14.1548	2.74284	14.152	2.77582	14.1529	2.82644	14.154	2.74283	14.1535	2.56318
16.6275	2.77065	16.6275	2.67359	16.6264	2.61964	16.6267	2.6218	14.2513	2.72051	14.2524	2.74193	14.2496	2.77575	14.2505	2.82633	14.2516	2.74146	14.2511	2.56458
16.7414	2.77016	16.7413	2.67333	16.7403	2.61906	16.7405	2.62241	14.3489	2.72001	14.35	2.7411	14.3472	2.77569	14.3481	2.82639	14.3492	2.74019	14.3487	2.56565
16.8553	2.76968	16.8552	2.67325	16.8542	2.61849	16.8544	2.62308	14.4465	2.71958	14.4476	2.74048	14.4448	2.77559	14.4457	2.82651	14.4468	2.73937	14.4463	2.56679
16.9691	2.76915	16.9691	2.67358	16.968	2.61812	16.9683	2.62366	14.5441	2.71923	14.5452	2.74005	14.5424	2.77593	14.5433	2.82676	14.5444	2.73802	14.5439	2.56766
17.083	2.76898	17.083	2.67359	17.0819	2.61756	17.0822	2.6238	14.6417	2.71888	14.6429	2.73992	14.64	2.7765	14.6409	2.82682	14.642	2.73738	14.6415	2.56815
17.1969	2.769	17.1969	2.67362	17.1958	2.61709	17.1961	2.62373	14.7393	2.71892	14.7405	2.73984	14.7376	2.77687	14.7385	2.8267	14.7396	2.73662	14.7391	2.56746
17.3108	2.76881	17.3108	2.6738	17.3097	2.61657	17.3099	2.62369	14.8369	2.71902	14.8381	2.73974	14.8352	2.77724	14.8361	2.82676	14.8372	2.73543	14.8367	2.56688
17.4247	2.76884	17.4247	2.67411	17.4236	2.61629	17.4238	2.62408	14.9346	2.71918	14.9357	2.73966	14.9328	2.77736	14.9337	2.82692	14.9349	2.73452	14.9344	2.56645
17.5386	2.76888	17.5385	2.67439	17.5374	2.61621	17.5377	2.62478	15.0322	2.71937	15.0333	2.73932	15.0304	2.77735	15.0313	2.82716	15.0325	2.73359	15.032	2.56571
17.6525	2.76903	17.6524	2.67469	17.6513	2.61647	17.6516	2.62543	15.1298	2.71936	15.131	2.73908	15.128	2.77741	15.1289	2.82751	15.1301	2.73292	15.1296	2.56487
17.7664	2.76921	17.7663	2.6748	17.7652	2.61631	17.7655	2.62567	15.2274	2.71947	15.2286	2.73891	15.2256	2.7774	15.2265	2.82802	15.2277	2.73281	15.2272	2.56437
17.8802	2.76944	17.8802	2.67509	17.8791	2.61616	17.8793	2.62583	15.325	2.71979	15.3262	2.73859	15.3231	2.77757	15.3241	2.82849	15.3253	2.7327	15.3248	2.56386
17.9941	2.77013	17.9941	2.67514	17.993	2.61619	17.9932	2.62635	15.4226	2.72001	15.4238	2.73811	15.4207	2.77798	15.4217	2.82901	15.4229	2.73249	15.4224	2.56343
18.108	2.77062	18.108	2.67506	18.1068	2.61613	18.1071	2.627	15.5202	2.72003	15.5214	2.73798	15.5183	2.77814	15.5194	2.82944	15.5205	2.73262	15.52	2.56309
18.2219	2.77142	18.2219	2.67531	18.2207	2.6157	18.221	2.62741	15.6178	2.71985	15.619	2.7379	15.6159	2.77811	15.617	2.83023	15.6181	2.73284	15.6176	2.56207
18.3358	2.77251	18.3358	2.67544	18.3346	2.61598	18.3349	2.62775	15.7154	2.71999	15.7167	2.73783	15.7135	2.77837	15.7146	2.83071	15.7158	2.73354	15.7152	2.56212
18.4497	2.77383	18.4496	2.67585	18.4485	2.616	18.4488	2.62742	15.8131	2.71987	15.8143	2.73825	15.8111	2.7786	15.8122	2.83105	15.8134	2.73467	15.8128	2.56217
18.5636	2.77527	18.5635	2.67639	18.5624	2.61623	18.5626	2.62684	15.9107	2.71959	15.9119	2.73871	15.9087	2.77908	15.9098	2.83154	15.911	2.73588	15.9105	2.56238
18.6775	2.77664	18.6774	2.67706	18.6762	2.61642	18.6765	2.62574	16.0083	2.71946	16.0095	2.73915	16.0063	2.77964	16.0074	2.83187	16.0086	2.73699	16.0081	2.56318
18.7913	2.77768	18.7913	2.67769	18.7901	2.61648	18.7904	2.62469	16.1059	2.71961	16.1071	2.73954	16.1039	2.77985	16.105	2.83225	16.1062	2.73793	16.1057	2.56347
18.9052	2.77829	18.9052	2.67842	18.904	2.61693	18.9043	2.62374	16.2035	2.71951	16.2048	2.74009	16.2016	2.78019	16.2026	2.83249	16.2038	2.73912	16.2033	2.56383
19.0191	2.77884	19.0191	2.67894	19.0179	2.61758	19.0182	2.62306	16.3011	2.71938	16.3024	2.74071	16.2992	2.78061	16.3002	2.83252	16.3014	2.7405	16.3009	2.56393
19.133	2.77909	19.133	2.6794	19.1318	2.61825	19.132	2.62239	16.3987	2.71924	16.4	2.74122	16.3968	2.78117	16.3978	2.83247	16.399	2.74155	16.3985	2.56388
19.2469	2.77944	19.2468	2.67946	19.2456	2.61862	19.2459	2.62189	16.4963	2.71903	16.4976	2.74163	16.4944	2.78147	16.4954	2.83231	16.4967	2.74312	16.4961	2.56397
19.3608	2.77947	19.3607	2.67967	19.3595	2.61937	19.3598	2.62148	16.594	2.71894	16.5952	2.74175	16.592	2.78172	16.593	2.83196	16.5943	2.74402	16.5937	2.56426
19.4746	2.77936	19.4746	2.68015	19.4734	2.62002	19.4737	2.62127	16.6916	2.71851	16.6928	2.74206	16.6896	2.78186	16.6906	2.83197	16.6919	2.74514	16.6913	2.56513
19.5885	2.77953	19.5885	2.68033	19.5873	2.62089	19.5876	2.62125	16.7892	2.71796	16.7905	2.74239	16.7872	2.78198	16.7882	2.83186	16.7895	2.74636	16.7889	2.56614
19.7024	2.77958	19.7024	2.68042	19.7012	2.62124	19.7014	2.62147	16.8868	2.71762	16.8881	2.74254	16.8848	2.78219	16.8858	2.83174	16.8871	2.74695	16.8866	2.56674
19.8163	2.77955	19.8163	2.68039	19.815	2.62166	19.8153	2.62162	16.9844	2.71725	16.9857	2.74305	16.9824	2.78263	16.9834	2.83137	16.9847	2.74752	16.9842	2.56689
19.9302	2.77944	19.9302	2.68046	19.9289	2.62191	19.9292	2.6216	17.082	2.71705	17.0833	2.7437	17.08	2.78289	17.081	2.83074	17.0823	2.74835	17.0818	2.5676
20.0441	2.77955	20.044	2.68098	20.0428	2.62174	20.0431	2.62183	17.1796	2.7172	17.1809	2.74454	17.1776	2.7831	17.1786	2.82986	17.1799	2.74908	17.1794	2.56789
20.158	2.77957	20.1579	2.68111	20.1567	2.6217	20.157	2.62229	17.2772	2.71718	17.2786	2.74554	17.2752	2.78311	17.2763	2.82916	17.2776	2.74976	17.277	2.5683
20.2718	2.77945	20.2718	2.68139	20.2706	2.62139	20.2708	2.62254	17.3748	2.71715	17.3762	2.7464	17.3728	2.78286	17.3739	2.82845	17.3752	2.75059	17.3746	2.56893
20.3857	2.77941	20.3857	2.68184	20.3844	2.62101	20.3847	2.62267	17.4725	2.71718	17.4738	2.74691	17.4704	2.78264	17.4715	2.82779	17.4728	2.75123	17.4722	2.56918
20.4996	2.77925	20.4996	2.68187	20.4983	2.62064	20.4986	2.62302	17.5701	2.71692	17.5714	2.74735	17.568	2.78243	17.5691	2.82678	17.5704	2.75162	17.5698	2.56923
20.6135	2.77907	20.6135	2.6817	20.6122	2.61957	20.6125	2.6234	17.6677	2.7164	17.669	2.7479	17.6656	2.78209	17.6667	2.82573	17.668	2.75185	17.6674	2.56817
20.7274	2.77851	20.7274	2.6813	20.7261	2.61823	20.7264	2.62414	17.7653	2.71586	17.7666	2.74814	17.7632	2.78189	17.7643	2.82481	17.7656	2.75177	17.765	2.56681
20.8413	2.77818	20.8412	2.68064	20.84	2.6168	20.8403	2.62457	17.8629	2.71536	17.8643	2.74829	17.8608	2.78175	17.8619	2.82394	17.8632	2.7518	17.8626	2.56553
20.9552	2.7781	20.9551	2.67981	20.9538	2.6155	20.9541	2.62554	17.9605	2.71501	17.9619	2.74782	17.9584	2.78124	17.9595	2.82315	17.9608	2.75202	17.9603	2.56395
21.0691	2.77799	21.069	2.67909	21.0677	2.61465	21.068	2.6267	18.0581	2.71457	18.0595	2.74719	18.0559	2.78111	18.0571	2.82252	18.0585	2.75218	18.0579	2.56247
21.1829	2.77809	21.1829	2.67813	21.1816	2.6139	21.1819	2.62758	18.1557	2.71436	18.1571	2.74643	18.1535	2.78091	18.1547	2.82191	18.1561	2.75207	18.1555	2.56077
21.2968	2.77828	21.2968	2.67748	21.2955	2.61265	21.2958	2.62784	18.2533	2.71428	18.2547	2.74551	18.2511	2.78061	18.2523	2.82138	18.2537	2.75211	18.2531	2.5595
21.4107	2.77854	21.4107	2.67691	21.4093	2.61149	21.4097	2.62805	18.351	2.71434	18.3524	2.74459	18.3487	2.78012	18.3499	2.82093	18.3513	2.75217	18.3507	2.55854
21.5246	2.77878	21.5246	2.67668	21.5232	2.61076	21.5236	2.62787	18.4486	2.71452	18.45	2.74359	18.4463	2.7798	18.4475	2.8205	18.4489	2.75193	18.4483	2.55764
21.6385	2.77919	21.6384	2.67627	21.6371	2.61003	21.6374	2.62786	18.5462	2.71481	18.5476	2.74268	18.5439	2.77967	18.5451	2.82071	18.5465	2.75181	18.5459	2.55681
21.7524	2.77928	21.7523	2.67596	21.751	2.60976	21.7513	2.62772	18.6438	2.7152	18.6452	2.74155	18.6415	2.77969	18.6427	2.82068	18.6441	2.75139	18.6435	2.55603
21.8663	2.77939	21.8662	2.67575	21.8649	2.60931	21.8652	2.62736	18.7414	2.71562	18.7428	2.74025	18.7391	2.77945	18.7403	2.82069	18.7417	2.75129	18.7411	2.55452
21.9801	2.77941	21.9801	2.67521	21.9787	2.60947	21.9791	2.62657	18.839	2.71583	18.8404	2.73895	18.8367	2.779	18.8379	2.82062	18.8394	2.75119	18.8387	2.55339
22.094	2.77922	22.094	2.6746	22.0926	2.60937	22.093	2.62578	18.9366	2.7158	18.9381	2.73772	18.9343	2.77851	18.9355	2.82093	18.937	2.75116	18.9364	2.55298
22.2079	2.77926	22.2079	2.67383	22.2065	2.609	22.2068	2.62506	19.0342	2.71554	19.0357	2.73639	19.0319	2.77811	19.0332	2.82145	19.0346	2.75098	19.034	2.55212
22.3218	2.77918	22.3218	2.67247	22.3204	2.60919	22.3207	2.62432	19.1319	2.71512	19.1333	2.73499	19.1295	2.77762	19.1308	2.8221	19.1322	2.75114	19.1316	2.55143
22.4357	2.77901	22.4356	2.67114	22.4343	2.60995	22.4346	2.62361	19.2295	2.71479	19.2309	2.73358	19.2271	2.77709	19.2284	2.82252	19.2298	2.7511	19.2292	2.55009
22.5496	2.77886	22.5495	2.66976	22.5482	2.61057	22.5485	2.62297	19.3271	2.71441	19.3285	2.73247	19.3247	2.77666	19.326	2.82294	19.3274	2.75102	19.3268	2.54833
22.6634	2.77875	22.6634	2.6682	22.662	2.61137	22.6624	2.62279	19.4247	2.71395	19.4262	2.73158	19.4223	2.77607	19.4236	2.82337	19.425	2.7509	19.4244	2.54755
22.7773	2.77845	22.7773	2.66714	22.7759	2.61245	22.7762	2.6224	19.5223	2.71369	19.5238	2.73124	19.5199	2.7754	19.5212	2.82379	19.5226	2.75106	19.522	2.54722
22.8912	2.77831	22.8912	2.6661	22.8898	2.61376	22.8901	2.62177	19.6199	2.71362	19.6214	2.73092	19.6176	2.77492	19.6188	2.82427	19.6203	2.7513	19.6196	2.54715
23.0051	2.77804	23.0051	2.66544	23.0037	2.6155	23.004	2.62108	19.7175	2.71375	19.719	2.73068	19.7152	2.77461	19.7164	2.82466	19.7179	2.75119	19.7172	2.54726
23.119	2.77756	23.119	2.6652	23.1175	2.61712	23.1179	2.62114	19.8151	2.7137	19.8166	2.73071	19.8128	2.77409	19.814	2.82513	19.8155	2.75125	19.8148	2.54688
23.2329	2.77696	23.2328	2.66527	23.2314	2.61899	23.2318	2.62102	19.9127	2.71374	19.9142	2.73148	19.9104	2.77385	19.9116	2.82558	19.9131	2.75091	19.9125	2.54629
23.3468	2.77678	23.3467	2.66537	23.3453	2.62048	23.3456	2.62084	20.0104	2.71368	20.0119	2.73258	20.008	2.77347	20.0092	2.82566	20.0107	2.7506	20.0101	2.54573
23.4607	2.77653	23.4606	2.6658	23.4592	2.62146	23.4595	2.62075	20.108	2.71343	20.1095	2.73354	20.1056	2.77278	20.1068	2.82558	20.1083	2.7506	20.1077	2.54531
23.5745	2.77635	23.5745	2.66607	23.5731	2.62239	23.5734	2.62086	20.2056	2.7133	20.2071	2.73461	20.2032	2.7724	20.2044	2.82569	20.2059	2.75047	20.2053	2.54509
23.6884	2.77634	23.6884	2.66625	23.6869	2.62338	23.6873	2.62098	20.3032	2.71306	20.3047	2.73565	20.3008	2.77218	20.302	2.82582	20.3035	2.75078	20.3029	2.54451
23.8023	2.77624	23.8023	2.66626	23.8008	2.62384	23.8012	2.62143	20.4008	2.7127	20.4023	2.73677	20.3984	2.77188	20.3996	2.82589	20.4012	2.75092	20.4005	2.54362
23.9162	2.77619	23.9162	2.66649	23.9147	2.62384	23.915	2.62172	20.4984	2.71221	20.5	2.73782	20.496	2.77162	20.4972	2.82543	20.4988	2.75121	20.4981	2.54259
24.0301	2.77638	24.03	2.66676	24.0286	2.62347	24.0289	2.62232	20.596	2.71155	20.5976	2.73913	20.5935	2.77105	20.5948	2.82504	20.5964	2.75159	20.5957	2.54155
24.144	2.77673	24.1439	2.66717	24.1425	2.62306	24.1428	2.6228	20.6936	2.71085	20.6952	2.74069	20.6911	2.77065	20.6925	2.82469	20.694	2.75209	20.6933	2.54133
24.2579	2.77686	24.2578	2.66788	24.2563	2.62243	24.2567	2.6232	20.7913	2.71014	20.7928	2.74229	20.7887	2.77045	20.7901	2.82447	20.7916	2.75266	20.7909	2.54122
24.3717	2.77713	24.3717	2.66858	24.3702	2.62204	24.3706	2.62339	20.8889	2.70945	20.8904	2.74366	20.8863	2.76995	20.8877	2.82395	20.8892	2.75332	20.8886	2.54068
24.4856	2.77672	24.4856	2.66922	24.4841	2.62194	24.4845	2.62373	20.9865	2.70912	20.988	2.74483	20.9839	2.76977	20.9853	2.82345	20.9868	2.75388	20.9862	2.54035
24.5995	2.77625	24.5995	2.67024	24.598	2.62186	24.5983	2.62397	21.0841	2.70918	21.0857	2.74612	21.0815	2.76999	21.0829	2.82293	21.0844	2.75372	21.0838	2.53993
24.7134	2.7759	24.7134	2.67124	24.7119	2.62127	24.7122	2.62427	21.1817	2.70907	21.1833	2.74717	21.1791	2.77036	21.1805	2.82238	21.1821	2.75369	21.1814	2.53936
24.8273	2.77546	24.8272	2.67237	24.8257	2.62121	24.8261	2.62468	21.2793	2.70891	21.2809	2.7479	21.2767	2.77082	21.2781	2.8218	21.2797	2.75335	21.279	2.53895
24.9412	2.77511	24.9411	2.67373	24.9396	2.62115	24.94	2.62449	21.3769	2.70899	21.3785	2.74827	21.3743	2.77166	21.3757	2.82138	21.3773	2.75327	21.3766	2.53769
25.0551	2.77492	25.055	2.67455	25.0535	2.62095	25.0539	2.62443	21.4745	2.70903	21.4761	2.74817	21.4719	2.77238	21.4733	2.82145	21.4749	2.75311	21.4742	2.53592
25.1689	2.77452	25.1689	2.67556	25.1674	2.62101	25.1678	2.62422	21.5721	2.70932	21.5737	2.74793	21.5695	2.77352	21.5709	2.8216	21.5725	2.75285	21.5718	2.53482
25.2828	2.77434	25.2828	2.67629	25.2813	2.62085	25.2816	2.62444	21.6698	2.70956	21.6714	2.74784	21.6671	2.77461	21.6685	2.82169	21.6701	2.75249	21.6694	2.53398
25.3967	2.77443	25.3967	2.67667	25.3951	2.62079	25.3955	2.62422	21.7674	2.71014	21.769	2.74768	21.7647	2.77586	21.7661	2.8215	21.7677	2.75213	21.767	2.53327
25.5106	2.77464	25.5105	2.67698	25.509	2.62024	25.5094	2.6238	21.865	2.71075	21.8666	2.7471	21.8623	2.77728	21.8637	2.82139	21.8653	2.75201	21.8646	2.53296
25.6245	2.77485	25.6244	2.67691	25.6229	2.61992	25.6233	2.62312	21.9626	2.71113	21.9642	2.74659	21.9599	2.77846	21.9613	2.82166	21.963	2.752	21.9623	2.53301
25.7384	2.77526	25.7383	2.67662	25.7368	2.61973	25.7372	2.62254	22.0602	2.71147	22.0618	2.74604	22.0575	2.77977	22.0589	2.82227	22.0606	2.75167	22.0599	2.53373
25.8522	2.77542	25.8522	2.67639	25.8507	2.61975	25.851	2.62179	22.1578	2.71209	22.1595	2.74549	22.1551	2.78084	22.1565	2.82282	22.1582	2.75133	22.1575	2.53447
25.9661	2.77537	25.9661	2.67621	25.9645	2.61945	25.9649	2.62089	22.2554	2.71277	22.2571	2.74504	22.2527	2.78173	22.2541	2.82321	22.2558	2.75062	22.2551	2.53579
26.08	2.77534	26.08	2.6761	26.0784	2.61916	26.0788	2.61974	22.353	2.71329	22.3547	2.74466	22.3503	2.78234	22.3517	2.82357	22.3534	2.7502	22.3527	2.53729
26.1939	2.7749	26.1939	2.67599	26.1923	2.61915	26.1927	2.61884	22.4507	2.71363	22.4523	2.7442	22.4479	2.78309	22.4494	2.82405	22.451	2.74982	22.4503	2.53934
26.3078	2.77449	26.3078	2.67616	26.3062	2.61877	26.3066	2.61789	22.5483	2.71389	22.5499	2.74342	22.5456	2.78383	22.547	2.82449	22.5486	2.74994	22.5479	2.54103
26.4217	2.77389	26.4216	2.67594	26.4201	2.61815	26.4204	2.61687	22.6459	2.71403	22.6476	2.74246	22.6432	2.78429	22.6446	2.82496	22.6462	2.74976	22.6455	2.54215
26.5356	2.77348	26.5355	2.67581	26.5339	2.61751	26.5343	2.61606	22.7435	2.71417	22.7452	2.74126	22.7408	2.78461	22.7422	2.82558	22.7439	2.74926	22.7431	2.54339
26.6494	2.77315	26.6494	2.67593	26.6478	2.61704	26.6482	2.61552	22.8411	2.71435	22.8428	2.74022	22.8384	2.78515	22.8398	2.82615	22.8415	2.74869	22.8407	2.54454
26.7633	2.77325	26.7633	2.67644	26.7617	2.6164	26.7621	2.61493	22.9387	2.71475	22.9404	2.73911	22.936	2.78537	22.9374	2.82645	22.9391	2.74812	22.9383	2.54511
26.8772	2.77337	26.8772	2.67652	26.8756	2.61558	26.876	2.61415	23.0363	2.71471	23.038	2.73802	23.0336	2.78544	23.035	2.82668	23.0367	2.74797	23.036	2.54565
26.9911	2.77346	26.9911	2.67663	26.9895	2.61486	26.9898	2.6135	23.1339	2.71451	23.1356	2.73733	23.1312	2.78562	23.1326	2.82679	23.1343	2.74754	23.1336	2.54695
27.105	2.77381	27.105	2.67647	27.1033	2.61411	27.1037	2.61278	23.2315	2.71467	23.2333	2.73682	23.2287	2.78592	23.2302	2.82709	23.2319	2.74778	23.2312	2.54803
27.2189	2.77407	27.2188	2.67606	27.2172	2.61323	27.2176	2.61225	23.3291	2.71448	23.3309	2.7367	23.3263	2.78615	23.3278	2.82731	23.3295	2.74755	23.3288	2.54952
27.3328	2.77466	27.3327	2.67597	27.3311	2.61235	27.3315	2.61155	23.4268	2.71468	23.4285	2.7368	23.4239	2.78633	23.4254	2.82691	23.4271	2.74713	23.4264	2.55135
27.4466	2.77536	27.4466	2.67524	27.445	2.61184	27.4454	2.61119	23.5244	2.71473	23.5261	2.73733	23.5215	2.78594	23.523	2.82636	23.5247	2.74679	23.524	2.5524
27.5605	2.77596	27.5605	2.67496	27.5589	2.61198	27.5593	2.61054	23.622	2.71479	23.6237	2.73783	23.6191	2.78553	23.6206	2.82598	23.6224	2.74675	23.6216	2.55305
27.6744	2.77643	27.6744	2.67465	27.6727	2.6122	27.6731	2.61019	23.7196	2.71481	23.7214	2.73849	23.7167	2.78524	23.7182	2.82549	23.72	2.74662	23.7192	2.5541
27.7883	2.77685	27.7883	2.67443	27.7866	2.61224	27.787	2.60994	23.8172	2.7147	23.819	2.73939	23.8143	2.78509	23.8158	2.82511	23.8176	2.74632	23.8168	2.55507
27.9022	2.777	27.9022	2.67428	27.9005	2.6121	27.9009	2.61009	23.9148	2.71453	23.9166	2.74005	23.9119	2.78499	23.9134	2.82449	23.9152	2.74581	23.9144	2.55596
28.0161	2.77693	28.016	2.67442	28.0144	2.61209	28.0148	2.61038	24.0124	2.71444	24.0142	2.74067	24.0095	2.78488	24.011	2.8237	24.0128	2.74538	24.012	2.55594
28.13	2.7771	28.1299	2.67459	28.1283	2.61223	28.1287	2.61077	24.11	2.71392	24.1118	2.74118	24.1071	2.78457	24.1086	2.82291	24.1104	2.74494	24.1097	2.55523
28.2439	2.77721	28.2438	2.67451	28.2421	2.61239	28.2425	2.61147	24.2077	2.71327	24.2094	2.74167	24.2047	2.78432	24.2063	2.82212	24.208	2.74419	24.2073	2.55407
28.3577	2.7774	28.3577	2.67437	28.356	2.61284	28.3564	2.6127	24.3053	2.71307	24.3071	2.74173	24.3023	2.78415	24.3039	2.82133	24.3056	2.74349	24.3049	2.55274
28.4716	2.77801	28.4716	2.67421	28.4699	2.61317	28.4703	2.61388	24.4029	2.71305	24.4047	2.74189	24.3999	2.78387	24.4015	2.82086	24.4033	2.74264	24.4025	2.55078
28.5855	2.7785	28.5855	2.67358	28.5838	2.61389	28.5842	2.61511	24.5005	2.71302	24.5023	2.74188	24.4975	2.78402	24.4991	2.82056	24.5009	2.74137	24.5001	2.54926
28.6994	2.77908	28.6993	2.67319	28.6976	2.61441	28.6981	2.61663	24.5981	2.71314	24.5999	2.74173	24.5951	2.78414	24.5967	2.82008	24.5985	2.73987	24.5977	2.54809
28.8133	2.77953	28.8132	2.67291	28.8115	2.61505	28.8119	2.61823	24.6957	2.71324	24.6975	2.74161	24.6927	2.78435	24.6943	2.81944	24.6961	2.73908	24.6953	2.54637
28.9272	2.77982	28.9271	2.67247	28.9254	2.61585	28.9258	2.61967	24.7933	2.71369	24.7951	2.74133	24.7903	2.78398	24.7919	2.81875	24.7937	2.7383	24.7929	2.5448
29.041	2.78008	29.041	2.67182	29.0393	2.61675	29.0397	2.62084	24.8909	2.7139	24.8928	2.74148	24.8879	2.78375	24.8895	2.81847	24.8913	2.73772	24.8905	2.54386
29.1549	2.78052	29.1549	2.67165	29.1532	2.61762	29.1536	2.62209	24.9885	2.71417	24.9904	2.74163	24.9855	2.78346	24.9871	2.81838	24.9889	2.73741	24.9881	2.54299
29.2688	2.78098	29.2688	2.67169	29.2671	2.61831	29.2675	2.62295	25.0862	2.71451	25.088	2.7416	25.0831	2.78285	25.0847	2.8188	25.0865	2.73773	25.0858	2.54166
29.3827	2.78107	29.3827	2.67221	29.3809	2.61891	29.3814	2.62373	25.1838	2.71451	25.1856	2.74171	25.1808	2.78201	25.1823	2.81898	25.1842	2.73759	25.1834	2.54039
29.4966	2.78113	29.4965	2.67302	29.4948	2.6195	29.4952	2.62429	25.2814	2.71482	25.2832	2.74196	25.2784	2.78113	25.2799	2.8191	25.2818	2.73743	25.281	2.53935
29.6105	2.7807	29.6104	2.6737	29.6087	2.62013	29.6091	2.62474	25.379	2.7149	25.3809	2.74212	25.376	2.78039	25.3775	2.81947	25.3794	2.73752	25.3786	2.53842
29.7244	2.78032	29.7243	2.67484	29.7226	2.61984	29.723	2.62487	25.4766	2.71508	25.4785	2.74207	25.4736	2.7797	25.4751	2.8198	25.477	2.73751	25.4762	2.53786
29.8382	2.78005	29.8382	2.67543	29.8365	2.61928	29.8369	2.6252	25.5742	2.71504	25.5761	2.74216	25.5712	2.77887	25.5727	2.82018	25.5746	2.73801	25.5738	2.53777
29.9521	2.7799	29.9521	2.67573	29.9503	2.61846	29.9508	2.62493	25.6718	2.7148	25.6737	2.74215	25.6688	2.77803	25.6703	2.82085	25.6722	2.73813	25.6714	2.53731
30.066	2.77983	30.066	2.67584	30.0642	2.61792	30.0646	2.62472	25.7694	2.71458	25.7713	2.74201	25.7664	2.77718	25.7679	2.82153	25.7698	2.73834	25.769	2.53675
30.1799	2.77966	30.1799	2.67637	30.1781	2.61743	30.1785	2.62452	25.8671	2.71445	25.8689	2.7416	25.8639	2.77628	25.8655	2.82222	25.8674	2.73876	25.8666	2.53606
30.2938	2.77946	30.2937	2.67634	30.292	2.61731	30.2924	2.62416	25.9647	2.71444	25.9666	2.74153	25.9615	2.77539	25.9632	2.82274	25.965	2.73919	25.9642	2.53589
30.4077	2.77897	30.4076	2.67609	30.4058	2.61699	30.4063	2.62412	26.0623	2.71461	26.0642	2.74157	26.0591	2.77479	26.0608	2.82319	26.0627	2.73936	26.0619	2.53668
30.5216	2.77897	30.5215	2.67637	30.5197	2.61685	30.5202	2.62392	26.1599	2.71498	26.1618	2.74142	26.1567	2.77412	26.1584	2.82388	26.1603	2.73966	26.1595	2.53696
30.6354	2.7789	30.6354	2.67652	30.6336	2.61669	30.634	2.62339	26.2575	2.71487	26.2594	2.74181	26.2543	2.77341	26.256	2.82455	26.2579	2.73997	26.2571	2.53727
30.7493	2.77859	30.7493	2.67638	30.7475	2.61655	30.7479	2.6228	26.3551	2.71447	26.357	2.74226	26.3519	2.77263	26.3536	2.82508	26.3555	2.74049	26.3547	2.53769
30.8632	2.77839	30.8632	2.67672	30.8614	2.6165	30.8618	2.62216	26.4527	2.71423	26.4546	2.743	26.4495	2.77163	26.4512	2.82553	26.4531	2.74079	26.4523	2.53767
30.9771	2.77804	30.9771	2.67739	30.9752	2.61682	30.9757	2.62133	26.5503	2.71403	26.5523	2.74407	26.5471	2.77089	26.5488	2.82609	26.5507	2.74123	26.5499	2.53733
31.091	2.77781	31.0909	2.67792	31.0891	2.61707	31.0896	2.62058	26.6479	2.71372	26.6499	2.74517	26.6447	2.77004	26.6464	2.82678	26.6483	2.74142	26.6475	2.5376
31.2049	2.77762	31.2048	2.67816	31.203	2.61707	31.2035	2.61991	26.7456	2.71281	26.7475	2.74635	26.7423	2.76939	26.744	2.82754	26.7459	2.74166	26.7451	2.53787
31.3188	2.77773	31.3187	2.67824	31.3169	2.61711	31.3173	2.61919	26.8432	2.71185	26.8451	2.74739	26.8399	2.76883	26.8416	2.82797	26.8436	2.7415	26.8427	2.53799
31.4326	2.7775	31.4326	2.67814	31.4308	2.61706	31.4312	2.61866	26.9408	2.71084	26.9427	2.74773	26.9375	2.76827	26.9392	2.82843	26.9412	2.74099	26.9403	2.53789
31.5465	2.77747	31.5465	2.6779	31.5446	2.61737	31.5451	2.61825	27.0384	2.70997	27.0404	2.74793	27.0351	2.76789	27.0368	2.8283	27.0388	2.74007	27.0379	2.53796
31.6604	2.77732	31.6604	2.67715	31.6585	2.61733	31.659	2.61793	27.136	2.70917	27.138	2.74803	27.1327	2.76763	27.1344	2.82825	27.1364	2.73937	27.1356	2.53896
31.7743	2.77727	31.7743	2.67645	31.7724	2.61752	31.7729	2.61807	27.2336	2.70855	27.2356	2.74751	27.2303	2.7674	27.232	2.82813	27.234	2.73893	27.2332	2.54016
31.8882	2.77736	31.8881	2.67633	31.8863	2.61777	31.8867	2.61879	27.3312	2.708	27.3332	2.74715	27.3279	2.76722	27.3296	2.82774	27.3316	2.73857	27.3308	2.54127
32.0021	2.77727	32.002	2.67583	32.0002	2.61854	32.0006	2.6196	27.4288	2.70704	27.4308	2.74677	27.4255	2.7671	27.4272	2.82733	27.4292	2.73867	27.4284	2.54252
32.1159	2.77712	32.1159	2.67509	32.114	2.61917	32.1145	2.62018	27.5265	2.70629	27.5284	2.746	27.5232	2.7671	27.5248	2.82679	27.5268	2.73833	27.526	2.54341
32.2298	2.77672	32.2298	2.67459	32.2279	2.62024	32.2284	2.62121	27.6241	2.70563	27.6261	2.74541	27.6208	2.76674	27.6224	2.82597	27.6244	2.73818	27.6236	2.54417
32.3437	2.77613	32.3437	2.67432	32.3418	2.62125	32.3423	2.62216	27.7217	2.70517	27.7237	2.74495	27.7184	2.76634	27.7201	2.82518	27.7221	2.73824	27.7212	2.54509
32.4576	2.77565	32.4576	2.67378	32.4557	2.62236	32.4561	2.62316	27.8193	2.70508	27.8213	2.74507	27.816	2.76623	27.8177	2.82453	27.8197	2.7383	27.8188	2.54582
32.5715	2.77533	32.5714	2.67394	32.5696	2.62292	32.57	2.6241	27.9169	2.70519	27.9189	2.74542	27.9136	2.76627	27.9153	2.82392	27.9173	2.73854	27.9164	2.5465
32.6854	2.77503	32.6853	2.67436	32.6834	2.62316	32.6839	2.62465	28.0145	2.70526	28.0165	2.74562	28.0112	2.76626	28.0129	2.82343	28.0149	2.73905	28.014	2.54679
32.7993	2.77465	32.7992	2.67417	32.7973	2.62337	32.7978	2.62527	28.1121	2.70513	28.1141	2.74586	28.1088	2.76605	28.1105	2.82285	28.1125	2.73983	28.1117	2.54698
32.9131	2.77419	32.9131	2.67409	32.9112	2.62331	32.9117	2.6258	28.2097	2.70516	28.2118	2.74603	28.2064	2.76609	28.2081	2.82242	28.2101	2.74049	28.2093	2.54678
33.027	2.77386	33.027	2.67395	33.0251	2.6229	33.0256	2.62585	28.3074	2.70539	28.3094	2.7459	28.3039	2.76609	28.3057	2.82194	28.3077	2.74074	28.3069	2.54675
33.1409	2.77344	33.1409	2.67371	33.139	2.62229	33.1394	2.62578	28.405	2.70596	28.407	2.74568	28.4015	2.7661	28.4033	2.82124	28.4053	2.74075	28.4045	2.54715
33.2548	2.77306	33.2548	2.67311	33.2528	2.62168	33.2533	2.62576	28.5026	2.70638	28.5046	2.74547	28.4991	2.76618	28.5009	2.82061	28.503	2.74055	28.5021	2.54815
33.3687	2.77279	33.3686	2.67262	33.3667	2.62099	33.3672	2.62539	28.6002	2.70689	28.6022	2.74505	28.5967	2.76641	28.5985	2.81973	28.6006	2.74041	28.5997	2.54879
33.4826	2.77277	33.4825	2.67248	33.4806	2.62024	33.4811	2.62501	28.6978	2.70789	28.6999	2.74451	28.6943	2.76691	28.6961	2.81866	28.6982	2.74029	28.6973	2.54944
33.5965	2.77229	33.5964	2.67247	33.5945	2.61917	33.595	2.62511	28.7954	2.70908	28.7975	2.74371	28.7919	2.76738	28.7937	2.81773	28.7958	2.74078	28.7949	2.55038
33.7103	2.77209	33.7103	2.67256	33.7084	2.61826	33.7088	2.62534	28.893	2.71016	28.8951	2.74332	28.8895	2.76792	28.8913	2.81674	28.8934	2.74128	28.8925	2.55172
33.8242	2.77199	33.8242	2.67247	33.8222	2.61731	33.8227	2.62556	28.9906	2.71102	28.9927	2.74315	28.9871	2.76852	28.9889	2.81624	28.991	2.74202	28.9901	2.55287
33.9381	2.77179	33.9381	2.67282	33.9361	2.61666	33.9366	2.62597	29.0882	2.71178	29.0903	2.74296	29.0847	2.76945	29.0865	2.8156	29.0886	2.74281	29.0877	2.55387
34.052	2.77166	34.052	2.67315	34.05	2.61608	34.0505	2.62583	29.1859	2.71227	29.1879	2.74304	29.1823	2.77043	29.1841	2.81505	29.1862	2.74333	29.1854	2.55427
34.1659	2.77172	34.1658	2.67311	34.1639	2.61571	34.1644	2.62549	29.2835	2.7127	29.2856	2.7429	29.2799	2.77125	29.2817	2.8147	29.2838	2.74396	29.283	2.55428
34.2798	2.77207	34.2797	2.67356	34.2778	2.61544	34.2783	2.62525	29.3811	2.71315	29.3832	2.74259	29.3775	2.77227	29.3793	2.81477	29.3815	2.74447	29.3806	2.55393
34.3936	2.77247	34.3936	2.67457	34.3916	2.6151	34.3921	2.62513	29.4787	2.71379	29.4808	2.7423	29.4751	2.77311	29.477	2.8148	29.4791	2.74539	29.4782	2.55348
34.5075	2.77281	34.5075	2.67553	34.5055	2.61456	34.506	2.62466	29.5763	2.71475	29.5784	2.74205	29.5727	2.77418	29.5746	2.81519	29.5767	2.74629	29.5758	2.55329
34.6214	2.77305	34.6214	2.67651	34.6194	2.6141	34.6199	2.62425	29.6739	2.71517	29.676	2.74192	29.6703	2.77502	29.6722	2.81553	29.6743	2.7469	29.6734	2.55321
34.7353	2.77351	34.7353	2.67732	34.7333	2.6139	34.7338	2.62356	29.7715	2.71523	29.7736	2.74136	29.768	2.77575	29.7698	2.81561	29.7719	2.74759	29.771	2.55286
34.8492	2.77384	34.8491	2.67752	34.8472	2.61413	34.8477	2.62285	29.8691	2.71498	29.8713	2.74062	29.8656	2.77626	29.8674	2.81577	29.8695	2.74811	29.8686	2.55215
34.9631	2.77396	34.963	2.67774	34.961	2.61464	34.9615	2.62265	29.9668	2.71493	29.9689	2.73988	29.9632	2.77664	29.965	2.81569	29.9671	2.74857	29.9662	2.55176
35.077	2.77402	35.0769	2.67802	35.0749	2.61501	35.0754	2.62236	30.0644	2.71488	30.0665	2.73934	30.0608	2.77719	30.0626	2.81574	30.0647	2.74899	30.0638	2.55186
35.1908	2.77419	35.1908	2.67839	35.1888	2.61558	35.1893	2.6223	30.162	2.71471	30.1641	2.73893	30.1584	2.77761	30.1602	2.81565	30.1624	2.74948	30.1615	2.55247
35.3047	2.77429	35.3047	2.67905	35.3027	2.61642	35.3032	2.62264	30.2596	2.71463	30.2617	2.73894	30.256	2.7781	30.2578	2.81574	30.26	2.75017	30.2591	2.55333
35.4186	2.77432	35.4186	2.67946	35.4166	2.61722	35.4171	2.62307	30.3572	2.71414	30.3594	2.73902	30.3536	2.77839	30.3554	2.81595	30.3576	2.75111	30.3567	2.55418
35.5325	2.77449	35.5325	2.6802	35.5304	2.61796	35.5309	2.62345	30.4548	2.71364	30.457	2.73904	30.4512	2.77844	30.453	2.81609	30.4552	2.75213	30.4543	2.55511
35.6464	2.7748	35.6463	2.68079	35.6443	2.61861	35.6448	2.62423	30.5524	2.71298	30.5546	2.7393	30.5488	2.77829	30.5506	2.81627	30.5528	2.753	30.5519	2.5559
35.7603	2.77494	35.7602	2.68107	35.7582	2.61944	35.7587	2.62495	30.65	2.71246	30.6522	2.7393	30.6464	2.77821	30.6482	2.81665	30.6504	2.75367	30.6495	2.5563
35.8742	2.77506	35.8741	2.68168	35.8721	2.62032	35.8726	2.62551	30.7476	2.71159	30.7498	2.73964	30.744	2.77789	30.7458	2.81712	30.748	2.75355	30.7471	2.5564
35.988	2.77513	35.988	2.68226	35.986	2.62125	35.9865	2.626	30.8453	2.71108	30.8474	2.73989	30.8416	2.77764	30.8434	2.81764	30.8456	2.75364	30.8447	2.55659
36.1019	2.77503	36.1019	2.68302	36.0998	2.62213	36.1003	2.62605	30.9429	2.71088	30.9451	2.7398	30.9392	2.77746	30.941	2.8179	30.9432	2.75366	30.9423	2.55648
36.2158	2.77509	36.2158	2.68398	36.2137	2.62333	36.2142	2.62567	31.0405	2.71083	31.0427	2.73984	31.0367	2.77705	31.0386	2.81827	31.0409	2.75357	31.0399	2.55585
36.3297	2.77479	36.3297	2.6844	36.3276	2.62393	36.3281	2.62575	31.1381	2.71078	31.1403	2.73997	31.1343	2.77651	31.1362	2.81858	31.1385	2.75396	31.1375	2.55523
36.4436	2.77438	36.4435	2.68482	36.4415	2.62441	36.442	2.62533	31.2357	2.71078	31.2379	2.74019	31.2319	2.77599	31.2338	2.81891	31.2361	2.75406	31.2352	2.55489
36.5575	2.77374	36.5574	2.68519	36.5554	2.62488	36.5559	2.62494	31.3333	2.71109	31.3355	2.74063	31.3295	2.77547	31.3315	2.81895	31.3337	2.75416	31.3328	2.55422
36.6713	2.77293	36.6713	2.68538	36.6692	2.62525	36.6698	2.62464	31.4309	2.71124	31.4331	2.74109	31.4271	2.77538	31.4291	2.819	31.4313	2.75414	31.4304	2.55307
36.7852	2.77207	36.7852	2.68566	36.7831	2.62557	36.7836	2.62448	31.5285	2.71095	31.5308	2.74122	31.5247	2.77531	31.5267	2.81866	31.5289	2.75428	31.528	2.55225
36.8991	2.77133	36.8991	2.6856	36.897	2.62546	36.8975	2.62445	31.6262	2.71078	31.6284	2.74116	31.6223	2.7752	31.6243	2.81839	31.6265	2.75458	31.6256	2.55139
37.013	2.77072	37.013	2.68538	37.0109	2.62532	37.0114	2.62442	31.7238	2.71126	31.726	2.74118	31.7199	2.77546	31.7219	2.81834	31.7241	2.75497	31.7232	2.55101
37.1269	2.77017	37.1268	2.68555	37.1248	2.62481	37.1253	2.62427	31.8214	2.71175	31.8236	2.74098	31.8176	2.77581	31.8195	2.81822	31.8217	2.7553	31.8208	2.55079
37.2408	2.77011	37.2407	2.68547	37.2386	2.6239	37.2392	2.62386	31.919	2.71178	31.9212	2.74082	31.9152	2.77608	31.9171	2.81826	31.9194	2.75562	31.9184	2.54972
37.3547	2.7701	37.3546	2.68525	37.3525	2.62316	37.353	2.62386	32.0166	2.71189	32.0188	2.74054	32.0128	2.77637	32.0147	2.81799	32.017	2.75552	32.016	2.54863
37.4685	2.77007	37.4685	2.68511	37.4664	2.62282	37.4669	2.6232	32.1142	2.71224	32.1165	2.73978	32.1104	2.77684	32.1123	2.81797	32.1146	2.7554	32.1136	2.54773
37.5824	2.76999	37.5824	2.68455	37.5803	2.62258	37.5808	2.62284	32.2118	2.71247	32.2141	2.73865	32.208	2.77726	32.2099	2.81767	32.2122	2.75498	32.2112	2.54675
37.6963	2.77016	37.6963	2.68352	37.6942	2.62214	37.6947	2.62234	32.3094	2.71275	32.3117	2.73748	32.3056	2.77777	32.3075	2.8174	32.3098	2.75451	32.3089	2.54591
37.8102	2.77041	37.8102	2.6823	37.808	2.62214	37.8086	2.62164	32.4071	2.71301	32.4093	2.73633	32.4032	2.77828	32.4051	2.81744	32.4074	2.75432	32.4065	2.54437
37.9241	2.77058	37.924	2.6812	37.9219	2.6221	37.9225	2.62089	32.5047	2.71354	32.5069	2.73512	32.5008	2.77901	32.5027	2.81775	32.505	2.75427	32.5041	2.54285
38.038	2.77095	38.0379	2.68065	38.0358	2.62215	38.0363	2.62	32.6023	2.7138	32.6046	2.73407	32.5984	2.77964	32.6003	2.81803	32.6026	2.75446	32.6017	2.5415
38.1519	2.77123	38.1518	2.67994	38.1497	2.62214	38.1502	2.61907	32.6999	2.71376	32.7022	2.73277	32.696	2.77999	32.6979	2.81821	32.7003	2.75487	32.6993	2.54036
38.2657	2.77161	38.2657	2.67892	38.2636	2.62195	38.2641	2.61813	32.7975	2.71343	32.7998	2.73192	32.7936	2.77999	32.7955	2.81835	32.7979	2.75498	32.7969	2.53869
38.3796	2.77165	38.3796	2.67823	38.3774	2.62196	38.378	2.6177	32.8951	2.71302	32.8974	2.73158	32.8912	2.78006	32.8931	2.8185	32.8955	2.75495	32.8945	2.53775
38.4935	2.77181	38.4935	2.67729	38.4913	2.62141	38.4919	2.61736	32.9927	2.71268	32.995	2.73088	32.9888	2.78	32.9907	2.81859	32.9931	2.7549	32.9921	2.53671
38.6074	2.7723	38.6073	2.67667	38.6052	2.6209	38.6057	2.61747	33.0903	2.71216	33.0926	2.73009	33.0864	2.77975	33.0884	2.81867	33.0907	2.75412	33.0897	2.53555
38.7213	2.77289	38.7212	2.67622	38.7191	2.62004	38.7196	2.61786	33.1879	2.71154	33.1903	2.72953	33.184	2.77966	33.186	2.81886	33.1883	2.75382	33.1873	2.53439
38.8352	2.77341	38.8351	2.67599	38.833	2.61923	38.8335	2.61824	33.2856	2.71079	33.2879	2.72864	33.2816	2.77936	33.2836	2.81896	33.2859	2.75324	33.285	2.53347
38.9491	2.77375	38.949	2.67563	38.9468	2.61828	38.9474	2.61848	33.3832	2.71009	33.3855	2.72801	33.3792	2.77864	33.3812	2.81906	33.3835	2.75223	33.3826	2.53367
39.0629	2.77408	39.0629	2.6752	39.0607	2.61747	39.0613	2.61856	33.4808	2.70945	33.4831	2.72756	33.4768	2.77793	33.4788	2.81939	33.4811	2.75103	33.4802	2.5333
39.1768	2.7743	39.1768	2.67448	39.1746	2.61683	39.1751	2.61869	33.5784	2.70907	33.5807	2.72741	33.5744	2.77722	33.5764	2.8195	33.5788	2.74954	33.5778	2.5327
39.2907	2.77419	39.2907	2.6739	39.2885	2.61606	39.289	2.61896	33.676	2.70831	33.6783	2.72743	33.672	2.77623	33.674	2.81948	33.6764	2.74801	33.6754	2.53148
39.4046	2.77397	39.4045	2.67308	39.4024	2.61545	39.4029	2.61913	33.7736	2.70764	33.776	2.72745	33.7696	2.77549	33.7716	2.81946	33.774	2.74654	33.773	2.53015
39.5185	2.77375	39.5184	2.67207	39.5162	2.61515	39.5168	2.6192	33.8712	2.70737	33.8736	2.72757	33.8672	2.77487	33.8692	2.81947	33.8716	2.74514	33.8706	2.52921
39.6324	2.77322	39.6323	2.67129	39.6301	2.61479	39.6307	2.61884	33.9688	2.7073	33.9712	2.72777	33.9648	2.77413	33.9668	2.81972	33.9692	2.74435	33.9682	2.52838
39.7462	2.77277	39.7462	2.67045	39.744	2.61404	39.7446	2.61882	34.0665	2.70729	34.0688	2.72819	34.0624	2.77333	34.0644	2.8199	34.0668	2.74368	34.0658	2.52769
39.8601	2.77229	39.8601	2.66961	39.8579	2.61344	39.8584	2.61836	34.1641	2.70746	34.1664	2.72877	34.16	2.77267	34.162	2.82022	34.1644	2.74293	34.1634	2.52658
39.974	2.7718	39.974	2.66911	39.9717	2.61317	39.9723	2.61789	34.2617	2.70751	34.264	2.72955	34.2576	2.77221	34.2596	2.82053	34.262	2.74252	34.261	2.52525
40.0879	2.77161	40.0879	2.66848	40.0856	2.61263	40.0862	2.61767	34.3593	2.70788	34.3617	2.73021	34.3552	2.77199	34.3572	2.82049	34.3596	2.74191	34.3587	2.52425
40.2018	2.77148	40.2017	2.66774	40.1995	2.61235	40.2001	2.61749	34.4569	2.70819	34.4593	2.73107	34.4528	2.7717	34.4548	2.82004	34.4573	2.74107	34.4563	2.52377
40.3157	2.7712	40.3156	2.66707	40.3134	2.61218	40.314	2.61724	34.5545	2.70861	34.5569	2.73182	34.5504	2.77181	34.5524	2.81952	34.5549	2.7401	34.5539	2.52308
40.4295	2.77146	40.4295	2.66623	40.4273	2.61203	40.4278	2.61677	34.6521	2.70939	34.6545	2.73266	34.648	2.77239	34.65	2.819	34.6525	2.73931	34.6515	2.5225
40.5434	2.77158	40.5434	2.66583	40.5412	2.61246	40.5417	2.61607	34.7497	2.71019	34.7521	2.73303	34.7456	2.77306	34.7476	2.8185	34.7501	2.7388	34.7491	2.52255
40.6573	2.77193	40.6573	2.66498	40.655	2.61258	40.6556	2.61535	34.8473	2.71065	34.8497	2.73307	34.8432	2.77353	34.8453	2.81812	34.8477	2.7384	34.8467	2.52257
40.7712	2.7724	40.7712	2.66398	40.7689	2.61264	40.7695	2.61453	34.9449	2.711	34.9474	2.7334	34.9408	2.7742	34.9429	2.81783	34.9453	2.73787	34.9443	2.52287
40.8851	2.77262	40.8851	2.66282	40.8828	2.61308	40.8834	2.61304	35.0426	2.71125	35.045	2.73373	35.0384	2.77513	35.0405	2.81758	35.0429	2.73799	35.0419	2.52303
40.999	2.77286	40.9989	2.66183	40.9967	2.61364	40.9973	2.61185	35.1402	2.7114	35.1426	2.73354	35.136	2.77585	35.1381	2.81747	35.1405	2.73808	35.1395	2.52311
41.1128	2.7731	41.1128	2.66049	41.1106	2.61356	41.1111	2.61067	35.2378	2.71183	35.2402	2.73369	35.2336	2.77658	35.2357	2.81743	35.2381	2.7384	35.2371	2.52365
41.2267	2.77332	41.2267	2.65952	41.2244	2.61387	41.225	2.60954	35.3354	2.71193	35.3378	2.73366	35.3312	2.77738	35.3333	2.81754	35.3358	2.73908	35.3347	2.5233
41.3406	2.77338	41.3406	2.65881	41.3383	2.61385	41.3389	2.60879	35.433	2.71216	35.4355	2.73328	35.4288	2.77797	35.4309	2.81769	35.4334	2.7398	35.4324	2.52335
41.4545	2.77379	41.4545	2.6584	41.4522	2.6136	41.4528	2.60781	35.5306	2.71203	35.5331	2.73278	35.5264	2.77848	35.5285	2.81811	35.531	2.74113	35.53	2.524
41.5684	2.77422	41.5684	2.65812	41.5661	2.61354	41.5667	2.60705	35.6282	2.71192	35.6307	2.73227	35.624	2.77891	35.6261	2.81865	35.6286	2.74243	35.6276	2.52538
41.6823	2.77494	41.6822	2.65766	41.6799	2.61322	41.6805	2.60679	35.7258	2.71189	35.7283	2.73209	35.7216	2.7793	35.7237	2.8193	35.7262	2.74364	35.7252	2.52706
41.7962	2.7755	41.7961	2.65802	41.7938	2.61318	41.7944	2.60682	35.8235	2.71206	35.8259	2.73209	35.8192	2.77967	35.8213	2.81978	35.8238	2.74483	35.8228	2.52888
41.91	2.77625	41.91	2.65868	41.9077	2.61338	41.9083	2.60695	35.9211	2.71184	35.9235	2.73192	35.9168	2.78026	35.9189	2.82015	35.9214	2.7457	35.9204	2.5306
42.0239	2.77692	42.0239	2.65948	42.0216	2.61347	42.0222	2.60749	36.0187	2.71169	36.0212	2.73183	36.0144	2.78068	36.0165	2.82008	36.019	2.74627	36.018	2.53244
42.1378	2.77759	42.1378	2.66063	42.1355	2.61341	42.1361	2.60819	36.1163	2.71142	36.1188	2.73198	36.112	2.78112	36.1141	2.81986	36.1166	2.74718	36.1156	2.53463
42.2517	2.77835	42.2517	2.66166	42.2494	2.61354	42.2499	2.60892	36.2139	2.71132	36.2164	2.73169	36.2096	2.78153	36.2117	2.81981	36.2142	2.74774	36.2132	2.53692
42.3656	2.77876	42.3655	2.66261	42.3632	2.61356	42.3638	2.60966	36.3115	2.7111	36.314	2.73145	36.3072	2.78201	36.3093	2.81989	36.3119	2.74811	36.3108	2.53966
42.4795	2.77909	42.4794	2.66345	42.4771	2.61378	42.4777	2.61017	36.4091	2.7107	36.4116	2.73103	36.4048	2.78267	36.4069	2.82009	36.4095	2.74884	36.4085	2.54183
42.5934	2.77918	42.5933	2.66431	42.591	2.61381	42.5916	2.61095	36.5067	2.7105	36.5092	2.73103	36.5024	2.78304	36.5045	2.82049	36.5071	2.74956	36.5061	2.54439
42.7072	2.77898	42.7072	2.66551	42.7049	2.6138	42.7055	2.61179	36.6044	2.71026	36.6069	2.73097	36.6	2.7832	36.6021	2.82094	36.6047	2.75009	36.6037	2.54654
42.8211	2.77852	42.8211	2.66667	42.8188	2.61322	42.8193	2.61262	36.702	2.70995	36.7045	2.73087	36.6976	2.78339	36.6998	2.82131	36.7023	2.75028	36.7013	2.54864
42.935	2.77805	42.935	2.66766	42.9326	2.61278	42.9332	2.61297	36.7996	2.70974	36.8021	2.73072	36.7952	2.78346	36.7974	2.82152	36.7999	2.75033	36.7989	2.55064
43.0489	2.77723	43.0489	2.66854	43.0465	2.61272	43.0471	2.61369	36.8972	2.70949	36.8997	2.73074	36.8928	2.78308	36.895	2.82194	36.8975	2.75072	36.8965	2.55264
43.1628	2.77684	43.1627	2.66934	43.1604	2.61273	43.161	2.61433	36.9948	2.70962	36.9973	2.73064	36.9904	2.78266	36.9926	2.82255	36.9951	2.75089	36.9941	2.55458
43.2767	2.77628	43.2766	2.66953	43.2743	2.61267	43.2749	2.61455	37.0924	2.70984	37.0949	2.73066	37.088	2.78219	37.0902	2.82304	37.0927	2.75066	37.0917	2.55638
43.3905	2.77567	43.3905	2.67037	43.3881	2.61298	43.3888	2.6151	37.19	2.7097	37.1926	2.73092	37.1856	2.78163	37.1878	2.82332	37.1904	2.75022	37.1893	2.55765
43.5044	2.77501	43.5044	2.67107	43.502	2.61299	43.5026	2.61556	37.2876	2.70971	37.2902	2.7311	37.2832	2.78095	37.2854	2.82355	37.288	2.74991	37.2869	2.5591
43.6183	2.77466	43.6183	2.67151	43.6159	2.61304	43.6165	2.61593	37.3852	2.70952	37.3878	2.73156	37.3808	2.78039	37.383	2.8237	37.3856	2.74947	37.3845	2.56044
43.7322	2.77411	43.7322	2.67193	43.7298	2.61391	43.7304	2.61661	37.4829	2.70952	37.4854	2.73179	37.4784	2.77979	37.4806	2.82361	37.4832	2.74888	37.4822	2.56112
43.8461	2.77343	43.846	2.6721	43.8437	2.61445	43.8443	2.61722	37.5805	2.70944	37.583	2.73197	37.576	2.77954	37.5782	2.82351	37.5808	2.74819	37.5798	2.56128
43.96	2.77272	43.9599	2.67277	43.9575	2.61529	43.9582	2.61773	37.6781	2.70943	37.6806	2.7321	37.6736	2.77907	37.6758	2.82335	37.6784	2.74804	37.6774	2.56112
44.0739	2.77186	44.0738	2.67291	44.0714	2.61578	44.0721	2.61838	37.7757	2.70898	37.7783	2.73182	37.7712	2.77889	37.7734	2.82332	37.776	2.74806	37.775	2.56067
44.1877	2.77127	44.1877	2.67266	44.1853	2.61586	44.1859	2.61921	37.8733	2.7088	37.8759	2.73134	37.8688	2.77877	37.871	2.823	37.8736	2.74798	37.8726	2.55976
44.3016	2.77037	44.3016	2.67231	44.2992	2.6161	44.2998	2.61984	37.9709	2.70828	37.9735	2.73096	37.9664	2.77882	37.9686	2.8232	37.9712	2.74806	37.9702	2.55918
44.4155	2.76974	44.4155	2.67174	44.4131	2.61631	44.4137	2.62077	38.0685	2.70782	38.0711	2.7305	38.064	2.77872	38.0662	2.82322	38.0689	2.74843	38.0678	2.55888
44.5294	2.76893	44.5294	2.67112	44.527	2.6164	44.5276	2.62157	38.1661	2.7073	38.1687	2.73033	38.1616	2.77873	38.1638	2.82307	38.1665	2.74901	38.1654	2.55835
44.6433	2.76817	44.6432	2.67045	44.6408	2.6167	44.6415	2.62236	38.2638	2.70672	38.2664	2.73018	38.2592	2.77853	38.2614	2.82287	38.2641	2.74972	38.263	2.55736
44.7572	2.76738	44.7571	2.66998	44.7547	2.61658	44.7553	2.62325	38.3614	2.70631	38.364	2.73022	38.3568	2.77798	38.359	2.82281	38.3617	2.75043	38.3606	2.55675
44.871	2.76683	44.871	2.66922	44.8686	2.61605	44.8692	2.62401	38.459	2.70567	38.4616	2.72991	38.4544	2.77722	38.4567	2.82278	38.4593	2.75067	38.4582	2.55621
44.9849	2.76649	44.9849	2.66832	44.9825	2.6161	44.9831	2.62486	38.5566	2.70515	38.5592	2.72975	38.552	2.77612	38.5543	2.82259	38.5569	2.75091	38.5558	2.55572
45.0988	2.76642	45.0988	2.66707	45.0963	2.61615	45.097	2.6258	38.6542	2.70459	38.6568	2.72947	38.6496	2.77517	38.6519	2.82254	38.6545	2.75113	38.6535	2.55487
45.2127	2.76648	45.2127	2.66608	45.2102	2.61603	45.2109	2.62693	38.7518	2.70441	38.7544	2.72942	38.7472	2.77425	38.7495	2.82264	38.7521	2.7516	38.7511	2.55387
45.3266	2.76658	45.3266	2.66532	45.3241	2.61581	45.3247	2.62779	38.8494	2.70453	38.8521	2.72917	38.8448	2.77358	38.8471	2.82272	38.8497	2.75195	38.8487	2.55336
45.4405	2.76655	45.4404	2.665	45.438	2.61528	45.4386	2.62885	38.947	2.70478	38.9497	2.72923	38.9424	2.77283	38.9447	2.82235	38.9474	2.75267	38.9463	2.5528
45.5544	2.76663	45.5543	2.66531	45.5519	2.61528	45.5525	2.62977	39.0447	2.70492	39.0473	2.72936	39.04	2.77235	39.0423	2.82195	39.045	2.75311	39.0439	2.55255
45.6682	2.76682	45.6682	2.66534	45.6657	2.61534	45.6664	2.63043	39.1423	2.70546	39.1449	2.72916	39.1376	2.7719	39.1399	2.82179	39.1426	2.75406	39.1415	2.55304
45.7821	2.76738	45.7821	2.66545	45.7796	2.61552	45.7803	2.63129	39.2399	2.7063	39.2425	2.72913	39.2352	2.7716	39.2375	2.82159	39.2402	2.75448	39.2391	2.55365
45.896	2.76794	45.896	2.66566	45.8935	2.61604	45.8941	2.63208	39.3375	2.70755	39.3402	2.72923	39.3328	2.77149	39.3351	2.8212	39.3378	2.75503	39.3367	2.55403
46.0099	2.76847	46.0099	2.66585	46.0074	2.61626	46.008	2.63282	39.4351	2.70884	39.4378	2.72959	39.4304	2.77176	39.4327	2.82087	39.4354	2.7557	39.4343	2.55447
46.1238	2.76891	46.1237	2.66611	46.1213	2.6164	46.1219	2.63339	39.5327	2.71017	39.5354	2.73021	39.528	2.77181	39.5303	2.82038	39.533	2.7566	39.5319	2.55541
46.2377	2.76929	46.2376	2.6662	46.2352	2.6167	46.2358	2.63382	39.6303	2.71155	39.633	2.73088	39.6256	2.77188	39.6279	2.82001	39.6306	2.75698	39.6295	2.5567
46.3515	2.76973	46.3515	2.6664	46.349	2.61729	46.3497	2.63406	39.7279	2.71294	39.7306	2.73183	39.7232	2.77189	39.7255	2.81946	39.7282	2.7571	39.7272	2.55801
46.4654	2.76982	46.4654	2.66672	46.4629	2.61828	46.4636	2.63428	39.8255	2.71422	39.8282	2.73311	39.8208	2.77174	39.8231	2.81916	39.8259	2.7572	39.8248	2.55939
46.5793	2.77035	46.5793	2.66689	46.5768	2.61887	46.5774	2.6343	39.9232	2.71536	39.9259	2.7342	39.9184	2.77153	39.9207	2.81874	39.9235	2.75684	39.9224	2.55982
46.6932	2.77048	46.6932	2.66706	46.6907	2.61945	46.6913	2.63411	40.0208	2.71643	40.0235	2.73528	40.016	2.77128	40.0183	2.81863	40.0211	2.75629	40.02	2.55961
46.8071	2.77057	46.8071	2.66739	46.8045	2.62016	46.8052	2.63391	40.1184	2.71739	40.1211	2.73622	40.1136	2.7706	40.1159	2.81855	40.1187	2.75547	40.1176	2.55939
46.921	2.77061	46.9209	2.66798	46.9184	2.62043	46.9191	2.63347	40.216	2.71811	40.2187	2.73717	40.2112	2.77002	40.2135	2.8185	40.2163	2.75501	40.2152	2.55921
47.0349	2.77063	47.0348	2.66845	47.0323	2.62085	47.033	2.63302	40.3136	2.7187	40.3163	2.73801	40.3088	2.76957	40.3112	2.81863	40.3139	2.75435	40.3128	2.55899
47.1487	2.77084	47.1487	2.66881	47.1462	2.62182	47.1468	2.63243	40.4112	2.71931	40.4139	2.73882	40.4064	2.7691	40.4088	2.8186	40.4115	2.75411	40.4104	2.5585
47.2626	2.77092	47.2626	2.66935	47.2601	2.62236	47.2607	2.63172	40.5088	2.71964	40.5116	2.73936	40.504	2.76937	40.5064	2.81876	40.5091	2.75419	40.508	2.55781
47.3765	2.77071	47.3765	2.66993	47.3739	2.62293	47.3746	2.63089	40.6064	2.72006	40.6092	2.7403	40.6016	2.76947	40.604	2.81862	40.6067	2.75453	40.6056	2.55742
47.4904	2.77044	47.4904	2.67037	47.4878	2.6231	47.4885	2.63031	40.7041	2.72042	40.7068	2.74127	40.6992	2.76952	40.7016	2.81874	40.7044	2.75488	40.7032	2.55724
47.6043	2.77033	47.6042	2.67084	47.6017	2.62323	47.6024	2.62967	40.8017	2.72026	40.8044	2.74209	40.7968	2.76979	40.7992	2.81855	40.802	2.7551	40.8009	2.55661
47.7182	2.7699	47.7181	2.67121	47.7156	2.62378	47.7163	2.62887	40.8993	2.72012	40.902	2.74249	40.8944	2.77007	40.8968	2.81864	40.8996	2.75491	40.8985	2.55609
47.832	2.76954	47.832	2.67123	47.8295	2.62403	47.8301	2.6283	40.9969	2.72014	40.9996	2.74285	40.992	2.77036	40.9944	2.81855	40.9972	2.75518	40.9961	2.55539
47.9459	2.769	47.9459	2.67077	47.9434	2.62412	47.944	2.62789	41.0945	2.71976	41.0973	2.74321	41.0896	2.77102	41.092	2.81874	41.0948	2.7549	41.0937	2.55412
48.0598	2.76858	48.0598	2.6699	48.0572	2.62473	48.0579	2.62762	41.1921	2.71919	41.1949	2.74348	41.1872	2.77159	41.1896	2.819	41.1924	2.75483	41.1913	2.55292
48.1737	2.76797	48.1737	2.66906	48.1711	2.62527	48.1718	2.62725	41.2897	2.71833	41.2925	2.74331	41.2848	2.77201	41.2872	2.81928	41.29	2.75456	41.2889	2.5518
48.2876	2.76743	48.2876	2.66843	48.285	2.62535	48.2857	2.62668	41.3873	2.71751	41.3901	2.74335	41.3824	2.77238	41.3848	2.81969	41.3876	2.75371	41.3865	2.55095
48.4015	2.76731	48.4014	2.66798	48.3989	2.62546	48.3995	2.62651	41.485	2.71678	41.4877	2.74308	41.48	2.77233	41.4824	2.82017	41.4852	2.75269	41.4841	2.55017
48.5153	2.76744	48.5153	2.66745	48.5127	2.62538	48.5134	2.62648	41.5826	2.71558	41.5853	2.74275	41.5776	2.77246	41.58	2.82054	41.5829	2.7518	41.5817	2.54882
48.6292	2.76754	48.6292	2.66689	48.6266	2.62572	48.6273	2.62598	41.6802	2.71443	41.683	2.74197	41.6752	2.77239	41.6776	2.82093	41.6805	2.75086	41.6793	2.5478
48.7431	2.76791	48.7431	2.66618	48.7405	2.62554	48.7412	2.62538	41.7778	2.7136	41.7806	2.7413	41.7728	2.77237	41.7752	2.82159	41.7781	2.75001	41.777	2.54701
48.857	2.76812	48.857	2.66567	48.8544	2.62577	48.8551	2.62538	41.8754	2.71284	41.8782	2.74066	41.8704	2.7725	41.8728	2.82216	41.8757	2.74965	41.8746	2.54688
48.9709	2.76871	48.9709	2.66529	48.9683	2.62577	48.9689	2.62544	41.973	2.71212	41.9758	2.74017	41.968	2.77246	41.9704	2.82293	41.9733	2.74902	41.9722	2.54719
49.0848	2.76951	49.0847	2.66505	49.0821	2.62551	49.0828	2.62538	42.0706	2.71146	42.0734	2.7396	42.0656	2.77259	42.068	2.82335	42.0709	2.74862	42.0698	2.54752
49.1986	2.77022	49.1986	2.66516	49.196	2.62532	49.1967	2.62522	42.1682	2.71109	42.171	2.73885	42.1632	2.77274	42.1657	2.82369	42.1685	2.74781	42.1674	2.54802
49.3125	2.77104	49.3125	2.66554	49.3099	2.62475	49.3106	2.62481	42.2659	2.71091	42.2687	2.73825	42.2608	2.77313	42.2633	2.82386	42.2661	2.74708	42.265	2.54842
49.4264	2.7715	49.4264	2.66567	49.4238	2.6242	49.4245	2.62423	42.3635	2.71062	42.3663	2.73771	42.3584	2.77362	42.3609	2.82401	42.3637	2.74648	42.3626	2.54915
49.5403	2.77189	49.5403	2.66558	49.5377	2.62401	49.5384	2.62343	42.4611	2.7104	42.4639	2.73717	42.456	2.77408	42.4585	2.8243	42.4614	2.7457	42.4602	2.54979
49.6542	2.77234	49.6542	2.66555	49.6515	2.62371	49.6522	2.6226	42.5587	2.71064	42.5615	2.73644	42.5536	2.77462	42.5561	2.82469	42.559	2.74479	42.5578	2.55015
49.7681	2.77297	49.768	2.66571	49.7654	2.62352	49.7661	2.6218	42.6563	2.71067	42.6591	2.73585	42.6512	2.77554	42.6537	2.82471	42.6566	2.74363	42.6554	2.5502
49.8819	2.77343	49.8819	2.66569	49.8793	2.62344	49.88	2.62113	42.7539	2.71077	42.7567	2.73508	42.7488	2.77624	42.7513	2.82464	42.7542	2.74254	42.753	2.55021
49.9958	2.77384	49.9958	2.66558	49.9932	2.62285	49.9939	2.62031	42.8515	2.7107	42.8544	2.73484	42.8464	2.77704	42.8489	2.82457	42.8518	2.74153	42.8507	2.55056
50.1097	2.77409	50.1097	2.66562	50.1071	2.62215	50.1078	2.61975	42.9491	2.71063	42.952	2.73461	42.944	2.77779	42.9465	2.82449	42.9494	2.74041	42.9483	2.55091
50.2236	2.77457	50.2236	2.66608	50.2209	2.62178	50.2216	2.61918	43.0467	2.71094	43.0496	2.73482	43.0416	2.77834	43.0441	2.82432	43.047	2.7393	43.0459	2.55152
50.3375	2.77465	50.3375	2.66622	50.3348	2.62063	50.3355	2.6186	43.1444	2.7111	43.1472	2.73527	43.1392	2.77911	43.1417	2.82423	43.1446	2.73828	43.1435	2.5519
50.4514	2.77478	50.4513	2.66601	50.4487	2.61954	50.4494	2.61825	43.242	2.71099	43.2448	2.7357	43.2368	2.77994	43.2393	2.82438	43.2422	2.73724	43.2411	2.55201
50.5653	2.77505	50.5652	2.66586	50.5626	2.61838	50.5633	2.61819	43.3396	2.71085	43.3424	2.73602	43.3344	2.78058	43.3369	2.82424	43.3399	2.73671	43.3387	2.55181
50.6791	2.77524	50.6791	2.66552	50.6765	2.61719	50.6772	2.61804	43.4372	2.71054	43.4401	2.73673	43.432	2.78123	43.4345	2.82398	43.4375	2.7362	43.4363	2.55203
50.793	2.77512	50.793	2.66535	50.7903	2.61626	50.7911	2.61779	43.5348	2.71037	43.5377	2.73719	43.5296	2.78172	43.5321	2.8238	43.5351	2.73585	43.5339	2.553
50.9069	2.77507	50.9069	2.66525	50.9042	2.61477	50.9049	2.61781	43.6324	2.71015	43.6353	2.73782	43.6272	2.78187	43.6297	2.82383	43.6327	2.73585	43.6315	2.5537
51.0208	2.77506	51.0208	2.66569	51.0181	2.61369	51.0188	2.6178	43.73	2.70962	43.7329	2.73849	43.7248	2.78186	43.7273	2.82391	43.7303	2.73576	43.7291	2.55431
51.1347	2.77516	51.1347	2.6658	51.132	2.61276	51.1327	2.61735	43.8276	2.7093	43.8305	2.73906	43.8224	2.78181	43.8249	2.82415	43.8279	2.73568	43.8267	2.55434
51.2486	2.77507	51.2485	2.66586	51.2459	2.61209	51.2466	2.61645	43.9253	2.70869	43.9281	2.73932	43.92	2.78197	43.9226	2.82428	43.9255	2.73557	43.9244	2.55451
51.3624	2.77482	51.3624	2.66588	51.3597	2.61135	51.3605	2.61599	44.0229	2.70816	44.0258	2.7396	44.0176	2.78198	44.0202	2.82446	44.0231	2.7356	44.022	2.55439
51.4763	2.77473	51.4763	2.66575	51.4736	2.61091	51.4743	2.61572	44.1205	2.70763	44.1234	2.74003	44.1152	2.78173	44.1178	2.82477	44.1207	2.73596	44.1196	2.55408
51.5902	2.77453	51.5902	2.66561	51.5875	2.61059	51.5882	2.61575	44.2181	2.70721	44.221	2.74047	44.2128	2.78125	44.2154	2.82483	44.2183	2.73644	44.2172	2.55424
51.7041	2.77436	51.7041	2.66592	51.7014	2.61002	51.7021	2.61619	44.3157	2.70693	44.3186	2.74078	44.3104	2.7807	44.313	2.82523	44.316	2.73654	44.3148	2.5538
51.818	2.7741	51.818	2.6663	51.8153	2.6091	51.816	2.61699	44.4133	2.70682	44.4162	2.74104	44.408	2.78004	44.4106	2.82545	44.4136	2.73646	44.4124	2.55376
51.9319	2.77419	51.9318	2.66675	51.9292	2.60821	51.9299	2.61777	44.5109	2.70634	44.5138	2.74139	44.5056	2.77933	44.5082	2.82593	44.5112	2.73632	44.51	2.55344
52.0457	2.77395	52.0457	2.66691	52.043	2.60792	52.0437	2.6186	44.6085	2.70614	44.6115	2.74168	44.6032	2.77857	44.6058	2.82637	44.6088	2.73614	44.6076	2.55341
52.1596	2.77377	52.1596	2.66715	52.1569	2.60772	52.1576	2.61945	44.7062	2.70635	44.7091	2.74219	44.7008	2.77772	44.7034	2.82693	44.7064	2.73628	44.7052	2.55368
52.2735	2.77401	52.2735	2.66769	52.2708	2.60765	52.2715	2.62039	44.8038	2.70658	44.8067	2.74246	44.7984	2.77654	44.801	2.82733	44.804	2.73641	44.8028	2.55381
52.3874	2.77432	52.3874	2.66813	52.3847	2.60776	52.3854	2.62123	44.9014	2.70696	44.9043	2.74274	44.896	2.77532	44.8986	2.82778	44.9016	2.73659	44.9004	2.55361
52.5013	2.77448	52.5013	2.66834	52.4985	2.60762	52.4993	2.62154	44.999	2.70723	45.0019	2.74261	44.9936	2.77415	44.9962	2.82818	44.9992	2.73726	44.9981	2.55346
52.6152	2.7747	52.6152	2.669	52.6124	2.60771	52.6132	2.62154	45.0966	2.70763	45.0995	2.74225	45.0912	2.77273	45.0938	2.82841	45.0968	2.73775	45.0957	2.55356
52.7291	2.77505	52.729	2.66984	52.7263	2.60795	52.727	2.6213	45.1942	2.70822	45.1972	2.74216	45.1888	2.77114	45.1914	2.82856	45.1945	2.73849	45.1933	2.55375
52.8429	2.77516	52.8429	2.67024	52.8402	2.60869	52.8409	2.62072	45.2918	2.70907	45.2948	2.7419	45.2864	2.76961	45.289	2.82864	45.2921	2.73925	45.2909	2.55451
52.9568	2.77513	52.9568	2.67079	52.9541	2.60946	52.9548	2.61991	45.3894	2.71014	45.3924	2.7413	45.384	2.76813	45.3866	2.82873	45.3897	2.74002	45.3885	2.5542
53.0707	2.77501	53.0707	2.67125	53.0679	2.60995	53.0687	2.61921	45.4871	2.71108	45.49	2.74095	45.4816	2.76672	45.4842	2.82869	45.4873	2.74067	45.4861	2.55351
53.1846	2.77484	53.1846	2.67183	53.1818	2.61055	53.1826	2.61849	45.5847	2.71201	45.5876	2.74042	45.5792	2.76564	45.5818	2.82858	45.5849	2.74094	45.5837	2.55299
53.2985	2.77451	53.2985	2.67194	53.2957	2.61098	53.2964	2.61781	45.6823	2.71307	45.6852	2.73972	45.6768	2.76484	45.6794	2.82824	45.6825	2.74139	45.6813	2.5526
53.4124	2.77409	53.4123	2.67223	53.4096	2.61156	53.4103	2.61744	45.7799	2.71408	45.7829	2.73931	45.7744	2.76409	45.7771	2.82791	45.7801	2.74188	45.7789	2.55233
53.5262	2.77371	53.5262	2.67258	53.5235	2.61221	53.5242	2.61743	45.8775	2.71551	45.8805	2.73911	45.872	2.76349	45.8747	2.82722	45.8777	2.74259	45.8765	2.55217
53.6401	2.77335	53.6401	2.67279	53.6374	2.61299	53.6381	2.61757	45.9751	2.71661	45.9781	2.73882	45.9696	2.76309	45.9723	2.8267	45.9753	2.74308	45.9741	2.55246
53.754	2.77301	53.754	2.67293	53.7512	2.61385	53.752	2.6179	46.0727	2.7176	46.0757	2.73843	46.0672	2.76288	46.0699	2.82609	46.073	2.74334	46.0718	2.55286
53.8679	2.77269	53.8679	2.67266	53.8651	2.61466	53.8659	2.61831	46.1703	2.71847	46.1733	2.73787	46.1648	2.76262	46.1675	2.8256	46.1706	2.74371	46.1694	2.55273
53.9818	2.77248	53.9818	2.67242	53.979	2.61559	53.9797	2.61889	46.2679	2.71931	46.2709	2.73759	46.2624	2.76249	46.2651	2.82479	46.2682	2.74416	46.267	2.5528
54.0957	2.77237	54.0957	2.67204	54.0929	2.6166	54.0936	2.61928	46.3656	2.72004	46.3686	2.73749	46.36	2.76259	46.3627	2.82411	46.3658	2.7448	46.3646	2.55266
54.2095	2.77194	54.2095	2.67156	54.2067	2.61742	54.2075	2.61997	46.4632	2.72096	46.4662	2.7372	46.4576	2.76266	46.4603	2.82298	46.4634	2.74542	46.4622	2.55322
54.3234	2.77175	54.3234	2.6715	54.3206	2.61763	54.3214	2.62058	46.5608	2.72147	46.5638	2.73695	46.5552	2.76266	46.5579	2.82202	46.561	2.74621	46.5598	2.55333
54.4373	2.77162	54.4373	2.67146	54.4345	2.61757	54.4353	2.62141	46.6584	2.72158	46.6614	2.73676	46.6528	2.76271	46.6555	2.82088	46.6586	2.74607	46.6574	2.55313
54.5512	2.77136	54.5512	2.67087	54.5484	2.61728	54.5491	2.62222	46.756	2.72147	46.759	2.7365	46.7504	2.76297	46.7531	2.81971	46.7562	2.74573	46.755	2.5532
54.6651	2.77099	54.6651	2.66991	54.6623	2.61713	54.663	2.62254	46.8536	2.72102	46.8566	2.73627	46.848	2.76339	46.8507	2.81875	46.8538	2.74533	46.8526	2.55328
54.779	2.77073	54.779	2.66925	54.7761	2.61699	54.7769	2.62292	46.9512	2.72066	46.9543	2.73609	46.9456	2.76359	46.9483	2.81756	46.9514	2.7445	46.9502	2.55319
54.8929	2.7707	54.8928	2.66837	54.89	2.6167	54.8908	2.62336	47.0488	2.72044	47.0519	2.73615	47.0432	2.76395	47.0459	2.81637	47.0491	2.74377	47.0478	2.55262
55.0067	2.77054	55.0067	2.66769	55.0039	2.61648	55.0047	2.62393	47.1465	2.72052	47.1495	2.73613	47.1408	2.76456	47.1435	2.81522	47.1467	2.74241	47.1455	2.55234
55.1206	2.77042	55.1206	2.66721	55.1178	2.61586	55.1186	2.62439	47.2441	2.72017	47.2471	2.73612	47.2384	2.76508	47.2411	2.81435	47.2443	2.74075	47.2431	2.55165
55.2345	2.7704	55.2345	2.6666	55.2317	2.61515	55.2324	2.62481	47.3417	2.71975	47.3447	2.73599	47.336	2.76574	47.3387	2.81355	47.3419	2.73926	47.3407	2.55165
55.3484	2.77057	55.3484	2.66604	55.3455	2.61447	55.3463	2.62487	47.4393	2.71943	47.4423	2.73586	47.4336	2.76652	47.4363	2.81301	47.4395	2.73777	47.4383	2.55161
55.4623	2.7709	55.4623	2.6653	55.4594	2.614	55.4602	2.62489	47.5369	2.71936	47.54	2.73595	47.5312	2.76718	47.5339	2.81241	47.5371	2.7368	47.5359	2.55146
55.5762	2.77123	55.5761	2.66467	55.5733	2.61384	55.5741	2.62482	47.6345	2.71915	47.6376	2.7361	47.6288	2.76769	47.6316	2.81191	47.6347	2.73615	47.6335	2.55134
55.69	2.77136	55.69	2.66429	55.6872	2.61325	55.688	2.62461	47.7321	2.71892	47.7352	2.73579	47.7264	2.7681	47.7292	2.81133	47.7323	2.73545	47.7311	2.55098
55.8039	2.77181	55.8039	2.66385	55.8011	2.61231	55.8018	2.62484	47.8297	2.71819	47.8328	2.73526	47.824	2.76821	47.8268	2.81108	47.8299	2.73464	47.8287	2.55006
55.9178	2.77223	55.9178	2.66338	55.915	2.61139	55.9157	2.62492	47.9273	2.71764	47.9304	2.73507	47.9216	2.76807	47.9244	2.81092	47.9276	2.73386	47.9263	2.54888
56.0317	2.77252	56.0317	2.66269	56.0288	2.61036	56.0296	2.62484	48.025	2.71711	48.0281	2.73482	48.0192	2.76813	48.022	2.81088	48.0252	2.73317	48.0239	2.54792
56.1456	2.77281	56.1456	2.66244	56.1427	2.60956	56.1435	2.6243	48.1226	2.71623	48.1257	2.73467	48.1168	2.76834	48.1196	2.81081	48.1228	2.73249	48.1215	2.54688
56.2595	2.77317	56.2595	2.66205	56.2566	2.60898	56.2574	2.62373	48.2202	2.71513	48.2233	2.7346	48.2144	2.76866	48.2172	2.81089	48.2204	2.73217	48.2192	2.54605
56.3733	2.77367	56.3733	2.66166	56.3705	2.6087	56.3712	2.62359	48.3178	2.71385	48.3209	2.7343	48.312	2.76864	48.3148	2.81088	48.318	2.73164	48.3168	2.54488
56.4872	2.77428	56.4872	2.66126	56.4843	2.60893	56.4851	2.62362	48.4154	2.71232	48.4185	2.73439	48.4096	2.76877	48.4124	2.8109	48.4156	2.73136	48.4144	2.54342
56.6011	2.77472	56.6011	2.66063	56.5982	2.60943	56.599	2.62362	48.513	2.711	48.5161	2.73436	48.5072	2.76889	48.51	2.81087	48.5132	2.73069	48.512	2.54251
56.715	2.77502	56.715	2.66006	56.7121	2.60983	56.7129	2.6233	48.6106	2.71001	48.6137	2.73437	48.6048	2.7689	48.6076	2.81114	48.6108	2.73075	48.6096	2.54142
56.8289	2.77548	56.8289	2.66003	56.826	2.61058	56.8268	2.62315	48.7082	2.70932	48.7114	2.73436	48.7024	2.76901	48.7052	2.81155	48.7084	2.73104	48.7072	2.54065
56.9428	2.77593	56.9428	2.66056	56.9399	2.611	56.9406	2.62324	48.8059	2.70885	48.809	2.73448	48.8	2.76894	48.8028	2.81181	48.806	2.73145	48.8048	2.54018
57.0566	2.77637	57.0566	2.66101	57.0537	2.61163	57.0545	2.62347	48.9035	2.70808	48.9066	2.73436	48.8976	2.76928	48.9004	2.81219	48.9037	2.73211	48.9024	2.53982
57.1705	2.77675	57.1705	2.66179	57.1676	2.61253	57.1684	2.62396	49.0011	2.7071	49.0042	2.73404	48.9952	2.76949	48.998	2.81266	49.0013	2.73252	49	2.53988
57.2844	2.77714	57.2844	2.66221	57.2815	2.61295	57.2823	2.62464	49.0987	2.70581	49.1018	2.73366	49.0928	2.76972	49.0956	2.81278	49.0989	2.73323	49.0976	2.54005
57.3983	2.77748	57.3983	2.66271	57.3954	2.61348	57.3962	2.62541	49.1963	2.70499	49.1994	2.73298	49.1904	2.77004	49.1932	2.81271	49.1965	2.73394	49.1952	2.54022
57.5122	2.7774	57.5122	2.66342	57.5093	2.61419	57.5101	2.62606	49.2939	2.70411	49.2971	2.73243	49.288	2.77014	49.2908	2.81275	49.2941	2.73441	49.2929	2.54058
57.6261	2.77734	57.6261	2.66425	57.6232	2.61508	57.6239	2.62671	49.3915	2.70353	49.3947	2.73175	49.3856	2.77008	49.3884	2.81271	49.3917	2.73459	49.3905	2.5407
57.74	2.77706	57.7399	2.66484	57.737	2.61535	57.7378	2.62773	49.4891	2.70303	49.4923	2.73105	49.4832	2.77028	49.4861	2.81267	49.4893	2.73448	49.4881	2.54076
57.8538	2.77681	57.8538	2.66543	57.8509	2.61562	57.8517	2.62892	49.5867	2.70267	49.5899	2.73021	49.5808	2.77072	49.5837	2.81241	49.5869	2.73378	49.5857	2.54077
57.9677	2.77651	57.9677	2.66564	57.9648	2.61589	57.9656	2.62986	49.6844	2.70216	49.6875	2.72976	49.6784	2.77104	49.6813	2.81208	49.6845	2.73311	49.6833	2.54114
58.0816	2.77577	58.0816	2.66572	58.0787	2.6163	58.0795	2.63004	49.782	2.70229	49.7851	2.72929	49.776	2.77146	49.7789	2.81166	49.7822	2.73243	49.7809	2.54184
58.1955	2.77497	58.1955	2.66605	58.1925	2.61664	58.1934	2.63016	49.8796	2.70267	49.8828	2.72891	49.8736	2.77207	49.8765	2.81117	49.8798	2.73179	49.8785	2.54276
58.3094	2.77409	58.3094	2.6665	58.3064	2.61726	58.3072	2.63016	49.9772	2.70324	49.9804	2.72859	49.9712	2.77237	49.9741	2.81076	49.9774	2.73116	49.9761	2.54329
58.4233	2.77306	58.4232	2.6669	58.4203	2.61798	58.4211	2.6306	50.0748	2.70427	50.078	2.72824	50.0688	2.77254	50.0717	2.81065	50.075	2.73075	50.0737	2.54378
58.5371	2.77206	58.5371	2.6672	58.5342	2.61822	58.535	2.63061	50.1724	2.70527	50.1756	2.72783	50.1664	2.77275	50.1693	2.81067	50.1726	2.73034	50.1713	2.54451
58.651	2.77112	58.651	2.66757	58.6481	2.61801	58.6489	2.63029	50.27	2.70654	50.2732	2.72794	50.264	2.77291	50.2669	2.8107	50.2702	2.73008	50.2689	2.54534
58.7649	2.77026	58.7649	2.66792	58.7619	2.61752	58.7628	2.62954	50.3676	2.70791	50.3708	2.72775	50.3616	2.77285	50.3645	2.81097	50.3678	2.72969	50.3666	2.54643
58.8788	2.76955	58.8788	2.66839	58.8758	2.61716	58.8766	2.62852	50.4653	2.70894	50.4685	2.72744	50.4592	2.77254	50.4621	2.8113	50.4654	2.72966	50.4642	2.54704
58.9927	2.76898	58.9927	2.66837	58.9897	2.61694	58.9905	2.62769	50.5629	2.7096	50.5661	2.72704	50.5568	2.77262	50.5597	2.81155	50.563	2.72952	50.5618	2.54774
59.1066	2.76825	59.1065	2.66795	59.1036	2.61691	59.1044	2.62713	50.6605	2.71036	50.6637	2.72693	50.6544	2.77262	50.6573	2.81177	50.6606	2.72919	50.6594	2.54762
59.2204	2.76751	59.2204	2.66747	59.2175	2.61713	59.2183	2.62676	50.7581	2.71086	50.7613	2.72682	50.752	2.77256	50.7549	2.81203	50.7583	2.7289	50.757	2.54722
59.3343	2.76678	59.3343	2.66677	59.3313	2.61713	59.3322	2.62633	50.8557	2.71147	50.8589	2.72684	50.8496	2.77217	50.8525	2.81243	50.8559	2.7287	50.8546	2.54643
59.4482	2.76601	59.4482	2.66588	59.4452	2.61669	59.446	2.62579	50.9533	2.71196	50.9565	2.72668	50.9472	2.77193	50.9501	2.81259	50.9535	2.72892	50.9522	2.54581
59.5621	2.76534	59.5621	2.66518	59.5591	2.6164	59.5599	2.62481	51.0509	2.71239	51.0542	2.72684	51.0448	2.77124	51.0477	2.813	51.0511	2.72917	51.0498	2.54518
59.676	2.7648	59.676	2.66468	59.673	2.61644	59.6738	2.6241	51.1485	2.71253	51.1518	2.72738	51.1424	2.77022	51.1453	2.81343	51.1487	2.72949	51.1474	2.54461
59.7899	2.76462	59.7898	2.66394	59.7869	2.61651	59.7877	2.62373	51.2462	2.71282	51.2494	2.72776	51.24	2.76982	51.2429	2.8137	51.2463	2.73012	51.245	2.5438
59.9037	2.76435	59.9037	2.66279	59.9008	2.61637	59.9016	2.62376	51.3438	2.71296	51.347	2.72813	51.3376	2.76949	51.3406	2.81398	51.3439	2.73088	51.3426	2.54323
60.0176	2.76428	60.0176	2.66174	60.0146	2.61656	60.0154	2.62356	51.4414	2.71305	51.4446	2.72865	51.4352	2.76915	51.4382	2.81452	51.4415	2.73149	51.4403	2.54302
60.1315	2.76396	60.1315	2.66104	60.1285	2.61634	60.1293	2.62292	51.539	2.71299	51.5422	2.72921	51.5328	2.7681	51.5358	2.81537	51.5391	2.73238	51.5379	2.54306
60.2454	2.76393	60.2454	2.66032	60.2424	2.61589	60.2432	2.62193	51.6366	2.71281	51.6399	2.72944	51.6304	2.76707	51.6334	2.81629	51.6368	2.73375	51.6355	2.54333
60.3593	2.76419	60.3593	2.65968	60.3563	2.61534	60.3571	2.62127	51.7342	2.71245	51.7375	2.72955	51.728	2.76636	51.731	2.81721	51.7344	2.73491	51.7331	2.54352
60.4732	2.76445	60.4732	2.65891	60.4701	2.61476	60.471	2.62072	51.8318	2.71206	51.8351	2.72942	51.8256	2.7655	51.8286	2.81803	51.832	2.7357	51.8307	2.54367
60.587	2.76482	60.587	2.65828	60.584	2.61368	60.5849	2.62023	51.9294	2.71151	51.9327	2.72979	51.9232	2.76475	51.9262	2.81877	51.9296	2.73641	51.9283	2.54337
60.7009	2.7654	60.7009	2.65749	60.6979	2.61253	60.6987	2.6195	52.0271	2.71086	52.0303	2.73039	52.0208	2.76426	52.0238	2.81957	52.0272	2.73649	52.0259	2.54315
60.8148	2.76593	60.8148	2.65707	60.8118	2.61142	60.8126	2.61887	52.1247	2.71053	52.1279	2.73097	52.1184	2.76355	52.1214	2.82032	52.1248	2.73627	52.1235	2.54255
60.9287	2.76624	60.9287	2.65671	60.9257	2.61073	60.9265	2.61828	52.2223	2.70991	52.2256	2.73147	52.216	2.76266	52.219	2.8211	52.2224	2.73618	52.2211	2.54221
61.0426	2.76623	61.0426	2.65674	61.0395	2.61018	61.0404	2.61777	52.3199	2.70926	52.3232	2.73218	52.3136	2.76203	52.3166	2.82169	52.32	2.73632	52.3187	2.54147
61.1565	2.766	61.1565	2.65669	61.1534	2.60977	61.1543	2.61748	52.4175	2.70886	52.4208	2.73264	52.4112	2.7617	52.4142	2.82196	52.4176	2.73672	52.4163	2.54111
61.2703	2.76573	61.2703	2.65686	61.2673	2.60982	61.2682	2.61743	52.5151	2.70876	52.5184	2.73331	52.5088	2.76134	52.5118	2.82219	52.5152	2.73724	52.514	2.54094
61.3842	2.7654	61.3842	2.65703	61.3812	2.60983	61.382	2.61711	52.6127	2.70843	52.616	2.73411	52.6064	2.76121	52.6094	2.82235	52.6129	2.73745	52.6116	2.54105
61.4981	2.7652	61.4981	2.65705	61.4951	2.60954	61.4959	2.61656	52.7103	2.70834	52.7136	2.73495	52.704	2.76111	52.707	2.82245	52.7105	2.73749	52.7092	2.54224
61.612	2.76513	61.612	2.65717	61.609	2.60938	61.6098	2.61623	52.808	2.70842	52.8113	2.73583	52.8016	2.76116	52.8046	2.82231	52.8081	2.73744	52.8068	2.54373
61.7259	2.76504	61.7259	2.65739	61.7228	2.60969	61.7237	2.61563	52.9056	2.70899	52.9089	2.73682	52.8992	2.76115	52.9022	2.8224	52.9057	2.73744	52.9044	2.54529
61.8398	2.76473	61.8398	2.65798	61.8367	2.61008	61.8376	2.61533	53.0032	2.70969	53.0065	2.7372	52.9968	2.76189	52.9998	2.82237	53.0033	2.73788	53.002	2.54708
61.9536	2.76438	61.9536	2.65813	61.9506	2.61045	61.9514	2.6151	53.1008	2.71032	53.1041	2.73744	53.0944	2.76302	53.0974	2.82241	53.1009	2.73849	53.0996	2.54864
62.0675	2.76411	62.0675	2.65845	62.0645	2.61082	62.0653	2.61456	53.1984	2.7108	53.2017	2.73766	53.192	2.7638	53.1951	2.8226	53.1985	2.73892	53.1972	2.54987
62.1814	2.76386	62.1814	2.65887	62.1784	2.61127	62.1792	2.6139	53.296	2.71092	53.2993	2.73811	53.2896	2.76458	53.2927	2.82279	53.2961	2.73931	53.2948	2.55114
62.2953	2.76346	62.2953	2.65936	62.2922	2.61196	62.2931	2.61283	53.3936	2.71089	53.397	2.7389	53.3872	2.76507	53.3903	2.82303	53.3937	2.73985	53.3924	2.55161
62.4092	2.76358	62.4092	2.6596	62.4061	2.61283	62.407	2.61197	53.4912	2.71075	53.4946	2.73993	53.4848	2.76621	53.4879	2.82291	53.4913	2.74029	53.49	2.55197
62.5231	2.76375	62.5231	2.66043	62.52	2.61386	62.5208	2.61154	53.5888	2.71105	53.5922	2.74084	53.5824	2.76749	53.5855	2.82286	53.589	2.74031	53.5876	2.55186
62.637	2.76372	62.6369	2.66101	62.6339	2.6153	62.6347	2.6112	53.6865	2.71118	53.6898	2.74238	53.68	2.76886	53.6831	2.8229	53.6866	2.74055	53.6853	2.55109
62.7508	2.76376	62.7508	2.66188	62.7477	2.61667	62.7486	2.6106	53.7841	2.71093	53.7874	2.74408	53.7776	2.77059	53.7807	2.82315	53.7842	2.74113	53.7829	2.55009
62.8647	2.76384	62.8647	2.66258	62.8616	2.61829	62.8625	2.61005	53.8817	2.7106	53.885	2.74547	53.8752	2.77219	53.8783	2.82348	53.8818	2.74159	53.8805	2.54972
62.9786	2.76396	62.9786	2.66302	62.9755	2.61988	62.9764	2.60948	53.9793	2.71007	53.9827	2.74655	53.9728	2.77306	53.9759	2.82352	53.9794	2.74232	53.9781	2.54911
63.0925	2.76408	63.0925	2.66323	63.0894	2.62143	63.0903	2.60908	54.0769	2.70951	54.0803	2.74745	54.0704	2.77422	54.0735	2.82335	54.077	2.74302	54.0757	2.54903
63.2064	2.76414	63.2064	2.66363	63.2033	2.62265	63.2041	2.60896	54.1745	2.70942	54.1779	2.7482	54.168	2.77579	54.1711	2.82286	54.1746	2.74329	54.1733	2.54929
63.3203	2.76455	63.3203	2.66371	63.3172	2.62355	63.318	2.60891	54.2721	2.70974	54.2755	2.74844	54.2656	2.7773	54.2687	2.82236	54.2722	2.7433	54.2709	2.54991
63.4341	2.76518	63.4341	2.66411	63.431	2.62383	63.4319	2.60931	54.3697	2.71042	54.3731	2.74881	54.3632	2.77876	54.3663	2.82187	54.3698	2.74282	54.3685	2.55051
63.548	2.76568	63.548	2.66473	63.5449	2.62355	63.5458	2.60908	54.4674	2.71132	54.4707	2.74869	54.4608	2.77991	54.4639	2.8215	54.4674	2.74205	54.4661	2.55036
63.6619	2.76628	63.6619	2.66542	63.6588	2.62299	63.6597	2.60886	54.565	2.71223	54.5684	2.74849	54.5584	2.78071	54.5615	2.8211	54.5651	2.74164	54.5637	2.55035
63.7758	2.76671	63.7758	2.66624	63.7727	2.62273	63.7735	2.60865	54.6626	2.7131	54.666	2.74784	54.656	2.78127	54.6591	2.82093	54.6627	2.74142	54.6613	2.54928
63.8897	2.76687	63.8897	2.66686	63.8866	2.62268	63.8874	2.60849	54.7602	2.71384	54.7636	2.74705	54.7536	2.78157	54.7567	2.8207	54.7603	2.74137	54.7589	2.54882
64.0036	2.76707	64.0036	2.66733	64.0004	2.62247	64.0013	2.60877	54.8578	2.7142	54.8612	2.74608	54.8512	2.78202	54.8543	2.82027	54.8579	2.74133	54.8566	2.54809
64.1174	2.7676	64.1174	2.66751	64.1143	2.62212	64.1152	2.60887	54.9554	2.71461	54.9588	2.74559	54.9488	2.78225	54.9519	2.81982	54.9555	2.74108	54.9542	2.54705
64.2313	2.76785	64.2313	2.66773	64.2282	2.62125	64.2291	2.60859	55.053	2.715	55.0564	2.74527	55.0464	2.7822	55.0496	2.81933	55.0531	2.74078	55.0518	2.54588
64.3452	2.76811	64.3452	2.6678	64.3421	2.62019	64.3429	2.60832	55.1506	2.71542	55.1541	2.74513	55.144	2.78198	55.1472	2.81895	55.1507	2.74062	55.1494	2.54478
64.4591	2.76831	64.4591	2.66795	64.456	2.61922	64.4568	2.60793	55.2483	2.71589	55.2517	2.74506	55.2416	2.78167	55.2448	2.8186	55.2483	2.74066	55.247	2.54375
64.573	2.76861	64.573	2.66799	64.5698	2.6184	64.5707	2.60797	55.3459	2.71622	55.3493	2.74456	55.3392	2.78159	55.3424	2.81818	55.3459	2.74081	55.3446	2.54356
64.6869	2.76871	64.6869	2.66778	64.6837	2.61793	64.6846	2.60828	55.4435	2.71659	55.4469	2.74388	55.4368	2.78139	55.44	2.81777	55.4436	2.74122	55.4422	2.54372
64.8007	2.76852	64.8007	2.66738	64.7976	2.61761	64.7985	2.60876	55.5411	2.71657	55.5445	2.74323	55.5344	2.78128	55.5376	2.81752	55.5412	2.74161	55.5398	2.54399
64.9146	2.76843	64.9146	2.66741	64.9115	2.61697	64.9124	2.60911	55.6387	2.71662	55.6421	2.74228	55.632	2.78085	55.6352	2.81713	55.6388	2.74193	55.6374	2.54509
65.0285	2.7686	65.0285	2.66745	65.0253	2.61651	65.0262	2.60954	55.7363	2.71686	55.7398	2.74151	55.7296	2.78021	55.7328	2.81683	55.7364	2.74209	55.735	2.54578
65.1424	2.76875	65.1424	2.66732	65.1392	2.61619	65.1401	2.60993	55.8339	2.71716	55.8374	2.74061	55.8272	2.7797	55.8304	2.81659	55.834	2.7423	55.8326	2.54648
65.2563	2.76871	65.2563	2.66755	65.2531	2.61586	65.254	2.61055	55.9315	2.71756	55.935	2.73996	55.9248	2.77968	55.928	2.81624	55.9316	2.74235	55.9303	2.54743
65.3702	2.76903	65.3702	2.66778	65.367	2.61585	65.3679	2.61109	56.0292	2.71817	56.0326	2.73948	56.0224	2.77944	56.0256	2.81605	56.0292	2.74256	56.0279	2.54808
65.484	2.76906	65.484	2.66773	65.4809	2.61655	65.4818	2.61139	56.1268	2.7185	56.1302	2.73867	56.12	2.77907	56.1232	2.81617	56.1268	2.74303	56.1255	2.54819
65.5979	2.76909	65.5979	2.66761	65.5948	2.61759	65.5957	2.61171	56.2244	2.71841	56.2278	2.73816	56.2176	2.77863	56.2208	2.81638	56.2244	2.74349	56.2231	2.54772
65.7118	2.76909	65.7118	2.66709	65.7086	2.61871	65.7095	2.61151	56.322	2.71789	56.3255	2.73801	56.3152	2.77816	56.3184	2.81672	56.322	2.74409	56.3207	2.54713
65.8257	2.76927	65.8257	2.66671	65.8225	2.61971	65.8234	2.61149	56.4196	2.71694	56.4231	2.73805	56.4128	2.77758	56.416	2.81721	56.4197	2.74464	56.4183	2.54716
65.9396	2.7694	65.9396	2.66626	65.9364	2.62077	65.9373	2.61143	56.5172	2.71603	56.5207	2.73789	56.5104	2.77692	56.5136	2.81767	56.5173	2.74522	56.5159	2.54689
66.0535	2.76961	66.0535	2.66575	66.0503	2.62192	66.0512	2.61175	56.6148	2.7149	56.6183	2.7379	56.608	2.77663	56.6112	2.81783	56.6149	2.7457	56.6135	2.54681
66.1673	2.76965	66.1674	2.66521	66.1642	2.6225	66.1651	2.61208	56.7124	2.71371	56.7159	2.73784	56.7057	2.77655	56.7089	2.81822	56.7125	2.74595	56.7111	2.54657
66.2812	2.76956	66.2812	2.66519	66.278	2.62307	66.2789	2.61221	56.8101	2.71285	56.8135	2.73815	56.8033	2.77638	56.8064	2.81864	56.8101	2.74635	56.8087	2.5461
66.3951	2.76931	66.3951	2.66532	66.3919	2.62378	66.3928	2.61266	56.9077	2.71208	56.9112	2.73827	56.9009	2.77612	56.9041	2.81932	56.9077	2.74669	56.9063	2.54547
66.509	2.76902	66.509	2.66567	66.5058	2.62481	66.5067	2.61353	57.0053	2.71125	57.0088	2.73834	56.9985	2.77562	57.0017	2.82006	57.0053	2.74696	57.004	2.54527
66.6229	2.76888	66.6229	2.66602	66.6197	2.62515	66.6206	2.61453	57.1029	2.71019	57.1064	2.73833	57.0961	2.77556	57.0993	2.8205	57.1029	2.74707	57.1016	2.54514
66.7368	2.7688	66.7368	2.66653	66.7336	2.62532	66.7345	2.61569	57.2005	2.70931	57.204	2.73778	57.1937	2.77567	57.1969	2.82092	57.2005	2.74701	57.1992	2.54501
66.8506	2.76857	66.8507	2.66749	66.8474	2.62497	66.8483	2.61683	57.2981	2.70866	57.3016	2.73718	57.2913	2.77554	57.2945	2.82111	57.2981	2.7466	57.2968	2.54426
66.9645	2.768	66.9645	2.66881	66.9613	2.62458	66.9622	2.61788	57.3957	2.70839	57.3992	2.73685	57.3889	2.77549	57.3921	2.82134	57.3957	2.746	57.3944	2.54322
67.0784	2.76757	67.0784	2.66981	67.0752	2.62441	67.0761	2.61882	57.4933	2.70819	57.4969	2.73693	57.4865	2.7753	57.4897	2.82143	57.4934	2.74551	57.492	2.54265
67.1923	2.7671	67.1923	2.6709	67.1891	2.62378	67.19	2.61956	57.591	2.70812	57.5945	2.73691	57.5841	2.77492	57.5873	2.82167	57.591	2.74515	57.5896	2.5417
67.3062	2.76637	67.3062	2.67182	67.303	2.62307	67.3039	2.62041	57.6886	2.70812	57.6921	2.73642	57.6816	2.77471	57.6849	2.82176	57.6886	2.74437	57.6872	2.54142
67.4201	2.7655	67.4201	2.67275	67.4168	2.62223	67.4177	2.6212	57.7862	2.70774	57.7897	2.73606	57.7792	2.77457	57.7825	2.82164	57.7862	2.74315	57.7848	2.54107
67.5339	2.76474	67.534	2.67338	67.5307	2.6211	67.5316	2.62192	57.8838	2.70719	57.8873	2.73567	57.8769	2.7744	57.8801	2.82168	57.8838	2.74215	57.8824	2.54108
67.6478	2.76373	67.6478	2.67402	67.6446	2.61994	67.6455	2.6226	57.9814	2.70656	57.9849	2.73527	57.9745	2.77459	57.9777	2.82165	57.9814	2.74113	57.98	2.54066
67.7617	2.76318	67.7617	2.67482	67.7585	2.61833	67.7594	2.62293	58.079	2.70615	58.0825	2.73516	58.0721	2.77442	58.0753	2.82172	58.079	2.74014	58.0777	2.54076
67.8756	2.7625	67.8756	2.67565	67.8724	2.61663	67.8733	2.62307	58.1766	2.70573	58.1802	2.73528	58.1697	2.77403	58.1729	2.82194	58.1766	2.73909	58.1753	2.54132
[truncated: 25,009 more rows]
