# Supplementary material for: A green lifetime biosensor for calcium that remains bright over its full dynamic range
Source: eLife. 2025 Dec 19;14:RP105086. doi: 10.7554/eLife.105086 (PMC12716836; doi:10.7554/eLife.105086)
Supplement: Figure 9—source data 2. [file elife-105086-fig9-data2.xlsx]

## Sheet: jGCaMP7f
Baseline dF/F	Peak dF/F	Baseline lifetime (ns)	Peak lifetime (ns)
-1.3486440212366326e-16	6.48269	2.3909	2.41499
7.513873832604096e-17	5.90487	2.3733	2.40355
7.41754211680148e-17	4.88313	2.38705	2.41497
-1.0789152169893061e-16	5.44492	2.38895	2.4153

## Sheet: TqCaFLITS
Baseline dF/F	Peak dF/F	Baseline lifetime (ns)	Peak lifetime (ns)
7.076543506553844e-17	1.24822	1.79276	2.69752
9.627950349052849e-17	1.67336	1.82504	2.75514
6.547006237355937e-17	0.334425	1.89392	2.71028
-7.345293329949517e-17	1.46152	1.83778	2.74045
-9.633171580261662e-18	2.3593	1.88499	2.79684

## Sheet: GCaFLITS
Baseline dF/F	Peak dF/F	Baseline lifetime (ns)	Peak lifetime (ns)
-6.179609498229841e-17	-0.338563	2.76889	2.30611
6.65712477763851e-17	-0.482574	2.67184	2.06182
2.6965568719548395e-17	-0.353509	2.61602	2.04304
1.216259505787964e-16	-0.310766	2.62234	2.15811
-3.7549006361306106e-17	-0.406319	2.70931	2.18244
-1.3582771928168944e-16	-0.468335	2.73354	2.13487
-1.3382850985183459e-16	-0.381711	2.77085	2.4437
-1.0590745383958133e-17	-0.227266	2.81968	2.53735
1.8870782684143583e-16	-0.230765	2.73993	2.17567
-2.3107080837726835e-17	-0.127836	2.53517	2.13115
